# Supplementary material
Source: PubMed Central journal article supplement (PMC4124521)
Supplement: NIHMS600569-supplement-1.pdf [file NIHMS600569-supplement-1.pdf]

Supplementary information for

# **Genetic association study of QT interval highlights role for calcium signaling pathways in myocardial repolarization**

## The QT Interval - International GWAS Consortium (QT-IGC)

Dan E. Arking, Sara L. Pulit, Lia Crotti, Pim van der Harst, Patricia B. Munroe, Tamara T. Koopmann, Nona Sotoodehnia, Elizabeth J. Rossin, Michael Morley, Xinchun Wang, Andrew D. Johnson, Alicia Lundby, Daníel F. Gudbjartsson, Peter A. Noseworthy, Mark Eijgelsheim, Yuki Bradford, Kirill V. Tarasov, Marcus Dörr, Martina Müller-Nurasyid, Annukka M. Lahtinen, Ilja M. Nolte, Albert Vernon Smith, Joshua C. Bis, Aaron Isaacs, Stephen J. Newhouse, Daniel S. Evans, Wendy S. Post, Daryl Waggott, Leo-Pekka Lyytikäinen, Andrew A. Hicks, Lewin Eisele, David Ellinghaus, Caroline Hayward, Pau Navarro, Sheila Ulivi, Toshiko Tanaka, David J. Tester, Stéphanie Chatel, Stefan Gustafsson, Meena Kumari, Richard W. Morris, Åsa T. Naluai, Sandosh Padmanabhan, Alexander Kluttig, Bernhard Strohmer, Andrie G. Panayiotou, Maria Torres, Michael Knoflach, Jaroslav A. Hubacek, Kamil Slowikowski, Soumya Raychaudhuri, Runjun D. Kumar, Tamara B. Harris, Lenore J. Launer, Alan R. Shuldiner, Alvaro Alonso, Joel S. Bader, Georg Ehret, Hailiang Huang, W.H. Linda Kao, James B. Strait, Peter W. Macfarlane, Morris Brown, Mark J. Caulfield, Nilesh J. Samani, Florian Kronenberg, Johann Willeit, CARE Consortium, COGENT Consortium, J. Gustav Smith, Karin H. Greiser, Henriette Meyer zu Schwabedissen, Karl Werdan, Massimo Carella, Leopoldo Zelante, Susan R. Heckbert, Bruce M. Psaty, Jerome I. Rotter, Ivana Kolcic, Ozren Polašek, Alan F. Wright, Maura Griffin, Mark J. Daly, DCCT/EDIC, David O. Arnar, Hilma Hólm, Unnur Thorsteinsdottir, eMERGE consortium, Joshua C. Denny, Dan M. Roden, Rebecca L. Zuvich, Valur Emilsson, Andrew S. Plump, Martin G. Larson, Christopher J. O'Donnell, Xiaoyan Yin, Marco Bobbo, Adamo P. D'Adamo, Annamaria Iorio, Gianfranco Sinagra, Angel Carracedo, Steven R. Cummings, Michael A. Nalls, Antti Jula, Kimmo K. Kontula, Annukka Marjamaa, Lasse Oikarinen, Markus Perola, Kimmo Porthan, Raimund Erbel, Per Hoffmann, Karl-Heinz Jöckel, Hagen Kälisch, Markus M. Nöthen, HRGEN consortium, Marcel den Hoed, Ruth J.F. Loos, Dag S. Thelle, Christian Gieger, Thomas Meitinger, Siegfried Perz, Annette Peters, Hanna Prucha, Moritz F. Sinner, Melanie Waldenberger, Rudolf A. de Boer, Lude Franke, Pieter A. van der Vleuten, Britt Maria Beckmann, Eimo Martens, Abdennasser Bardai, Nynke Hofman, Arthur A.M. Wilde, Elijah R. Behr, Chrysoula Dalageorgou, John R. Giudicessi, Argelia Medeiros-Domingo, Julien Barc, Florence Kyndt, Vincent Probst, Alice Ghidoni, Roberto Insolia, Robert M. Hamilton, Stephen W. Scherer, Jeffrey Brandimarto, Kenneth Margulies, Christine E. Moravec, Fabiola Del Greco M., Christian Fuchsberger, Jeffrey R. O'Connell, Wai K. Lee,

Graham C.M. Watt, Harry Campbell, Sarah H. Wild, Nour E. El Mokhtari, Norbert Frey, Folkert W. Asselbergs, Irene Mateo Leach, Gerjan Navis, Maarten P. van den Berg, Dirk J. van Veldhuisen, Manolis Kellis, Bouwe P. Krijthe, Oscar H. Franco, Albert Hofman, Jan A. Kors, André G. Uitterlinden, Jacqueline C.M. Witteman, Lyudmyla Kedenko, Claudia Lamina, Ben A. Oostra, Gonçalo R. Abecasis, Edward G. Lakatta, Antonella Mulas, Marco Orrú, David Schlessinger, Manuela Uda, Marcello R.P. Markus, Uwe Völker, Harold Snieder, Timothy D. Spector, Johan Ärnlöv, Lars Lind, Johan Sundström, Ann-Christine Syvänen, Mika Kivimäki, Mika Kähönen, Nina Mononen, Olli T. Raitakari, Jorma S. Viikari, Vera Adamkova, Stefan Kiechl, Maria Brion, Andrew N. Nicolaides, Bernhard Paulweber, Johannes Haerting, Anna F. Dominiczak, Fredrik Nyberg, Peter H. Whincup, Aroon Hingorani, Jean-Jacques Schott, Connie R. Bezzina, Erik Ingelsson, Luigi Ferrucci, Paolo Gasparini, James F. Wilson, Igor Rudan, Andre Franke, Thomas W. Mühleisen, Peter P. Pramstaller, Terho J. Lehtimäki, Andrew D. Paterson, Afshin Parsa, Yongmei Liu, Cornelia van Duijn, David S. Siscovick, Vilmundur Gudnason, Yalda Jamshidi, Veikko Salomaa, Stephan B. Felix, Serena Sanna, Marylyn D. Ritchie, Bruno H. Stricker, Kari Stefansson, Laurie A. Boyer, Thomas P. Cappola, Jesper V. Olsen, Kasper Lage, Peter J. Schwartz, Stefan Käb, Aravinda Chakravarti, Michael J. Ackerman, Arne Pfeufer, Paul I.W. de Bakker, Christopher Newton-Cheh

# Table of Contents

|                                                                                                            |    |
|------------------------------------------------------------------------------------------------------------|----|
| Table of Contents .....                                                                                    | 3  |
| Supplementary Figure 1. Quantile-quantile plot of GWAS test statistics.....                                | 9  |
| Supplementary Figure 2. Regional association plots for 35 genome-wide significant loci.....                | 11 |
| Supplementary Figure 3. Enrichment of left ventricular enhancers in QT interval-associated loci .....      | 17 |
| Supplementary Figure 4. Protein-protein interaction network.....                                           | 18 |
| Supplementary Figure 5. Model of cardiomyocyte ion channel flux underlying myocardial repolarization ..... | 19 |
| Supplementary Table 1. Clinical characteristics of GWAS, replication cohorts.....                          | 20 |
| Supplementary Table 2. Genotyping and imputation methods .....                                             | 21 |
| Supplementary Table 3. GWAS quality control .....                                                          | 23 |
| Supplementary Table 4. Metabochip replication+finemapping SNP content .....                                | 23 |
| Supplementary Table 5. Metabochip finemapping targets.....                                                 | 24 |
| Supplementary Table 6. 35 genome-wide significant loci associated with QT interval.....                    | 25 |
| Supplementary Table 7. Meta-analysis of directly genotyped SNPs + final GWAS.....                          | 27 |
| Supplementary Table 8a. 68 independent QT SNPs at 35 QT loci .....                                         | 28 |
| Supplementary Table 8b. Missense SNPs correlated with QT SNPs .....                                        | 30 |
| Supplementary Table 9. Association of QT SNPs in African Americans.....                                    | 31 |
| Supplementary Table 10. Association of QT SNPs with heart rate and QRS duration.....                       | 32 |
| Supplementary Table 11. Association of QT SNPs in the NHGRI GWAS Catalog .....                             | 33 |
| Supplementary Table 12. Association of QT SNPs with tissue expression .....                                | 34 |
| Supplementary Table 13. Association of QT SNPs with LV enhancers.....                                      | 38 |
| Supplementary Table 14. Magenta analysis.....                                                              | 53 |
| Supplementary Table 15. Proportion variance explained by QT SNPs .....                                     | 56 |
| Supplementary Table 16. GWIS analysis.....                                                                 | 57 |
| Supplementary Table 17. Long QT Syndrome proband phenotypes.....                                           | 59 |
| Supplementary Table 18. Genes at known or novel loci found in the InWeb database.....                      | 63 |
| Supplementary note.....                                                                                    | 64 |
| Study cohort description for QT GWAS and replication .....                                                 | 65 |
| GWAS cohorts.....                                                                                          | 65 |
| AGES .....                                                                                                 | 65 |
| Amish studies.....                                                                                         | 65 |

|                                    |    |
|------------------------------------|----|
| ARIC .....                         | 66 |
| BLSA .....                         | 66 |
| BRIGHT.....                        | 66 |
| CARLANTINO.....                    | 67 |
| CHS.....                           | 67 |
| Croatia – Korcula.....             | 67 |
| Croatia - Split .....              | 68 |
| DCCT-EDIC.....                     | 68 |
| deCODE.....                        | 68 |
| EMERGE .....                       | 68 |
| ERF .....                          | 69 |
| Framingham Heart Study (FHS) ..... | 69 |
| FVG .....                          | 69 |
| HEALTH2000 .....                   | 70 |
| Health ABC Study.....              | 70 |
| Heinz Nixdorf Recall (HNR) .....   | 70 |
| KORA-F3 / KORA-S4 .....            | 70 |
| LIFELINES.....                     | 71 |
| MICROS.....                        | 71 |
| ORCADES.....                       | 71 |
| PopGen .....                       | 72 |
| PREVEND.....                       | 72 |
| Rotterdam Study.....               | 72 |
| SARDINIA .....                     | 72 |
| SHIP.....                          | 73 |
| TWINS UK.....                      | 73 |
| YOUNGFINNS .....                   | 73 |
| Replication cohorts.....           | 74 |
| BRHS .....                         | 74 |
| BRUNECK .....                      | 74 |
| CARLA .....                        | 74 |
| CYPRUS .....                       | 75 |



|                                                                         |    |
|-------------------------------------------------------------------------|----|
| Czech Post-MONICA .....                                                 | 75 |
| MIDSPAN Family Study .....                                              | 75 |
| Galicia .....                                                           | 76 |
| Health 2000 .....                                                       | 76 |
| HNR.....                                                                | 76 |
| INTERGENE .....                                                         | 77 |
| KORA-F3 / KORA-S4 .....                                                 | 77 |
| PIVUS .....                                                             | 77 |
| PREVEND.....                                                            | 78 |
| SAPHIR .....                                                            | 78 |
| ULSAM .....                                                             | 78 |
| WHITEHALL II .....                                                      | 79 |
| QT interval association analyses (GWAS, validation, meta-analysis)..... | 80 |
| GWAS data quality control .....                                         | 80 |
| GWAS meta-analysis.....                                                 | 80 |
| Interim validation SNP selection.....                                   | 80 |
| Validation genotyping and meta-analysis with GWAS.....                  | 81 |
| Regional association plots .....                                        | 81 |
| Association of QT SNPs in African ancestry cohorts .....                | 83 |
| Pleiotropic effects of QT SNPs .....                                    | 84 |
| QT SNP association with heart rate .....                                | 84 |
| QT SNP association with QRS duration.....                               | 84 |
| QT SNP association with other traits .....                              | 84 |
| Non-synonymous SNPs.....                                                | 85 |
| Expression analyses in non-cardiac tissues .....                        | 86 |
| Expression analyses in cardiac tissue.....                              | 87 |
| Left Ventricular Enhancer Roadmap Analyses.....                         | 89 |
| Gene-set enrichment analysis.....                                       | 90 |
| Variance explained.....                                                 | 91 |
| LQTS cohort mutation analysis .....                                     | 93 |
| LQTS cohorts.....                                                       | 93 |
| Candidate gene mutational analysis.....                                 | 93 |
| DAPPLE protein-protein interaction analysis.....                        | 95 |

|                                                                                                    |            |
|----------------------------------------------------------------------------------------------------|------------|
| InWeb database.....                                                                                | 95         |
| <i>In silico</i> network analysis .....                                                            | 95         |
| Analysis of proteins connecting to the network.....                                                | 96         |
| Description of genes of interest at novel loci associated with QT interval .....                   | 97         |
| Six novel loci coding for calcium handling proteins.....                                           | 97         |
| Six novel loci containing genes that encode proteins involved in transcription control .....       | 98         |
| Three novel loci that contain genes that encode proteins involved in other cellular processes..... | 98         |
| Structural proteins.....                                                                           | 99         |
| <b>EXTENDED ACKNOWLEDGMENTS .....</b>                                                              | <b>100</b> |
| Age, Gene/Environment Susceptibility Study (AGES) .....                                            | 100        |
| Amish studies.....                                                                                 | 100        |
| Atherosclerosis Risk in Communities.....                                                           | 100        |
| Baltimore Longitudinal Study of Aging .....                                                        | 100        |
| British Regional Heart Study .....                                                                 | 101        |
| BRIGHT.....                                                                                        | 101        |
| BRUNECK .....                                                                                      | 101        |
| Cardiovascular Health Study.....                                                                   | 101        |
| CARE-COGENT.....                                                                                   | 101        |
| Carlantino .....                                                                                   | 103        |
| CARLA .....                                                                                        | 103        |
| Croatia-Korcula .....                                                                              | 103        |
| Croatia-Split .....                                                                                | 103        |
| CYPRUS .....                                                                                       | 104        |
| Czech Post-MONICA .....                                                                            | 104        |
| DAPPLE.....                                                                                        | 104        |
| DCCT/EDIC .....                                                                                    | 104        |
| deCODE.....                                                                                        | 104        |
| eMERGE .....                                                                                       | 105        |
| ERF .....                                                                                          | 105        |
| Framingham Heart Study.....                                                                        | 105        |
| FVG .....                                                                                          | 105        |
| Galicia Study .....                                                                                | 105        |

|                                                        |     |
|--------------------------------------------------------|-----|
| Health ABC Study .....                                 | 106 |
| Health 2000 .....                                      | 106 |
| Heinz Nixdorf Recall (HNR) .....                       | 106 |
| Intergene .....                                        | 106 |
| KORA F3/S4 .....                                       | 106 |
| LifeLines .....                                        | 107 |
| LQTS-Amsterdam .....                                   | 107 |
| LQTS-London .....                                      | 107 |
| LQTS-Mayo .....                                        | 107 |
| LQTS-Nantes .....                                      | 107 |
| LQTS-Pavia .....                                       | 108 |
| LQTS-Toronto .....                                     | 108 |
| MAGNet left ventricle eSNP .....                       | 108 |
| MICROS .....                                           | 108 |
| MIDSPAN Family Study .....                             | 108 |
| ORCADES .....                                          | 108 |
| PIVUS .....                                            | 108 |
| PopGen .....                                           | 109 |
| PREVEND .....                                          | 109 |
| Rotterdam Study-I and II .....                         | 109 |
| SAPHIR .....                                           | 109 |
| SardiNIA .....                                         | 109 |
| Study of Health in Pomerania (SHIP) .....              | 110 |
| TWINS UK .....                                         | 110 |
| ULSAM .....                                            | 110 |
| WHITEHALL II .....                                     | 110 |
| Young Finns Study .....                                | 111 |
| Role of the Sponsor .....                              | 111 |
| Consortia membership lists .....                       | 112 |
| Membership of the CARE-COGENT QT consortium .....      | 112 |
| Membership of the HRGEN consortium .....               | 114 |
| Membership of the DCCT/EDIC Study Research Group ..... | 120 |

|                                                |     |
|------------------------------------------------|-----|
| Membership of the eMERGE consortium .....      | 123 |
| Websites accessed .....                        | 124 |
| MANTEL .....                                   | 124 |
| GWIS .....                                     | 124 |
| NHGRI GWAS Catalog .....                       | 124 |
| SNAP .....                                     | 124 |
| DAPPLE.....                                    | 124 |
| PolyPhen.....                                  | 124 |
| SIFT .....                                     | 124 |
| References for supplementary information ..... | 125 |

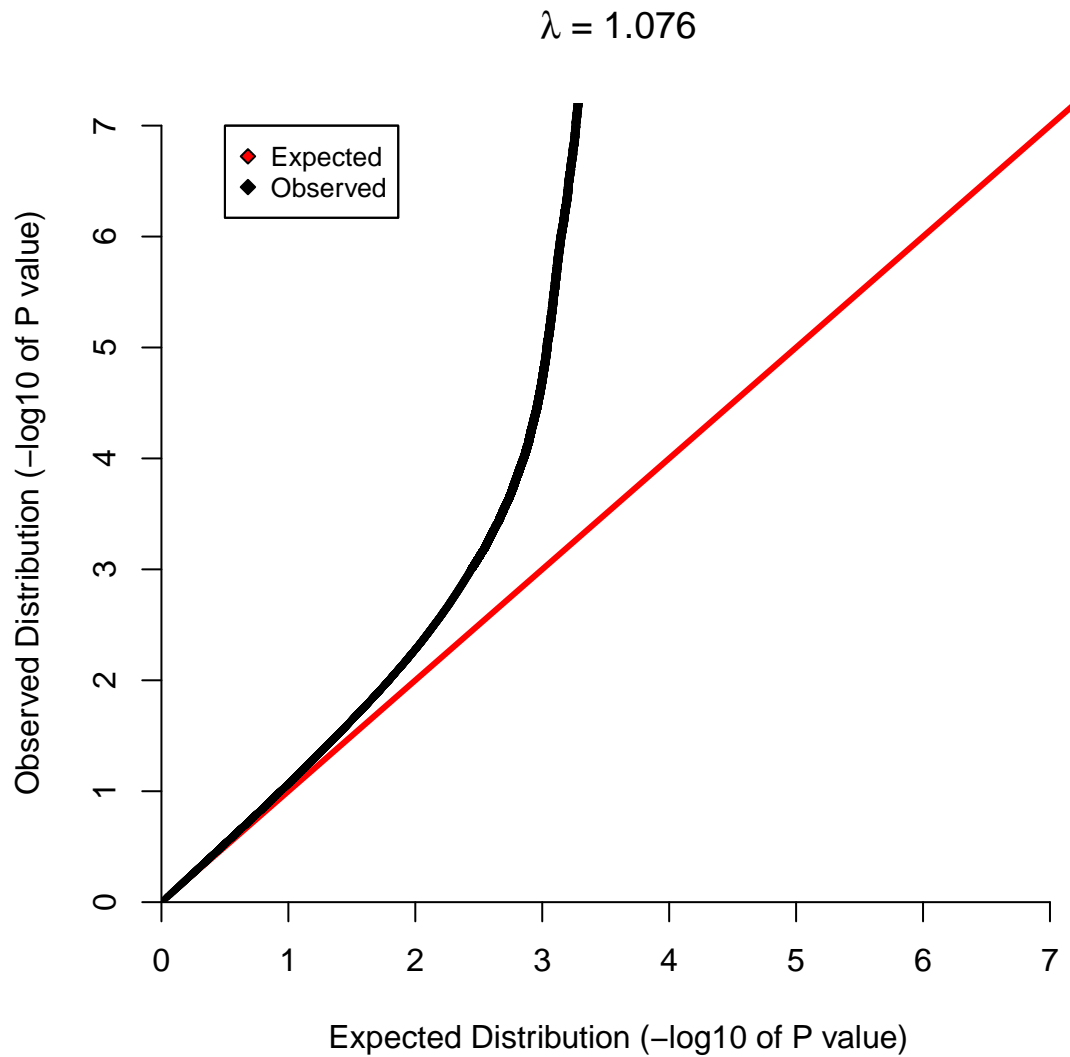

Supplementary Figure 1A. Quantile-quantile plot of GWAS test statistics. Plotted in Supplementary Figure 1A are the observed (y-axis) versus the expected (x-axis)  $-\log(P)$  for the  $\sim 2.5$  million SNPs tested for association with QT interval in the meta-analysis of GWAS results for 76,198 individuals of European ancestry, along with the ratio of the observed to expected median test statistic ( $\lambda_{GC}$ ). In Supplementary Figure 1B, the same results are presented after removing all results within 500kb of the index SNP at each locus.

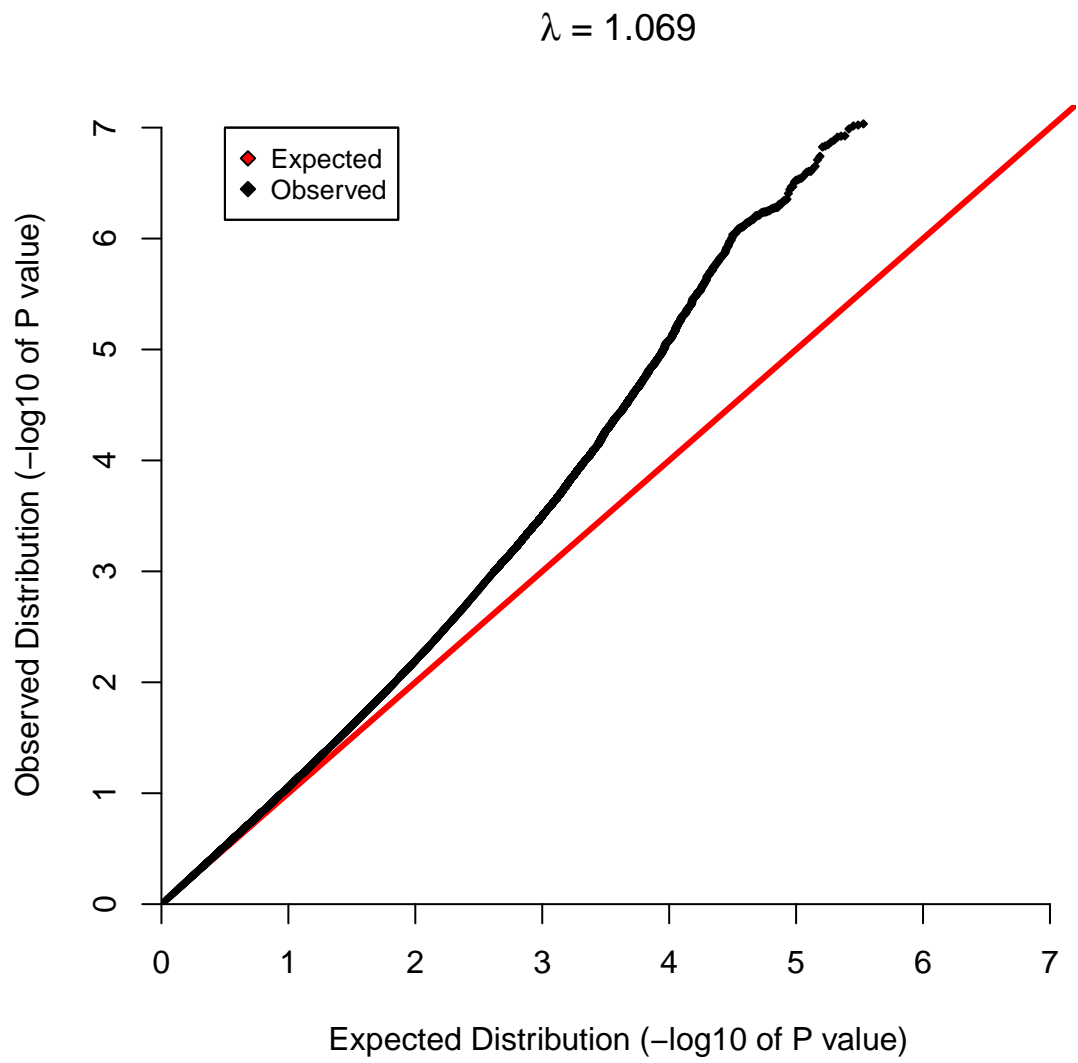

Supplementary Figure 1B

Supplementary Figure 2: Regional association plots for 35 genome-wide significant loci. Plotted on the following pages are the  $-\log(P)$  from meta-analysis of association of SNPs with QT interval in the 76,198 individuals of European ancestry with GWAS. For comparability of SNP association no replication results are incorporated, hence some top SNPs in the GWAS-only results presented fail to achieve genome-wide significance (dashed line) because replication results were needed to cross this threshold. At the extreme, minimal association with rs1805128, a missense SNP in *KCNE1*, is found in the GWAS-only results depicted in the figure due to very low MAF ( $\sim 1\%$ ) and resultant poor imputation using common variants on most genotyping arrays. Only with direct replication genotyping in several of the GWAS samples was this SNP able to reach genome-wide significance. Results are shown for any SNP within 500kb of the index SNP at each locus.

### ATP1B1

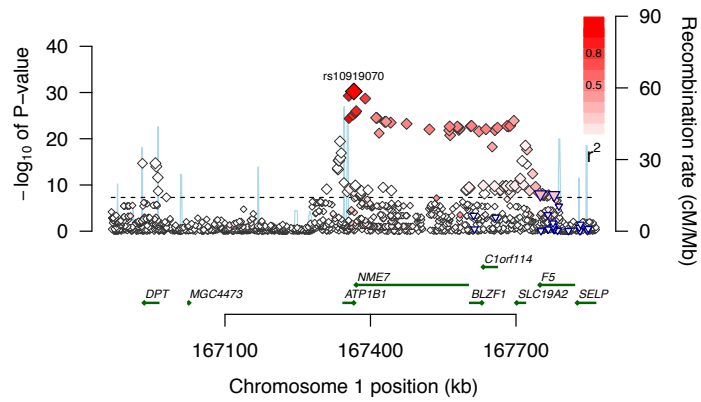

### TCEA3

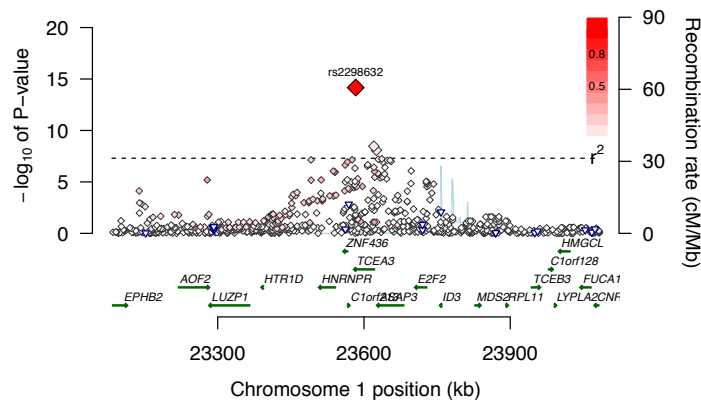

### NOS1AP

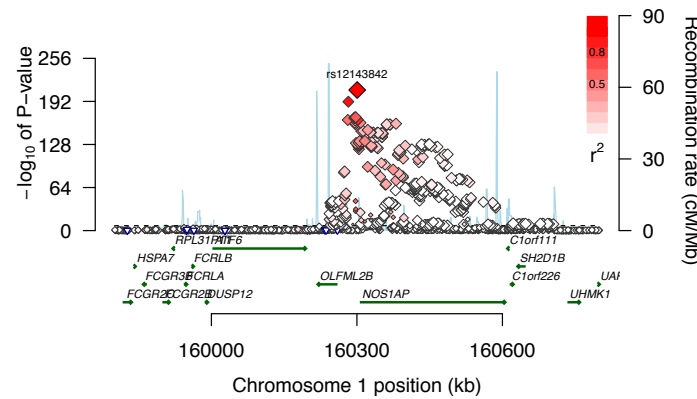

### RNF207

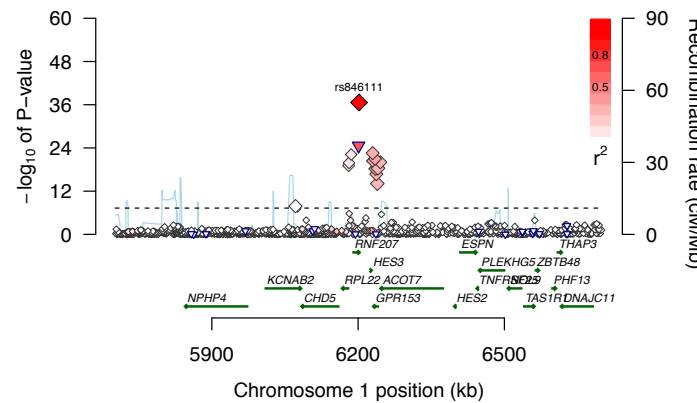

### CCDC141

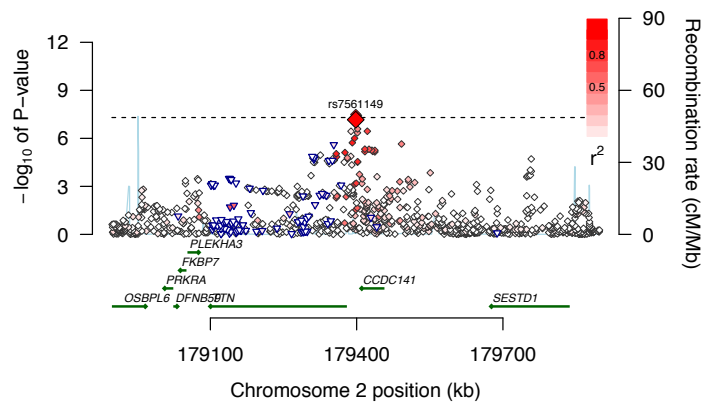

### SLC8A1

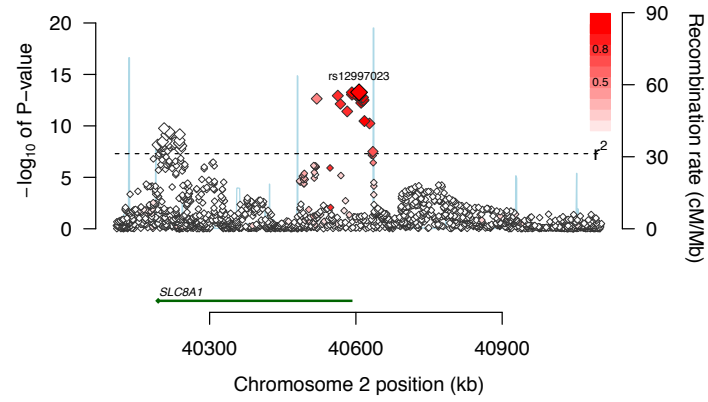

### LOC26010

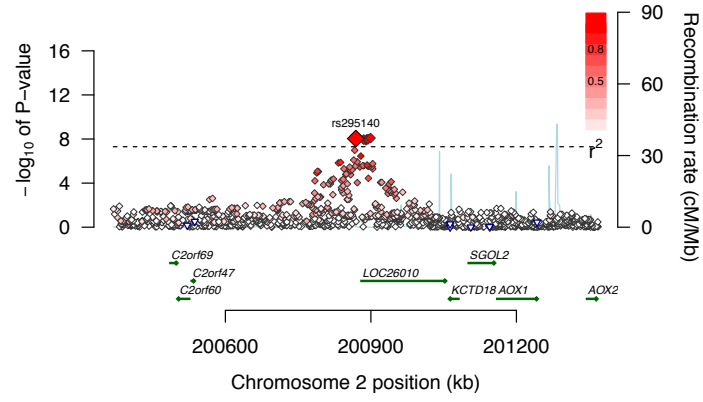

### SP3

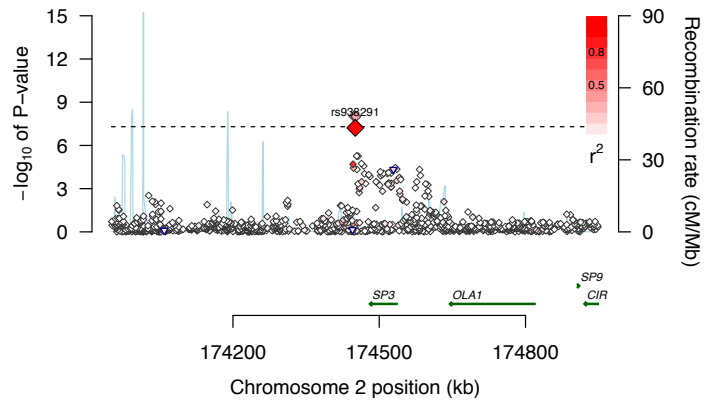

### C3orf75

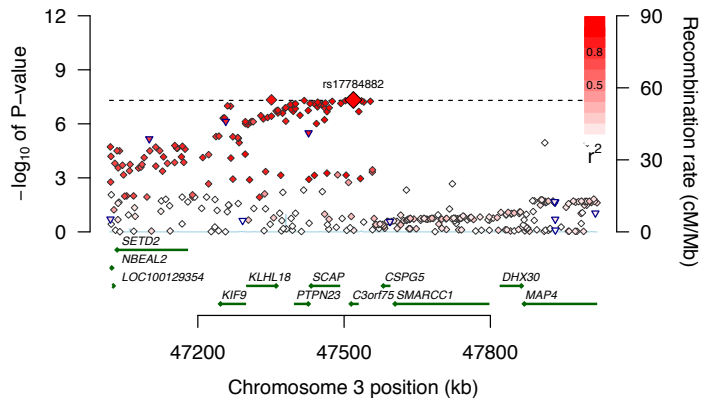

### SCN5A

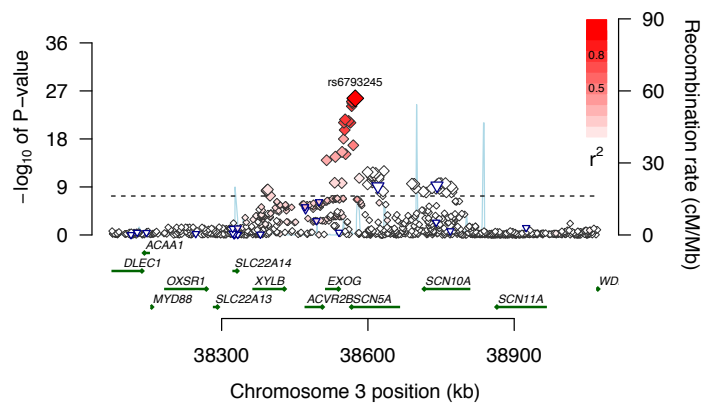

### SLC4A4

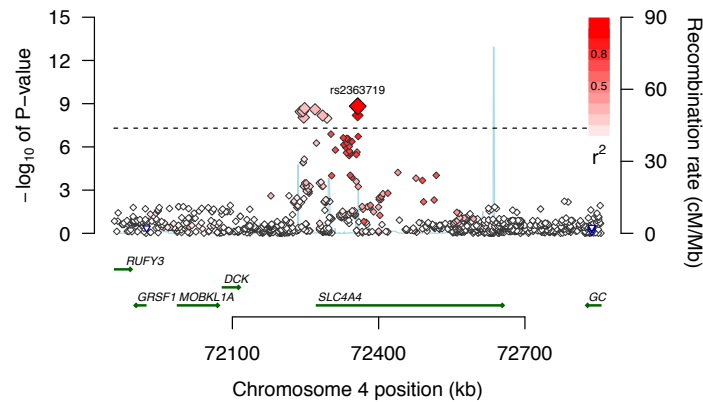



### SMARCD1

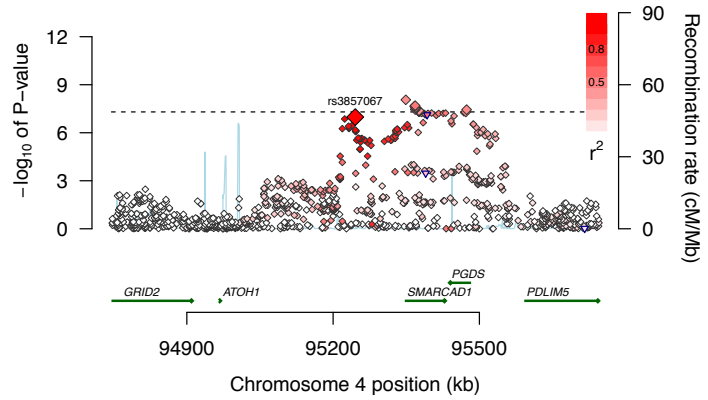

### GFRA3

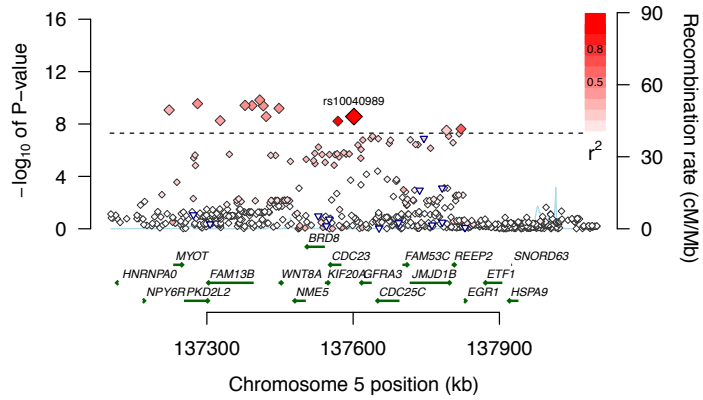

### SLC35F1--PLN

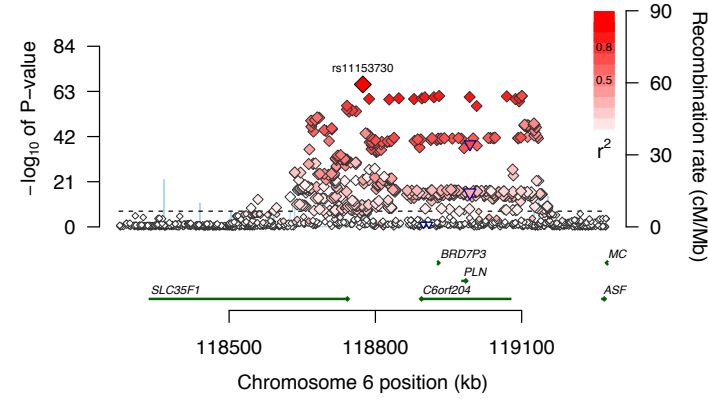

### GMPR

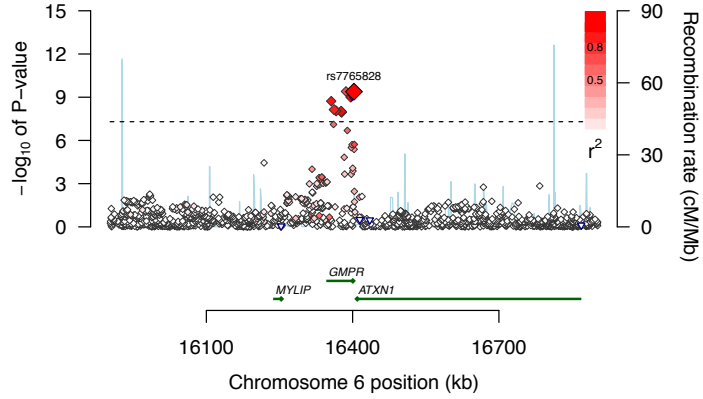

### CAV1

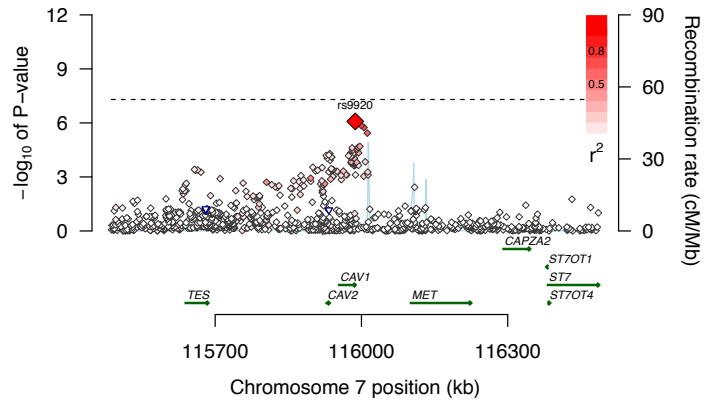

### KCNH2

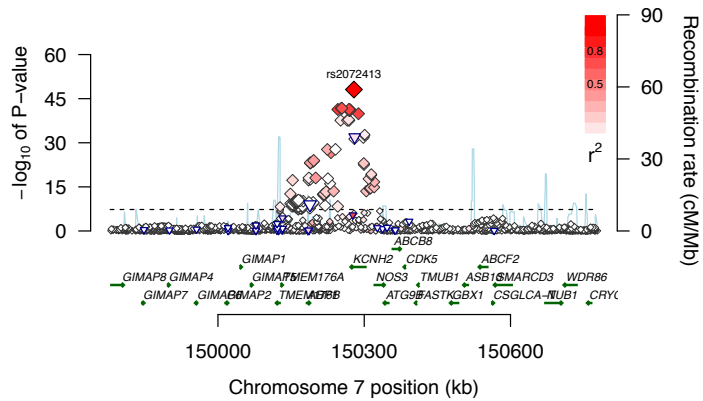

### NCOA2

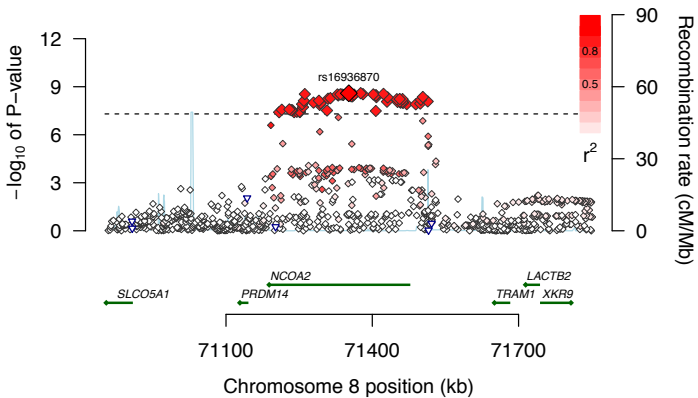

### LAPT4B

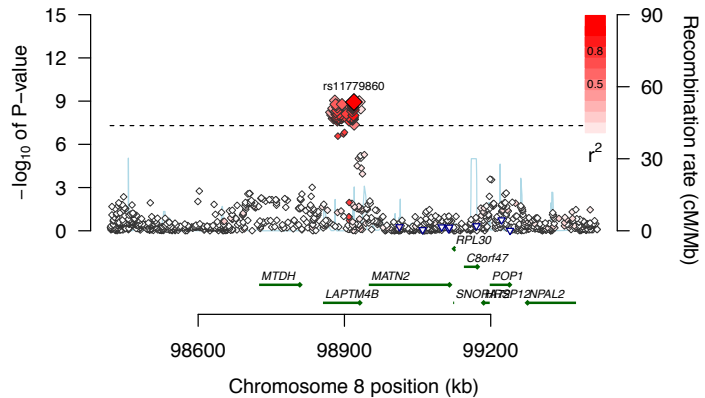

### AZIN1

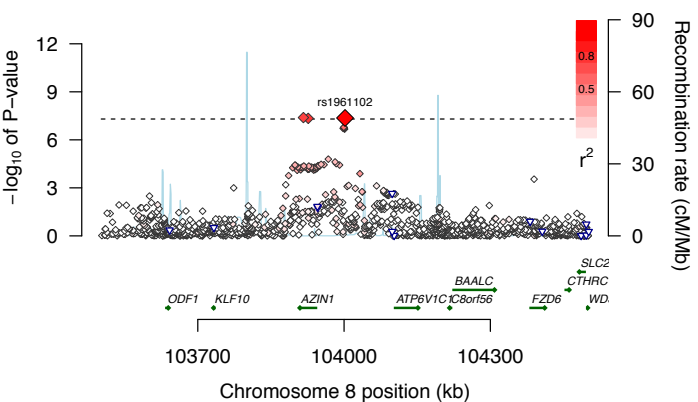

### GBF1

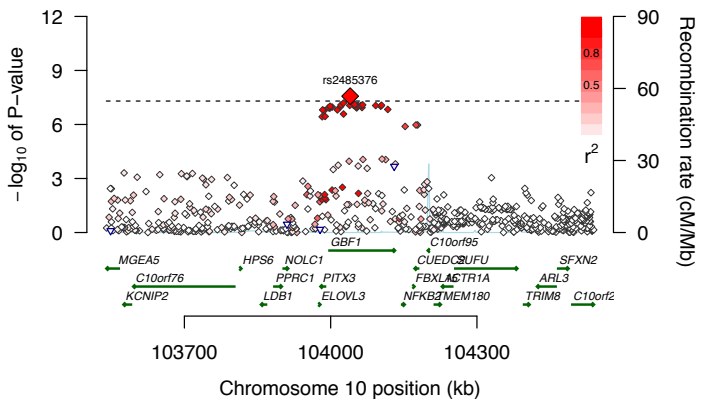

### KCNQ1

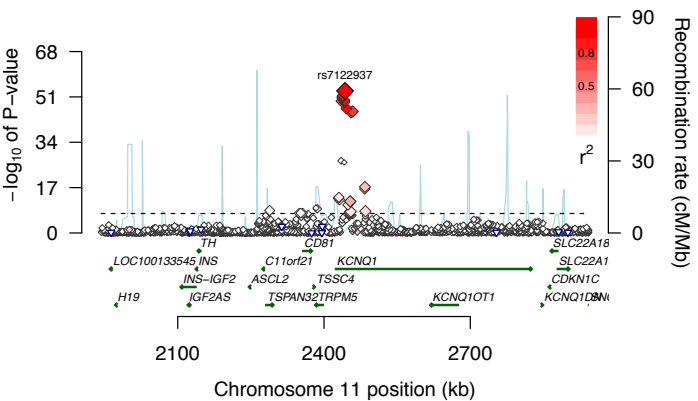

### FADS2

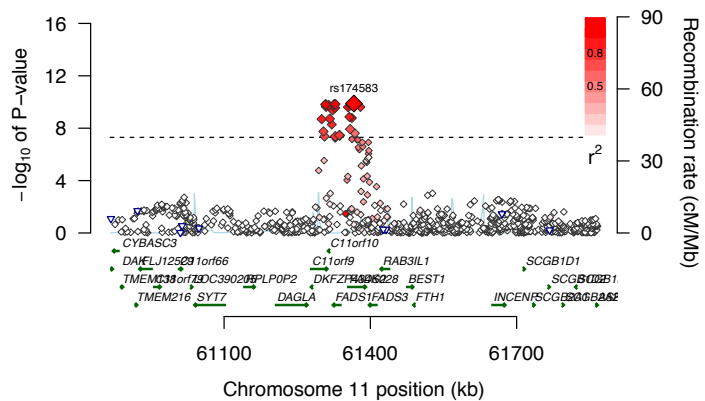

### ATP2A2

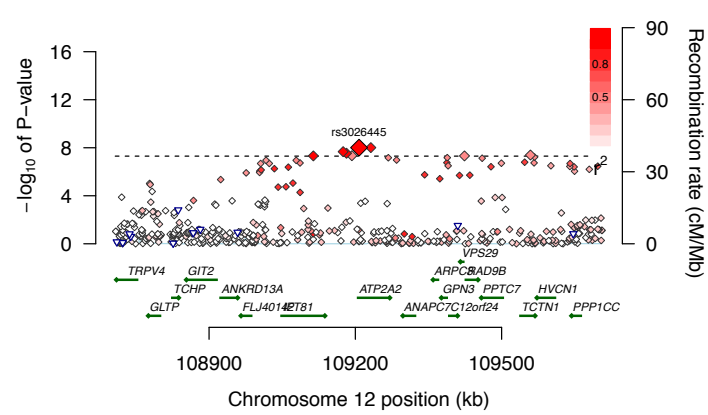

### KLF12

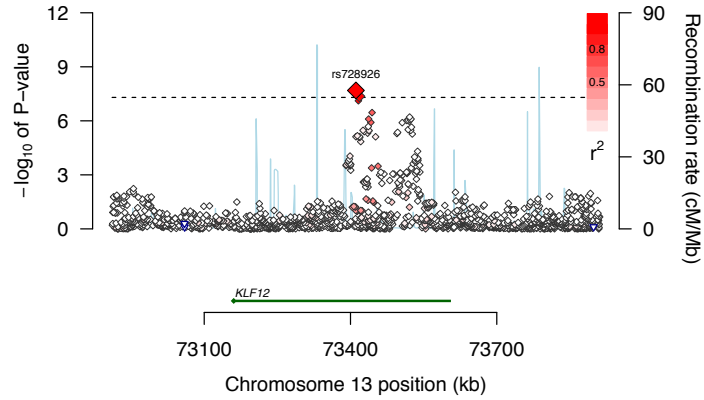

### ANKRD9

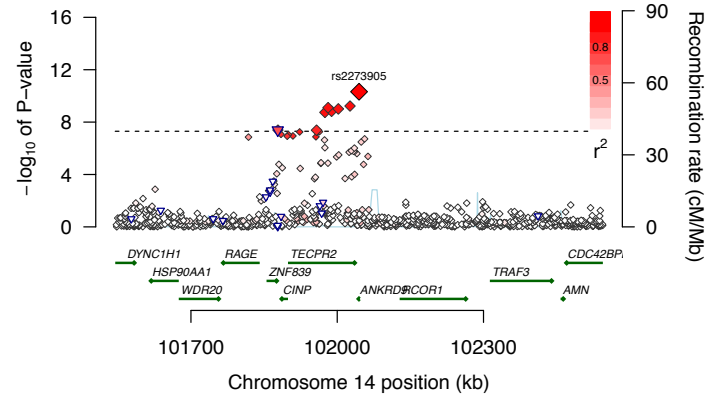

### USP50--TRPM7

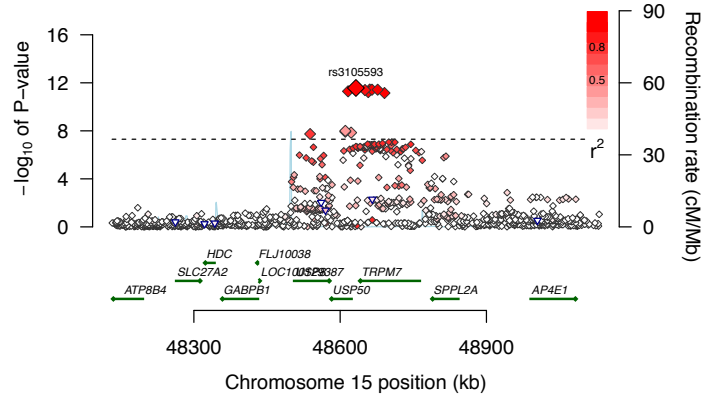

### CREBBP

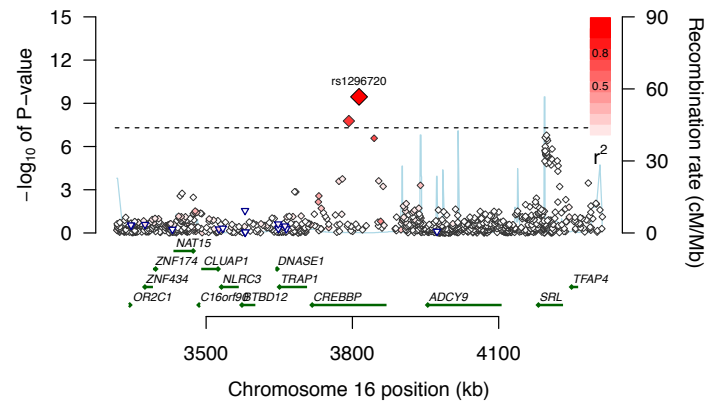

### MKL2

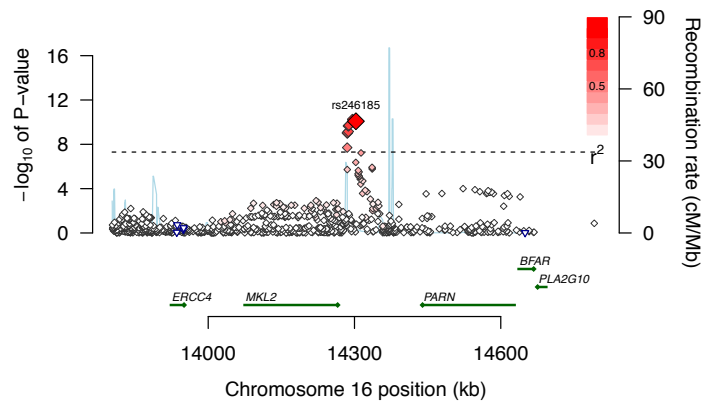

### LITAF

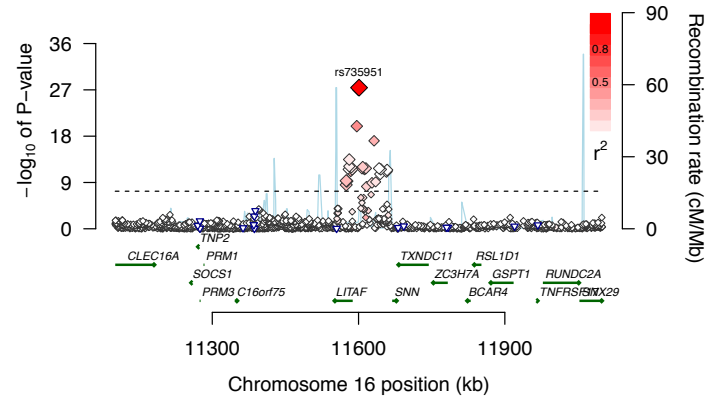

### CNOT1

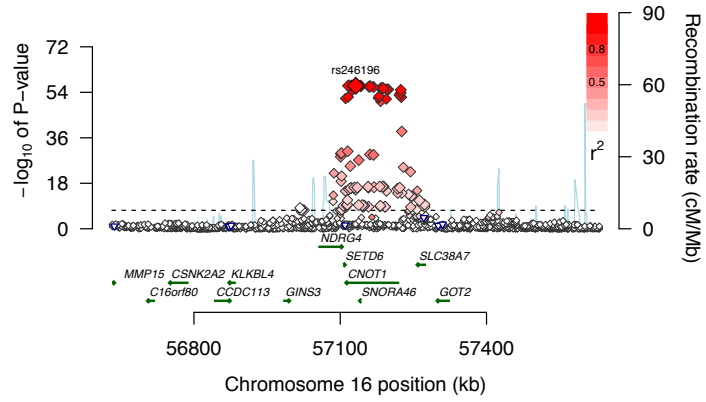

### LIG3

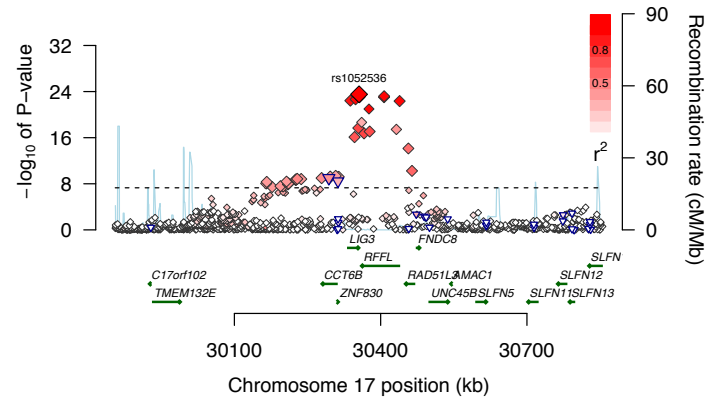

### KCNJ2

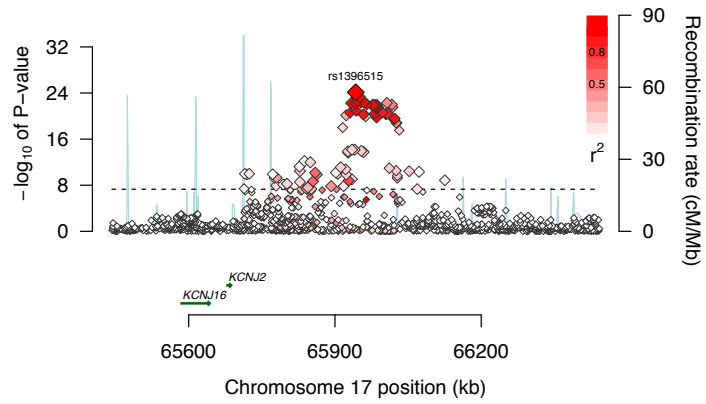

### PRKCA

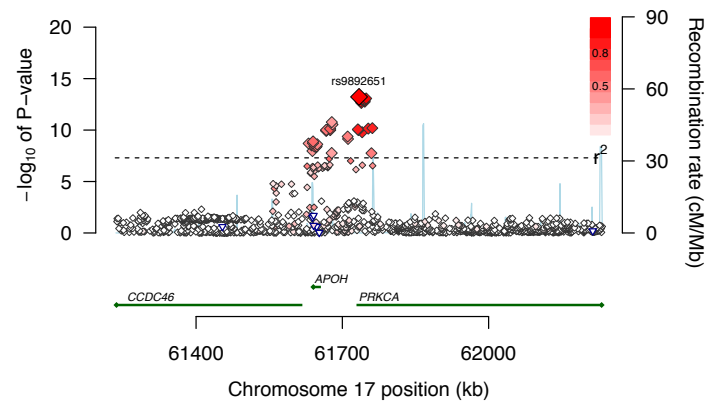

### KCNE1

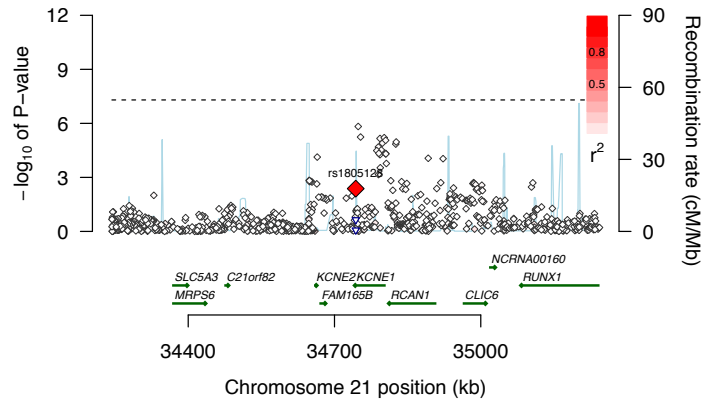

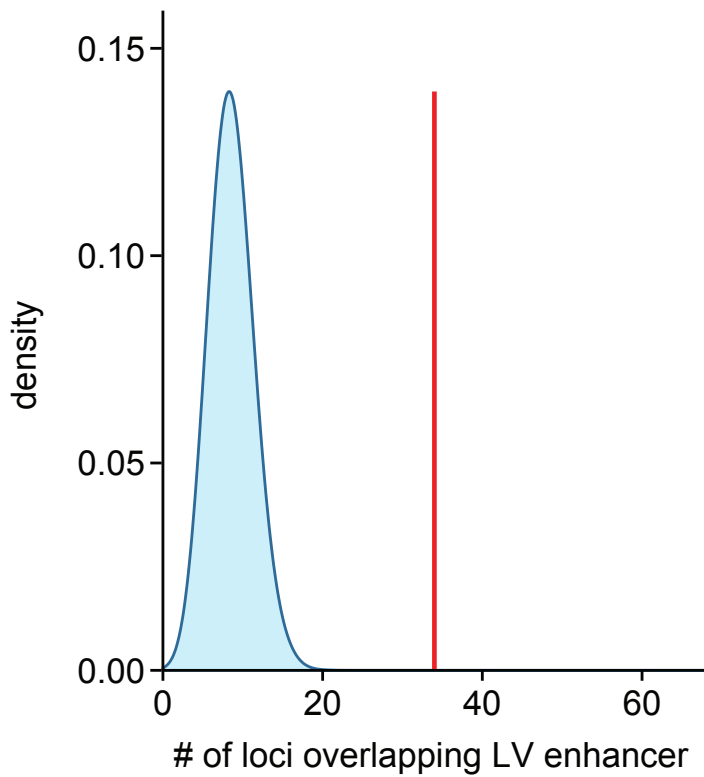

Supplementary Figure 3. Enrichment of left ventricular enhancers in QT interval-associated loci Enrichment was computed by comparing the number of QT interval loci that include at least one lead or highly correlated ( $r^2 > 0.8$ ) SNP overlapping an LV enhancer (red line, cf Supplementary Table 13) to 100,000 sets of randomly sampled control loci matched for minor allele frequency, number of SNPs in high LD ( $r^2 > 0.8$ ) and distance to nearest gene.

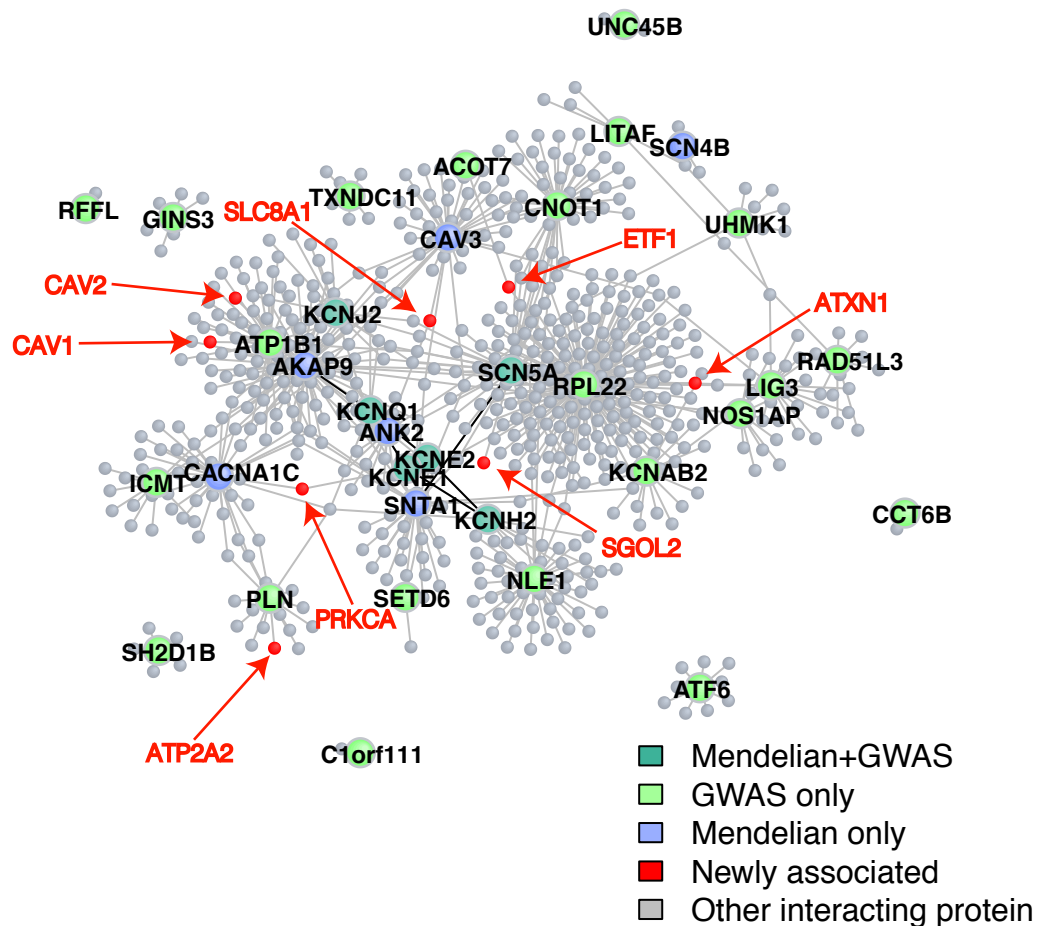

Supplementary Figure 4. Protein-protein interaction network. Shown is a network of protein-protein interactions seeded with Mendelian LQTS-susceptibility genes (purple) and genes at 7 previously published QT-associated loci (light green) or both (dark green). We identified 606 proteins interacted directly with the seeds, 8 of which (from 5 loci) were among the 85 newly associated proteins discovered by QT-IGC (Supplementary Table 18), a significant enrichment beyond chance expectation ( $p=0.029$ , see Supplementary Methods above).

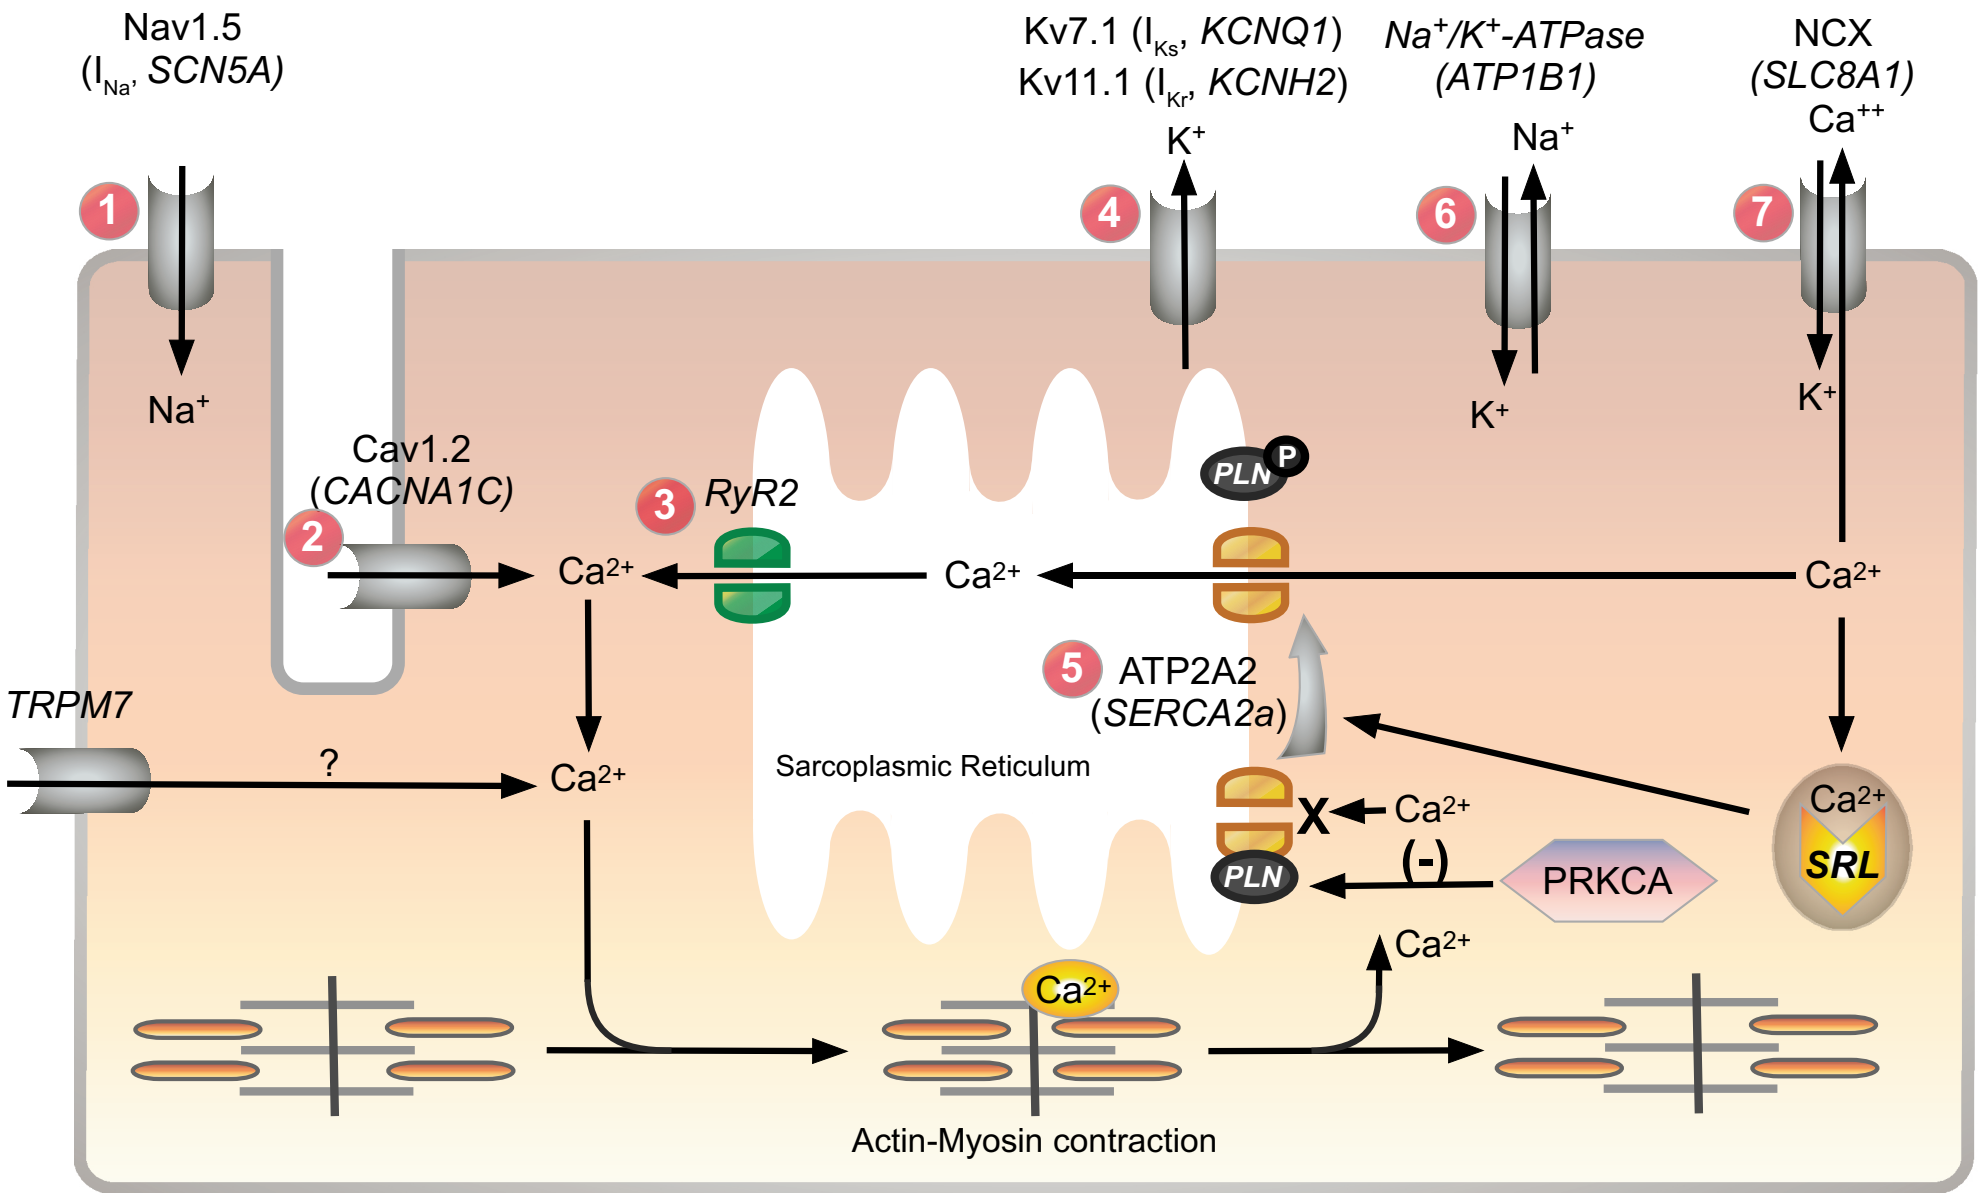

Supplementary Figure 5. Model of cardiomyocyte ion channel flux underlying myocardial repolarization. Cellular depolarization begins with (1)  $\text{Na}^+$  influx ( $I_{\text{Na}}$  encoded by SCN5A), which opens (2) voltage-gated L-type  $\text{Ca}^{2+}$  channels in the sarcolemma which maintains depolarization and provides the calcium influx that in turn, (3) activates large-scale release of  $\text{Ca}^{2+}$  to the cytoplasm through calcium-gated  $\text{Ca}^{2+}$  channels (ryanodine receptor, RyR2) in the sarcoplasmic reticulum, with resultant excitation-contraction coupling via calcium-induced calcium release. Repolarization results from (4) efflux of potassium (via Kv7.1 and Kv11.1 channels encoded by KCNQ1 and KCNH2) and (5) reuptake of  $\text{Ca}^{2+}$  in the sarcoplasmic reticulum by the sarcoplasmic reticulum  $\text{Ca}^{2+}$  ATPase (SERCA2a encoded by ATP2A2) regulated by phospholamban (encoded by PLN), in turn regulated by PRKCA, and stabilized by sarcalumenin (SRL). The  $\text{Na}^+$  that enters the myocyte in (1) is counterbalanced by an active (6)  $\text{Na}^+/\text{K}^+$  ATPase (ATP1B1). The  $\text{Ca}^{2+}$  that enters the myocyte in (2) is counterbalanced by (7) the  $\text{Na}^+/\text{Ca}^{2+}$  exchanger (NCX1 encoded by SLC8A1) to ensure net even  $\text{Ca}^{2+}$  balance.

|                                     | N after exclusions | Age, years, mean $\pm$ SD | Sex, Men, % | RR interval, ms, mean $\pm$ SD | QT interval, ms, mean $\pm$ SD | QTc, Bazett's correction*, ms, mean $\pm$ SD | SD of QT residual after covariate adjustment |
|-------------------------------------|--------------------|---------------------------|-------------|--------------------------------|--------------------------------|----------------------------------------------|----------------------------------------------|
| <b>1a: GWAS cohorts</b>             |                    |                           |             |                                |                                |                                              |                                              |
| AGES                                | 2522               | 68.6 $\pm$ 8.6            | 40.3%       | 882.5 $\pm$ 164.8              | 398.6 $\pm$ 29.0               | 426.5 $\pm$ 22.5                             | 18.1                                         |
| Amish studies                       | 1124               | 49.8 $\pm$ 15.8           | 49.6%       | 1061.9 $\pm$ 161.6             | 411.6 $\pm$ 62.4               | 404.4 $\pm$ 55.7                             | 18.1                                         |
| ARIC                                | 8524               | 54.2 $\pm$ 5.7            | 46.5%       | 927.7 $\pm$ 138.2              | 399.1 $\pm$ 29.4               | 415.8 $\pm$ 17.2                             | 15.0                                         |
| BLSA                                | 477                | 68.2 $\pm$ 13.9           | 49.5%       | 962.0 $\pm$ 154.4              | 415.6 $\pm$ 29.8               | 424.9 $\pm$ 22.1                             | 19.0                                         |
| BRIGHT                              | 1392               | 50.2 $\pm$ 36.0           | 56.70%      | 969.73 $\pm$ 89.77             | 414.5 $\pm$ 33.8               | 421.20 $\pm$ 25.08                           | 23.3                                         |
| Carlantino                          | 383                | 48.8 $\pm$ 16.2           | 38.2%       | 891.8 $\pm$ 129.4              | 389.4 $\pm$ 27.0               | 405.1 $\pm$ 19.1                             | 19.1                                         |
| CHS                                 | 2457               | 73 $\pm$ 5.5              | 56.1%       | 950.9 $\pm$ 152.1              | 414.8 $\pm$ 32.8               | 427.4 $\pm$ 20.7                             | 17.3                                         |
| Croatia - Korcula                   | 363                | 54.34 $\pm$ 13.46         | 36.6%       | 938.4 $\pm$ 147.0              | 400.3 $\pm$ 28.99              | 418.42 $\pm$ 22.71                           | 18.8                                         |
| Croatia - Split                     | 365                | 49.07 $\pm$ 14.75         | 38.9%       | 934.3 $\pm$ 136.6              | 399.2 $\pm$ 26.9               | 415.19 $\pm$ 22.15                           | 17.6                                         |
| DCCT/EDIC                           | 1118               | 46 $\pm$ 7                | 47.3%       | 890.0 $\pm$ 147                | 387.6 $\pm$ 29.2               | 413.0 $\pm$ 20                               | 17.3                                         |
| deCODE                              | 8,961              | 68.9 $\pm$ 13.7           | 45.6%       | 851.0 $\pm$ 201.7              | 387.7 $\pm$ 46.5               | 421.8 $\pm$ 30.7                             | 22.1                                         |
| eMERGE                              | 5272               | 55.6 $\pm$ 13.7           | 46.8%       | 873 $\pm$ 131.1                | 387.5 $\pm$ 28.8               | 415.7 $\pm$ 20.0                             | 19.2                                         |
| ERF                                 | 1481               | 47.9 $\pm$ 14.3           | 40.7%       | 975.9 $\pm$ 157.4              | 398.0 $\pm$ 28.1               | 404.8 $\pm$ 23.5                             | 18.7                                         |
| FHS                                 | 7429               | 40.0 $\pm$ 10.6           | 45.0%       | 908.3 $\pm$ 165.3              | 390.6 $\pm$ 36.7               | 412.2 $\pm$ 22.0                             | 20.7                                         |
| FVG Genetic Park                    | 497                | 50.8 $\pm$ 16.3           | 39.2%       | 938.1 $\pm$ 160.9              | 401.4 $\pm$ 30.1               | 409.9 $\pm$ 27.5                             | 19.2                                         |
| Health2000                          | 1921               | 49.9 $\pm$ 10.8           | 47.7%       | 978.4 $\pm$ 161.0              | 388.5 $\pm$ 30.0               | 394.9 $\pm$ 22.3                             | 18.8                                         |
| HealthABC                           | 1305               | 73.64 $\pm$ 2.78          | 51.0%       | 955.15 $\pm$ 152.55            | 412.89 $\pm$ 35.39             | 424.47 $\pm$ 27.45                           | 25.5                                         |
| HNR                                 | 346                | 54.6 $\pm$ 5.4            | 48.6%       | 905.4 $\pm$ 136.4              | 391.5 $\pm$ 28.3               | 411.4 $\pm$ 23                               | 12.6                                         |
| KORA-F3                             | 1476               | 61.8 $\pm$ 10.0           | 49.9%       | 967.2 $\pm$ 162.3              | 404.3 $\pm$ 30.5               | 411.1 $\pm$ 24                               | 19.3                                         |
| KORA-S4                             | 1736               | 53.8 $\pm$ 8.8            | 42.0%       | 940.7 $\pm$ 146.4              | 408.7 $\pm$ 26.7               | 421.4 $\pm$ 19.6                             | 19.1                                         |
| LifeLines                           | 3145               | 54.9 $\pm$ 9.7            | 39.5%       | 900.1 $\pm$ 146.3              | 395.7 $\pm$ 27.4               | 419.3 $\pm$ 20.7                             | 16.2                                         |
| MICROS                              | 1013               | 45.7 $\pm$ 16.3           | 42.1%       | 900.4 $\pm$ 148.5              | 398.0 $\pm$ 28.6               | 416.8 $\pm$ 24.3                             | 15.5                                         |
| ORCADES                             | 672                | 53.6 $\pm$ 15.1           | 46.6%       | 1009.2 $\pm$ ( 155.4 )         | 410.2 $\pm$ (29.6)             | 413.0 $\pm$ (0.8)                            | 20.8                                         |
| PopGen                              | 983                | 53.5 $\pm$ 14.2           | 54.1%       | 944.1 $\pm$ 154.7              | 402.9 $\pm$ 31.7               | 416.8 $\pm$ 24.3                             | 21.7                                         |
| PREVEND_GWAS                        | 3608               | 49.1 $\pm$ 12.3           | 49.2%       | 897.4 $\pm$ 153.0              | 396.3 $\pm$ 27.2               | 421.1 $\pm$ 23.1                             | 17.2                                         |
| RS-I                                | 4606               | 68.6 $\pm$ 8.5            | 40.3%       | 880.4 $\pm$ 147.4              | 398.4 $\pm$ 28.8               | 426.7 $\pm$ 22.8                             | 17.9                                         |
| RS-II                               | 1479               | 64.9 $\pm$ 7.5            | 44.3%       | 887.1 $\pm$ 137.5              | 402.8 $\pm$ 27.3               | 429.4 $\pm$ 21.8                             | 17.3                                         |
| SardinIA - GWAS                     | 4266               | 43.6 $\pm$ 17.6           | 43.6%       | 922.1 $\pm$ 152.8              | 370.9 $\pm$ 34.3               | 388.1 $\pm$ 26.4                             | 23.5                                         |
| SHIP                                | 3221               | 48.6 $\pm$ 15.7           | 47.5%       | 854.7 $\pm$ 148.1              | 393.6 $\pm$ 28.6               | 429.0 $\pm$ 31.7                             | 22.5                                         |
| TwinsUK                             | 2838               | 51.7 $\pm$ 12.5           | 4.5%        | 922.3 $\pm$ 142.8              | 402.2 $\pm$ 28.0               | 420.8 $\pm$ 20.9                             | 16.4                                         |
| Young Finns Study                   | 1081               | 31 (4.9)                  | 48.8%       | 912 (141.5)                    | 351.2 (26.2)                   | 370.2 (23.7)                                 | 16.9                                         |
| <b>1b: Metabochip replication</b>   |                    |                           |             |                                |                                |                                              |                                              |
| PIVUS                               | 833                | 70.2 $\pm$ 0.2            | 48.1%       | 983.8 $\pm$ 136.5              | 394.0 $\pm$ 30.9               | 398.6 $\pm$ 23.0                             | 21.3                                         |
| ULSAM                               | 521                | 76.5 $\pm$ 5.1            | 100.0%      | 959.9 $\pm$ 158.7              | 411.8 $\pm$ 34.8               | 422.7 $\pm$ 28.2                             | 24.8                                         |
| <b>1c: Targeted SNP replication</b> |                    |                           |             |                                |                                |                                              |                                              |
| BRHS                                | 3402               | 68.4 $\pm$ 5.4            | 100.0%      | 948.8 $\pm$ 172.0              | 408.5 $\pm$ 35.6               | 418.3 $\pm$ 24.8                             | 23.7                                         |
| Bruneck                             | 629                | 61.0 $\pm$ 10.6           | 52.0%       | 872.6 $\pm$ 139.8              | 381.8 $\pm$ 28.7               | 410.7 $\pm$ 21.6                             | 22.5                                         |
| Carla                               | 1551               | 63.3 $\pm$ 9.8            | 53.1%       | 943.1 $\pm$ 148.5              | 411.2 $\pm$ 30.7               | 425.5 $\pm$ 22.4                             | 19.0                                         |
| Cyprus                              | 804                | 59.6 $\pm$ 10.2           | 45.6%       | 909.4 $\pm$ 147.9              | 399.1 $\pm$ 28.5               | 413.0 $\pm$ 17.4                             | 20.4                                         |
| Czech Post-MONICA                   | 289                | 56.4 $\pm$ 10.3           | 46.7%       | 928.8 $\pm$ 123.5              | 409.5 $\pm$ 25.8               | 427.1 $\pm$ 31.7                             | 22.6                                         |
| Galicía                             | 797                | 53.75 $\pm$ 18.6          | 51.4%       | 932.7 $\pm$ 153.0              | 395.09 $\pm$ 33.3              | 409.8 $\pm$ 27.2                             | 18.0                                         |
| Health2000 - targeted               | 3128               | 52.3 $\pm$ 15.9           | 42.9%       | 973.4 $\pm$ 160.6              | 389.4 $\pm$ 30.0               | 396.8 $\pm$ 22.6                             | 18.9                                         |
| HNR - targeted                      | 4109               | 59.7 $\pm$ 7.8            | 48.7%       | 887.1 $\pm$ 140.6              | 390.3 $\pm$ 31.6               | 416.1 $\pm$ 18.4                             | 16.0                                         |
| Intergene                           | 2779               | 50.6 $\pm$ 30.5           | 45.7%       | 997.1 $\pm$ 158.2              | 411.6 $\pm$ 30.6               | 414.3 $\pm$ 23.9                             | 19.9                                         |
| KORA-F3 - targeted                  | 908                | 51.3 $\pm$ 12.3           | 45.8%       | 955.6 $\pm$ 161.2              | 397.3 $\pm$ 28.4               | 404.7 $\pm$ 18.3                             | 18.0                                         |
| KORA-S4 - targeted                  | 2168               | 45.1 $\pm$ 15.6           | 49.3%       | 938.4 $\pm$ 155.0              | 405.7 $\pm$ 28.3               | 419.0 $\pm$ 21.3                             | 19.1                                         |
| MIDSPAN Family Study                | 2107               | 45.1 $\pm$ 6.2            | 44.6%       | 898.3 $\pm$ 149.02             | 391.9 $\pm$ 28.9               | 407.5 $\pm$ 21.0                             | 19.9                                         |
| PREVEND_replication                 | 3865               | 48 $\pm$ 12.8             | 46.6%       | 897.7 $\pm$ 161.0              | 396.6 $\pm$ 28.62              | 421.5 $\pm$ 23.0                             | 17.2                                         |
| SAPHIR                              | 1288               | 50.7 $\pm$ 5.95           | 69.5%       | 938.4 $\pm$ 155.0              | 405.7 $\pm$ 29.2               | 404.8 $\pm$ 27.1                             | 19.4                                         |
| Whitehall-II                        | 4138               | 43.7 $\pm$ 5.9            | 75.8%       | 963.5 $\pm$ 161.1              | 395.3 $\pm$ 32.5               | 402.6 $\pm$ 25.0                             | 23.3                                         |

Supplementary Table 1: Clinical characteristics of GWAS, replication cohorts. Shown are the distribution of age, sex, RR and QT interval, by cohort for GWAS (1a) and replication (1b, 1c) samples. In addition, we show the Bazett's heart-rate corrected QT interval (QTc), which is used clinically but not in the current analysis. For comparison, we show the standard deviation of QT interval residuals after linear regression to adjust for the effects of age, sex and RR interval. Continuous measures are shown as mean  $\pm$  SD, while categorical traits are shown as percentages.



|                         | Platform                                       | Calling algorithm  | call rate filter       | MAF filter                | pHWE filter              | Mendelian check         |
|-------------------------|------------------------------------------------|--------------------|------------------------|---------------------------|--------------------------|-------------------------|
| <b>2a: GWAS cohorts</b> |                                                |                    |                        |                           |                          |                         |
| AGES                    | Illumina HH 370 CNV                            | Bead Studio        | call rate <95%         | MAF < 1%                  | pHWE < 10-5              |                         |
| Amish studies           | Affymetrix 500k and 6.0                        | BRLMM              | call rate < 95%        | MAF < 1%                  | pHWE < 10-6              |                         |
| ARIC                    | Affymetrix 6.0                                 | Birdseed           | call rate <95%         | MAF < 1%                  | pHWE < 10-5              |                         |
| BLSA                    | Illumina 550 K                                 | Bead Studio        | call rate <97%         | MAF <1%                   | pHWE <10-4               |                         |
| BRIGHT                  | Affymetrix                                     | CHIAMO             | call rate <98%         | none                      | pHWE < 5.7x10-7          |                         |
| Carlantino              | Illumina HH 370 CNV                            | Bead Studio        | call rate <97%         | MAF <1%                   | pHWE < 10-6              |                         |
| CHS                     | Illumina HH 370 CNV                            | Bead Studio        | call rate <95%         | At least one heterozygote | pHWE < 10-5              | > 2 duplicate errors or |
| Croatia - Korcula       | Illumina HH 370 CNV                            | BeadStudio         | call rate <98%         | MAF < 1%                  | pHWE < 10-6              |                         |
| Croatia-Split           | Illumina HH 370 CNV                            | BeadStudio         | call rate <98%         | MAF < 1%                  | pHWE < 10-6              |                         |
| DCCT/EDIC               | Illumina 1M                                    | Bead Studio        | call rate <95%         | MAF < 1%                  | pHWE < 10-6              |                         |
| deCODE                  | Illumina HH 300, HH 300 Duo, HH610, 1M, 1Mduo  | Bead Studio        | call rate <95%         | MAF < 1%                  | pHWE < 0.001 in controls |                         |
| eMERGE                  | Illumina 660W-Quadv1_A                         | BeadStudio         | call rate <99%         | MAF < 0.1%                | pHWE <10-4 (flagged)     | excess Mendelian Inco   |
| ERF                     | Illumina HH 300v2/370CNV                       | BeadStudio         | call rate <95%         | MAF < 1%                  | pHWE < 10 <sup>-5</sup>  |                         |
| FHS                     | Affymetrix 500k + 50K Human Gene Focused Panel | BRLMM              | call rate <95%         | MAF < 1%                  | pHWE < 10-6              |                         |
| FVG Genetic Park        | Illumina HH 370 CNV                            | Bead Studio        | call rate <97%         | MAF <1%                   | pHWE < 10-6              |                         |
| Health2000              | Illumina 610                                   | Bead Studio        | call rate < 95%        | MAF < 2%                  | pHWE < 10-4              |                         |
| HealthABC               | Illumina 1M Duo                                | BeadStudio         | call rate <97%         | MAF < 1%                  | pHWE < 10-6              |                         |
| HNR                     | Illumina HH 550v3                              | BeadStudio         | call rate <98%         | MAF < 5%                  | pHWE < 10-5              |                         |
| KORA-F3                 | Affymetrix 500k                                | BRLMM              | call rate <93%         | MAF < 5%                  | pHWE < 10-5              |                         |
| KORA-S4                 | Affymetrix 6.0                                 | Birdseed           | call rate <93%         | none                      | none                     |                         |
| LifeLines               | Illumina CytoSNP12 v2                          | GenomeStudio       | call rate <95%         | MAF < 1%                  | pHWE < 10-5              |                         |
| MICROS                  | Illumina HH 300v2                              | BeadStudio         | call rate <98%         | MAF < 5%                  | pHWE < 10-5              |                         |
| ORCADES                 | Illumina HH 300v2/370CNV                       | BeadStudio         | call rate <95%         | MAF < 1%                  | pHWE < 10 <sup>-5</sup>  |                         |
| PopGen                  | Affymetrix 6.0                                 | Birdseed V2        | call rate <95%         | MAF < 1%                  | pHWE < 10 <sup>-4</sup>  |                         |
| PREVEND_GWAS            | CytoSNP12-v2                                   | Illumina algorithm | call rate <98%         | MAF < 1%                  | pHWE < 10-5              |                         |
| RS-I                    | Illumina HH 550                                | BeadStudio         | call rate <98%         | MAF < 1%                  | pHWE < 10-6              |                         |
| RS-II                   | Illumina HH 550                                | BeadStudio         | call rate <98%         | MAF < 1%                  | pHWE < 10-6              |                         |
| SardinIA                | Affymetrix 500k, Affymetrix 10K                | BRLMM              | call rate <90%         | MAF < 5%                  | pHWE < 10-6              | excess Mendelian Inco   |
| SHIP                    | Affymetrix 6.0                                 | Birdseed V2        | QC call rate < 86% eac | none                      | none                     |                         |
| TwinsUK                 | Illumina HH300 HH 300 Duo, HH550, HH610        | Illuminus          | Call rate <95%         | MAF<1%                    | HWE p<10-4               |                         |
| Young Finns Study       | Illumina 670k custom chip                      | Illuminus          | Call rate < 95%        | MAF < 1%                  | pHWE < 10-6              |                         |

**2b: Metabochip replication cohorts**

|       |                     |                  |                |  |             |  |
|-------|---------------------|------------------|----------------|--|-------------|--|
| PIVUS | Illumina Metabochip | Illumina GenCall | Call rate <90% |  | pHWE < 10-5 |  |
| ULSAM | Illumina Metabochip | Illumina GenCall | Call rate <90% |  | pHWE < 10-5 |  |

**2c: Replication cohorts**

|                       | Platform | call rate filter | HWEp filter |
|-----------------------|----------|------------------|-------------|
| BRHS                  | Kaspar   | <95%             | p<0.001     |
| Bruneck               | Sequenom | <95%             | p<0.001     |
| Carla                 | Taqman   | <95%             | p<0.001     |
| Cyprus                | Sequenom | <95%             | p<0.001     |
| Czech Post-MONICA     | Sequenom | <95%             | p<0.001     |
| Galicia               | Sequenom | <95%             | p<0.001     |
| Health2000 - targeted | Sequenom | <95%             | p<0.001     |
| HNR - targeted        | Sequenom | <95%             | p<0.001     |
| Intergene             | Kaspar   | <95%             | p<0.001     |
| KORA-F3 - targeted    | Sequenom | <95%             | p<0.001     |
| KORA-S4 - targeted    | Sequenom | <95%             | p<0.001     |
| MIDSPAN Family Study  | Taqman   | <95%             | p<0.001     |
| PREVEND_replication   | Kaspar   | <95%             | p<0.001     |
| SAPHIR                | Sequenom | <95%             | p<0.001     |
| Whitehall-II          | Kaspar   | <95%             | p<0.001     |
| Young Finns           | Taqman   | <95%             | p<0.001     |

Supplementary Table 2 (2 pages): Genotyping and imputation methods. Shown are the details of the genotyping platform and quality control filters applied at individual cohorts for GWAS (2a) and replication (2b, 2c) samples.

| Imputation    | Imputation Backbone / GWAS Statistical Analysis Software used |                                                   |
|---------------|---------------------------------------------------------------|---------------------------------------------------|
| Mach1 v1.0.15 | from build 35                                                 | plink                                             |
| Mach1v1.0.15  | from build 35                                                 | MMAP                                              |
| Mach1 v1.0.16 | from build 35                                                 | Mach2QTL + plink                                  |
| Mach          | from build 35                                                 | Merlin offline                                    |
| IMPUTE        | from build 36                                                 | SNPTEST v 1.1.5                                   |
| Mach1         | from build 36                                                 | GenABEL + ProbABEL                                |
| Bimbam        | from build 36                                                 | R                                                 |
| Mach1 v1.0.15 | from build 36                                                 | GenABEL + ProbABEL                                |
| Mach1 v1.0.15 | from build 36                                                 | GenABEL + ProbABEL                                |
| Mach1 v1.0.15 | from build 36                                                 | Mach2QTL + plink                                  |
| IMPUTE v2     | from build 36                                                 | deCODE software similar to SNPTEST                |
| IMPUTE        | from build 36                                                 | plink and PLATO                                   |
| Mach1 v1.0.15 | from build 35                                                 | Mach2QTL + plink + GenABEL                        |
| Mach1 v1.0.15 | from build 36                                                 | LMEKIN                                            |
| Mach1         | from build 36                                                 | GenABEL, ProbABEL                                 |
| Mach1 v1.0.10 | from build 35                                                 | plink                                             |
| Mach1 v1.0.16 | from build 36                                                 | R                                                 |
| Mach1 v1.0.10 | from build 35                                                 | Mach2QTL + plink                                  |
| Mach1 v1.0.10 | from build 35                                                 | Mach2QTL + plink                                  |
| Mach1 v1.0.16 | from build 36                                                 | Mach2QTL + plink                                  |
| IMPUTE v0.3.2 | from build 36                                                 | SNPTEST v1.1.4                                    |
| Mach1 v1.0.10 | from build 35                                                 | Merlin (--fastassoc)                              |
| Mach1 v1.0.15 | from build 35                                                 | Mach2QTL + GenABEL                                |
| Mach1 v1.0.16 | from build 36                                                 | Mach2QTL + plink                                  |
| BEAGLE v3.2   | Hapmap II CEU r23a                                            | Mach2QTL + plink                                  |
| Mach1 v1.0.15 | from build 35                                                 | Mach2QTL                                          |
| Mach1 v1.0.10 | from build 36                                                 | Mach2QTL as implemented in GRIMP (PMID: 19700477) |
| Mach1 v1.0.10 | from build 35                                                 | Merlin                                            |
| Impute v0.5.0 | from build 36                                                 | SNPTEST v1.1.5                                    |
| IMPUTE v0.3.2 | from build 36                                                 | SNPTEST v1.1.4                                    |
| Mach1 v1.0    | from build 36                                                 | Plink + ProbABEL                                  |
| IMPUTE v2     | from build 36                                                 | plink                                             |
| IMPUTE v2     | from build 36                                                 | plink                                             |

| GWAS Cohort     | Sample size   | Allele frequency exclusion | Imputation quality exclusion | Genomic control lambda after QC |
|-----------------|---------------|----------------------------|------------------------------|---------------------------------|
| AGES            | 2522          | NA                         | NA                           | 1.04                            |
| Amish Studies   | 1124          | <0.01 or >0.99             | NA                           | 1.05                            |
| ARIC            | 8524          | NA                         | NA                           | 1.01                            |
| BLSA            | 477           | NA                         | NA                           | 1.04                            |
| BRIGHT          | 1392          | NA                         | NA                           | 0.99                            |
| CARLANTINO      | 383           | NA                         | NA                           | 0.99                            |
| CHS             | 2457          | NA                         | NA                           | 1.02                            |
| Croatia-Korcula | 363           | NA                         | NA                           | 0.96                            |
| Croatia-Split   | 365           | NA                         | NA                           | 0.96                            |
| DCCT-EDIC       | 1118          | NA                         | NA                           | 1.03                            |
| DECODE          | 8961          | NA                         | NA                           | 1.09                            |
| EMERGE          | 5272          | NA                         | NA                           | 1.05                            |
| ERF             | 1481          | NA                         | NA                           | 1.03                            |
| FHS             | 7429          | NA                         | NA                           | 1.03                            |
| FVG             | 497           | NA                         | NA                           | 0.98                            |
| HEALTH ABC      | 1305          | <0.04 or >0.96             | <0.8                         | 1.01                            |
| HEALTH2000      | 1921          | NA                         | NA                           | 1.04                            |
| HNR             | 346           | NA                         | NA                           | 1.00                            |
| KORA-F3         | 1476          | NA                         | NA                           | 0.99                            |
| KORA-S4         | 1736          | NA                         | NA                           | 1.01                            |
| LIFELINES       | 3145          | <0.01 or >0.99             | <0.3                         | 1.01                            |
| MICROS          | 1013          | NA                         | NA                           | 0.99                            |
| ORCADES         | 672           | <0.01 or >0.99             | <0.5                         | 0.99                            |
| POPGEN          | 983           | NA                         | NA                           | 1.00                            |
| PREVEND         | 3608          | NA                         | NA                           | 1.05                            |
| RS-I            | 4606          | NA                         | NA                           | 1.02                            |
| RS-II           | 1479          | <0.01 or >0.99             | NA                           | 1.01                            |
| SARDINIA        | 4266          | NA                         | NA                           | 1.04                            |
| SHIP            | 3221          | <0.01 or >0.99             | <0.1                         | 1.01                            |
| TWINS           | 2838          | NA                         | NA                           | 1.04                            |
| YOUNGFINNS      | 1081          | NA                         | NA                           | 1.00                            |
| <b>TOTAL</b>    | <b>76,061</b> |                            |                              |                                 |

\*QC steps for all cohorts: (1) Beta < 100,000, (2) no NA values, (3) allele frequency > 0 and < 1, (4) imputation quality > 1.1

Supplementary Table 3: GWAS quality control. Shown are any filters applied centrally to GWAS results to ensure approximately null distributions based on  $\lambda_{GC}$  and quantile-quantile plots.

Supplementary Table 4: MetaboChip QT replication + finemapping SNP content. Provided as a separate Excel file at Nature Genetics website.

**ST5a: Signal finemapping**

| TRAIT | RS         | CHR | POS         | locus         | P_GWAS_REPLIC | GRADE  |
|-------|------------|-----|-------------|---------------|---------------|--------|
| QT    | rs12143842 | 1   | 160,300,514 | NOS1AP        | 1.95E-123     | GOLD   |
| QT    | rs11153730 | 6   | 118,774,215 | PLN           | 1.10E-38      | GOLD   |
| QT    | rs37060    | 16  | 57,123,805  | CNOT1         | 1.82E-38      | GOLD   |
| QT    | rs2074239  | 11  | 2,441,668   | KCNQ1         | 5.34E-30      | GOLD   |
| QT    | rs2968863  | 7   | 150,254,070 | KCNH2         | 6.51E-24      | GOLD   |
| QT    | rs846111   | 1   | 6,201,957   | RNF207/KCNAB2 | 1.34E-22      | GOLD   |
| QT    | rs10919070 | 1   | 167,365,661 | ATP1B1        | 2.42E-20      | GOLD   |
| QT    | rs8049607  | 16  | 11,599,254  | LITAF         | 3.04E-19      | GOLD   |
| QT    | rs1396515  | 17  | 65,942,588  | KCNJ2         | 2.22E-18      | GOLD   |
| QT    | rs6793245  | 3   | 38,574,041  | SCN5A         | 7.64E-16      | GOLD   |
| QT    | rs3135967  | 17  | 30,337,842  | LIG3          | 1.56E-14      | GOLD   |
| QT    | rs2298632  | 1   | 23,583,062  | TCEA3         | 9.10E-14      | BRONZE |
| QT    | rs9303504  | 17  | 61,745,828  | PRKCA         | 1.08E-10      | GOLD   |
| QT    | rs246185   | 16  | 14,302,933  | MKL2          | 1.54E-10      | SILVER |
| QT    | rs2414059  | 15  | 48,660,636  | TRPM7         | 2.43E-10      | GOLD   |
| QT    | rs295140   | 2   | 200,868,944 | LOC26010      | 4.10E-10      | BRONZE |
| QT    | rs938291   | 2   | 174,450,854 | SP3           | 6.02E-10      | SILVER |
| QT    | rs7195486  | 16  | 4,195,181   | SRL           | 1.15E-09      | GOLD   |
| QT    | rs9920     | 7   | 115,987,328 | CAV1          | 3.37E-09      | GOLD   |
| QT    | rs11685090 | 2   | 40,217,710  | SLC8A1        | 5.58E-09      | GOLD   |
| QT    | rs3026445  | 12  | 109,207,586 | ATP2A2        | 8.65E-09      | GOLD   |
| QT    | rs174583   | 11  | 61,366,326  | FADS1,2,3     | 1.39E-08      | BRONZE |
| QT    | rs4452774  | 8   | 98,930,532  | LAPTM4B       | 1.55E-08      | SILVER |
| QT    | rs1805128  | 21  | 34,743,550  | KCNE1         | 2.28E-08      | GOLD   |
| QT    | rs1961102  | 8   | 104,002,021 | AZIN1         | 2.68E-08      | BRONZE |
| QT    | rs7561149  | 2   | 179,398,101 | TTN           | 3.96E-08      | SILVER |

**ST5b: Locus finemapping**

| TRAIT | INDEX_SNP  | CHR | START_HG18  | END_HG18    | LOCUS_GENE   | RATIONALE                                                    | GRADE  |
|-------|------------|-----|-------------|-------------|--------------|--------------------------------------------------------------|--------|
| QT    | rs12143842 | 1   | 160,219,639 | 160,705,617 | NOS1AP       | multiple independent signals; strongest effects in genome    | GOLD   |
| QT    | rs11153730 | 6   | 118,534,954 | 119,189,214 | PLN          | multiple independent signals; multiple cardiovascular traits | SILVER |
| QT    | rs6793245  | 3   | 38,488,369  | 38,820,319  | SCN5A_SCN10A | multiple cardiovascular traits                               | BRONZE |
| QT    | rs2074239  | 11  | 2,419,260   | 2,846,916   | KCNQ1        | multiple independent signals; multiple traits                | backup |

Supplementary Table 5: Metabochip finemapping targets. Shown are the loci selected for finemapping on the Metabochip array. Loci were selected to follow up a specific signal of association (signal finemapping) on the basis of linkage disequilibrium and for a few loci an entire region defined by physical distance on the basis of at least one signal of association and a span defined by a combination of physical and genetic difference. Loci were prioritized on the basis of consensus regarding strength of association and in some cases biologic plausibility as high (GOLD), moderate (SILVER) and lower (BRONZE) priority.

| SNP        | LOCUS | NEAREST_GENE | Function       | CHR | POS         | INDEX  | OTHER | NOVEL? | REPLIC_SNP? | CODED  | NONCODED |
|------------|-------|--------------|----------------|-----|-------------|--------|-------|--------|-------------|--------|----------|
|            |       |              |                |     |             | SIGNAL |       |        |             | ALLELE | ALLELE   |
| rs846111   | 1     | RNF207       | NON_SYNONYMOUS | 1   | 6,201,957   | INDEX  |       | KNOWN  |             | C      | G        |
| rs2298632  | 2     | TCEA3        | INTRONIC       | 1   | 23,583,062  | INDEX  |       | NOVEL  | REPLIC      | T      | C        |
| rs12143842 | 3     | NOS1AP       | INTERGENIC     | 1   | 160,300,514 | INDEX  |       | KNOWN  |             | T      | C        |
| rs10919070 | 4     | ATP1B1       | INTRONIC       | 1   | 167,365,661 | INDEX  |       | KNOWN  |             | C      | A        |
| rs12997023 | 5     | SLC8A1       | INTERGENIC     | 2   | 40,606,486  | INDEX  |       | KNOWN  |             | C      | T        |
| rs938291   | 6     | SP3          | INTERGENIC     | 2   | 174,450,854 | INDEX  |       | NOVEL  | REPLIC      | G      | C        |
| rs7561149  | 7     | TTN-CCDC141  | INTERGENIC     | 2   | 179,398,101 | INDEX  |       | NOVEL  | REPLIC      | C      | T        |
| rs295140   | 8     | SPATS2L      | INTERGENIC     | 2   | 200,868,944 | INDEX  |       | NOVEL  | REPLIC      | T      | C        |
| rs6793245  | 9     | SCN5A-SCN10A | INTRONIC       | 3   | 38,574,041  | INDEX  |       | KNOWN  |             | A      | G        |
| rs17784882 | 10    | C3ORF75      | INTRONIC       | 3   | 47,519,007  | INDEX  |       | NOVEL  |             | A      | C        |
| rs2363719  | 11    | SLC4A4       | INTRONIC       | 4   | 72,357,080  | INDEX  |       | NOVEL  |             | A      | G        |
| rs3857067  | 12    | SMARCAD1     | INTERGENIC     | 4   | 95,245,457  | INDEX  |       | NOVEL  | REPLIC      | A      | T        |
| rs10040989 | 13    | GFRA3        | INTERGENIC     | 5   | 137,601,624 | INDEX  |       | NOVEL  | REPLIC      | A      | G        |
| rs7765828  | 14    | GMPR         | INTRONIC       | 6   | 16,402,701  | INDEX  |       | NOVEL  | REPLIC      | G      | C        |
| rs11153730 | 15    | SLC35F1-PLN  | INTERGENIC     | 6   | 118,774,215 | INDEX  |       | KNOWN  |             | T      | C        |
| rs9920     | 16    | CAV1         | 3PRIME_UTR     | 7   | 115,987,328 | INDEX  |       | NOVEL  | REPLIC      | C      | T        |
| rs2072413  | 17    | KCNH2        | INTRONIC       | 7   | 150,278,902 | INDEX  |       | KNOWN  |             | T      | C        |
| rs16936870 | 18    | NCOA2        | INTRONIC       | 8   | 71,351,896  | INDEX  |       | NOVEL  |             | A      | T        |
| rs11779860 | 19    | LAPTM4B      | INTRONIC       | 8   | 98,919,506  | INDEX  |       | NOVEL  |             | C      | T        |
| rs1961102  | 20    | AZIN1        | INTERGENIC     | 8   | 104,002,021 | INDEX  |       | NOVEL  | REPLIC      | T      | C        |
| rs2485376  | 21    | GBF1         | INTRONIC       | 10  | 104,039,996 | INDEX  |       | NOVEL  |             | A      | G        |
| rs7122937  | 22    | KCNQ1        | INTRONIC       | 11  | 2,443,126   | INDEX  |       | KNOWN  |             | T      | C        |
| rs174583   | 23    | FADS2        | INTRONIC       | 11  | 61,366,326  | INDEX  |       | NOVEL  | REPLIC      | T      | C        |
| rs3026445  | 24    | ATP2A2       | INTRONIC       | 12  | 109,207,586 | INDEX  |       | NOVEL  | REPLIC      | C      | T        |
| rs728926   | 25    | KLF12        | INTRONIC       | 13  | 73,411,123  | INDEX  |       | NOVEL  |             | T      | C        |
| rs2273905  | 26    | ANKRD9       | 5PRIME_UTR     | 14  | 102,044,752 | INDEX  |       | NOVEL  | REPLIC      | T      | C        |
| rs3105593  | 27    | USP50-TRPM7  | INTERGENIC     | 15  | 48,632,310  | INDEX  |       | NOVEL  |             | T      | C        |
| rs1296720  | 28    | CREBBP       | INTRONIC       | 16  | 3,813,643   | INDEX  |       | NOVEL  |             | C      | A        |
| rs735951   | 29    | LITAF        | INTERGENIC     | 16  | 11,601,037  | INDEX  |       | NOVEL  |             | A      | G        |
| rs246185   | 30    | MKL2         | INTERGENIC     | 16  | 14,302,933  | INDEX  |       | NOVEL  | REPLIC      | C      | T        |
| rs246196   | 31    | CNOT1        | INTRONIC       | 16  | 57,131,754  | INDEX  |       | KNOWN  |             | C      | T        |
| rs1052536  | 32    | LIG3         | 3PRIME_UTR     | 17  | 30,355,688  | INDEX  |       | KNOWN  |             | C      | T        |
| rs9892651  | 33    | PRKCA        | INTRONIC       | 17  | 61,734,255  | INDEX  |       | KNOWN  |             | C      | T        |
| rs1396515  | 34    | KCNJ2        | INTERGENIC     | 17  | 65,942,588  | INDEX  |       | KNOWN  |             | C      | G        |
| rs1805128  | 35    | KCNE1        | NON_SYNONYMOUS | 21  | 34,743,550  | INDEX  |       | KNOWN  |             | T      | C        |

Supplementary Table 6 (2 pages): 35 genome-wide significant loci associated with QT interval. Shown are the 35 loci with at least one SNP that achieves genome-wide significance on the basis of GWAS and/or replication results. The sentinel (or index) SNP with the lowest p-value from GWAS or GWAS+replication is shown along with annotation of the function of the SNP if falling within a gene, whether the association of the locus is known or novel, whether the top SNP at the locus was selected for replication genotyping, the allele coded 0,1,2 under an additive genetic model, the frequency of the coded allele (weighted average across all studies), the effective sample size (representing the per-SNP sum of per cohort products of samples size and imputation quality [ranging from 0 to 1] for each SNP) and the QT interval effect estimate (beta from linear regression on the scale of milliseconds), the P-value resulting from inverse-variance-weighted fixed-effects meta-analysis and lastly a representation across all GWAS and replication cohorts for whether the effect on QT interval for the coded allele was negative (-), positive (+) or missing (.).





| SNP        | LOCUS | NEAREST_GENE | FUNCTION       | CHR | POS         | INDEX_OTHERSIGNAL | NOVEL? | REPLIC SNP? | Coded/<br>Noncoded |         | N_EFF | BETA FIXED | SE_FIXED | P_FIXED |
|------------|-------|--------------|----------------|-----|-------------|-------------------|--------|-------------|--------------------|---------|-------|------------|----------|---------|
|            |       |              |                |     |             |                   |        |             | /                  | codfreq |       |            |          |         |
| rs2273042  | 1     | RNF207       | INTRONIC       | 1   | 6,071,709   | OTHERSIGNAL       | KNOWN  |             | A/G/0.11           | 66,377  | 0.94  | 0.16       | 6.8E-09  |         |
| rs846111   | 1     | RNF207       | NON_SYNONYMOUS | 1   | 6,201,957   | INDEX             | KNOWN  |             | C/G/0.283          | 47,041  | 1.73  | 0.13       | 7.4E-40  |         |
| rs2298632  | 2     | TCEA3        | INTRONIC       | 1   | 23,583,062  | INDEX             | NOVEL  | REPLIC      | T/C/0.496          | 83,031  | 0.70  | 0.09       | 1.4E-14  |         |
| rs6669543  | 3     | NOS1AP       | INTRONIC       | 1   | 160,247,649 | OTHERSIGNAL       | KNOWN  |             | T/C/0.258          | 73,090  | 1.46  | 0.11       | 1.6E-39  |         |
| rs4656345  | 3     | NOS1AP       | INTRONIC       | 1   | 160,257,861 | OTHERSIGNAL       | KNOWN  |             | A/G/0.085          | 12,469  | -4.73 | 0.52       | 1.0E-19  |         |
| rs12143842 | 3     | NOS1AP       | INTERGENIC     | 1   | 160,300,514 | INDEX             | KNOWN  |             | T/C/0.24           | 75,033  | 3.50  | 0.11       | 1.3E-213 |         |
| rs16857031 | 3     | NOS1AP       | INTRONIC       | 1   | 160,379,534 | OTHERSIGNAL       | KNOWN  |             | G/C/0.132          | 71,270  | 2.37  | 0.14       | 6.5E-61  |         |
| rs17457880 | 3     | NOS1AP       | INTRONIC       | 1   | 160,434,778 | OTHERSIGNAL       | KNOWN  |             | A/G/0.055          | 34,636  | -1.90 | 0.30       | 2.8E-10  |         |
| rs4657172  | 3     | NOS1AP       | INTRONIC       | 1   | 160,446,256 | OTHERSIGNAL       | KNOWN  |             | C/G/0.125          | 76,568  | -0.81 | 0.14       | 1.3E-08  |         |
| rs3934467  | 3     | NOS1AP       | INTRONIC       | 1   | 160,449,301 | OTHERSIGNAL       | KNOWN  |             | T/C/0.222          | 76,877  | 2.74  | 0.11       | 2.8E-129 |         |
| rs7545047  | 3     | NOS1AP       | INTRONIC       | 1   | 160,457,727 | OTHERSIGNAL       | KNOWN  |             | A/G/0.049          | 63,238  | -1.78 | 0.24       | 8.9E-14  |         |
| rs17460657 | 3     | NOS1AP       | INTRONIC       | 1   | 160,528,450 | OTHERSIGNAL       | KNOWN  |             | C/A/0.045          | 14,788  | -4.60 | 0.56       | 2.7E-16  |         |
| rs347272   | 3     | NOS1AP       | INTRONIC       | 1   | 160,585,122 | OTHERSIGNAL       | KNOWN  |             | A/G/0.132          | 72,910  | 1.80  | 0.14       | 1.3E-37  |         |
| rs164133   | 3     | NOS1AP       | INTRONIC       | 1   | 160,647,912 | OTHERSIGNAL       | KNOWN  |             | C/G/0.264          | 75,936  | 0.72  | 0.11       | 3.0E-11  |         |
| rs545833   | 4     | ATP1B1       | INTRONIC       | 1   | 166,956,564 | OTHERSIGNAL       | KNOWN  |             | T/C/0.266          | 77,162  | 0.90  | 0.11       | 3.9E-17  |         |
| rs12061601 | 4     | ATP1B1       | UPSTREAM       | 1   | 167,337,074 | OTHERSIGNAL       | KNOWN  |             | C/T/0.117          | 74,396  | -1.41 | 0.15       | 3.1E-21  |         |
| rs10919070 | 4     | ATP1B1       | INTRONIC       | 1   | 167,365,661 | INDEX             | KNOWN  |             | C/A/0.126          | 75,707  | -1.68 | 0.14       | 1.1E-31  |         |
| rs12079745 | 4     | ATP1B1       | 3PRIME_UTR     | 1   | 167,367,684 | OTHERSIGNAL       | KNOWN  |             | A/G/0.059          | 69,214  | -1.34 | 0.21       | 1.2E-10  |         |
| rs1983546  | 4     | ATP1B1       | INTRONIC       | 1   | 167,712,807 | OTHERSIGNAL       | KNOWN  |             | G/A/0.348          | 75,124  | -0.81 | 0.10       | 9.7E-16  |         |
| rs6544311  | 5     | SLC8A1       | INTRONIC       | 2   | 40,206,781  | OTHERSIGNAL       | KNOWN  |             | A/C/0.376          | 71,452  | 0.65  | 0.10       | 1.8E-10  |         |
| rs12997023 | 5     | SLC8A1       | INTERGENIC     | 2   | 40,606,486  | INDEX             | KNOWN  |             | C/T/0.049          | 70,311  | -1.69 | 0.22       | 4.7E-14  |         |
| rs938291   | 6     | SP3          | INTERGENIC     | 2   | 174,450,854 | INDEX             | NOVEL  | REPLIC      | G/C/0.39           | 101,902 | 0.53  | 0.09       | 5.9E-10  |         |
| rs7561149  | 7     | TTN-CCDC141  | INTERGENIC     | 2   | 179,398,101 | INDEX             | NOVEL  | REPLIC      | C/T/0.42           | 85,299  | -0.52 | 0.09       | 7.1E-09  |         |
| rs295140   | 8     | SPATS2L      | INTERGENIC     | 2   | 200,868,944 | INDEX             | NOVEL  | REPLIC      | T/C/0.423          | 103,331 | 0.61  | 0.08       | 4.4E-13  |         |
| rs6793245  | 9     | SCNSA-SCN10A | INTRONIC       | 3   | 38,574,041  | INDEX             | KNOWN  |             | A/G/0.317          | 73,697  | -1.12 | 0.10       | 4.4E-27  |         |
| rs11708996 | 9     | SCNSA-SCN10A | INTRONIC       | 3   | 38,608,927  | OTHERSIGNAL       | KNOWN  |             | C/G/0.148          | 69,500  | -0.92 | 0.14       | 2.3E-11  |         |
| rs11710077 | 9     | SCNSA-SCN10A | INTRONIC       | 3   | 38,632,903  | OTHERSIGNAL       | KNOWN  |             | T/A/0.209          | 66,926  | 0.92  | 0.12       | 1.4E-13  |         |
| rs6599234  | 9     | SCNSA-SCN10A | INTERGENIC     | 3   | 38,690,304  | OTHERSIGNAL       | KNOWN  |             | A/T/0.324          | 71,453  | 0.70  | 0.10       | 2.2E-11  |         |
| rs6801957  | 9     | SCNSA-SCN10A | INTRONIC       | 3   | 38,742,319  | OTHERSIGNAL       | KNOWN  |             | T/C/0.403          | 74,534  | -0.63 | 0.10       | 1.1E-10  |         |
| rs17784882 | 10    | C3ORF75      | INTRONIC       | 3   | 47,519,007  | INDEX             | NOVEL  |             | A/C/0.396          | 76,184  | -0.54 | 0.10       | 3.3E-08  |         |
| rs2363719  | 11    | SLC4A4       | INTRONIC       | 4   | 72,357,080  | INDEX             | NOVEL  |             | A/G/0.108          | 70,821  | 0.97  | 0.16       | 7.8E-10  |         |
| rs3857067  | 12    | SMARCD1      | INTERGENIC     | 4   | 95,245,457  | INDEX             | NOVEL  | REPLIC      | A/T/0.457          | 101,382 | -0.51 | 0.08       | 1.2E-09  |         |
| rs10040989 | 13    | GFRA3        | INTERGENIC     | 5   | 137,601,624 | INDEX             | NOVEL  | REPLIC      | A/G/0.133          | 87,942  | -0.85 | 0.13       | 5.4E-11  |         |
| rs7765828  | 14    | GMPR         | INTRONIC       | 6   | 16,402,701  | INDEX             | NOVEL  | REPLIC      | G/C/0.402          | 93,262  | 0.55  | 0.09       | 3.2E-10  |         |
| rs457162   | 15    | SLC35F1-PLN  | INTRONIC       | 6   | 118,642,676 | OTHERSIGNAL       | KNOWN  |             | T/A/0.059          | 70,449  | -1.85 | 0.21       | 2.5E-18  |         |
| rs12210733 | 15    | SLC35F1-PLN  | INTERGENIC     | 6   | 118,759,768 | OTHERSIGNAL       | KNOWN  |             | A/G/0.063          | 65,356  | -2.05 | 0.21       | 1.1E-22  |         |
| rs11513730 | 15    | SLC35F1-PLN  | INTERGENIC     | 6   | 118,774,215 | INDEX             | KNOWN  |             | T/C/0.502          | 74,932  | -1.65 | 0.10       | 2.2E-67  |         |
| rs3902035  | 15    | SLC35F1-PLN  | INTRONIC       | 6   | 119,106,925 | OTHERSIGNAL       | KNOWN  |             | C/T/0.316          | 71,216  | -0.85 | 0.11       | 8.0E-16  |         |
| rs9489510  | 15    | SLC35F1-PLN  | INTERGENIC     | 6   | 119,150,591 | OTHERSIGNAL       | KNOWN  |             | G/A/0.31           | 68,745  | 0.61  | 0.11       | 1.4E-08  |         |
| rs9920     | 16    | CAV1         | 3PRIME_UTR     | 7   | 115,987,328 | INDEX             | NOVEL  | REPLIC      | C/T/0.093          | 102,060 | 0.79  | 0.14       | 2.6E-08  |         |
| rs2072413  | 17    | KCNH2        | INTRONIC       | 7   | 150,278,902 | INDEX             | KNOWN  |             | T/C/0.266          | 65,331  | -1.68 | 0.11       | 1.3E-49  |         |
| rs3807375  | 17    | KCNH2        | INTRONIC       | 7   | 150,298,143 | OTHERSIGNAL       | KNOWN  |             | T/C/0.36           | 70,537  | 1.22  | 0.10       | 2.9E-33  |         |
| rs16936870 | 18    | NCOA2        | INTRONIC       | 8   | 71,351,896  | INDEX             | NOVEL  |             | A/T/0.097          | 74,196  | 0.99  | 0.16       | 1.1E-09  |         |
| rs11779860 | 19    | LAPTM4B      | INTRONIC       | 8   | 98,919,506  | INDEX             | NOVEL  |             | C/T/0.47           | 73,404  | -0.61 | 0.10       | 1.7E-10  |         |
| rs1961102  | 20    | AZIN1        | INTERGENIC     | 8   | 104,002,021 | INDEX             | NOVEL  | REPLIC      | T/C/0.331          | 82,677  | 0.57  | 0.10       | 3.4E-09  |         |
| rs2485376  | 21    | GBF1         | INTRONIC       | 10  | 104,039,996 | INDEX             | NOVEL  |             | A/G/0.391          | 70,552  | -0.56 | 0.10       | 2.7E-08  |         |
| rs2301696  | 22    | KCNQ1        | INTRONIC       | 11  | 2,383,560   | OTHERSIGNAL       | KNOWN  |             | G/C/0.404          | 22,791  | -1.14 | 0.18       | 4.3E-10  |         |
| rs2074238  | 22    | KCNQ1        | INTRONIC       | 11  | 2,441,379   | OTHERSIGNAL       | KNOWN  |             | T/C/0.053          | 17,550  | -4.89 | 0.44       | 1.9E-28  |         |
| rs7122937  | 22    | KCNQ1        | INTRONIC       | 11  | 2,443,126   | INDEX             | KNOWN  |             | T/C/0.188          | 72,978  | 1.93  | 0.12       | 1.2E-54  |         |
| rs174583   | 23    | FADS2        | INTRONIC       | 11  | 61,366,326  | INDEX             | NOVEL  | REPLIC      | T/C/0.344          | 100,900 | -0.57 | 0.09       | 8.2E-11  |         |
| rs3026445  | 24    | ATP2A2       | INTRONIC       | 12  | 109,207,586 | INDEX             | NOVEL  | REPLIC      | C/T/0.356          | 95,768  | 0.62  | 0.09       | 2.9E-12  |         |
| rs728926   | 25    | KLF12        | INTRONIC       | 13  | 73,411,123  | INDEX             | NOVEL  |             | T/C/0.362          | 69,219  | 0.57  | 0.10       | 2.1E-08  |         |
| rs2273905  | 26    | ANKRD9       | 5PRIME_UTR     | 14  | 102,044,752 | INDEX             | NOVEL  | REPLIC      | T/C/0.355          | 83,532  | 0.61  | 0.09       | 4.0E-11  |         |
| rs3105593  | 27    | USP50-TRPM7  | INTERGENIC     | 15  | 48,632,310  | INDEX             | NOVEL  |             | T/C/0.446          | 77,240  | 0.66  | 0.10       | 3.1E-12  |         |
| rs1296720  | 28    | CREBBP       | INTRONIC       | 16  | 3,813,643   | INDEX             | NOVEL  |             | C/A/0.197          | 59,812  | 0.83  | 0.13       | 3.6E-10  |         |
| rs12930096 | 29    | LITAF        | INTRONIC       | 16  | 11,578,259  | OTHERSIGNAL       | NOVEL  |             | T/C/0.142          | 48,027  | -1.22 | 0.17       | 2.9E-13  |         |
| rs735951   | 29    | LITAF        | INTERGENIC     | 16  | 11,601,037  | INDEX             | NOVEL  |             | A/G/0.455          | 62,994  | -1.15 | 0.10       | 2.3E-28  |         |
| rs12444261 | 29    | LITAF        | INTERGENIC     | 16  | 11,642,143  | OTHERSIGNAL       | NOVEL  |             | T/G/0.262          | 65,791  | -0.79 | 0.11       | 2.1E-12  |         |
| rs246185   | 30    | MKL2         | INTERGENIC     | 16  | 14,302,933  | INDEX             | NOVEL  | REPLIC      | C/T/0.335          | 77,411  | 0.72  | 0.10       | 2.6E-13  |         |
| rs4784934  | 31    | CNOT1        | INTERGENIC     | 16  | 57,017,427  | OTHERSIGNAL       | KNOWN  |             | A/G/0.254          | 67,425  | 0.67  | 0.12       | 5.5E-09  |         |
| rs246196   | 31    | CNOT1        | INTRONIC       | 16  | 57,131,754  | INDEX             | KNOWN  |             | C/T/0.259          | 76,513  | -1.73 | 0.11       | 2.0E-57  |         |
| rs1052536  | 32    | LIG3         | 3PRIME_UTR     | 17  | 30,355,688  | INDEX             | KNOWN  |             | C/T/0.53           | 75,961  | 0.98  | 0.10       | 6.2E-25  |         |
| rs9892651  | 33    | PRKCA        | INTRONIC       | 17  | 61,734,255  | INDEX             | KNOWN  |             | C/T/0.429          | 74,683  | -0.74 | 0.10       | 2.7E-14  |         |
| rs236586   | 34    | KCNJ2        | INTERGENIC     | 17  | 65,715,141  | OTHERSIGNAL       | KNOWN  |             | G/A/0.466          | 70,855  | 0.64  | 0.10       | 6.0E-11  |         |
| rs10775360 | 34    | KCNJ2        | INTERGENIC     | 17  | 65,837,463  | OTHERSIGNAL       | KNOWN  |             | T/C/0.292          | 73,723  | -0.76 | 0.11       | 1.1E-12  |         |
| rs1396515  | 34    | KCNJ2        | INTERGENIC     | 17  | 65,942,588  | INDEX             | KNOWN  |             | C/G/0.521          | 77,058  | -0.98 | 0.09       | 2.0E-25  |         |
| rs17763769 | 34    | KCNJ2        | INTERGENIC     | 17  | 66,072,384  | OTHERSIGNAL       | KNOWN  |             | A/G/0.146          | 74,831  | 0.89  | 0.14       | 4.8E-11  |         |
| rs1805128  | 35    | KCNE1        | NON_SYNONYMOUS | 21  | 34,743,550  | INDEX             | KNOWN  |             | T/C/0.01           | 20,061  | 7.42  | 0.85       | 2.0E-18  |         |

Supplementary Table 8a: 68 independent QT SNPs at 35 QT loci. Shown are the association results for all 68 independent SNPs at 35 loci on the basis of having an  $r^2 < 0.05$  in HapMap CEU to any other SNP on the list. See the legend for Supplementary Table 6 for description of fields.



| INDEX SNP  | LOCUS | NEAREST GENE | MISSENSE SNP | R2    | gene   | AA change | P vs sentinel |
|------------|-------|--------------|--------------|-------|--------|-----------|---------------|
| rs846111   | 1     | RNF207       | rs846111     | same  | RNF207 | G603A     | same          |
| rs6801957  | 9     | SCN5A-SCN10A | rs6795970    | 0.979 | SCN10A | V1073A    | 6E-10 v 3E-10 |
| rs17784882 | 10    | C3ORF75      | rs12487736   | 0.873 | SCAP   | V798I     | NA            |
| rs17784882 | 10    | C3ORF75      | rs2276853    | 0.873 | KIF9   | R638W     | 7E-7 v 5E-8   |
| rs17784882 | 10    | C3ORF75      | rs6780013    | 0.866 | PTPN23 | A944T     | 3E-6 v 5E-8   |
| rs17784882 | 10    | C3ORF75      | rs4082155    | 0.844 | SETD2  | P1962L    | 7E-6 v 5E-8   |
| rs7765828  | 14    | GMPR         | rs1042391    | 1     | GMPR   | F256I     | 1             |
| rs1805128  | 35    | KCNE1        | rs1805128    | same  | KCNE1  | D85N      | same          |

Supplementary Table 8b: SNPs correlated with missense SNPs. Missense SNPs are shown for all index and nonindex signals for SNPs with  $r^2 > 0.8$  in HapMap CEU to a given QT-associated SNPs. When a proxy but not the lead SNP was missense, the  $r^2$  of proxy to the lead SNP is shown as well as its P-value for association with QT interval in comparison to the P-value for the lead SNP in the GWAS meta-analysis (to allow meaningful comparison of P-values).

| QT-IGC     | QT-IGC | QT-IGC       | QT-IGC | QT-IGC       | QT-IGC | QT-IGC | CARE-COGEN | CA-CO | CA-CO        | CA-CO | CA-CO | CA-CO   | CA-CO | CA-CO  | CA-CO      | CA-CO  | CA-CO     | CA-CO |
|------------|--------|--------------|--------|--------------|--------|--------|------------|-------|--------------|-------|-------|---------|-------|--------|------------|--------|-----------|-------|
| SNP        | LOCUS  | NEAREST GENE | CHR    | CODED ALLELE |        |        | BETA       | SNP   | CODED ALLELE |       |       | beta    |       |        | p < 0.0007 |        | direction |       |
|            |        |              |        | ALLELE       | FREQ   | ALLELE |            |       | FREQ         | BETA  | ?flip | flipped | SE    | N_EFF  | P_GC       |        |           |       |
| rs2273042  | 1      | RNF207       | 1      | A            | 0.110  | 0.94   | rs2273042  | A     | 0.130        | -0.65 | 1     | -0.65   | 0.80  | 9,542  | 0.43       |        |           | diff  |
| rs846111   | 1      | RNF207       | 1      | C            | 0.283  | 1.73   | rs846111   | C     | 0.169        | 0.65  | 1     | 0.65    | 0.55  | 8,243  | 0.25       |        |           | same  |
| rs2298632  | 2      | TCEA3        | 1      | T            | 0.496  | 0.70   | rs2298632  | C     | 0.794        | -0.68 | -1    | 0.68    | 0.36  | 13,102 | 0.06       |        |           | same  |
| rs6669543  | 3      | NOS1AP       | 1      | T            | 0.258  | 1.46   | rs6669543  | C     | 0.379        | -0.57 | -1    | 0.57    | 0.31  | 10,445 | 0.07       |        |           | same  |
| rs4565345  | 3      | NOS1AP       | 1      | A            | 0.085  | -4.73  | rs4565345  | A     | 0.395        | -4.71 | 1     | -4.71   | 4.72  | 497    | 0.33       |        |           | same  |
| rs12143842 | 3      | NOS1AP       | 1      | T            | 0.240  | 3.50   | rs12143842 | C     | 0.802        | -3.14 | -1    | 3.14    | 0.39  | 12,812 | 1.8E-15    | signif |           | same  |
| rs16857031 | 3      | NOS1AP       | 1      | G            | 0.132  | 2.37   | rs16857031 | C     | 0.676        | -0.80 | -1    | 0.80    | 0.29  | 12,207 | 0.008      |        |           | same  |
| rs17457880 | 3      | NOS1AP       | 1      | A            | 0.055  | -1.90  | rs17457880 | A     | 0.101        | -3.34 | 1     | -3.34   | 2.15  | 3,821  | 0.13       |        |           | same  |
| rs4657172  | 3      | NOS1AP       | 1      | C            | 0.125  | -0.81  | rs4657172  | C     | 0.304        | -0.60 | 1     | -0.60   | 0.29  | 13,121 | 0.04       |        |           | same  |
| rs3934467  | 3      | NOS1AP       | 1      | T            | 0.222  | 2.74   | rs3934467  | C     | 0.664        | -1.69 | -1    | 1.69    | 0.28  | 13,170 | 2.6E-09    | signif |           | same  |
| rs7545047  | 3      | NOS1AP       | 1      | A            | 0.049  | -1.78  | rs7545047  | A     | 0.407        | -9.14 | 1     | -9.14   | 3.50  | 1,584  | 0.01       |        |           | same  |
| rs17460657 | 3      | NOS1AP       | 1      | C            | 0.045  | -4.60  | rs17460657 | A     | 0.893        | -0.35 | -1    | 0.35    | 2.55  | 2,912  | 0.89       |        |           | diff  |
| rs347272   | 3      | NOS1AP       | 1      | A            | 0.132  | 1.80   | rs347272   | A     | 0.307        | -0.35 | 1     | -0.35   | 0.29  | 12,721 | 0.24       |        |           | diff  |
| rs164133   | 3      | NOS1AP       | 1      | C            | 0.264  | 0.72   | rs164133   | C     | 0.340        | -0.30 | 1     | -0.30   | 0.29  | 12,134 | 0.31       |        |           | diff  |
| rs545833   | 4      | ATP1B1       | 1      | T            | 0.266  | 0.90   | rs545833   | C     | 0.672        | -0.42 | -1    | 0.42    | 0.29  | 12,650 | 0.15       |        |           | same  |
| rs12061601 | 4      | ATP1B1       | 1      | C            | 0.117  | -1.41  | rs12061601 | C     | 0.295        | -1.89 | 1     | -1.89   | 0.30  | 12,608 | 5.9E-10    | signif |           | same  |
| rs10919070 | 4      | ATP1B1       | 1      | C            | 0.126  | -1.68  | rs10919070 | A     | 0.837        | 2.06  | -1    | -2.06   | 1.07  | 6,825  | 0.06       |        |           | same  |
| rs12079745 | 4      | ATP1B1       | 1      | A            | 0.059  | -1.34  | rs12079745 | A     | 0.164        | -1.28 | 1     | -1.28   | 0.43  | 12,524 | 0.003      |        |           | same  |
| rs1983546  | 4      | ATP1B1       | 1      | G            | 0.348  | -0.81  | rs1983546  | A     | 0.418        | 0.69  | -1    | -0.69   | 0.26  | 13,103 | 0.010      |        |           | same  |
| rs6544311  | 5      | SLC8A1       | 2      | A            | 0.376  | 0.65   | rs6544311  | C     | 0.505        | 0.92  | -1    | -0.92   | 0.94  | 1,226  | 0.33       |        |           | diff  |
| rs12997023 | 5      | SLC8A1       | 2      | C            | 0.049  | -1.69  | rs12997023 | C     | 0.150        | -1.68 | 1     | -1.68   | 0.45  | 12,873 | 2.6E-04    | signif |           | same  |
| rs938291   | 6      | SP3          | 2      | G            | 0.390  | 0.53   | rs938291   | C     | 0.531        | -0.36 | -1    | 0.36    | 0.25  | 13,039 | 0.17       |        |           | same  |
| rs7561149  | 7      | CCDC141      | 2      | C            | 0.420  | -0.52  | rs7561149  | C     | 0.249        | -0.33 | 1     | -0.33   | 0.32  | 12,987 | 0.31       |        |           | same  |
| rs295140   | 8      | SPATS2L      | 2      | T            | 0.423  | 0.61   | rs295140   | C     | 0.638        | -0.36 | -1    | 0.36    | 0.28  | 13,063 | 0.20       |        |           | same  |
| rs6793245  | 9      | SCN5A-SCN    | 3      | A            | 0.317  | -1.12  | rs6793245  | A     | 0.570        | -0.51 | 1     | -0.51   | 0.26  | 13,043 | 0.05       |        |           | same  |
| rs11708996 | 9      | SCN5A-SCN    | 3      | C            | 0.148  | -0.92  | rs11708996 | C     | 0.443        | -2.92 | 1     | -2.92   | 1.80  | 2,020  | 0.11       |        |           | same  |
| rs11710077 | 9      | SCN5A-SCN    | 3      | T            | 0.209  | 0.92   | rs11710077 | A     | 0.770        | -0.81 | -1    | 0.81    | 0.42  | 13,045 | 0.06       |        |           | same  |
| rs6599234  | 9      | SCN5A-SCN    | 3      | A            | 0.324  | 0.70   | rs6599234  | A     | 0.208        | 0.08  | 1     | 0.08    | 0.36  | 12,617 | 0.82       |        |           | same  |
| rs6801957  | 9      | SCN5A-SCN    | 3      | T            | 0.403  | -0.63  | rs6801957  | C     | 0.765        | 0.95  | -1    | -0.95   | 0.35  | 12,421 | 0.008      |        |           | same  |
| rs17784882 | 10     | C3ORF75      | 3      | A            | 0.396  | -0.54  | rs17784882 | A     | 0.310        | 0.17  | 1     | 0.17    | 0.29  | 12,779 | 0.58       |        |           | diff  |
| rs2363719  | 11     | SLC4A4       | 4      | A            | 0.108  | 0.97   | rs2363719  | A     | 0.150        | -0.50 | 1     | -0.50   | 0.45  | 13,080 | 0.27       |        |           | diff  |
| rs3857067  | 12     | SMARCAD1     | 4      | A            | 0.457  | -0.51  | rs3857067  | A     | 0.553        | -0.13 | 1     | -0.13   | 0.30  | 13,066 | 0.66       |        |           | same  |
| rs10040989 | 13     | GFRA3        | 5      | A            | 0.133  | -0.85  | rs10040989 | A     | 0.153        | 0.01  | 1     | 0.01    | 0.44  | 13,081 | 0.99       |        |           | diff  |
| rs7765828  | 14     | GMMPR        | 6      | G            | 0.402  | 0.55   | rs7765828  | C     | 0.233        | 0.09  | -1    | -0.09   | 0.34  | 12,911 | 0.79       |        |           | diff  |
| rs457162   | 15     | SLC35F1-PL   | 6      | T            | 0.059  | -1.85  | rs457162   | A     | 0.835        | -0.33 | -1    | 0.33    | 0.46  | 12,981 | 0.48       |        |           | diff  |
| rs12210733 | 15     | SLC35F1-PL   | 6      | A            | 0.063  | -2.05  | rs12210733 | A     | 0.125        | 0.64  | 1     | 0.64    | 1.58  | 6,732  | 0.69       |        |           | diff  |
| rs11153730 | 15     | SLC35F1-PL   | 6      | T            | 0.502  | -1.65  | rs11153730 | C     | 0.318        | 0.57  | -1    | -0.57   | 0.29  | 12,799 | 0.05       |        |           | same  |
| rs3902035  | 15     | SLC35F1-PL   | 6      | C            | 0.316  | -0.85  | rs3902035  | C     | 0.173        | -0.45 | 1     | -0.45   | 0.70  | 7,810  | 0.53       |        |           | same  |
| rs9489510  | 15     | SLC35F1-PL   | 6      | G            | 0.310  | 0.61   | rs9489510  | A     | 0.502        | -0.03 | -1    | 0.03    | 0.27  | 11,722 | 0.92       |        |           | same  |
| rs9920     | 16     | CAV1         | 7      | C            | 0.093  | 0.79   | rs9920     | C     | 0.092        | -0.16 | 1     | -0.16   | 0.90  | 12,753 | 0.86       |        |           | diff  |
| rs2072413  | 17     | KCNH2        | 7      | T            | 0.266  | -1.68  | rs2072413  | C     | 0.632        | 1.34  | -1    | -1.34   | 0.38  | 6,746  | 5.9E-04    | signif |           | same  |
| rs3807375  | 17     | KCNH2        | 7      | T            | 0.360  | 1.22   | rs3807375  | C     | 0.368        | -0.71 | -1    | 0.71    | 0.28  | 13,090 | 0.01       |        |           | same  |
| rs16936870 | 18     | NCOA2        | 8      | A            | 0.097  | 0.99   | rs16936870 | A     | 0.120        | 0.64  | 1     | 0.64    | 0.61  | 12,376 | 0.30       |        |           | same  |
| rs11779860 | 19     | LAPTM4B      | 8      | C            | 0.470  | -0.61  | rs11779860 | C     | 0.408        | 0.04  | 1     | 0.04    | 0.27  | 12,098 | 0.87       |        |           | diff  |
| rs1961102  | 20     | AZIN1        | 8      | T            | 0.331  | 0.57   | rs1961102  | C     | 0.815        | -0.31 | -1    | 0.31    | 0.44  | 11,982 | 0.49       |        |           | same  |
| rs2485376  | 21     | GBF1         | 10     | A            | 0.391  | -0.56  | rs2485376  | A     | 0.190        | -0.04 | 1     | -0.04   | 0.35  | 11,695 | 0.90       |        |           | same  |
| rs2301696  | 22     | KCNQ1        | 11     | G            | 0.404  | -1.14  | rs2301696  | C     | 0.433        | -0.94 | -1    | 0.94    | 0.67  | 2,188  | 0.17       |        |           | diff  |
| rs2074238  | 22     | KCNQ1        | 11     | T            | 0.053  | -4.89  | rs2074238  | C     | 0.512        | 3.11  | -1    | -3.11   | 3.48  | 1,504  | 0.38       |        |           | same  |
| rs7122937  | 22     | KCNQ1        | 11     | T            | 0.188  | 1.93   | rs7122937  | C     | 0.515        | -1.35 | -1    | 1.35    | 0.29  | 9,959  | 6.7E-06    | signif |           | same  |
| rs174583   | 23     | FADS2        | 11     | T            | 0.344  | -0.57  | rs174583   | C     | 0.718        | 0.62  | -1    | -0.62   | 0.31  | 10,938 | 0.05       |        |           | same  |
| rs3026445  | 24     | ATP2A2       | 12     | C            | 0.356  | 0.62   | rs3026445  | C     | 0.579        | 0.47  | 1     | 0.47    | 0.26  | 13,073 | 0.08       |        |           | same  |
| rs728926   | 25     | KLF12        | 13     | T            | 0.362  | 0.57   | rs728926   | C     | 0.632        | -0.35 | -1    | 0.35    | 0.29  | 12,013 | 0.23       |        |           | same  |
| rs2273905  | 26     | ANKRD9       | 14     | T            | 0.355  | 0.61   | rs2273905  | C     | 0.781        | -1.10 | -1    | 1.10    | 0.39  | 12,021 | 0.005      |        |           | same  |
| rs3105593  | 27     | TRPM7        | 15     | T            | 0.446  | 0.66   | rs3105593  | C     | 0.579        | -0.98 | -1    | 0.98    | 0.26  | 13,088 | 2.1E-04    | signif |           | same  |
| rs1296720  | 28     | CREBBP       | 16     | C            | 0.197  | 0.83   | rs1296720  | A     | 0.790        | -0.57 | -1    | 0.57    | 0.85  | 6,674  | 0.51       |        |           | same  |
| rs12930096 | 29     | LITAF        | 16     | T            | 0.142  | -1.22  | rs8050461* | A     | 0.218        | 0.22  | 1     | 0.22    | 0.41  | 10,094 | 0.59       |        |           | diff  |
| rs735951   | 29     | LITAF        | 16     | A            | 0.455  | -1.15  | rs735951   | A     | 0.440        | -1.44 | 1     | -1.44   | 0.31  | 9,146  | 5.6E-06    | signif |           | same  |
| rs12444261 | 29     | LITAF        | 16     | T            | 0.262  | -0.79  | rs12444261 | G     | 0.790        | 0.89  | -1    | -0.89   | 0.35  | 12,776 | 0.01       |        |           | same  |
| rs246185   | 30     | MKL2         | 16     | C            | 0.335  | 0.72   | rs246185   | C     | 0.358        | 0.37  | 1     | 0.37    | 0.31  | 10,528 | 0.23       |        |           | same  |
| rs4784934  | 31     | CNOT1        | 16     | A            | 0.254  | 0.67   | rs4784934  | A     | 0.316        | 0.37  | 1     | 0.37    | 0.30  | 12,117 | 0.23       |        |           | same  |
| rs246196   | 31     | CNOT1        | 16     | C            | 0.259  | -1.73  | rs246196   | C     | 0.208        | -1.40 | 1     | -1.40   | 0.35  | 13,143 | 7.7E-05    | signif |           | same  |
| rs1052536  | 32     | LIG3         | 17     | C            | 0.530  | 0.98   | rs1052536  | C     | 0.787        | 0.81  | 1     | 0.81    | 0.36  | 13,077 | 0.03       |        |           | same  |
| rs9892651  | 33     | PRKCA        | 17     | C            | 0.429  | -0.74  | rs9892651  | C     | 0.378        | -0.72 | 1     | -0.72   | 0.27  | 13,023 | 0.009      |        |           | same  |
| rs236586   | 34     | KCNJ2        | 17     | G            | 0.466  | 0.64   | rs236586   | A     | 0.490        | -1.00 | -1    | 1.00    | 0.27  | 12,161 | 2.2E-04    | signif |           | same  |
| rs10775360 | 34     | KCNJ2        | 17     | T            | 0.292  | -0.76  | rs10775360 | C     | 0.743        | 0.25  | -1    | -0.25   | 0.34  | 12,265 | 0.47       |        |           | same  |
| rs1396515  | 34     | KCNJ2        | 17     | C            | 0.521  | -0.98  | rs1396515  | C     | 0.608        | -0.45 | 1     | -0.45   | 0.26  | 13,078 | 0.09       |        |           | same  |
| rs17763769 | 34     | KCNJ2        | 17     | A            | 0.146  | 0.89   | rs17763769 | A     | 0.151        | -0.54 | 1     | -0.54   | 1.00  | 7,509  | 0.60       |        |           | diff  |
| rs1805128  | 35     | KCNE1        | 21     | T            | 0.010  | 7.42   | rs1805128  | NA    | NA           | NA    | NA    | NA      | NA    | NA     | NA         | NA     | NA        | NA    |

\*SNP rs8050461 is a proxy (r2=1 in 1KG CEU, 0.48 in 1KG YRI) for rs12930096

0.60 correlation EA-AA  
0.37 r2  
9.E-10 P  
same diff  
P 1.1E-05

Supplementary Table 9: Association of QT SNPs in African Americans. Shown are the QT association results in African Americans from the CARE-COGEN GWAS for all 68 independent SNPs (r2<0.05) that achieved genome-wide significance in the QT-IGC samples of European ancestry. One SNP was not found in the CARE-COGEN GWAS results because it was not included in HapMap YRI haplotypes; results for a proxy are shown but the proxy is only modestly correlated (r2=0.48 in 1000Genomes YRI) to the QT-IGC SNP. Statistically significant association in African Americans is claimed for SNPs with 2-sided P<0.0007 (=0.05/68) in the same direction as in QT-IGC. The sign of effect estimates is reversed (beta flip) if the coded allele in CARE-COGEN was the non-coded allele in QT-IGC. Directional consistency is also reported.



| NHGRI<br>Strongest SNP-<br>Risk Allele | NHGRI<br>Trait         | NHGRI<br>First Author | NHGRI<br>PUBMED ID | NHGRI<br>Chr_id | NHGRI<br>Chr_pos | NHGRI<br>p-Value | QT-IGC<br>proxy | QT-IGC<br>SNP | QT-IGC<br>gene | QT-IGC<br>r2_proxy_sentinel | QT-IGC<br>r2_source |
|----------------------------------------|------------------------|-----------------------|--------------------|-----------------|------------------|------------------|-----------------|---------------|----------------|-----------------------------|---------------------|
| rs11708996-C                           | PR interval            | Pfeufer A             | 20062060           | 3               | 38633923         | 6.00E-26         | rs11708996      | rs11708996    | SCN5A-SCN10A   | 1                           | 1KG                 |
| rs6795970-A                            | PR interval            | Chambers JC           | 20062061           | 3               | 38766675         | 3.00E-15         | rs6795970       | rs6801957     | SCN5A-SCN10A   | 0.933                       | 1KG                 |
| rs6795970-A                            | PR interval            | Holm H                | 20062063           | 3               | 38766675         | 1.00E-58         | rs6795970       | rs6801957     | SCN5A-SCN10A   | 0.933                       | 1KG                 |
| rs6800541-C                            | PR interval            | Pfeufer A             | 20062060           | 3               | 38774832         | 2.00E-74         | rs6800541       | rs6801957     | SCN5A-SCN10A   | 0.966                       | 1KG                 |
| rs174535-T                             | n-3 fatty acid         | Lemaitre RN           | 21829377           | 11              | 61551356         | 1.00E-151        | rs174535        | rs174583      | FADS2          | 1                           | HM22                |
| rs174535-T                             | n-3 fatty acid         | Lemaitre RN           | 21829377           | 11              | 61551356         | 6.00E-58         | rs174535        | rs174583      | FADS2          | 1                           | HM22                |
| rs174536-A                             | n-3 fatty acid         | Lemaitre RN           | 21829377           | 11              | 61551927         | 1.00E-63         | rs174536        | rs174583      | FADS2          | 1                           | HM22                |
| rs102275-T                             | n-3 fatty acid         | Lemaitre RN           | 21829377           | 11              | 61557803         | 7.00E-64         | rs102275        | rs174583      | FADS2          | 1                           | HM22                |
| rs102275-T                             | n-3 fatty acid         | Lemaitre RN           | 21829377           | 11              | 61557803         | 8.00E-153        | rs102275        | rs174583      | FADS2          | 1                           | HM22                |
| rs102275-C                             | Crohn's disease        | Franke A              | 21102463           | 11              | 61557803         | 2.00E-11         | rs102275        | rs174583      | FADS2          | 1                           | HM22                |
| rs174538-A                             | n-3 fatty acid         | Lemaitre RN           | 21829377           | 11              | 61560081         | 5.00E-58         | rs174538        | rs174583      | FADS2          | 0.896                       | HM22                |
| rs4246215-T                            | n-3 fatty acid         | Lemaitre RN           | 21829377           | 11              | 61564299         | 6.00E-55         | rs4246215       | rs174583      | FADS2          | 0.899                       | HM22                |
| rs4246215-T                            | n-3 fatty acid         | Lemaitre RN           | 21829377           | 11              | 61564299         | 1.00E-139        | rs4246215       | rs174583      | FADS2          | 0.899                       | HM22                |
| rs4246215-T                            | n-3 fatty acid         | Lemaitre RN           | 21829377           | 11              | 61564299         | 9.00E-60         | rs4246215       | rs174583      | FADS2          | 0.899                       | HM22                |
| rs174547-T                             | n-3 fatty acid         | Lemaitre RN           | 21829377           | 11              | 61570783         | 4.00E-154        | rs174547        | rs174583      | FADS2          | 1                           | HM22                |
| rs174547-T                             | n-3 fatty acid         | Lemaitre RN           | 21829377           | 11              | 61570783         | 3.00E-64         | rs174547        | rs174583      | FADS2          | 1                           | HM22                |
| rs174547-C                             | phosphatidylcholine    | Illig T               | 20037589           | 11              | 61570783         | 7.00E-179        | rs174547        | rs174583      | FADS2          | 1                           | HM22                |
| rs174547-C                             | HDL                    | Kathiresan S          | 19060906           | 11              | 61570783         | 2.00E-12         | rs174547        | rs174583      | FADS2          | 1                           | HM22                |
| rs174547-C                             | TG                     | Kathiresan S          | 19060906           | 11              | 61570783         | 2.00E-14         | rs174547        | rs174583      | FADS2          | 1                           | HM22                |
| rs174548-G                             | HDL                    | Waterworth DM         | 20864672           | 11              | 61571348         | 1.00E-12         | rs174548        | rs174583      | FADS2          | 0.835                       | 1KG                 |
| rs174548-G                             | TG                     | Waterworth DM         | 20864672           | 11              | 61571348         | 5.00E-14         | rs174548        | rs174583      | FADS2          | 0.835                       | 1KG                 |
| rs174550-T                             | n-3 fatty acid         | Lemaitre RN           | 21829377           | 11              | 61571478         | 1.00E-57         | rs174550        | rs174583      | FADS2          | 1                           | HM22                |
| rs174550-T                             | fasting plasma glucose | Dupuis J              | 20081858           | 11              | 61571478         | 2.00E-15         | rs174550        | rs174583      | FADS2          | 1                           | HM22                |
| rs174550-T                             | HOMA-B                 | Dupuis J              | 20081858           | 11              | 61571478         | 5.00E-13         | rs174550        | rs174583      | FADS2          | 1                           | HM22                |
| rs1535-A                               | n-3 fatty acid         | Lemaitre RN           | 21829377           | 11              | 61597972         | 3.00E-63         | rs1535          | rs174583      | FADS2          | 1                           | 1KG                 |
| rs1535-A                               | n-3 fatty acid         | Lemaitre RN           | 21829377           | 11              | 61597972         | 3.00E-152        | rs1535          | rs174583      | FADS2          | 1                           | 1KG                 |
| rs174574-A                             | n-3 fatty acid         | Lemaitre RN           | 21829377           | 11              | 61600342         | 4.00E-55         | rs174574        | rs174583      | FADS2          | 1                           | 1KG                 |
| rs174601-T                             | alkaline phosphatase   | Chambers JC           | 22001757           | 11              | 61623140         | 3.00E-09         | rs174601        | rs174583      | FADS2          | 0.896                       | 1KG                 |
| rs1659127-A                            | age at menarche        | Elks CE               | 21102462           | 16              | 14388305         | 4.00E-09         | rs1659127       | rs246185      | MKL2           | 0.837                       | 1KG                 |

Supplementary Table 11: Association of QT SNPs in the NHGRI GWAS Catalog. Shown are the association results for all SNPs with  $r^2 > 0.80$  in HapMap CEU or 1000 Genomes CEU to one of the 68 independent QT interval associated SNPs that achieve genome-wide significance ( $P < 5 \times 10^{-8}$ ) for any biomedical trait (excluding heart rate or QRS, see Supplementary Table 10) as reported in the NHGRI GWAS catalog of associations. The first author, journal, Pubmed ID and PubMed link for the publication are included. The  $r^2$  between the QT-IGC SNP and the NHGRI SNP is shown based on HapMap (release 22) or 1000 Genomes (1KG). Locus labels are reported based on the nearest gene in QT-IGC.



|          |            |                   |        |    |             |        |     |                   |           |           |       |           |           |        |         |           |            |           |           |         |
|----------|------------|-------------------|--------|----|-------------|--------|-----|-------------------|-----------|-----------|-------|-----------|-----------|--------|---------|-----------|------------|-----------|-----------|---------|
| C11orf10 | rs1535     | Blood(Fehrmann et | 4.E-11 | 11 | 61,354,548  | no     | no  | 630445            | 5.10E-13  | rs968567  | 0.467 | 1         | rs174583  | 23     | FADS2   | 1.3E-10   | rs1535     | 2.5E-10   | rs968567  | 9.1E-05 |
| C11orf10 | rs102275   | Blood(Fehrmann et | 2.E-10 | 11 | 61,314,379  | no     | no  | 630445            | 5.10E-13  | rs968567  | 0.451 | 1         | rs174583  | 23     | FADS2   | 1.3E-10   | rs102275   | 1.7E-10   | rs968567  | 9.1E-05 |
| FADS1    | rs102275   | Liver(Greenawalt) | 2.E-19 | 11 | 61,314,379  | lowest | yes | 10025909626       | 1.56E-19  | rs102275  | same  | 1         | rs174583  | 23     | FADS2   | 1.3E-10   | rs102275   | 1.7E-10   | rs102275  | 1.7E-10 |
| FADS1    | rs174576   | CR:All            | 4.E-13 | 11 | 61,360,086  | no     | yes | 10025909626       | 4.13E-13  | rs174576  | same  | 1         | rs174583  | 23     | FADS2   | 1.3E-10   | rs174576   | 1.7E-10   | rs174576  | 1.7E-10 |
| FADS1    | rs174549   | Brain             | 4.E-11 | 11 | 61,327,958  | no     | yes | GI_14141179-5     | 3.70E-11  | rs174549  | same  | 0.866     | rs174583  | 23     | FADS2   | 1.3E-10   | rs174549   | 4.2E-08   | rs174549  | 4.2E-08 |
| FADS1    | rs174556   | Blood(Fehrmann et | 5.E-11 | 11 | 61,337,211  | no     | no  | 2360020           | 2.30E-13  | rs968567  | 0.539 | 0.866     | rs174583  | 23     | FADS2   | 1.3E-10   | rs174556   | 3.6E-08   | rs968567  | 9.1E-05 |
| FADS1    | rs174548   | Brain             | 2.E-10 | 11 | 61,327,924  | no     | yes | GI_14141179-5     | 3.70E-11  | rs174549  | 0.964 | 0.835     | rs174583  | 23     | FADS2   | 1.3E-10   | rs174548   | 6.6E-08   | rs174549  | 4.2E-08 |
| FADS1    | rs174556   | PFC:All           | 2.E-10 | 11 | 61,337,211  | no     | yes | 10025909626       | 2.10E-10  | rs174556  | same  | 0.866     | rs174583  | 23     | FADS2   | 1.3E-10   | rs174556   | 3.6E-08   | rs174556  | 3.6E-08 |
| FADS1    | rs174537   | VC:All            | 3.E-10 | 11 | 61,309,256  | no     | yes | 10025909626       | 3.08E-10  | rs174537  | same  | 1         | rs174583  | 23     | FADS2   | 1.3E-10   | rs174537   | 2.3E-10   | rs174537  | 2.3E-10 |
| FADS1    | rs174546   | omental           | 3.E-09 | 11 | 61,326,406  | no     | yes | 10025909626       | 2.62E-09  | rs174546  | same  | 1         | rs174583  | 23     | FADS2   | 1.3E-10   | rs174546   | 1.5E-10   | rs174546  | 1.5E-10 |
| FADS1    | rs174578   | LCL               | 9.E-09 | 11 | 61,362,075  | no     | yes | 208962_s_at       | 8.90E-09  | rs174578  | same  | 1         | rs174583  | 23     | FADS2   | 1.3E-10   | rs174578   | 1.7E-09   | rs174578  | 1.7E-09 |
| FADS1    | rs174547   | Brain             | 9.E-09 | 11 | 61,327,359  | no     | yes | GI_14141179-5     | 3.70E-11  | rs174549  | 0.828 | 1         | rs174583  | 23     | FADS2   | 1.3E-10   | rs174547   | 2.8E-10   | rs174549  | 4.2E-08 |
| FADS1    | rs174537   | Lymph             | 1.E-08 | 11 | 61,309,256  | no     | yes | GI_14141179-5     | 1.33E-08  | rs174537  | same  | 1         | rs174583  | 23     | FADS2   | 1.3E-10   | rs174537   | 2.3E-10   | rs174537  | 2.3E-10 |
| FADS1    | rs174546   | Blood(Fehrmann et | 2.E-08 | 11 | 61,326,406  | no     | no  | 2360020           | 2.30E-13  | rs968567  | 0.467 | 1         | rs174583  | 23     | FADS2   | 1.3E-10   | rs174546   | 1.5E-10   | rs968567  | 9.1E-05 |
| FADS1    | rs102275   | Lymph             | 2.E-08 | 11 | 61,314,379  | no     | yes | GI_14141179-5     | 1.33E-08  | rs174537  | 1     | 1         | rs174583  | 23     | FADS2   | 1.3E-10   | rs102275   | 1.7E-10   | rs174537  | 2.3E-10 |
| FADS1    | rs174537   | Blood(Fehrmann et | 2.E-08 | 11 | 61,309,256  | no     | no  | 2360020           | 2.30E-13  | rs968567  | 0.451 | 1         | rs174583  | 23     | FADS2   | 1.3E-10   | rs174537   | 2.3E-10   | rs968567  | 9.1E-05 |
| FADS1    | rs174574   | LCL               | 3.E-08 | 11 | 61,356,918  | no     | yes | 208962_s_at       | 8.90E-09  | rs174578  | 1     | 1         | rs174583  | 23     | FADS2   | 1.3E-10   | rs174574   | 1.4E-09   | rs174578  | 1.7E-09 |
| FADS1    | rs1535     | Blood(Fehrmann et | 5.E-08 | 11 | 61,354,548  | no     | no  | 2360020           | 2.30E-13  | rs968567  | 0.467 | 1         | rs174583  | 23     | FADS2   | 1.3E-10   | rs1535     | 2.5E-10   | rs968567  | 9.1E-05 |
| FADS2    | rs174556   | Lymph             | 2.E-27 | 11 | 61,337,211  | lowest | no  | GI_14141180-5     | 2.99E-57  | rs968567  | 0.539 | 0.866     | rs174583  | 23     | FADS2   | 1.3E-10   | rs174556   | 3.6E-08   | rs968567  | 9.1E-05 |
| FADS2    | rs174546   | Lymph             | 1.E-25 | 11 | 61,326,406  | no     | no  | GI_14141180-5     | 2.99E-57  | rs968567  | 0.467 | 1         | rs174583  | 23     | FADS2   | 1.3E-10   | rs174546   | 1.5E-10   | rs968567  | 9.1E-05 |
| FADS2    | rs174576   | Lymph             | 7.E-26 | 11 | 61,360,086  | no     | no  | GI_14141180-5     | 2.99E-57  | rs968567  | 0.467 | 1         | rs174583  | 23     | FADS2   | 1.3E-10   | rs174576   | 1.7E-10   | rs968567  | 9.1E-05 |
| FADS2    | rs1535     | Lymph             | 8.E-25 | 11 | 61,354,548  | no     | no  | GI_14141180-5     | 2.99E-57  | rs968567  | 0.467 | 1         | rs174583  | 23     | FADS2   | 1.3E-10   | rs1535     | 2.5E-10   | rs968567  | 9.1E-05 |
| FADS2    | rs174548   | Monocytes         | 2.E-23 | 11 | 61,327,924  | no     | no  | 9.00E-33          | rs174589  | 0.384     | 0.835 | rs174583  | 23        | FADS2  | 1.3E-10 | rs174548  | 6.6E-08    | rs174589  | 7.5E-08   |         |
| FADS2    | rs174549   | Monocytes         | 1.E-22 | 11 | 61,327,958  | no     | no  | 9.00E-33          | rs174589  | 0.368     | 0.866 | rs174583  | 23        | FADS2  | 1.3E-10 | rs174549  | 4.2E-08    | rs174589  | 7.5E-08   |         |
| FADS2    | rs174583   | Monocytes         | 3.E-20 | 11 | 61,366,326  | no     | no  | 9.00E-33          | rs174589  | 0.49      | same  | rs174583  | 23        | FADS2  | 1.3E-10 | rs174583  | 1.3E-10    | rs174589  | 7.5E-08   |         |
| FADS2    | rs174577   | Monocytes         | 5.E-20 | 11 | 61,361,390  | no     | no  | 9.00E-33          | rs174589  | 0.49      | 1     | rs174583  | 23        | FADS2  | 1.3E-10 | rs174577  | 1.2E-10    | rs174589  | 7.5E-08   |         |
| FADS2    | rs174547   | Monocytes         | 2.E-19 | 11 | 61,327,359  | no     | no  | 9.00E-33          | rs174589  | 0.443     | 1     | rs174583  | 23        | FADS2  | 1.3E-10 | rs174547  | 2.8E-10    | rs174589  | 7.5E-08   |         |
| FADS2    | rs174546   | Blood             | 3.E-16 | 11 | 61,326,406  | no     | yes | HSG00271634       | 3.28E-16  | rs174546  | same  | 1         | rs174583  | 23     | FADS2   | 1.3E-10   | rs174546   | 1.5E-10   | rs174546  | 1.5E-10 |
| FADS2    | rs174556   | Blood             | 3.E-16 | 11 | 61,337,211  | no     | yes | HSG00271634       | 3.28E-16  | rs174546  | 0.866 | 0.866     | rs174583  | 23     | FADS2   | 1.3E-10   | rs174556   | 3.6E-08   | rs174546  | 1.5E-10 |
| FADS2    | rs174576   | PBMC              | 3.E-12 | 11 | 61,360,086  | no     | no  | 3333247           | 6.58E-22  | rs968567  | 0.467 | 1         | rs174583  | 23     | FADS2   | 1.3E-10   | rs174576   | 1.7E-10   | rs968567  | 9.1E-05 |
| FADS2    | rs1535     | PBMC              | 5.E-12 | 11 | 61,354,548  | no     | no  | 3333247           | 6.58E-22  | rs968567  | 0.467 | 1         | rs174583  | 23     | FADS2   | 1.3E-10   | rs1535     | 2.5E-10   | rs968567  | 9.1E-05 |
| FADS2    | rs174556   | PBMC              | 6.E-12 | 11 | 61,337,211  | no     | no  | 3333247           | 6.58E-22  | rs968567  | 0.539 | 0.866     | rs174583  | 23     | FADS2   | 1.3E-10   | rs174556   | 3.6E-08   | rs968567  | 9.1E-05 |
| FADS2    | rs174537   | PBMC              | 5.E-11 | 11 | 61,309,256  | no     | no  | 3333247           | 6.58E-22  | rs968567  | 0.451 | 1         | rs174583  | 23     | FADS2   | 1.3E-10   | rs174537   | 2.3E-10   | rs968567  | 9.1E-05 |
| FADS2    | rs174546   | PBMC              | 5.E-11 | 11 | 61,326,406  | no     | no  | 3333247           | 6.58E-22  | rs968567  | 0.467 | 1         | rs174583  | 23     | FADS2   | 1.3E-10   | rs174546   | 1.5E-10   | rs968567  | 9.1E-05 |
| FADS2    | rs102275   | PBMC              | 1.E-10 | 11 | 61,314,379  | no     | no  | 3333247           | 6.58E-22  | rs968567  | 0.451 | 1         | rs174583  | 23     | FADS2   | 1.3E-10   | rs102275   | 1.7E-10   | rs968567  | 9.1E-05 |
| FADS2    | rs174546   | Liver(Greenawalt) | 2.E-08 | 11 | 61,326,406  | no     | yes | 10023819584       | 2.14E-08  | rs174546  | same  | 1         | rs174583  | 23     | FADS2   | 1.3E-10   | rs174546   | 1.5E-10   | rs174546  | 1.5E-10 |
| FADS3    | rs174548   | SchadtLiver       | 2.E-09 | 11 | 61,327,924  | lowest | yes | 1.60E-09          | rs174548  | same      | 0.835 | rs174583  | 23        | FADS2  | 1.3E-10 | rs174548  | 6.6E-08    | rs174548  | 6.6E-08   |         |
| ANAPC7   | rs1502337  | Monocytes         | 2.E-14 | 12 | 109,547,235 | lowest | no  | 5.51E-16          | rs2339511 | 0.249     | 0.851 | rs3026445 | 24        | ATP2A2 | 9.8E-09 | rs1502337 | 1.6E-07    | rs2339511 | 7.1E-01   |         |
| ANAPC7   | rs4766492  | Monocytes         | 3.E-11 | 12 | 109,413,644 | no     | no  | 5.51E-16          | rs2339511 | 0.231     | 0.925 | rs3026445 | 24        | ATP2A2 | 9.8E-09 | rs4766492 | 2.0E-06    | rs2339511 | 7.1E-01   |         |
| ANAPC7   | rs7296679  | Monocytes         | 8.E-11 | 12 | 109,113,875 | no     | no  | 5.51E-16          | rs2339511 | 0.231     | 1     | rs3026445 | 24        | ATP2A2 | 9.8E-09 | rs7296679 | 4.8E-08    | rs2339511 | 7.1E-01   |         |
| ARPC3    | rs4766500  | Blood(Fehrmann et | 3.E-13 | 12 | 109,478,174 | lowest | yes | 7380193           | 3.10E-13  | rs4766500 | same  | 0.851     | rs3026445 | 24     | ATP2A2  | 9.8E-09   | rs4766500  | 3.8E-07   | rs4766500 | 3.8E-07 |
| ARPC3    | rs10774599 | Blood(Fehrmann et | 4.E-12 | 12 | 109,181,831 | no     | yes | 7380193           | 3.10E-13  | rs4766500 | 0.886 | 0.962     | rs3026445 | 24     | ATP2A2  | 9.8E-09   | rs10774599 | 2.9E-08   | rs4766500 | 3.8E-07 |
| C12orf24 | rs4766500  | Blood(Fehrmann et | 4.E-10 | 12 | 109,478,174 | lowest | yes | 780240            | 4.40E-10  | rs4766500 | same  | 0.851     | rs3026445 | 24     | ATP2A2  | 9.8E-09   | rs4766500  | 3.8E-07   | rs4766500 | 3.8E-07 |
| C12orf24 | rs4766500  | Blood(Fehrmann et | 5.E-10 | 12 | 109,478,174 | no     | yes | Human_RefSeq-8_v2 | 4.40E-10  | rs4766500 | same  | 0.862     | rs3026445 | 24     | ATP2A2  | 9.8E-09   | rs4766500  | 3.8E-07   | rs4766500 | 3.8E-07 |
| C12orf24 | rs10774599 | Blood(Fehrmann et | 4.E-09 | 12 | 109,181,831 | no     | yes | Human_RefSeq-8_v2 | 4.40E-10  | rs4766500 | 0.886 | 0.962     | rs3026445 | 24     | ATP2A2  | 9.8E-09   | rs10774599 | 2.9E-08   | rs4766500 | 3.8E-07 |
| GPN3     | rs4766500  | Lymph             | 4.E-15 | 12 | 109,478,174 | lowest | yes | GI_21361522-5     | 3.68E-15  | rs4766500 | same  | 0.851     | rs3026445 | 24     | ATP2A2  | 9.8E-09   | rs4766500  | 3.8E-07   | rs4766500 | 3.8E-07 |
| VPS29    | rs4766497  | omental           | 3.E-89 | 12 | 109,434,759 | lowest | yes | 10025904743       | 2.82E-89  | rs4766497 | same  | 0.887     | rs3026445 | 24     | ATP2A2  | 9.8E-09   | rs4766497  | 1.9E-06   | rs4766497 | 1.9E-06 |
| VPS29    | rs4766497  | SubCutAdipose(Gre | 4.E-76 | 12 | 109,434,759 | no     | yes | 10025904743       | 3.66E-76  | rs4766497 | same  | 0.887     | rs3026445 | 24     | ATP2A2  | 9.8E-09   | rs4766497  | 1.9E-06   | rs4766497 | 1.9E-06 |
| VPS29    | rs4766497  | PFC:All           | 3.E-62 | 12 | 109,434,759 | no     | yes | 10025904743       | 2.82E-62  | rs4766497 | same  | 0.887     | rs3026445 | 24     | ATP2A2  | 9.8E-09   | rs4766497  | 1.9E-06   | rs4766497 | 1.9E-06 |
| VPS29    | rs4766497  | Liver(Greenawalt) | 1.E-59 | 12 | 109,434,759 | no     | yes | 10025904743       | 1.13E-59  | rs4766497 | same  | 0.887     | rs3026445 | 24     | ATP2A2  | 9.8E-09   | rs4766497  | 1.9E-06   | rs4766497 | 1.9E-06 |
| VPS29    | rs4766497  | CR:All            | 1.E-53 | 12 | 109,434,759 | no     | yes | 10025904743       | 1.19E-53  | rs4766497 | same  | 0.887     | rs3026445 | 24     | ATP2A2  | 9.8E-09   | rs4766497  | 1.9E-06   | rs4766497 | 1.9E-06 |
| VPS29    | rs4766497  | VC:All            | 7.E-43 | 12 | 109,434,759 | no     | yes | 10025904743       | 6.57E-43  | rs4766497 | same  | 0.887     | rs3026445 | 24     | ATP2A2  | 9.8E-09   | rs4766497  | 1.9E-06   | rs4766497 | 1.9E-06 |
| VPS29    | rs4766492  | SchadtLiver       | 3.E-39 | 12 | 109,413,644 | no     | yes | 2.73E-39          | rs4766492 | same      | 0.925 | rs3026445 | 24        | ATP2A2 | 9.8E-09 | rs4766492 | 2.0E-06    | rs4766492 | 2.0E-06   |         |
| VPS29    | rs4766497  | PFC:Alzh          | 3.E-30 | 12 | 109,434,759 | no     | yes | 10025904743       | 2.63E-30  | rs4766497 | same  | 0.887     | rs3026445 | 24     | ATP2A2  | 9.8E-09   | rs4766497  | 1.9E-06   | rs4766497 | 1.9E-06 |
| VPS29    | rs4766497  | CR:Alzh           | 5.E-26 | 12 | 109,434,759 | no     | yes | 10025904743       | 4.78E-26  | rs4766497 | same  | 0.887     | rs3026445 | 24     | ATP2A2  | 9.8E-09   | rs4766497  | 1.9E-06   | rs4766497 | 1.9E-06 |
| VPS29    | rs6606686  | PFC:All           | 1.E-25 | 12 | 109,387,763 | no     | yes | 10025904743       | 2.82E-62  | rs4766497 | 0.813 | 0.855     | rs3026445 | 24     | ATP2A2  | 9.8E-09   | rs6606686  | 1.8E-07   | rs4766497 | 1.9E-06 |
| VPS29    | rs6606686  | CR:All            | 7.E-24 | 12 | 109,387,763 | no     | yes | 10025904743       | 1.19E-53  | rs476649  |       |           |           |        |         |           |            |           |           |         |

|            |            |                   |        |    |             |        |     |               |            |            |       |            |           |       |         |            |            |            |            |         |
|------------|------------|-------------------|--------|----|-------------|--------|-----|---------------|------------|------------|-------|------------|-----------|-------|---------|------------|------------|------------|------------|---------|
| VPS29      | rs4766497  | VC:Hunt           | 2.E-13 | 12 | 109,434,759 | no     | yes | 10025904743   | 1.61E-13   | rs4766497  | same  | 0.887      | rs3026445 | 24    | ATP2A2  | 9.8E-09    | rs4766497  | 1.9E-06    | rs4766497  | 1.9E-06 |
| VPS29      | rs6606686  | PFC:Alzh          | 6.E-13 | 12 | 109,387,763 | no     | yes | 10025904743   | 2.63E-30   | rs4766497  | 0.813 | 0.855      | rs3026445 | 24    | ATP2A2  | 9.8E-09    | rs6606686  | 1.8E-07    | rs4766497  | 1.9E-06 |
| VPS29      | rs4766497  | VC:Norm           | 2.E-12 | 12 | 109,434,759 | no     | yes | 10025904743   | 2.17E-12   | rs4766497  | same  | 0.887      | rs3026445 | 24    | ATP2A2  | 9.8E-09    | rs4766497  | 1.9E-06    | rs4766497  | 1.9E-06 |
| VPS29      | rs4766497  | CR:Norm           | 2.E-11 | 12 | 109,434,759 | no     | yes | 10025904743   | 2.33E-11   | rs4766497  | same  | 0.887      | rs3026445 | 24    | ATP2A2  | 9.8E-09    | rs4766497  | 1.9E-06    | rs4766497  | 1.9E-06 |
| VPS29      | rs6606686  | VC:Alzh           | 2.E-09 | 12 | 109,387,763 | no     | yes | 10025904743   | 2.60E-16   | rs4766497  | 0.813 | 0.855      | rs3026445 | 24    | ATP2A2  | 9.8E-09    | rs6606686  | 1.8E-07    | rs4766497  | 1.9E-06 |
| ANKRD9     | rs1190554  | omental           | 4.E-49 | 14 | 101,988,439 | lowest | yes | 10023819395   | 4.14E-49   | rs1190554  | same  | 1          | rs2273905 | 26    | ANKRD9  | 4.8E-11    | rs1190554  | 1.5E-09    | rs1190554  | 1.5E-09 |
| ANKRD9     | rs1190554  | SubCutAdipose(Gre | 2.E-43 | 14 | 101,988,439 | no     | yes | 10023819395   | 2.39E-43   | rs1190554  | same  | 1          | rs2273905 | 26    | ANKRD9  | 4.8E-11    | rs1190554  | 1.5E-09    | rs1190554  | 1.5E-09 |
| ANKRD9     | rs1190554  | Liver(Greenawalt) | 4.E-33 | 14 | 101,988,439 | no     | yes | 10023819395   | 4.26E-33   | rs1190554  | same  | 1          | rs2273905 | 26    | ANKRD9  | 4.8E-11    | rs1190554  | 1.5E-09    | rs1190554  | 1.5E-09 |
| ANKRD9     | rs4906205  | Blood(Fehrmann et | 4.E-32 | 14 | 102,002,200 | no     | yes | 7050370       | 4.30E-32   | rs4906205  | same  | 1          | rs2273905 | 26    | ANKRD9  | 4.8E-11    | rs4906205  | 9.9E-10    | rs4906205  | 9.9E-10 |
| ANKRD9     | rs12586673 | Blood(Fehrmann et | 4.E-24 | 14 | 101,897,396 | no     | yes | 7050370       | 4.30E-32   | rs4906205  | 0.853 | 0.853      | rs2273905 | 26    | ANKRD9  | 4.8E-11    | rs12586673 | 1.2E-07    | rs4906205  | 9.9E-10 |
| ANKRD9     | rs4906205  | PFC:All           | 6.E-19 | 14 | 102,002,200 | no     | yes | 10023819395   | 6.44E-19   | rs4906205  | same  | 1          | rs2273905 | 26    | ANKRD9  | 4.8E-11    | rs4906205  | 9.9E-10    | rs4906205  | 9.9E-10 |
| ANKRD9     | rs1190554  | PFC:Norm          | 9.E-11 | 14 | 101,988,439 | no     | yes | 10023819395   | 9.43E-11   | rs1190554  | same  | 1          | rs2273905 | 26    | ANKRD9  | 4.8E-11    | rs1190554  | 1.5E-09    | rs1190554  | 1.5E-09 |
| ANKRD9     | rs11704    | PFC:All           | 1.E-09 | 14 | 101,878,408 | no     | yes | 10023819395   | 6.44E-19   | rs4906205  | 0.819 | 0.819      | rs2273905 | 26    | ANKRD9  | 4.8E-11    | rs11704    | 4.1E-08    | rs4906205  | 9.9E-10 |
| ANKRD9     | rs1190554  | VC:All            | 3.E-09 | 14 | 101,988,439 | no     | yes | 10023819395   | 3.09E-09   | rs1190554  | same  | 1          | rs2273905 | 26    | ANKRD9  | 4.8E-11    | rs1190554  | 1.5E-09    | rs1190554  | 1.5E-09 |
| ANKRD9     | rs1190554  | PFC:Alzh          | 3.E-08 | 14 | 101,988,439 | no     | yes | 10023819395   | 3.21E-08   | rs1190554  | same  | 1          | rs2273905 | 26    | ANKRD9  | 4.8E-11    | rs1190554  | 1.5E-09    | rs1190554  | 1.5E-09 |
| ANKRD9     | rs1190554  | SchadtLiver       | 3.E-08 | 14 | 101,988,439 | no     | yes | 10023819395   | 3.26E-08   | rs1190554  | same  | 1          | rs2273905 | 26    | ANKRD9  | 4.8E-11    | rs1190554  | 1.5E-09    | rs1190554  | 1.5E-09 |
| hCT2287249 | rs3105591  | omental           | 8.E-16 | 15 | 48,656,334  | lowest | yes | 10025928787   | 8.38E-16   | rs3105591  | same  | 1          | rs3105593 | 27    | TRPM7   | 2.7E-12    | rs3105591  | 1.3E-07    | rs3105591  | 1.3E-07 |
| hCT2287249 | rs2630     | PFC:All           | 4.E-12 | 15 | 48,636,691  | no     | yes | 10025928787   | 3.82E-12   | rs2630     | same  | 1          | rs3105593 | 27    | TRPM7   | 2.7E-12    | rs2630     | 2.8E-07    | rs2630     | 2.8E-07 |
| hCT2287249 | rs2630     | CR:All            | 7.E-10 | 15 | 48,636,691  | no     | yes | 10025928787   | 7.04E-10   | rs2630     | same  | 1          | rs3105593 | 27    | TRPM7   | 2.7E-12    | rs2630     | 2.8E-07    | rs2630     | 2.8E-07 |
| hCT2287249 | rs2630     | SubCutAdipose(Gre | 3.E-09 | 15 | 48,636,691  | no     | yes | 10025928787   | 3.18E-09   | rs2630     | same  | 1          | rs3105593 | 27    | TRPM7   | 2.7E-12    | rs2630     | 2.8E-07    | rs2630     | 2.8E-07 |
| TRPM7      | rs3105593  | Lymph             | 6.E-15 | 15 | 48,632,310  | lowest | no  | GI_29893551-S | 1.97E-22   | rs473357   | 0.563 | same       | rs3105593 | 27    | TRPM7   | 2.7E-12    | rs3105593  | 2.7E-12    | rs473357   | 2.6E-07 |
| TRPM7      | rs3131576  | Lymph             | 2.E-14 | 15 | 48,650,950  | no     | no  | GI_29893551-S | 1.97E-22   | rs473357   | 0.604 | 1          | rs3105593 | 27    | TRPM7   | 2.7E-12    | rs3131576  | 4.0E-12    | rs473357   | 2.6E-07 |
| TRPM7      | rs3105591  | Lymph             | 2.E-10 | 15 | 48,656,334  | no     | no  | GI_29893551-S | 1.97E-22   | rs473357   | 0.563 | 1          | rs3105593 | 27    | TRPM7   | 2.7E-12    | rs3105591  | 1.3E-07    | rs473357   | 2.6E-07 |
| TRPM7      | rs2630     | Lymph             | 4.E-10 | 15 | 48,636,691  | no     | no  | GI_29893551-S | 1.97E-22   | rs473357   | 0.563 | 1          | rs3105593 | 27    | TRPM7   | 2.7E-12    | rs2630     | 2.8E-07    | rs473357   | 2.6E-07 |
| LITAF      | rs12444261 | Monocytes         | 7.E-78 | 16 | 11,642,143  | lowest | no  | 6.09E-109     | rs12446552 | 0.395      | same  | rs12444261 | 29        | LITAF | 1.8E-12 | rs12444261 | 1.8E-12    | rs12446552 | 1.2E-09    |         |
| LITAF      | rs933572   | Monocytes         | 1.E-70 | 16 | 11,664,592  | no     | no  | 6.09E-109     | rs12446552 | 0.361      | 0.806 | rs12444261 | 29        | LITAF | 1.8E-12 | rs933572   | 3.0E-01    | rs12446552 | 1.2E-09    |         |
| LITAF      | rs7191330  | Monocytes         | 3.E-28 | 16 | 11,600,159  | no     | no  | 6.09E-109     | rs12446552 | 0.09       | 0.95  | rs735951   | 29        | LITAF | 3.8E-28 | rs7191330  | 6.5E-01    | rs12446552 | 1.2E-09    |         |
| CNOT1      | rs246258   | Monocytes         | 7.E-23 | 16 | 57,136,775  | lowest | yes | 6.94E-23      | rs246258   | same       | 1     | rs246196   | 31        | CNOT1 | 2.6E-57 | rs246258   | 3.0E-57    | rs246258   | 3.0E-57    |         |
| CNOT1      | rs37060    | Monocytes         | 1.E-22 | 16 | 57,123,805  | no     | yes | 6.94E-23      | rs246258   | 1          | 1     | rs246196   | 31        | CNOT1 | 2.6E-57 | rs37060    | 2.3E-57    | rs246258   | 3.0E-57    |         |
| CNOT1      | rs7199856  | Monocytes         | 1.E-21 | 16 | 57,142,273  | no     | yes | 6.94E-23      | rs246258   | 1          | 1     | rs246196   | 31        | CNOT1 | 2.6E-57 | rs7199856  | 3.7E-57    | rs246258   | 3.0E-57    |         |
| NDRG4      | rs37060    | CR:All            | 3.E-38 | 16 | 57,123,805  | lowest | yes | 10025905416   | 2.60E-38   | rs37060    | same  | 1          | rs246196  | 31    | CNOT1   | 2.6E-57    | rs37060    | 2.3E-57    | rs37060    | 2.3E-57 |
| NDRG4      | rs37060    | PFC:All           | 5.E-38 | 16 | 57,123,805  | no     | yes | 10025905416   | 5.48E-38   | rs37060    | same  | 1          | rs246196  | 31    | CNOT1   | 2.6E-57    | rs37060    | 2.3E-57    | rs37060    | 2.3E-57 |
| NDRG4      | rs1549607  | VC:All            | 4.E-18 | 16 | 57,141,476  | no     | yes | 10025905416   | 3.55E-18   | rs1549607  | same  | 1          | rs246196  | 31    | CNOT1   | 2.6E-57    | rs1549607  | 2.6E-57    | rs1549607  | 2.6E-57 |
| NDRG4      | rs37060    | CR:Alzh           | 1.E-15 | 16 | 57,123,805  | no     | yes | 10025905416   | 9.91E-16   | rs37060    | same  | 1          | rs246196  | 31    | CNOT1   | 2.6E-57    | rs37060    | 2.3E-57    | rs37060    | 2.3E-57 |
| NDRG4      | rs37060    | PFC:Norm          | 2.E-14 | 16 | 57,123,805  | no     | yes | 10025905416   | 1.69E-14   | rs37060    | same  | 1          | rs246196  | 31    | CNOT1   | 2.6E-57    | rs37060    | 2.3E-57    | rs37060    | 2.3E-57 |
| NDRG4      | rs37060    | PFC:Alzh          | 2.E-14 | 16 | 57,123,805  | no     | yes | 10025905416   | 2.10E-14   | rs37060    | same  | 1          | rs246196  | 31    | CNOT1   | 2.6E-57    | rs37060    | 2.3E-57    | rs37060    | 2.3E-57 |
| NDRG4      | rs1549607  | CR:Hunt           | 3.E-14 | 16 | 57,141,476  | no     | yes | 10025905416   | 3.30E-14   | rs1549607  | same  | 1          | rs246196  | 31    | CNOT1   | 2.6E-57    | rs1549607  | 2.6E-57    | rs1549607  | 2.6E-57 |
| NDRG4      | rs1549607  | PFC:Hunt          | 2.E-12 | 16 | 57,141,476  | no     | yes | 10025905416   | 1.59E-12   | rs1549607  | same  | 1          | rs246196  | 31    | CNOT1   | 2.6E-57    | rs1549607  | 2.6E-57    | rs1549607  | 2.6E-57 |
| NDRG4      | rs37060    | CR:Norm           | 5.E-09 | 16 | 57,123,805  | no     | yes | 10025905416   | 5.10E-09   | rs37060    | same  | 1          | rs246196  | 31    | CNOT1   | 2.6E-57    | rs37060    | 2.3E-57    | rs37060    | 2.3E-57 |
| SETD6      | rs37060    | Blood(Fehrmann et | 1.E-24 | 16 | 57,123,805  | lowest | no  | 6520382       | 5.10E-28   | rs11866002 | 0.183 | 1          | rs246196  | 31    | CNOT1   | 2.6E-57    | rs37060    | 2.3E-57    | rs11866002 | 4.6E-10 |
| SETD6      | rs1549607  | Blood(Fehrmann et | 1.E-24 | 16 | 57,141,476  | lowest | no  | 6520382       | 5.10E-28   | rs11866002 | 0.183 | 1          | rs246196  | 31    | CNOT1   | 2.6E-57    | rs1549607  | 2.6E-57    | rs11866002 | 4.6E-10 |
| SETD6      | rs4784051  | Liver(UChicago)   | <1E-16 | 16 | 57,195,029  | no     | yes | A_23_1P29358  | <1E-16     | rs4784051  | same  | 1          | rs246196  | 31    | CNOT1   | 2.6E-57    | rs4784051  | 6.1E-56    | rs4784051  | 6.1E-56 |
| CCT6B      | rs12948362 | Monocytes         | 3.E-14 | 17 | 30,356,742  | lowest | no  | 1.43E-17      | rs2074519  | 0.765      | 1     | rs1052536  | 32        | LIG3  | 3.0E-24 | rs12948362 | 7.6E-24    | rs2074519  | 1.8E-17    |         |
| CCT6B      | rs1052536  | Monocytes         | 3.E-14 | 17 | 30,355,688  | no     | no  | 1.43E-17      | rs2074519  | 0.765      | same  | rs1052536  | 32        | LIG3  | 3.0E-24 | rs1052536  | 3.0E-24    | rs2074519  | 1.8E-17    |         |
| LIG3       | rs12948362 | Monocytes         | 4.E-66 | 17 | 30,356,742  | lowest | yes | 3.57E-66      | rs12948362 | same       | 1     | rs1052536  | 32        | LIG3  | 3.0E-24 | rs12948362 | 7.6E-24    | rs12948362 | 7.6E-24    |         |
| LIG3       | rs1052536  | Monocytes         | 5.E-66 | 17 | 30,355,688  | no     | yes | 3.57E-66      | rs12948362 | 1          | same  | rs1052536  | 32        | LIG3  | 3.0E-24 | rs1052536  | 3.0E-24    | rs12948362 | 7.6E-24    |         |
| LIG3       | rs1634800  | PFC:All           | 7.E-40 | 17 | 30,407,143  | no     | yes | 7.43E-40      | rs1634800  | same       | 0.983 | rs1052536  | 32        | LIG3  | 3.0E-24 | rs1634800  | 6.4E-24    | rs1634800  | 6.4E-24    |         |
| LIG3       | rs1634800  | omental           | 2.E-37 | 17 | 30,407,143  | no     | yes | 1.58E-37      | rs1634800  | same       | 0.983 | rs1052536  | 32        | LIG3  | 3.0E-24 | rs1634800  | 6.4E-24    | rs1634800  | 6.4E-24    |         |
| LIG3       | rs797989   | Blood(Fehrmann et | 7.E-30 | 17 | 30,438,871  | no     | yes | 3460431       | 7.10E-30   | rs797989   | same  | 1          | rs1052536 | 32    | LIG3    | 3.0E-24    | rs797989   | 4.5E-23    | rs797989   | 4.5E-23 |
| LIG3       | rs1634800  | SubCutAdipose(Gre | 4.E-29 | 17 | 30,407,143  | no     | yes | 10025907314   | 4.44E-29   | rs1634800  | same  | 0.983      | rs1052536 | 32    | LIG3    | 3.0E-24    | rs1634800  | 6.4E-24    | rs1634800  | 6.4E-24 |
| LIG3       | rs797989   | VC:All            | 9.E-25 | 17 | 30,438,871  | no     | yes | 10025907314   | 8.94E-25   | rs797989   | same  | 1          | rs1052536 | 32    | LIG3    | 3.0E-24    | rs797989   | 4.5E-23    | rs797989   | 4.5E-23 |
| LIG3       | rs3135967  | PFC:All           | 1.E-22 | 17 | 30,337,842  | no     | yes | 10025907314   | 7.43E-40   | rs1634800  | 0.934 | 0.967      | rs1052536 | 32    | LIG3    | 3.0E-24    | rs3135967  | 3.7E-23    | rs1634800  | 6.4E-24 |
| LIG3       | rs797989   | CR:All            | 2.E-20 | 17 | 30,438,871  | no     | yes | 10025907314   | 2.40E-20   | rs797989   | same  | 1          | rs1052536 | 32    | LIG3    | 3.0E-24    | rs797989   | 4.5E-23    | rs797989   | 4.5E-23 |
| LIG3       | rs1634800  | PFC:Alzh          | 1.E-18 | 17 | 30,407,143  | no     | yes | 10025907314   | 1.27E-18   | rs1634800  | same  | 0.983      | rs1052536 | 32    | LIG3    | 3.0E-24    | rs1634800  | 6.4E-24    | rs1634800  | 6.4E-24 |
| LIG3       | rs797989   | Liver(Greenawalt) | 2.E-14 | 17 | 30,438,871  | no     | yes | 10025907314   | 2.18E-14   | rs797989   | same  | 1          | rs1052536 | 32    | LIG3    | 3.0E-24    | rs797989   | 4.5E-23    | rs797989   | 4.5E-23 |
| LIG3       | rs1634800  | PFC:Norm          | 2.E-13 | 17 | 30,407,143  | no     | yes | 10025907314   | 1.61E-13   | rs1634800  | same  | 0.983      | rs1052536 | 32    | LIG3    | 3.0E-24    | rs1634800  | 6.4E-24    | rs1634800  | 6.4E-24 |
| LIG3       | rs3135967  | VC:All            | 1.E-12 | 17 | 30,337,842  | no     | yes | 10025907314   | 8.94E-25   | rs797989   |       |            |           |       |         |            |            |            |            |         |

|      |            |             |        |    |            |    |     |              |          |           |       |       |           |    |      |         |            |         |           |         |
|------|------------|-------------|--------|----|------------|----|-----|--------------|----------|-----------|-------|-------|-----------|----|------|---------|------------|---------|-----------|---------|
| LIG3 | rs2339122  | FrontalCtx  | 2.E-11 | 17 | 30,406,914 | no | yes | ILMN_1660582 | 2.28E-11 | rs797989  | 0.87  | 1     | rs1052536 | 32 | LIG3 | 3.0E-24 | rs2339122  | 9.4E-24 | rs797989  | 4.5E-23 |
| LIG3 | rs1634800  | FrontalCtx  | 2.E-11 | 17 | 30,407,143 | no | yes | ILMN_1660582 | 2.28E-11 | rs797989  | 0.936 | 0.983 | rs1052536 | 32 | LIG3 | 3.0E-24 | rs1634800  | 6.4E-24 | rs797989  | 4.5E-23 |
| LIG3 | rs3135967  | FrontalCtx  | 8.E-11 | 17 | 30,337,842 | no | yes | ILMN_1660582 | 2.28E-11 | rs797989  | 0.936 | 0.967 | rs1052536 | 32 | LIG3 | 3.0E-24 | rs3135967  | 3.7E-23 | rs797989  | 4.5E-23 |
| LIG3 | rs2074518  | Cerebellum2 | 1.E-10 | 17 | 30,348,495 | no | yes | ILMN_1660582 | 1.40E-10 | rs1003918 | 0.967 | 1     | rs1052536 | 32 | LIG3 | 3.0E-24 | rs2074518  | 2.3E-23 | rs1003918 | 9.4E-24 |
| LIG3 | rs1052536  | Cerebellum2 | 1.E-10 | 17 | 30,355,688 | no | yes | ILMN_1660582 | 1.40E-10 | rs1003918 | 1     | same  | rs1052536 | 32 | LIG3 | 3.0E-24 | rs1052536  | 3.0E-24 | rs1003918 | 9.4E-24 |
| LIG3 | rs1003918  | Cerebellum2 | 1.E-10 | 17 | 30,356,290 | no | yes | ILMN_1660582 | 1.40E-10 | rs1003918 | same  | 1     | rs1052536 | 32 | LIG3 | 3.0E-24 | rs1003918  | 9.4E-24 | rs1003918 | 9.4E-24 |
| LIG3 | rs12948362 | Cerebellum2 | 1.E-10 | 17 | 30,356,742 | no | yes | ILMN_1660582 | 1.40E-10 | rs1003918 | 1     | 1     | rs1052536 | 32 | LIG3 | 3.0E-24 | rs12948362 | 7.6E-24 | rs1003918 | 9.4E-24 |
| LIG3 | rs2339122  | Cerebellum2 | 1.E-10 | 17 | 30,406,914 | no | yes | ILMN_1660582 | 1.40E-10 | rs1003918 | 0.905 | 1     | rs1052536 | 32 | LIG3 | 3.0E-24 | rs2339122  | 9.4E-24 | rs1003918 | 9.4E-24 |
| LIG3 | rs1634800  | Cerebellum2 | 1.E-10 | 17 | 30,407,143 | no | yes | ILMN_1660582 | 1.40E-10 | rs1003918 | 0.967 | 0.983 | rs1052536 | 32 | LIG3 | 3.0E-24 | rs1634800  | 6.4E-24 | rs1003918 | 9.4E-24 |
| LIG3 | rs3135967  | CR:All      | 2.E-10 | 17 | 30,337,842 | no | yes | 10025907314  | 2.40E-20 | rs797989  | 0.936 | 0.967 | rs1052536 | 32 | LIG3 | 3.0E-24 | rs3135967  | 3.7E-23 | rs797989  | 4.5E-23 |
| LIG3 | rs1634800  | VC:Alzh     | 2.E-10 | 17 | 30,407,143 | no | yes | 10025907314  | 1.61E-10 | rs1634800 | same  | 0.983 | rs1052536 | 32 | LIG3 | 3.0E-24 | rs1634800  | 6.4E-24 | rs1634800 | 6.4E-24 |
| LIG3 | rs10853174 | FrontalCtx  | 2.E-10 | 17 | 30,376,030 | no | yes | ILMN_1660582 | 2.28E-11 | rs797989  | 0.967 | 1     | rs1052536 | 32 | LIG3 | 3.0E-24 | rs10853174 | 1.1E-21 | rs797989  | 4.5E-23 |
| LIG3 | rs797989   | Cerebellum2 | 3.E-10 | 17 | 30,438,871 | no | yes | ILMN_1660582 | 1.40E-10 | rs1003918 | 0.967 | 1     | rs1052536 | 32 | LIG3 | 3.0E-24 | rs797989   | 4.5E-23 | rs1003918 | 9.4E-24 |
| LIG3 | rs3135967  | Cerebellum2 | 1.E-09 | 17 | 30,337,842 | no | yes | ILMN_1660582 | 1.40E-10 | rs1003918 | 0.967 | 0.967 | rs1052536 | 32 | LIG3 | 3.0E-24 | rs3135967  | 3.7E-23 | rs1003918 | 9.4E-24 |
| LIG3 | rs10853174 | Cerebellum2 | 2.E-09 | 17 | 30,376,030 | no | yes | ILMN_1660582 | 1.40E-10 | rs1003918 | 1     | 1     | rs1052536 | 32 | LIG3 | 3.0E-24 | rs10853174 | 1.1E-21 | rs1003918 | 9.4E-24 |
| LIG3 | rs1634800  | VC:Norm     | 2.E-09 | 17 | 30,407,143 | no | yes | 10025907314  | 2.27E-09 | rs1634800 | same  | 0.983 | rs1052536 | 32 | LIG3 | 3.0E-24 | rs1634800  | 6.4E-24 | rs1634800 | 6.4E-24 |
| LIG3 | rs1634800  | CR:Norm     | 2.E-09 | 17 | 30,407,143 | no | yes | 10025907314  | 2.47E-09 | rs1634800 | same  | 0.983 | rs1052536 | 32 | LIG3 | 3.0E-24 | rs1634800  | 6.4E-24 | rs1634800 | 6.4E-24 |
| LIG3 | rs2074518  | TemporalCtx | 9.E-09 | 17 | 30,348,495 | no | yes | ILMN_1660582 | 8.85E-09 | rs1003918 | 0.967 | 1     | rs1052536 | 32 | LIG3 | 3.0E-24 | rs2074518  | 2.3E-23 | rs1003918 | 9.4E-24 |
| LIG3 | rs1052536  | TemporalCtx | 9.E-09 | 17 | 30,355,688 | no | yes | ILMN_1660582 | 8.85E-09 | rs1003918 | 1     | same  | rs1052536 | 32 | LIG3 | 3.0E-24 | rs1052536  | 3.0E-24 | rs1003918 | 9.4E-24 |
| LIG3 | rs1003918  | TemporalCtx | 9.E-09 | 17 | 30,356,290 | no | yes | ILMN_1660582 | 8.85E-09 | rs1003918 | same  | 1     | rs1052536 | 32 | LIG3 | 3.0E-24 | rs1003918  | 9.4E-24 | rs1003918 | 9.4E-24 |
| LIG3 | rs12948362 | TemporalCtx | 9.E-09 | 17 | 30,356,742 | no | yes | ILMN_1660582 | 8.85E-09 | rs1003918 | 1     | 1     | rs1052536 | 32 | LIG3 | 3.0E-24 | rs12948362 | 7.6E-24 | rs1003918 | 9.4E-24 |
| LIG3 | rs2339122  | TemporalCtx | 9.E-09 | 17 | 30,406,914 | no | yes | ILMN_1660582 | 8.85E-09 | rs1003918 | 0.905 | 1     | rs1052536 | 32 | LIG3 | 3.0E-24 | rs2339122  | 9.4E-24 | rs1003918 | 9.4E-24 |
| LIG3 | rs1634800  | TemporalCtx | 9.E-09 | 17 | 30,407,143 | no | yes | ILMN_1660582 | 8.85E-09 | rs1003918 | 0.967 | 0.983 | rs1052536 | 32 | LIG3 | 3.0E-24 | rs1634800  | 6.4E-24 | rs1003918 | 9.4E-24 |
| LIG3 | rs797989   | CR:Alzh     | 2.E-08 | 17 | 30,438,871 | no | yes | 10025907314  | 1.62E-08 | rs797989  | same  | 1     | rs1052536 | 32 | LIG3 | 3.0E-24 | rs797989   | 4.5E-23 | rs797989  | 4.5E-23 |
| LIG3 | rs797989   | CR:All      | 2.E-08 | 17 | 30,438,871 | no | yes | 10023820814  | 2.40E-20 | rs797989  | same  | 1     | rs1052536 | 32 | LIG3 | 3.0E-24 | rs797989   | 4.5E-23 | rs797989  | 4.5E-23 |
| LIG3 | rs797989   | TemporalCtx | 2.E-08 | 17 | 30,438,871 | no | yes | ILMN_1660582 | 8.85E-09 | rs1003918 | 0.967 | 1     | rs1052536 | 32 | LIG3 | 3.0E-24 | rs797989   | 4.5E-23 | rs1003918 | 9.4E-24 |
| LIG3 | rs10853174 | TemporalCtx | 2.E-08 | 17 | 30,376,030 | no | yes | ILMN_1660582 | 8.85E-09 | rs1003918 | 1     | 1     | rs1052536 | 32 | LIG3 | 3.0E-24 | rs10853174 | 1.1E-21 | rs1003918 | 9.4E-24 |
| LIG3 | rs797989   | PFC:Hunt    | 3.E-08 | 17 | 30,438,871 | no | yes | 10025907314  | 2.50E-08 | rs797989  | same  | 1     | rs1052536 | 32 | LIG3 | 3.0E-24 | rs797989   | 4.5E-23 | rs797989  | 4.5E-23 |



Supplementary Table 13 (16 pages): QT SNP relationship to left ventricular enhancers. Shown in the table are the set of 68 independent QT interval-associated SNPs (lead SNPs), as well as all SNPs in LD ( $r_2 > 0.8$  in 100Genomes CEU), including their QT association p-value and the presence (1) or absence (0) of an overlying enhancer in left ventricular tissue, or secondarily, 123 non-cardiac tissues or fetal heart, right atrium or right ventricle.

| LD SNP ( $r_2 > 0.8$ ) | lead SNP   | Index/OtherSignal | Locus # | Nearest gene | QT P value  | r2 (1000 Genomes, CEU Phase 1) |   | # Non-Cardiac Tissues Overlapped (123 non-cardiac tissues) | Fetal Heart | Right Atrium | Right Ventricle |
|------------------------|------------|-------------------|---------|--------------|-------------|--------------------------------|---|------------------------------------------------------------|-------------|--------------|-----------------|
|                        |            |                   |         |              |             | Left Ventricle                 |   |                                                            |             |              |                 |
| rs11583631             | rs2273042  | OTHERSIGNAL       | 1       | RNF207       | -           | 0.98                           | 0 | 0                                                          | 3           | 0            | 0               |
| rs11584419             | rs2273042  | OTHERSIGNAL       | 1       | RNF207       | -           | 0.99                           | 0 | 0                                                          | 3           | 0            | 0               |
| rs11586626             | rs2273042  | OTHERSIGNAL       | 1       | RNF207       | -           | 0.86                           | 0 | 0                                                          | 7           | 0            | 0               |
| rs12128870             | rs2273042  | OTHERSIGNAL       | 1       | RNF207       | -           | 0.85                           | 0 | 0                                                          | 13          | 0            | 0               |
| rs200114858            | rs2273042  | OTHERSIGNAL       | 1       | RNF207       | -           | 0.83                           | 0 | 0                                                          | 0           | 0            | 0               |
| rs2273042              | rs2273042  | OTHERSIGNAL       | 1       | RNF207       | 6.7986E-09  | 1.00                           | 0 | 0                                                          | 0           | 0            | 0               |
| rs2273043              | rs2273042  | OTHERSIGNAL       | 1       | RNF207       | 0.90368     | 0.99                           | 0 | 0                                                          | 0           | 0            | 0               |
| rs2281304              | rs2273042  | OTHERSIGNAL       | 1       | RNF207       | 0.88588     | 0.99                           | 0 | 0                                                          | 2           | 0            | 0               |
| rs2294935              | rs2273042  | OTHERSIGNAL       | 1       | RNF207       | 0.95725     | 0.96                           | 0 | 0                                                          | 6           | 0            | 0               |
| rs3789530              | rs2273042  | OTHERSIGNAL       | 1       | RNF207       | 3.2947E-08  | 0.95                           | 0 | 0                                                          | 0           | 0            | 0               |
| rs749435               | rs2273042  | OTHERSIGNAL       | 1       | RNF207       | 0.88416     | 0.93                           | 0 | 0                                                          | 0           | 0            | 0               |
| rs846111               | rs846111   | INDEX             | 1       | RNF207       | 7.39E-40    | 1.00                           | 0 | 0                                                          | 7           | 0            | 0               |
| rs2298632              | rs2298632  | INDEX             | 2       | TCEA3        | 1.3801E-14  | 1.00                           | 0 | 0                                                          | 23          | 0            | 1               |
| rs10753778             | rs3934467  | OTHERSIGNAL       | 3       | NOS1AP       | -           | 0.96                           | 0 | 0                                                          | 5           | 0            | 0               |
| rs10800352             | rs3934467  | OTHERSIGNAL       | 3       | NOS1AP       | 2.54E-128   | 0.98                           | 0 | 0                                                          | 2           | 0            | 0               |
| rs10918438             | rs6669543  | OTHERSIGNAL       | 3       | NOS1AP       | -           | 0.82                           | 0 | 0                                                          | 1           | 0            | 0               |
| rs10918571             | rs12143842 | INDEX             | 3       | NOS1AP       | -           | 0.86                           | 0 | 0                                                          | 0           | 0            | 0               |
| rs10918856             | rs3934467  | OTHERSIGNAL       | 3       | NOS1AP       | 0.000064368 | 0.99                           | 1 | 0                                                          | 20          | 0            | 1               |
| rs10918859             | rs3934467  | OTHERSIGNAL       | 3       | NOS1AP       | 9.96E-111   | 0.82                           | 0 | 0                                                          | 12          | 0            | 0               |
| rs10918883             | rs4657172  | OTHERSIGNAL       | 3       | NOS1AP       | -           | 1.00                           | 0 | 0                                                          | 8           | 0            | 0               |
| rs10918963             | rs3934467  | OTHERSIGNAL       | 3       | NOS1AP       | 1.73E-114   | 0.89                           | 0 | 0                                                          | 2           | 0            | 0               |
| rs10918974             | rs3934467  | OTHERSIGNAL       | 3       | NOS1AP       | 2.47E-113   | 0.89                           | 0 | 0                                                          | 11          | 1            | 0               |
| rs10918998             | rs3934467  | OTHERSIGNAL       | 3       | NOS1AP       | -           | 0.87                           | 0 | 0                                                          | 14          | 0            | 0               |
| rs111479472            | rs4657172  | OTHERSIGNAL       | 3       | NOS1AP       | -           | 0.95                           | 0 | 0                                                          | 10          | 0            | 0               |
| rs111718793            | rs4657172  | OTHERSIGNAL       | 3       | NOS1AP       | -           | 1.00                           | 0 | 0                                                          | 0           | 0            | 0               |
| rs113577901            | rs4657172  | OTHERSIGNAL       | 3       | NOS1AP       | -           | 0.99                           | 0 | 0                                                          | 0           | 0            | 0               |
| rs11589974             | rs164133   | OTHERSIGNAL       | 3       | NOS1AP       | -           | 0.98                           | 0 | 0                                                          | 0           | 0            | 0               |
| rs12025136             | rs6669543  | OTHERSIGNAL       | 3       | NOS1AP       | 1.44E-38    | 0.91                           | 1 | 0                                                          | 6           | 1            | 1               |
| rs12027785             | rs3934467  | OTHERSIGNAL       | 3       | NOS1AP       | 5.37E-129   | 0.99                           | 0 | 0                                                          | 11          | 0            | 0               |
| rs12036340             | rs12143842 | INDEX             | 3       | NOS1AP       | 4.01E-196   | 0.86                           | 0 | 0                                                          | 0           | 0            | 0               |
| rs12042862             | rs12143842 | INDEX             | 3       | NOS1AP       | -           | 0.96                           | 0 | 0                                                          | 0           | 0            | 0               |
| rs12064639             | rs4657172  | OTHERSIGNAL       | 3       | NOS1AP       | 2.4258E-08  | 1.00                           | 1 | 0                                                          | 41          | 0            | 0               |
| rs12116744             | rs3934467  | OTHERSIGNAL       | 3       | NOS1AP       | 1.82E-128   | 0.99                           | 1 | 0                                                          | 13          | 0            | 1               |
| rs12123267             | rs3934467  | OTHERSIGNAL       | 3       | NOS1AP       | 1.37E-125   | 0.96                           | 0 | 0                                                          | 8           | 0            | 0               |
| rs12124745             | rs3934467  | OTHERSIGNAL       | 3       | NOS1AP       | 0.000040916 | 0.97                           | 0 | 0                                                          | 12          | 0            | 0               |
| rs12143842             | rs12143842 | INDEX             | 3       | NOS1AP       | 1.32E-213   | 1.00                           | 0 | 0                                                          | 2           | 0            | 0               |
| rs12567315             | rs3934467  | OTHERSIGNAL       | 3       | NOS1AP       | 3.26E-129   | 0.99                           | 0 | 0                                                          | 24          | 0            | 1               |
| rs146475167            | rs12143842 | INDEX             | 3       | NOS1AP       | -           | 0.95                           | 0 | 0                                                          | 0           | 0            | 0               |
| rs148349069            | rs3934467  | OTHERSIGNAL       | 3       | NOS1AP       | -           | 0.90                           | 0 | 0                                                          | 2           | 0            | 0               |
| rs148900636            | rs3934467  | OTHERSIGNAL       | 3       | NOS1AP       | -           | 0.92                           | 0 | 0                                                          | 13          | 0            | 0               |
| rs164131               | rs164133   | OTHERSIGNAL       | 3       | NOS1AP       | -           | 0.87                           | 0 | 0                                                          | 1           | 0            | 0               |
| rs164133               | rs164133   | OTHERSIGNAL       | 3       | NOS1AP       | 2.9914E-11  | 1.00                           | 0 | 0                                                          | 1           | 0            | 0               |
| rs164134               | rs164133   | OTHERSIGNAL       | 3       | NOS1AP       | 0.0050804   | 1.00                           | 0 | 0                                                          | 1           | 0            | 0               |
| rs164136               | rs164133   | OTHERSIGNAL       | 3       | NOS1AP       | 0.020599    | 0.89                           | 0 | 0                                                          | 1           | 0            | 0               |
| rs164137               | rs164133   | OTHERSIGNAL       | 3       | NOS1AP       | -           | 1.00                           | 0 | 0                                                          | 1           | 0            | 0               |
| rs164406               | rs164133   | OTHERSIGNAL       | 3       | NOS1AP       | -           | 0.99                           | 0 | 0                                                          | 1           | 0            | 0               |
| rs164410               | rs164133   | OTHERSIGNAL       | 3       | NOS1AP       | 5.3643E-10  | 0.87                           | 0 | 0                                                          | 2           | 0            | 0               |
| rs164411               | rs164133   | OTHERSIGNAL       | 3       | NOS1AP       | 0.01918     | 0.87                           | 0 | 0                                                          | 2           | 0            | 0               |
| rs16847548             | rs12143842 | INDEX             | 3       | NOS1AP       | 1.12E-168   | 0.84                           | 0 | 0                                                          | 15          | 0            | 1               |
| rs16857031             | rs16857031 | OTHERSIGNAL       | 3       | NOS1AP       | 6.45E-61    | 1.00                           | 0 | 0                                                          | 18          | 0            | 0               |
| rs17457880             | rs17457880 | OTHERSIGNAL       | 3       | NOS1AP       | 2.8067E-10  | 0.96                           | 1 | 0                                                          | 23          | 0            | 1               |
| rs17460657             | rs17460657 | OTHERSIGNAL       | 3       | NOS1AP       | 2.72E-16    | 1.00                           | 0 | 0                                                          | 6           | 0            | 0               |
| rs183024               | rs164133   | OTHERSIGNAL       | 3       | NOS1AP       | -           | 0.87                           | 0 | 0                                                          | 10          | 0            | 0               |
| rs2250489              | rs164133   | OTHERSIGNAL       | 3       | NOS1AP       | 0.0050804   | 0.98                           | 0 | 0                                                          | 1           | 0            | 0               |
| rs2265613              | rs164133   | OTHERSIGNAL       | 3       | NOS1AP       | -           | 0.87                           | 0 | 0                                                          | 2           | 0            | 0               |
| rs238773               | rs164133   | OTHERSIGNAL       | 3       | NOS1AP       | 0.025484    | 0.89                           | 0 | 0                                                          | 1           | 0            | 0               |
| rs2632549              | rs164133   | OTHERSIGNAL       | 3       | NOS1AP       | 1.2462E-10  | 0.81                           | 0 | 0                                                          | 1           | 0            | 0               |
| rs3122549              | rs164133   | OTHERSIGNAL       | 3       | NOS1AP       | -           | 0.85                           | 0 | 0                                                          | 0           | 0            | 0               |
| rs347272               | rs347272   | OTHERSIGNAL       | 3       | NOS1AP       | 1.29E-37    | 1.00                           | 0 | 0                                                          | 4           | 0            | 0               |
| rs347273               | rs347272   | OTHERSIGNAL       | 3       | NOS1AP       | 1.87E-38    | 1.00                           | 0 | 0                                                          | 9           | 0            | 0               |
| rs348628               | rs164133   | OTHERSIGNAL       | 3       | NOS1AP       | 0.0050804   | 1.00                           | 0 | 0                                                          | 1           | 0            | 0               |
| rs348629               | rs164133   | OTHERSIGNAL       | 3       | NOS1AP       | -           | 1.00                           | 0 | 0                                                          | 1           | 0            | 0               |
| rs351452               | rs164133   | OTHERSIGNAL       | 3       | NOS1AP       | 0.0050804   | 0.99                           | 0 | 0                                                          | 10          | 0            | 0               |
| rs351453               | rs164133   | OTHERSIGNAL       | 3       | NOS1AP       | 4.2471E-11  | 0.99                           | 0 | 0                                                          | 14          | 0            | 0               |
| rs351454               | rs164133   | OTHERSIGNAL       | 3       | NOS1AP       | 0.0050804   | 0.99                           | 0 | 0                                                          | 7           | 0            | 0               |
| rs351455               | rs164133   | OTHERSIGNAL       | 3       | NOS1AP       | -           | 0.87                           | 0 | 0                                                          | 8           | 0            | 0               |
| rs351456               | rs164133   | OTHERSIGNAL       | 3       | NOS1AP       | 3.8437E-11  | 0.99                           | 0 | 0                                                          | 6           | 0            | 0               |
| rs351457               | rs164133   | OTHERSIGNAL       | 3       | NOS1AP       | -           | 0.87                           | 0 | 0                                                          | 6           | 0            | 0               |
| rs391411               | rs164133   | OTHERSIGNAL       | 3       | NOS1AP       | -           | 0.93                           | 0 | 0                                                          | 1           | 0            | 0               |
| rs3934467              | rs3934467  | OTHERSIGNAL       | 3       | NOS1AP       | 2.76E-129   | 1.00                           | 1 | 0                                                          | 55          | 1            | 1               |
| rs4098275              | rs4657172  | OTHERSIGNAL       | 3       | NOS1AP       | 1.2197E-07  | 1.00                           | 0 | 0                                                          | 16          | 0            | 0               |
| rs4098276              | rs4657172  | OTHERSIGNAL       | 3       | NOS1AP       | 0.31777     | 1.00                           | 0 | 0                                                          | 16          | 0            | 0               |
| rs4098277              | rs4657172  | OTHERSIGNAL       | 3       | NOS1AP       | 1.087E-07   | 1.00                           | 0 | 0                                                          | 12          | 0            | 0               |
| rs415883               | rs164133   | OTHERSIGNAL       | 3       | NOS1AP       | 0.0050804   | 0.97                           | 0 | 0                                                          | 1           | 0            | 0               |
| rs4233386              | rs4657172  | OTHERSIGNAL       | 3       | NOS1AP       | 0.60027     | 1.00                           | 1 | 0                                                          | 16          | 0            | 1               |
| rs4306106              | rs3934467  | OTHERSIGNAL       | 3       | NOS1AP       | 5.97E-127   | 0.99                           | 0 | 0                                                          | 0           | 0            | 0               |
| rs4391647              | rs3934467  | OTHERSIGNAL       | 3       | NOS1AP       | 1.79E-126   | 1.00                           | 0 | 0                                                          | 5           | 0            | 0               |
| rs4480335              | rs3934467  | OTHERSIGNAL       | 3       | NOS1AP       | 9.88E-128   | 0.99                           | 0 | 0                                                          | 4           | 0            | 0               |
| rs4488007              | rs4657172  | OTHERSIGNAL       | 3       | NOS1AP       | 1.6622E-07  | 1.00                           | 0 | 0                                                          | 1           | 0            | 0               |
| rs4656345              | rs4656345  | OTHERSIGNAL       | 3       | NOS1AP       | 1.03E-19    | 1.00                           | 0 | 0                                                          | 15          | 0            | 1               |
| rs4656359              | rs4657172  | OTHERSIGNAL       | 3       | NOS1AP       | -           | 1.00                           | 1 | 0                                                          | 16          | 0            | 1               |
| rs4657168              | rs4657172  | OTHERSIGNAL       | 3       | NOS1AP       | 0.000026062 | 1.00                           | 0 | 0                                                          | 14          | 0            | 0               |
| rs4657170              | rs4657172  | OTHERSIGNAL       | 3       | NOS1AP       | 0.056769    | 1.00                           | 0 | 0                                                          | 11          | 0            | 0               |
| rs4657172              | rs4657172  | OTHERSIGNAL       | 3       | NOS1AP       | 1.2664E-08  | 1.00                           | 0 | 0                                                          | 4           | 0            | 0               |
| rs4657173              | rs3934467  | OTHERSIGNAL       | 3       | NOS1AP       | 5.2106E-09  | 1.00                           | 1 | 0                                                          | 41          | 0            | 0               |

|             |            |             |          |            |      |   |    |   |   |   |
|-------------|------------|-------------|----------|------------|------|---|----|---|---|---|
| rs4657175   | rs3934467  | OTHERSIGNAL | 3 NOS1AP | 8.68E-125  | 0.97 | 0 | 4  | 0 | 0 | 0 |
| rs55749148  | rs4657172  | OTHERSIGNAL | 3 NOS1AP | -          | 1.00 | 0 | 16 | 0 | 0 | 0 |
| rs55937722  | rs4657172  | OTHERSIGNAL | 3 NOS1AP | -          | 1.00 | 0 | 0  | 0 | 0 | 0 |
| rs56074757  | rs4657172  | OTHERSIGNAL | 3 NOS1AP | -          | 1.00 | 0 | 0  | 0 | 0 | 0 |
| rs57765910  | rs4657172  | OTHERSIGNAL | 3 NOS1AP | -          | 1.00 | 0 | 10 | 0 | 0 | 0 |
| rs60129000  | rs12143842 | INDEX       | 3 NOS1AP | -          | 0.96 | 0 | 1  | 0 | 0 | 0 |
| rs60709352  | rs347272   | OTHERSIGNAL | 3 NOS1AP | -          | 0.80 | 0 | 18 | 0 | 0 | 0 |
| rs6664632   | rs4657172  | OTHERSIGNAL | 3 NOS1AP | 4.5356E-08 | 1.00 | 0 | 8  | 0 | 0 | 0 |
| rs6664702   | rs3934467  | OTHERSIGNAL | 3 NOS1AP | 9.11E-109  | 0.83 | 0 | 15 | 1 | 0 | 0 |
| rs6667431   | rs3934467  | OTHERSIGNAL | 3 NOS1AP | 6.53E-123  | 0.98 | 1 | 32 | 1 | 0 | 1 |
| rs6668457   | rs4657172  | OTHERSIGNAL | 3 NOS1AP | 7.711E-08  | 1.00 | 0 | 13 | 0 | 0 | 0 |
| rs6669543   | rs6669543  | OTHERSIGNAL | 3 NOS1AP | 1.65E-39   | 1.00 | 1 | 12 | 1 | 1 | 1 |
| rs6674320   | rs6669543  | OTHERSIGNAL | 3 NOS1AP | 4.98E-37   | 0.84 | 1 | 8  | 0 | 1 | 1 |
| rs6676638   | rs4657172  | OTHERSIGNAL | 3 NOS1AP | 4.9262E-08 | 1.00 | 0 | 13 | 0 | 0 | 0 |
| rs6676737   | rs4657172  | OTHERSIGNAL | 3 NOS1AP | 8.1945E-08 | 1.00 | 0 | 13 | 0 | 0 | 0 |
| rs6678925   | rs4657172  | OTHERSIGNAL | 3 NOS1AP | 2.7067E-08 | 1.00 | 1 | 11 | 0 | 0 | 0 |
| rs6692381   | rs3934467  | OTHERSIGNAL | 3 NOS1AP | 8.85E-127  | 0.99 | 1 | 32 | 1 | 0 | 1 |
| rs6696759   | rs3934467  | OTHERSIGNAL | 3 NOS1AP | -          | 0.99 | 0 | 4  | 0 | 0 | 0 |
| rs73017353  | rs4657172  | OTHERSIGNAL | 3 NOS1AP | -          | 1.00 | 0 | 0  | 0 | 0 | 0 |
| rs73017359  | rs4657172  | OTHERSIGNAL | 3 NOS1AP | -          | 1.00 | 1 | 13 | 0 | 1 | 1 |
| rs7415748   | rs4657172  | OTHERSIGNAL | 3 NOS1AP | 1.9995E-07 | 1.00 | 0 | 5  | 0 | 0 | 0 |
| rs7522678   | rs3934467  | OTHERSIGNAL | 3 NOS1AP | 6.59E-115  | 0.88 | 1 | 27 | 0 | 0 | 0 |
| rs7536043   | rs3934467  | OTHERSIGNAL | 3 NOS1AP | -          | 0.83 | 0 | 15 | 0 | 0 | 0 |
| rs7541606   | rs3934467  | OTHERSIGNAL | 3 NOS1AP | 0.00026807 | 0.88 | 0 | 11 | 1 | 0 | 0 |
| rs7545047   | rs7545047  | OTHERSIGNAL | 3 NOS1AP | 8.8924E-14 | 1.00 | 0 | 10 | 0 | 0 | 0 |
| rs10800403  | rs12079745 | OTHERSIGNAL | 4 ATP1B1 | -          | 0.98 | 0 | 0  | 0 | 0 | 0 |
| rs1080267   | rs12079745 | OTHERSIGNAL | 4 ATP1B1 | 1.1004E-09 | 0.89 | 0 | 3  | 0 | 0 | 0 |
| rs10919062  | rs10919070 | INDEX       | 4 ATP1B1 | 7.59E-26   | 0.96 | 1 | 31 | 1 | 0 | 0 |
| rs10919070  | rs10919070 | INDEX       | 4 ATP1B1 | 1.11E-31   | 1.00 | 0 | 7  | 0 | 0 | 0 |
| rs10919071  | rs10919070 | INDEX       | 4 ATP1B1 | 1.40E-31   | 0.99 | 0 | 0  | 0 | 0 | 0 |
| rs10919073  | rs12079745 | OTHERSIGNAL | 4 ATP1B1 | 8.3032E-11 | 1.00 | 0 | 7  | 0 | 0 | 0 |
| rs10919074  | rs10919070 | INDEX       | 4 ATP1B1 | 2.01E-27   | 0.93 | 0 | 3  | 0 | 0 | 0 |
| rs1138486   | rs12079745 | OTHERSIGNAL | 4 ATP1B1 | 1.5271E-10 | 0.98 | 0 | 8  | 0 | 0 | 0 |
| rs11801853  | rs12079745 | OTHERSIGNAL | 4 ATP1B1 | 8.5022E-10 | 0.96 | 0 | 0  | 0 | 0 | 0 |
| rs11809180  | rs12079745 | OTHERSIGNAL | 4 ATP1B1 | 6.5504E-08 | 0.98 | 0 | 0  | 0 | 0 | 0 |
| rs12035622  | rs10919070 | INDEX       | 4 ATP1B1 | 3.58E-27   | 0.93 | 0 | 7  | 0 | 0 | 0 |
| rs12061601  | rs12061601 | OTHERSIGNAL | 4 ATP1B1 | 3.10E-21   | 1.00 | 0 | 20 | 1 | 0 | 0 |
| rs12066676  | rs12079745 | OTHERSIGNAL | 4 ATP1B1 | -          | 0.92 | 0 | 0  | 1 | 0 | 0 |
| rs12070626  | rs12079745 | OTHERSIGNAL | 4 ATP1B1 | 0.38041    | 0.92 | 0 | 2  | 0 | 0 | 0 |
| rs12076510  | rs12079745 | OTHERSIGNAL | 4 ATP1B1 | -          | 0.96 | 0 | 1  | 0 | 0 | 0 |
| rs12079745  | rs12079745 | OTHERSIGNAL | 4 ATP1B1 | 1.2195E-10 | 1.00 | 0 | 0  | 0 | 0 | 0 |
| rs12079856  | rs12061601 | OTHERSIGNAL | 4 ATP1B1 | 0.0404     | 0.96 | 0 | 25 | 1 | 0 | 0 |
| rs12084964  | rs12079745 | OTHERSIGNAL | 4 ATP1B1 | 4.5529E-09 | 1.00 | 0 | 9  | 0 | 0 | 0 |
| rs12086104  | rs12079745 | OTHERSIGNAL | 4 ATP1B1 | 0.4264     | 1.00 | 0 | 12 | 0 | 0 | 0 |
| rs12095171  | rs12079745 | OTHERSIGNAL | 4 ATP1B1 | 1.2795E-09 | 1.00 | 0 | 10 | 0 | 0 | 0 |
| rs12406341  | rs10919070 | INDEX       | 4 ATP1B1 | -          | 0.95 | 0 | 0  | 0 | 0 | 0 |
| rs12564558  | rs12079745 | OTHERSIGNAL | 4 ATP1B1 | 2.2966E-10 | 0.96 | 0 | 0  | 0 | 0 | 0 |
| rs12568473  | rs10919070 | INDEX       | 4 ATP1B1 | -          | 0.98 | 0 | 2  | 1 | 0 | 0 |
| rs12751593  | rs12061601 | OTHERSIGNAL | 4 ATP1B1 | -          | 0.90 | 0 | 0  | 0 | 0 | 0 |
| rs1320966   | rs12079745 | OTHERSIGNAL | 4 ATP1B1 | 0.0012717  | 1.00 | 0 | 14 | 0 | 0 | 0 |
| rs1320976   | rs12061601 | OTHERSIGNAL | 4 ATP1B1 | 0.0025452  | 0.96 | 0 | 20 | 1 | 0 | 0 |
| rs1320977   | rs12061601 | OTHERSIGNAL | 4 ATP1B1 | 0.040886   | 0.96 | 0 | 20 | 1 | 0 | 0 |
| rs143475554 | rs545833   | OTHERSIGNAL | 4 ATP1B1 | -          | 0.99 | 0 | 0  | 0 | 0 | 0 |
| rs146291410 | rs12079745 | OTHERSIGNAL | 4 ATP1B1 | -          | 1.00 | 0 | 0  | 0 | 0 | 0 |
| rs146350925 | rs12079745 | OTHERSIGNAL | 4 ATP1B1 | -          | 0.92 | 0 | 0  | 1 | 0 | 0 |
| rs1534984   | rs12061601 | OTHERSIGNAL | 4 ATP1B1 | 0.040886   | 0.91 | 0 | 20 | 0 | 0 | 0 |
| rs17345156  | rs10919070 | INDEX       | 4 ATP1B1 | 2.92E-30   | 0.88 | 0 | 0  | 0 | 0 | 0 |
| rs1892092   | rs12061601 | OTHERSIGNAL | 4 ATP1B1 | -          | 0.93 | 0 | 20 | 1 | 0 | 0 |
| rs1892093   | rs12061601 | OTHERSIGNAL | 4 ATP1B1 | 0.040886   | 0.92 | 0 | 20 | 1 | 0 | 0 |
| rs1983546   | rs1983546  | OTHERSIGNAL | 4 ATP1B1 | 9.74E-16   | 1.00 | 0 | 0  | 0 | 0 | 0 |
| rs199593766 | rs10919070 | INDEX       | 4 ATP1B1 | -          | 0.89 | 0 | 0  | 0 | 0 | 0 |
| rs2000321   | rs10919070 | INDEX       | 4 ATP1B1 | 1.17E-26   | 0.96 | 0 | 2  | 0 | 0 | 0 |
| rs2143290   | rs10919070 | INDEX       | 4 ATP1B1 | 9.36E-31   | 0.93 | 1 | 29 | 1 | 0 | 0 |
| rs28362572  | rs12061601 | OTHERSIGNAL | 4 ATP1B1 | 0.043497   | 0.93 | 0 | 0  | 0 | 0 | 0 |
| rs34605921  | rs12079745 | OTHERSIGNAL | 4 ATP1B1 | -          | 1.00 | 0 | 0  | 0 | 0 | 0 |
| rs34645703  | rs12079745 | OTHERSIGNAL | 4 ATP1B1 | -          | 0.98 | 0 | 0  | 0 | 0 | 0 |
| rs34847919  | rs12079745 | OTHERSIGNAL | 4 ATP1B1 | -          | 1.00 | 0 | 5  | 0 | 0 | 0 |
| rs35037551  | rs12079745 | OTHERSIGNAL | 4 ATP1B1 | -          | 1.00 | 0 | 5  | 0 | 0 | 0 |
| rs35742469  | rs12079745 | OTHERSIGNAL | 4 ATP1B1 | -          | 0.94 | 0 | 0  | 0 | 0 | 0 |
| rs3766045   | rs12079745 | OTHERSIGNAL | 4 ATP1B1 | -          | 0.92 | 0 | 7  | 0 | 0 | 0 |
| rs3766063   | rs12079745 | OTHERSIGNAL | 4 ATP1B1 | 0.48633    | 1.00 | 0 | 5  | 0 | 0 | 0 |
| rs3834008   | rs10919070 | INDEX       | 4 ATP1B1 | -          | 0.93 | 0 | 4  | 0 | 1 | 0 |
| rs3835362   | rs545833   | OTHERSIGNAL | 4 ATP1B1 | -          | 0.88 | 0 | 1  | 1 | 0 | 0 |
| rs4656647   | rs12061601 | OTHERSIGNAL | 4 ATP1B1 | 0.044959   | 0.92 | 0 | 7  | 0 | 0 | 0 |
| rs512129    | rs545833   | OTHERSIGNAL | 4 ATP1B1 | 0.14647    | 1.00 | 0 | 12 | 1 | 0 | 0 |
| rs528953    | rs545833   | OTHERSIGNAL | 4 ATP1B1 | 2.35E-16   | 1.00 | 0 | 0  | 1 | 0 | 0 |
| rs531706    | rs545833   | OTHERSIGNAL | 4 ATP1B1 | 0.055766   | 1.00 | 0 | 1  | 1 | 0 | 0 |
| rs533619    | rs545833   | OTHERSIGNAL | 4 ATP1B1 | -          | 1.00 | 0 | 0  | 0 | 0 | 0 |
| rs545833    | rs545833   | OTHERSIGNAL | 4 ATP1B1 | 3.89E-17   | 1.00 | 0 | 1  | 1 | 0 | 0 |
| rs553721    | rs545833   | OTHERSIGNAL | 4 ATP1B1 | -          | 0.90 | 0 | 4  | 1 | 0 | 0 |
| rs573418    | rs545833   | OTHERSIGNAL | 4 ATP1B1 | 0.055766   | 1.00 | 0 | 0  | 1 | 0 | 0 |
| rs590875    | rs545833   | OTHERSIGNAL | 4 ATP1B1 | -          | 1.00 | 0 | 0  | 0 | 0 | 0 |
| rs59732929  | rs12061601 | OTHERSIGNAL | 4 ATP1B1 | -          | 0.96 | 1 | 39 | 1 | 0 | 0 |
| rs607484    | rs545833   | OTHERSIGNAL | 4 ATP1B1 | 0.32961    | 1.00 | 0 | 15 | 1 | 1 | 0 |
| rs635954    | rs545833   | OTHERSIGNAL | 4 ATP1B1 | 0.060358   | 1.00 | 0 | 9  | 1 | 0 | 0 |
| rs6672876   | rs12061601 | OTHERSIGNAL | 4 ATP1B1 | -          | 0.89 | 0 | 0  | 0 | 0 | 0 |
| rs678629    | rs545833   | OTHERSIGNAL | 4 ATP1B1 | -          | 0.98 | 0 | 0  | 1 | 0 | 0 |
| rs681316    | rs545833   | OTHERSIGNAL | 4 ATP1B1 | 0.048572   | 0.90 | 0 | 4  | 1 | 0 | 0 |
| rs72637225  | rs12079745 | OTHERSIGNAL | 4 ATP1B1 | -          | 0.96 | 0 | 6  | 0 | 0 | 0 |
| rs72706963  | rs10919070 | INDEX       | 4 ATP1B1 | -          | 0.93 | 0 | 9  | 0 | 1 | 0 |
| rs72706975  | rs10919070 | INDEX       | 4 ATP1B1 | -          | 0.89 | 0 | 11 | 0 | 0 | 0 |
| rs75505858  | rs12061601 | OTHERSIGNAL | 4 ATP1B1 | -          | 0.94 | 0 | 37 | 1 | 0 | 1 |

|             |            |             |               |             |      |   |    |   |   |   |
|-------------|------------|-------------|---------------|-------------|------|---|----|---|---|---|
| rs77448520  | rs12061601 | OTHERSIGNAL | 4 ATP1B1      | -           | 0.98 | 0 | 6  | 1 | 0 | 0 |
| rs79011457  | rs12061601 | OTHERSIGNAL | 4 ATP1B1      | -           | 0.91 | 1 | 34 | 1 | 0 | 1 |
| rs79284357  | rs12061601 | OTHERSIGNAL | 4 ATP1B1      | -           | 0.92 | 0 | 0  | 0 | 0 | 0 |
| rs10490255  | rs12997023 | INDEX       | 5 SLC8A1      | 5.0365E-14  | 1.00 | 0 | 7  | 0 | 0 | 0 |
| rs1072384   | rs12997023 | INDEX       | 5 SLC8A1      | -           | 0.86 | 0 | 0  | 0 | 0 | 0 |
| rs11685090  | rs6544311  | OTHERSIGNAL | 5 SLC8A1      | 3.5933E-09  | 0.82 | 0 | 0  | 1 | 0 | 0 |
| rs12991033  | rs12997023 | INDEX       | 5 SLC8A1      | 0.20211     | 1.00 | 0 | 11 | 0 | 0 | 0 |
| rs12997023  | rs12997023 | INDEX       | 5 SLC8A1      | 4.6674E-14  | 1.00 | 0 | 0  | 0 | 0 | 0 |
| rs12997042  | rs12997023 | INDEX       | 5 SLC8A1      | 0.071102    | 1.00 | 0 | 0  | 0 | 0 | 0 |
| rs13002045  | rs12997023 | INDEX       | 5 SLC8A1      | 0.071102    | 1.00 | 0 | 0  | 0 | 0 | 0 |
| rs13010657  | rs12997023 | INDEX       | 5 SLC8A1      | 9.36E-14    | 1.00 | 0 | 0  | 0 | 0 | 0 |
| rs13010889  | rs12997023 | INDEX       | 5 SLC8A1      | 2.4185E-11  | 1.00 | 1 | 1  | 1 | 0 | 0 |
| rs13012895  | rs12997023 | INDEX       | 5 SLC8A1      | 7.2045E-14  | 1.00 | 0 | 0  | 0 | 0 | 0 |
| rs13017279  | rs12997023 | INDEX       | 5 SLC8A1      | 1.5351E-13  | 1.00 | 0 | 0  | 0 | 0 | 0 |
| rs13017846  | rs12997023 | INDEX       | 5 SLC8A1      | 2.6225E-13  | 1.00 | 0 | 0  | 0 | 0 | 0 |
| rs13019501  | rs12997023 | INDEX       | 5 SLC8A1      | 0.071102    | 1.00 | 0 | 0  | 0 | 0 | 0 |
| rs13020186  | rs12997023 | INDEX       | 5 SLC8A1      | 7.686E-14   | 0.93 | 0 | 0  | 0 | 0 | 0 |
| rs13020198  | rs12997023 | INDEX       | 5 SLC8A1      | -           | 1.00 | 0 | 0  | 0 | 0 | 0 |
| rs13026826  | rs12997023 | INDEX       | 5 SLC8A1      | 8.6022E-14  | 1.00 | 0 | 0  | 0 | 0 | 0 |
| rs13028820  | rs12997023 | INDEX       | 5 SLC8A1      | 8.2391E-14  | 1.00 | 0 | 0  | 0 | 0 | 0 |
| rs13029763  | rs12997023 | INDEX       | 5 SLC8A1      | 0.075556    | 0.88 | 0 | 3  | 0 | 0 | 0 |
| rs142291896 | rs12997023 | INDEX       | 5 SLC8A1      | -           | 0.85 | 1 | 0  | 1 | 0 | 0 |
| rs17026106  | rs12997023 | INDEX       | 5 SLC8A1      | 8.0795E-14  | 1.00 | 0 | 12 | 0 | 0 | 0 |
| rs17026114  | rs12997023 | INDEX       | 5 SLC8A1      | 6.50E-14    | 1.00 | 0 | 0  | 0 | 0 | 0 |
| rs17026131  | rs12997023 | INDEX       | 5 SLC8A1      | 9.5471E-14  | 1.00 | 0 | 0  | 0 | 0 | 0 |
| rs17026148  | rs12997023 | INDEX       | 5 SLC8A1      | 0.059683    | 1.00 | 0 | 0  | 0 | 0 | 0 |
| rs17026152  | rs12997023 | INDEX       | 5 SLC8A1      | 1.4877E-13  | 1.00 | 0 | 0  | 0 | 0 | 0 |
| rs17026155  | rs12997023 | INDEX       | 5 SLC8A1      | 3.166E-13   | 1.00 | 0 | 3  | 1 | 0 | 0 |
| rs17026156  | rs12997023 | INDEX       | 5 SLC8A1      | 1.4339E-13  | 1.00 | 0 | 2  | 1 | 0 | 0 |
| rs2006286   | rs6544311  | OTHERSIGNAL | 5 SLC8A1      | -           | 0.83 | 0 | 0  | 0 | 0 | 0 |
| rs2006287   | rs6544311  | OTHERSIGNAL | 5 SLC8A1      | -           | 0.83 | 0 | 0  | 0 | 0 | 0 |
| rs201856023 | rs6544311  | OTHERSIGNAL | 5 SLC8A1      | -           | 0.80 | 0 | 0  | 1 | 0 | 0 |
| rs202207867 | rs12997023 | INDEX       | 5 SLC8A1      | -           | 0.92 | 1 | 0  | 1 | 0 | 0 |
| rs2098477   | rs12997023 | INDEX       | 5 SLC8A1      | 8.2542E-14  | 1.00 | 0 | 0  | 0 | 0 | 0 |
| rs2098478   | rs12997023 | INDEX       | 5 SLC8A1      | 7.1521E-14  | 1.00 | 0 | 0  | 0 | 0 | 0 |
| rs2110922   | rs6544311  | OTHERSIGNAL | 5 SLC8A1      | -           | 0.83 | 0 | 1  | 1 | 0 | 0 |
| rs2193563   | rs12997023 | INDEX       | 5 SLC8A1      | 0.149       | 1.00 | 0 | 1  | 1 | 0 | 0 |
| rs2193565   | rs12997023 | INDEX       | 5 SLC8A1      | 5.0165E-13  | 1.00 | 0 | 0  | 0 | 0 | 0 |
| rs34090630  | rs12997023 | INDEX       | 5 SLC8A1      | -           | 1.00 | 0 | 0  | 0 | 0 | 0 |
| rs34549837  | rs12997023 | INDEX       | 5 SLC8A1      | -           | 1.00 | 0 | 11 | 0 | 0 | 0 |
| rs34766086  | rs12997023 | INDEX       | 5 SLC8A1      | -           | 1.00 | 0 | 12 | 0 | 0 | 0 |
| rs35014850  | rs12997023 | INDEX       | 5 SLC8A1      | -           | 1.00 | 0 | 0  | 0 | 0 | 0 |
| rs35455710  | rs12997023 | INDEX       | 5 SLC8A1      | -           | 1.00 | 0 | 0  | 0 | 0 | 0 |
| rs35537386  | rs12997023 | INDEX       | 5 SLC8A1      | -           | 1.00 | 0 | 2  | 1 | 0 | 0 |
| rs36011854  | rs12997023 | INDEX       | 5 SLC8A1      | -           | 1.00 | 0 | 11 | 0 | 0 | 0 |
| rs3796079   | rs12997023 | INDEX       | 5 SLC8A1      | 2.5307E-13  | 1.00 | 0 | 5  | 1 | 0 | 0 |
| rs3796080   | rs12997023 | INDEX       | 5 SLC8A1      | 2.8878E-13  | 1.00 | 0 | 3  | 1 | 0 | 0 |
| rs4952469   | rs6544311  | OTHERSIGNAL | 5 SLC8A1      | -           | 0.87 | 1 | 7  | 0 | 1 | 1 |
| rs4952632   | rs12997023 | INDEX       | 5 SLC8A1      | 8.4268E-14  | 1.00 | 0 | 0  | 0 | 0 | 0 |
| rs60079242  | rs12997023 | INDEX       | 5 SLC8A1      | -           | 1.00 | 0 | 3  | 0 | 0 | 0 |
| rs6544311   | rs6544311  | OTHERSIGNAL | 5 SLC8A1      | 1.785E-10   | 1.00 | 0 | 10 | 1 | 0 | 0 |
| rs67014132  | rs12997023 | INDEX       | 5 SLC8A1      | -           | 1.00 | 0 | 4  | 1 | 0 | 0 |
| rs70957147  | rs6544311  | OTHERSIGNAL | 5 SLC8A1      | -           | 0.86 | 0 | 0  | 1 | 0 | 0 |
| rs70957184  | rs12997023 | INDEX       | 5 SLC8A1      | -           | 1.00 | 0 | 1  | 0 | 0 | 0 |
| rs71426871  | rs12997023 | INDEX       | 5 SLC8A1      | -           | 1.00 | 0 | 0  | 0 | 0 | 0 |
| rs71441106  | rs12997023 | INDEX       | 5 SLC8A1      | -           | 1.00 | 0 | 2  | 0 | 0 | 0 |
| rs71441107  | rs12997023 | INDEX       | 5 SLC8A1      | -           | 1.00 | 0 | 2  | 0 | 0 | 0 |
| rs72935262  | rs6544311  | OTHERSIGNAL | 5 SLC8A1      | -           | 0.84 | 0 | 0  | 0 | 0 | 0 |
| rs7573537   | rs6544311  | OTHERSIGNAL | 5 SLC8A1      | 6.0902E-10  | 0.82 | 0 | 0  | 1 | 0 | 0 |
| rs765554    | rs6544311  | OTHERSIGNAL | 5 SLC8A1      | 7.4257E-10  | 0.92 | 0 | 14 | 0 | 0 | 1 |
| rs765555    | rs6544311  | OTHERSIGNAL | 5 SLC8A1      | 2.682E-09   | 0.95 | 0 | 9  | 0 | 0 | 1 |
| rs10084350  | rs938291   | INDEX       | 6 SP3         | 0.00002014  | 0.82 | 0 | 10 | 0 | 0 | 0 |
| rs11300872  | rs938291   | INDEX       | 6 SP3         | -           | 0.95 | 0 | 0  | 0 | 0 | 0 |
| rs13010038  | rs938291   | INDEX       | 6 SP3         | -           | 0.95 | 0 | 9  | 0 | 0 | 0 |
| rs35886484  | rs938291   | INDEX       | 6 SP3         | -           | 0.95 | 0 | 0  | 0 | 0 | 0 |
| rs6707596   | rs938291   | INDEX       | 6 SP3         | -           | 0.94 | 0 | 0  | 0 | 0 | 0 |
| rs938291    | rs938291   | INDEX       | 6 SP3         | 5.8749E-10  | 1.00 | 0 | 0  | 0 | 0 | 0 |
| rs12464151  | rs7561149  | INDEX       | 7 TTN-CCDC141 | -           | 0.97 | 0 | 1  | 0 | 0 | 0 |
| rs12469367  | rs7561149  | INDEX       | 7 TTN-CCDC141 | 2.008E-08   | 0.97 | 0 | 1  | 0 | 0 | 0 |
| rs12471428  | rs7561149  | INDEX       | 7 TTN-CCDC141 | 5.2887E-07  | 0.94 | 0 | 0  | 0 | 0 | 0 |
| rs12992014  | rs7561149  | INDEX       | 7 TTN-CCDC141 | -           | 0.97 | 0 | 1  | 0 | 0 | 0 |
| rs13006510  | rs7561149  | INDEX       | 7 TTN-CCDC141 | 1.0548E-06  | 0.93 | 1 | 0  | 0 | 0 | 0 |
| rs3769858   | rs7561149  | INDEX       | 7 TTN-CCDC141 | 0.000007715 | 0.80 | 0 | 1  | 0 | 0 | 0 |
| rs6729746   | rs7561149  | INDEX       | 7 TTN-CCDC141 | -           | 0.80 | 0 | 1  | 0 | 0 | 0 |
| rs7561149   | rs7561149  | INDEX       | 7 TTN-CCDC141 | 7.0669E-09  | 1.00 | 0 | 4  | 0 | 0 | 0 |
| rs7591782   | rs7561149  | INDEX       | 7 TTN-CCDC141 | 5.2774E-08  | 0.94 | 1 | 14 | 0 | 0 | 1 |
| rs7600330   | rs7561149  | INDEX       | 7 TTN-CCDC141 | 1.8134E-08  | 0.96 | 0 | 4  | 0 | 0 | 0 |
| rs10931897  | rs295140   | INDEX       | 8 SPATS2L     | 8.6632E-09  | 0.99 | 0 | 2  | 0 | 0 | 0 |
| rs10931898  | rs295140   | INDEX       | 8 SPATS2L     | -           | 0.84 | 0 | 0  | 0 | 0 | 0 |
| rs10931899  | rs295140   | INDEX       | 8 SPATS2L     | 1.0517E-08  | 0.98 | 1 | 49 | 1 | 1 | 0 |
| rs10931900  | rs295140   | INDEX       | 8 SPATS2L     | -           | 0.97 | 1 | 50 | 1 | 1 | 1 |
| rs11696001  | rs295140   | INDEX       | 8 SPATS2L     | 8.1976E-09  | 0.99 | 0 | 2  | 0 | 0 | 0 |
| rs11888462  | rs295140   | INDEX       | 8 SPATS2L     | 4.9492E-09  | 1.00 | 0 | 1  | 0 | 0 | 0 |
| rs12469091  | rs295140   | INDEX       | 8 SPATS2L     | 1.4743E-06  | 0.82 | 0 | 10 | 0 | 0 | 0 |
| rs12474914  | rs295140   | INDEX       | 8 SPATS2L     | -           | 0.82 | 0 | 0  | 0 | 0 | 0 |
| rs12614621  | rs295140   | INDEX       | 8 SPATS2L     | -           | 0.99 | 0 | 0  | 0 | 0 | 0 |
| rs12618057  | rs295140   | INDEX       | 8 SPATS2L     | -           | 0.90 | 0 | 0  | 0 | 0 | 0 |
| rs13005573  | rs295140   | INDEX       | 8 SPATS2L     | -           | 0.99 | 0 | 7  | 0 | 0 | 0 |
| rs13007517  | rs295140   | INDEX       | 8 SPATS2L     | -           | 0.82 | 0 | 5  | 0 | 0 | 0 |
| rs13026151  | rs295140   | INDEX       | 8 SPATS2L     | -           | 0.99 | 0 | 7  | 0 | 0 | 0 |
| rs13028959  | rs295140   | INDEX       | 8 SPATS2L     | 9.6282E-09  | 0.96 | 0 | 40 | 1 | 1 | 1 |
| rs1367856   | rs295140   | INDEX       | 8 SPATS2L     | 7.4342E-09  | 1.00 | 0 | 1  | 0 | 0 | 0 |

|             |            |             |                |   |             |      |    |    |   |   |
|-------------|------------|-------------|----------------|---|-------------|------|----|----|---|---|
| rs1367857   | rs295140   | INDEX       | 8 SPATS2L      | - | 1.00        | 0    | 1  | 0  | 0 | 0 |
| rs141893693 | rs295140   | INDEX       | 8 SPATS2L      | - | 0.98        | 1    | 29 | 0  | 0 | 0 |
| rs1431766   | rs295140   | INDEX       | 8 SPATS2L      | - | 7.588E-09   | 0.98 | 0  | 0  | 0 | 0 |
| rs200117095 | rs295140   | INDEX       | 8 SPATS2L      | - | 0.95        | 0    | 18 | 1  | 0 | 0 |
| rs200281491 | rs295140   | INDEX       | 8 SPATS2L      | - | 0.82        | 0    | 3  | 0  | 0 | 0 |
| rs295140    | rs295140   | INDEX       | 8 SPATS2L      | - | 4.4143E-13  | 1.00 | 0  | 1  | 0 | 0 |
| rs35518740  | rs295140   | INDEX       | 8 SPATS2L      | - | 0.96        | 0    | 3  | 0  | 0 | 0 |
| rs3739121   | rs295140   | INDEX       | 8 SPATS2L      | - | 3.2653E-07  | 0.99 | 0  | 0  | 0 | 0 |
| rs3769476   | rs295140   | INDEX       | 8 SPATS2L      | - | 1.1872E-08  | 0.98 | 1  | 50 | 0 | 0 |
| rs3820888   | rs295140   | INDEX       | 8 SPATS2L      | - | 0.84        | 1    | 33 | 0  | 1 | 1 |
| rs4233994   | rs295140   | INDEX       | 8 SPATS2L      | - | 1.3267E-06  | 0.81 | 0  | 3  | 0 | 0 |
| rs4516413   | rs295140   | INDEX       | 8 SPATS2L      | - | 0.99        | 0    | 7  | 0  | 0 | 0 |
| rs4516415   | rs295140   | INDEX       | 8 SPATS2L      | - | 0.81        | 0    | 5  | 0  | 0 | 0 |
| rs4673904   | rs295140   | INDEX       | 8 SPATS2L      | - | 0.83        | 0    | 6  | 0  | 0 | 0 |
| rs4673906   | rs295140   | INDEX       | 8 SPATS2L      | - | 0.99        | 0    | 7  | 0  | 0 | 0 |
| rs4673912   | rs295140   | INDEX       | 8 SPATS2L      | - | 3.4627E-06  | 0.81 | 0  | 4  | 0 | 0 |
| rs55677233  | rs295140   | INDEX       | 8 SPATS2L      | - | 0.99        | 0    | 4  | 0  | 0 | 0 |
| rs56326533  | rs295140   | INDEX       | 8 SPATS2L      | - | 0.84        | 0    | 4  | 0  | 0 | 0 |
| rs67190025  | rs295140   | INDEX       | 8 SPATS2L      | - | 0.94        | 0    | 1  | 0  | 0 | 0 |
| rs71022314  | rs295140   | INDEX       | 8 SPATS2L      | - | 0.96        | 0    | 1  | 0  | 0 | 0 |
| rs74853338  | rs295140   | INDEX       | 8 SPATS2L      | - | 0.83        | 0    | 0  | 0  | 0 | 0 |
| rs7559005   | rs295140   | INDEX       | 8 SPATS2L      | - | 0.99        | 0    | 1  | 0  | 0 | 0 |
| rs7578220   | rs295140   | INDEX       | 8 SPATS2L      | - | 9.8942E-09  | 0.97 | 1  | 54 | 1 | 1 |
| rs7580924   | rs295140   | INDEX       | 8 SPATS2L      | - | 0.98        | 0    | 2  | 0  | 0 | 0 |
| rs7584810   | rs295140   | INDEX       | 8 SPATS2L      | - | 0.99        | 0    | 33 | 0  | 0 | 0 |
| rs7599609   | rs295140   | INDEX       | 8 SPATS2L      | - | 0.98        | 1    | 18 | 1  | 1 | 0 |
| rs7605146   | rs295140   | INDEX       | 8 SPATS2L      | - | 1.7264E-06  | 0.84 | 1  | 57 | 1 | 1 |
| rs10428132  | rs6801957  | OTHERSIGNAL | 9 SCNSA-SCN10A | - | 0.00092196  | 0.98 | 0  | 0  | 0 | 0 |
| rs11441682  | rs6599234  | OTHERSIGNAL | 9 SCNSA-SCN10A | - | 0.91        | 0    | 1  | 0  | 0 | 0 |
| rs11708996  | rs11708996 | OTHERSIGNAL | 9 SCNSA-SCN10A | - | 2.27E-11    | 1.00 | 0  | 0  | 0 | 0 |
| rs11710077  | rs11710077 | OTHERSIGNAL | 9 SCNSA-SCN10A | - | 1.4245E-13  | 1.00 | 1  | 11 | 1 | 0 |
| rs11711941  | rs6801957  | OTHERSIGNAL | 9 SCNSA-SCN10A | - | 0.86        | 0    | 0  | 0  | 0 | 0 |
| rs11720166  | rs6793245  | INDEX       | 9 SCNSA-SCN10A | - | 1.00        | 0    | 0  | 0  | 0 | 0 |
| rs11924846  | rs6801957  | OTHERSIGNAL | 9 SCNSA-SCN10A | - | 4.82E-10    | 0.88 | 0  | 0  | 0 | 0 |
| rs12053903  | rs6793245  | INDEX       | 9 SCNSA-SCN10A | - | 2.94E-26    | 0.93 | 0  | 0  | 0 | 0 |
| rs141384382 | rs11708996 | OTHERSIGNAL | 9 SCNSA-SCN10A | - | 1.00        | 0    | 0  | 0  | 0 | 0 |
| rs35243266  | rs6793245  | INDEX       | 9 SCNSA-SCN10A | - | 0.98        | 0    | 0  | 0  | 0 | 0 |
| rs4076737   | rs6801957  | OTHERSIGNAL | 9 SCNSA-SCN10A | - | 6.7978E-10  | 0.88 | 1  | 16 | 1 | 0 |
| rs41312411  | rs11708996 | OTHERSIGNAL | 9 SCNSA-SCN10A | - | 0.94        | 1    | 24 | 1  | 1 | 1 |
| rs4131768   | rs6599234  | OTHERSIGNAL | 9 SCNSA-SCN10A | - | 0.85        | 0    | 2  | 0  | 0 | 0 |
| rs6599233   | rs6599234  | OTHERSIGNAL | 9 SCNSA-SCN10A | - | 0.97        | 0    | 0  | 0  | 0 | 0 |
| rs6599234   | rs6599234  | OTHERSIGNAL | 9 SCNSA-SCN10A | - | 2.223E-11   | 1.00 | 0  | 0  | 0 | 0 |
| rs6599250   | rs6801957  | OTHERSIGNAL | 9 SCNSA-SCN10A | - | 7.2186E-11  | 0.97 | 0  | 0  | 0 | 0 |
| rs6599251   | rs6801957  | OTHERSIGNAL | 9 SCNSA-SCN10A | - | 3.1797E-09  | 0.80 | 0  | 0  | 0 | 0 |
| rs6599254   | rs6801957  | OTHERSIGNAL | 9 SCNSA-SCN10A | - | 2.9793E-10  | 0.94 | 0  | 0  | 0 | 0 |
| rs6599255   | rs6801957  | OTHERSIGNAL | 9 SCNSA-SCN10A | - | 1.0277E-08  | 0.94 | 0  | 0  | 0 | 0 |
| rs6782237   | rs6599234  | OTHERSIGNAL | 9 SCNSA-SCN10A | - | 0.87        | 0    | 0  | 0  | 0 | 0 |
| rs6783110   | rs6801957  | OTHERSIGNAL | 9 SCNSA-SCN10A | - | 0.05614     | 0.85 | 0  | 3  | 1 | 0 |
| rs6790396   | rs6801957  | OTHERSIGNAL | 9 SCNSA-SCN10A | - | 2.7068E-09  | 0.98 | 0  | 10 | 0 | 0 |
| rs6793245   | rs6793245  | INDEX       | 9 SCNSA-SCN10A | - | 4.43E-27    | 1.00 | 0  | 0  | 0 | 0 |
| rs6795970   | rs6801957  | OTHERSIGNAL | 9 SCNSA-SCN10A | - | 1.891E-10   | 0.98 | 1  | 16 | 1 | 0 |
| rs6799868   | rs6793245  | INDEX       | 9 SCNSA-SCN10A | - | 7.63E-27    | 0.99 | 0  | 0  | 0 | 0 |
| rs6800541   | rs6801957  | OTHERSIGNAL | 9 SCNSA-SCN10A | - | 8.1443E-11  | 0.98 | 0  | 1  | 0 | 0 |
| rs6801957   | rs6801957  | OTHERSIGNAL | 9 SCNSA-SCN10A | - | 1.1261E-10  | 1.00 | 0  | 20 | 1 | 0 |
| rs6804918   | rs6793245  | INDEX       | 9 SCNSA-SCN10A | - | 0.99        | 0    | 0  | 0  | 0 | 0 |
| rs73070977  | rs11708996 | OTHERSIGNAL | 9 SCNSA-SCN10A | - | 1.00        | 0    | 1  | 0  | 0 | 0 |
| rs73070981  | rs11708996 | OTHERSIGNAL | 9 SCNSA-SCN10A | - | 1.00        | 0    | 2  | 0  | 0 | 0 |
| rs7373779   | rs6793245  | INDEX       | 9 SCNSA-SCN10A | - | 0.94        | 0    | 0  | 0  | 0 | 0 |
| rs7428167   | rs6801957  | OTHERSIGNAL | 9 SCNSA-SCN10A | - | 0.82        | 0    | 0  | 0  | 0 | 0 |
| rs7430191   | rs11710077 | OTHERSIGNAL | 9 SCNSA-SCN10A | - | 0.92        | 0    | 0  | 0  | 0 | 0 |
| rs7430391   | rs6599234  | OTHERSIGNAL | 9 SCNSA-SCN10A | - | 0.96        | 0    | 1  | 0  | 0 | 0 |
| rs7433306   | rs6801957  | OTHERSIGNAL | 9 SCNSA-SCN10A | - | 8.1281E-11  | 0.98 | 0  | 0  | 0 | 0 |
| rs7433723   | rs6801957  | OTHERSIGNAL | 9 SCNSA-SCN10A | - | 0.19314     | 0.95 | 0  | 0  | 0 | 0 |
| rs7633988   | rs6599234  | OTHERSIGNAL | 9 SCNSA-SCN10A | - | 1.8901E-10  | 0.98 | 0  | 1  | 0 | 0 |
| rs7645178   | rs6793245  | INDEX       | 9 SCNSA-SCN10A | - | 0.99        | 0    | 0  | 0  | 0 | 0 |
| rs9311197   | rs6801957  | OTHERSIGNAL | 9 SCNSA-SCN10A | - | 0.81        | 0    | 0  | 0  | 0 | 0 |
| rs9809798   | rs6801957  | OTHERSIGNAL | 9 SCNSA-SCN10A | - | 0.82        | 0    | 1  | 0  | 0 | 0 |
| rs9820042   | rs6801957  | OTHERSIGNAL | 9 SCNSA-SCN10A | - | 0.98        | 0    | 0  | 0  | 0 | 0 |
| rs9844378   | rs6599234  | OTHERSIGNAL | 9 SCNSA-SCN10A | - | 0.88        | 0    | 5  | 1  | 0 | 0 |
| rs9844577   | rs6801957  | OTHERSIGNAL | 9 SCNSA-SCN10A | - | 0.24831     | 0.95 | 0  | 0  | 0 | 0 |
| rs9851710   | rs6599234  | OTHERSIGNAL | 9 SCNSA-SCN10A | - | 2.4116E-11  | 0.98 | 0  | 0  | 0 | 0 |
| rs9851724   | rs6599234  | OTHERSIGNAL | 9 SCNSA-SCN10A | - | 2.6998E-11  | 0.98 | 0  | 0  | 0 | 0 |
| rs1038394   | rs17784882 | INDEX       | 10 C3ORF75     | - | 0.00072559  | 0.84 | 1  | 6  | 1 | 0 |
| rs10865946  | rs17784882 | INDEX       | 10 C3ORF75     | - | 1.0502E-07  | 0.82 | 0  | 23 | 0 | 0 |
| rs11130128  | rs17784882 | INDEX       | 10 C3ORF75     | - | 4.88E-08    | 0.90 | 0  | 4  | 0 | 0 |
| rs11130129  | rs17784882 | INDEX       | 10 C3ORF75     | - | 1.4733E-07  | 0.90 | 0  | 0  | 0 | 0 |
| rs11130132  | rs17784882 | INDEX       | 10 C3ORF75     | - | 0.98        | 0    | 2  | 0  | 0 | 0 |
| rs11130133  | rs17784882 | INDEX       | 10 C3ORF75     | - | 0.98        | 0    | 0  | 0  | 0 | 0 |
| rs11130137  | rs17784882 | INDEX       | 10 C3ORF75     | - | 3.8995E-08  | 0.94 | 0  | 4  | 0 | 0 |
| rs111378194 | rs17784882 | INDEX       | 10 C3ORF75     | - | 0.91        | 0    | 0  | 0  | 0 | 0 |
| rs11705957  | rs17784882 | INDEX       | 10 C3ORF75     | - | 3.5455E-08  | 0.82 | 0  | 2  | 0 | 0 |
| rs11707895  | rs17784882 | INDEX       | 10 C3ORF75     | - | 0.95        | 0    | 3  | 0  | 0 | 0 |
| rs11711265  | rs17784882 | INDEX       | 10 C3ORF75     | - | 0.0010994   | 0.98 | 0  | 0  | 0 | 0 |
| rs11711824  | rs17784882 | INDEX       | 10 C3ORF75     | - | 0.000000747 | 0.83 | 0  | 0  | 0 | 0 |
| rs11712445  | rs17784882 | INDEX       | 10 C3ORF75     | - | 2.3818E-07  | 0.82 | 0  | 6  | 0 | 0 |
| rs11713413  | rs17784882 | INDEX       | 10 C3ORF75     | - | 0.91        | 0    | 0  | 0  | 0 | 0 |
| rs11716661  | rs17784882 | INDEX       | 10 C3ORF75     | - | 0.84        | 0    | 2  | 0  | 0 | 0 |
| rs11716763  | rs17784882 | INDEX       | 10 C3ORF75     | - | 4.5902E-08  | 0.93 | 1  | 45 | 0 | 1 |
| rs11719877  | rs17784882 | INDEX       | 10 C3ORF75     | - | 5.6765E-08  | 0.82 | 1  | 13 | 0 | 0 |
| rs11914795  | rs17784882 | INDEX       | 10 C3ORF75     | - | 0.85        | 0    | 6  | 0  | 0 | 0 |
| rs11914913  | rs17784882 | INDEX       | 10 C3ORF75     | - | 0.96        | 0    | 0  | 0  | 0 | 0 |
| rs11914932  | rs17784882 | INDEX       | 10 C3ORF75     | - | 0.98        | 0    | 3  | 0  | 0 | 0 |

|             |            |       |             |            |      |   |    |   |   |   |
|-------------|------------|-------|-------------|------------|------|---|----|---|---|---|
| rs11925823  | rs17784882 | INDEX | 10 C3ORF75  | -          | 0.82 | 0 | 1  | 0 | 0 | 0 |
| rs12486969  | rs17784882 | INDEX | 10 C3ORF75  | -          | 0.82 | 0 | 1  | 0 | 0 | 0 |
| rs12489046  | rs17784882 | INDEX | 10 C3ORF75  | 3.6105E-08 | 0.92 | 0 | 0  | 0 | 0 | 0 |
| rs12490058  | rs17784882 | INDEX | 10 C3ORF75  | 0.00071005 | 0.98 | 0 | 0  | 0 | 0 | 0 |
| rs12492433  | rs17784882 | INDEX | 10 C3ORF75  | -          | 0.92 | 1 | 43 | 0 | 0 | 0 |
| rs12497225  | rs17784882 | INDEX | 10 C3ORF75  | -          | 0.83 | 0 | 2  | 0 | 0 | 0 |
| rs12630641  | rs17784882 | INDEX | 10 C3ORF75  | -          | 0.98 | 0 | 1  | 0 | 0 | 0 |
| rs12632132  | rs17784882 | INDEX | 10 C3ORF75  | -          | 0.83 | 0 | 5  | 0 | 0 | 0 |
| rs12636851  | rs17784882 | INDEX | 10 C3ORF75  | 5.22E-08   | 0.84 | 1 | 21 | 1 | 1 | 0 |
| rs13059519  | rs17784882 | INDEX | 10 C3ORF75  | 4.0735E-08 | 0.99 | 0 | 0  | 0 | 0 | 0 |
| rs13064843  | rs17784882 | INDEX | 10 C3ORF75  | -          | 0.82 | 0 | 0  | 0 | 0 | 0 |
| rs13075233  | rs17784882 | INDEX | 10 C3ORF75  | 1.4894E-07 | 0.82 | 0 | 41 | 0 | 0 | 0 |
| rs13079098  | rs17784882 | INDEX | 10 C3ORF75  | -          | 0.81 | 0 | 0  | 0 | 0 | 0 |
| rs145456175 | rs17784882 | INDEX | 10 C3ORF75  | -          | 0.90 | 0 | 0  | 0 | 0 | 0 |
| rs1531875   | rs17784882 | INDEX | 10 C3ORF75  | 0.0012038  | 0.83 | 0 | 1  | 0 | 0 | 0 |
| rs17784882  | rs17784882 | INDEX | 10 C3ORF75  | 3.2863E-08 | 1.00 | 0 | 0  | 0 | 0 | 0 |
| rs1872164   | rs17784882 | INDEX | 10 C3ORF75  | 5.7238E-08 | 0.83 | 0 | 1  | 0 | 0 | 0 |
| rs2062278   | rs17784882 | INDEX | 10 C3ORF75  | 1.1509E-07 | 0.83 | 0 | 0  | 0 | 0 | 0 |
| rs2101247   | rs17784882 | INDEX | 10 C3ORF75  | 8.989E-08  | 0.90 | 1 | 10 | 0 | 0 | 0 |
| rs2291298   | rs17784882 | INDEX | 10 C3ORF75  | 1.4494E-07 | 0.98 | 0 | 0  | 0 | 0 | 0 |
| rs34634681  | rs17784882 | INDEX | 10 C3ORF75  | -          | 0.94 | 0 | 5  | 0 | 0 | 0 |
| rs3736177   | rs17784882 | INDEX | 10 C3ORF75  | 1.2652E-07 | 0.83 | 0 | 0  | 0 | 0 | 0 |
| rs3816779   | rs17784882 | INDEX | 10 C3ORF75  | 4.0812E-08 | 0.98 | 0 | 0  | 0 | 0 | 0 |
| rs4599332   | rs17784882 | INDEX | 10 C3ORF75  | -          | 0.94 | 0 | 2  | 0 | 0 | 0 |
| rs4858805   | rs17784882 | INDEX | 10 C3ORF75  | -          | 0.81 | 0 | 0  | 0 | 0 | 0 |
| rs4858811   | rs17784882 | INDEX | 10 C3ORF75  | 5.7529E-08 | 0.87 | 0 | 0  | 0 | 0 | 0 |
| rs4858848   | rs17784882 | INDEX | 10 C3ORF75  | -          | 0.80 | 0 | 1  | 0 | 0 | 0 |
| rs4858856   | rs17784882 | INDEX | 10 C3ORF75  | 4.2651E-08 | 0.96 | 0 | 2  | 0 | 0 | 0 |
| rs4858868   | rs17784882 | INDEX | 10 C3ORF75  | 5.2098E-08 | 0.83 | 0 | 0  | 0 | 0 | 0 |
| rs4858894   | rs17784882 | INDEX | 10 C3ORF75  | 1.5885E-07 | 0.88 | 1 | 57 | 1 | 1 | 1 |
| rs56032309  | rs17784882 | INDEX | 10 C3ORF75  | -          | 0.83 | 0 | 0  | 0 | 0 | 0 |
| rs56351005  | rs17784882 | INDEX | 10 C3ORF75  | -          | 0.81 | 0 | 0  | 0 | 0 | 0 |
| rs57346147  | rs17784882 | INDEX | 10 C3ORF75  | -          | 0.83 | 0 | 3  | 0 | 0 | 0 |
| rs59586735  | rs17784882 | INDEX | 10 C3ORF75  | -          | 0.93 | 1 | 45 | 0 | 1 | 1 |
| rs60369822  | rs17784882 | INDEX | 10 C3ORF75  | -          | 0.88 | 0 | 0  | 0 | 0 | 0 |
| rs62248599  | rs17784882 | INDEX | 10 C3ORF75  | -          | 0.91 | 0 | 0  | 0 | 0 | 0 |
| rs62248603  | rs17784882 | INDEX | 10 C3ORF75  | -          | 0.87 | 0 | 0  | 0 | 0 | 0 |
| rs62248605  | rs17784882 | INDEX | 10 C3ORF75  | -          | 0.94 | 0 | 0  | 0 | 0 | 0 |
| rs62260710  | rs17784882 | INDEX | 10 C3ORF75  | -          | 0.97 | 0 | 6  | 0 | 0 | 0 |
| rs62260711  | rs17784882 | INDEX | 10 C3ORF75  | -          | 0.97 | 0 | 6  | 0 | 0 | 0 |
| rs62260741  | rs17784882 | INDEX | 10 C3ORF75  | -          | 0.91 | 0 | 0  | 0 | 0 | 0 |
| rs6765990   | rs17784882 | INDEX | 10 C3ORF75  | -          | 0.99 | 0 | 0  | 0 | 0 | 0 |
| rs6787422   | rs17784882 | INDEX | 10 C3ORF75  | -          | 0.82 | 0 | 11 | 0 | 0 | 0 |
| rs6790763   | rs17784882 | INDEX | 10 C3ORF75  | -          | 0.93 | 0 | 0  | 0 | 0 | 0 |
| rs6792461   | rs17784882 | INDEX | 10 C3ORF75  | 5.6506E-08 | 0.83 | 0 | 4  | 1 | 0 | 0 |
| rs6792488   | rs17784882 | INDEX | 10 C3ORF75  | -          | 0.89 | 0 | 8  | 0 | 0 | 1 |
| rs6800271   | rs17784882 | INDEX | 10 C3ORF75  | 4.348E-08  | 0.83 | 0 | 1  | 0 | 0 | 0 |
| rs73081205  | rs17784882 | INDEX | 10 C3ORF75  | -          | 0.91 | 0 | 2  | 0 | 0 | 0 |
| rs7628631   | rs17784882 | INDEX | 10 C3ORF75  | 3.7084E-08 | 0.98 | 0 | 0  | 0 | 0 | 0 |
| rs7649234   | rs17784882 | INDEX | 10 C3ORF75  | -          | 0.90 | 1 | 10 | 0 | 0 | 0 |
| rs7651194   | rs17784882 | INDEX | 10 C3ORF75  | -          | 0.99 | 0 | 0  | 0 | 0 | 0 |
| rs7651762   | rs17784882 | INDEX | 10 C3ORF75  | 7.8971E-08 | 0.83 | 0 | 2  | 0 | 0 | 0 |
| rs79438810  | rs17784882 | INDEX | 10 C3ORF75  | -          | 0.84 | 0 | 2  | 0 | 0 | 0 |
| rs878659    | rs17784882 | INDEX | 10 C3ORF75  | 3.9069E-08 | 0.90 | 0 | 10 | 0 | 1 | 0 |
| rs922957    | rs17784882 | INDEX | 10 C3ORF75  | 5.9797E-08 | 0.83 | 0 | 0  | 0 | 0 | 0 |
| rs9683033   | rs17784882 | INDEX | 10 C3ORF75  | 0.00054819 | 0.90 | 0 | 0  | 0 | 0 | 0 |
| rs9683177   | rs17784882 | INDEX | 10 C3ORF75  | -          | 0.90 | 0 | 1  | 0 | 0 | 0 |
| rs1947376   | rs2363719  | INDEX | 11 SLC4A4   | 1.1942E-09 | 1.00 | 0 | 2  | 0 | 0 | 0 |
| rs1947378   | rs2363719  | INDEX | 11 SLC4A4   | 3.2792E-09 | 1.00 | 0 | 2  | 0 | 0 | 0 |
| rs2363719   | rs2363719  | INDEX | 11 SLC4A4   | 7.8435E-10 | 1.00 | 0 | 2  | 0 | 0 | 0 |
| rs55760668  | rs2363719  | INDEX | 11 SLC4A4   | -          | 1.00 | 0 | 2  | 0 | 0 | 0 |
| rs10023582  | rs3857067  | INDEX | 12 SMARCAD1 | 4.3094E-06 | 0.94 | 0 | 1  | 0 | 0 | 0 |
| rs10034161  | rs3857067  | INDEX | 12 SMARCAD1 | -          | 0.95 | 0 | 0  | 0 | 0 | 0 |
| rs115969971 | rs3857067  | INDEX | 12 SMARCAD1 | -          | 1.00 | 0 | 0  | 0 | 0 | 0 |
| rs12502725  | rs3857067  | INDEX | 12 SMARCAD1 | 2.0672E-07 | 0.85 | 0 | 0  | 0 | 0 | 0 |
| rs12505694  | rs3857067  | INDEX | 12 SMARCAD1 | -          | 0.94 | 0 | 0  | 0 | 0 | 0 |
| rs1355240   | rs3857067  | INDEX | 12 SMARCAD1 | -          | 1.00 | 0 | 0  | 0 | 0 | 0 |
| rs138036517 | rs3857067  | INDEX | 12 SMARCAD1 | -          | 0.94 | 0 | 0  | 0 | 0 | 0 |
| rs1397025   | rs3857067  | INDEX | 12 SMARCAD1 | -          | 1.00 | 0 | 0  | 0 | 0 | 0 |
| rs1397026   | rs3857067  | INDEX | 12 SMARCAD1 | -          | 1.00 | 0 | 0  | 0 | 0 | 0 |
| rs1397027   | rs3857067  | INDEX | 12 SMARCAD1 | -          | 0.96 | 0 | 0  | 0 | 0 | 0 |
| rs140445440 | rs3857067  | INDEX | 12 SMARCAD1 | -          | 0.87 | 0 | 0  | 0 | 0 | 0 |
| rs1472984   | rs3857067  | INDEX | 12 SMARCAD1 | 4.0906E-06 | 0.95 | 0 | 1  | 0 | 0 | 0 |
| rs1509940   | rs3857067  | INDEX | 12 SMARCAD1 | -          | 1.00 | 0 | 0  | 0 | 0 | 0 |
| rs1509941   | rs3857067  | INDEX | 12 SMARCAD1 | -          | 0.96 | 0 | 0  | 0 | 0 | 0 |
| rs1509942   | rs3857067  | INDEX | 12 SMARCAD1 | -          | 1.00 | 0 | 0  | 0 | 0 | 0 |
| rs1509943   | rs3857067  | INDEX | 12 SMARCAD1 | -          | 1.00 | 0 | 0  | 0 | 0 | 0 |
| rs1509945   | rs3857067  | INDEX | 12 SMARCAD1 | 1.2919E-06 | 0.82 | 0 | 0  | 0 | 0 | 0 |
| rs1585652   | rs3857067  | INDEX | 12 SMARCAD1 | -          | 1.00 | 0 | 0  | 0 | 0 | 0 |
| rs1588381   | rs3857067  | INDEX | 12 SMARCAD1 | -          | 1.00 | 0 | 0  | 0 | 0 | 0 |
| rs1588382   | rs3857067  | INDEX | 12 SMARCAD1 | 0.63271    | 0.98 | 0 | 0  | 0 | 0 | 0 |
| rs1588384   | rs3857067  | INDEX | 12 SMARCAD1 | -          | 0.85 | 0 | 0  | 0 | 0 | 0 |
| rs1588385   | rs3857067  | INDEX | 12 SMARCAD1 | -          | 1.00 | 0 | 0  | 0 | 0 | 0 |
| rs1841925   | rs3857067  | INDEX | 12 SMARCAD1 | 8.7672E-07 | 0.93 | 0 | 0  | 0 | 0 | 0 |
| rs1848793   | rs3857067  | INDEX | 12 SMARCAD1 | -          | 0.89 | 0 | 0  | 0 | 0 | 0 |
| rs1848794   | rs3857067  | INDEX | 12 SMARCAD1 | -          | 0.86 | 0 | 0  | 0 | 0 | 0 |
| rs1904094   | rs3857067  | INDEX | 12 SMARCAD1 | -          | 0.98 | 0 | 0  | 0 | 0 | 0 |
| rs1904095   | rs3857067  | INDEX | 12 SMARCAD1 | -          | 0.95 | 0 | 0  | 0 | 0 | 0 |
| rs1904096   | rs3857067  | INDEX | 12 SMARCAD1 | 1.0807E-07 | 0.95 | 0 | 0  | 0 | 0 | 0 |
| rs199617535 | rs3857067  | INDEX | 12 SMARCAD1 | -          | 0.88 | 0 | 0  | 0 | 0 | 0 |
| rs201233944 | rs3857067  | INDEX | 12 SMARCAD1 | -          | 0.91 | 0 | 0  | 0 | 0 | 0 |
| rs2089698   | rs3857067  | INDEX | 12 SMARCAD1 | -          | 1.00 | 0 | 0  | 0 | 0 | 0 |

|             |            |             |                |             |      |   |    |   |   |   |
|-------------|------------|-------------|----------------|-------------|------|---|----|---|---|---|
| rs2100915   | rs3857067  | INDEX       | 12 SMARCAD1    | -           | 0.95 | 0 | 0  | 0 | 0 | 0 |
| rs2199603   | rs3857067  | INDEX       | 12 SMARCAD1    | -           | 1.00 | 0 | 0  | 0 | 0 | 0 |
| rs2219755   | rs3857067  | INDEX       | 12 SMARCAD1    | -           | 1.00 | 0 | 0  | 0 | 0 | 0 |
| rs2865330   | rs3857067  | INDEX       | 12 SMARCAD1    | 5.702E-08   | 0.89 | 0 | 0  | 0 | 0 | 0 |
| rs2865332   | rs3857067  | INDEX       | 12 SMARCAD1    | 1.9022E-07  | 0.96 | 0 | 0  | 0 | 0 | 0 |
| rs2865335   | rs3857067  | INDEX       | 12 SMARCAD1    | -           | 0.90 | 0 | 0  | 0 | 0 | 0 |
| rs2865336   | rs3857067  | INDEX       | 12 SMARCAD1    | 1.1888E-06  | 0.96 | 0 | 0  | 0 | 0 | 0 |
| rs28840089  | rs3857067  | INDEX       | 12 SMARCAD1    | -           | 0.89 | 0 | 0  | 0 | 0 | 0 |
| rs28876091  | rs3857067  | INDEX       | 12 SMARCAD1    | -           | 0.89 | 0 | 0  | 0 | 0 | 0 |
| rs34368301  | rs3857067  | INDEX       | 12 SMARCAD1    | -           | 1.00 | 0 | 0  | 0 | 0 | 0 |
| rs3846291   | rs3857067  | INDEX       | 12 SMARCAD1    | 2.948E-07   | 1.00 | 0 | 0  | 0 | 0 | 0 |
| rs3846292   | rs3857067  | INDEX       | 12 SMARCAD1    | 3.1473E-07  | 1.00 | 0 | 0  | 0 | 0 | 0 |
| rs3857067   | rs3857067  | INDEX       | 12 SMARCAD1    | 1.1546E-09  | 1.00 | 0 | 0  | 0 | 0 | 0 |
| rs3857068   | rs3857067  | INDEX       | 12 SMARCAD1    | 4.647E-08   | 0.99 | 0 | 0  | 0 | 0 | 0 |
| rs3975200   | rs3857067  | INDEX       | 12 SMARCAD1    | -           | 0.96 | 0 | 0  | 0 | 0 | 0 |
| rs4324525   | rs3857067  | INDEX       | 12 SMARCAD1    | -           | 0.99 | 0 | 0  | 0 | 0 | 0 |
| rs4693364   | rs3857067  | INDEX       | 12 SMARCAD1    | -           | 0.96 | 0 | 0  | 0 | 0 | 0 |
| rs4693368   | rs3857067  | INDEX       | 12 SMARCAD1    | 1.3379E-06  | 0.92 | 0 | 1  | 0 | 0 | 0 |
| rs5019896   | rs3857067  | INDEX       | 12 SMARCAD1    | 9.1882E-07  | 0.94 | 0 | 1  | 0 | 0 | 0 |
| rs58319462  | rs3857067  | INDEX       | 12 SMARCAD1    | -           | 0.83 | 0 | 0  | 0 | 0 | 0 |
| rs6532454   | rs3857067  | INDEX       | 12 SMARCAD1    | -           | 0.96 | 0 | 0  | 0 | 0 | 0 |
| rs6532455   | rs3857067  | INDEX       | 12 SMARCAD1    | -           | 0.80 | 0 | 0  | 0 | 0 | 0 |
| rs6532456   | rs3857067  | INDEX       | 12 SMARCAD1    | -           | 0.81 | 0 | 0  | 0 | 0 | 0 |
| rs6532462   | rs3857067  | INDEX       | 12 SMARCAD1    | -           | 1.00 | 0 | 0  | 0 | 0 | 0 |
| rs6532463   | rs3857067  | INDEX       | 12 SMARCAD1    | 3.6585E-07  | 1.00 | 0 | 0  | 0 | 0 | 0 |
| rs6815207   | rs3857067  | INDEX       | 12 SMARCAD1    | 1.8976E-06  | 0.86 | 0 | 0  | 0 | 0 | 0 |
| rs6817701   | rs3857067  | INDEX       | 12 SMARCAD1    | -           | 0.81 | 0 | 0  | 0 | 0 | 0 |
| rs6837655   | rs3857067  | INDEX       | 12 SMARCAD1    | 0.000028991 | 0.87 | 0 | 0  | 0 | 0 | 0 |
| rs6840942   | rs3857067  | INDEX       | 12 SMARCAD1    | -           | 0.85 | 0 | 0  | 0 | 0 | 0 |
| rs7668980   | rs3857067  | INDEX       | 12 SMARCAD1    | 1.5346E-06  | 0.95 | 0 | 1  | 0 | 0 | 0 |
| rs7682116   | rs3857067  | INDEX       | 12 SMARCAD1    | -           | 0.89 | 0 | 0  | 0 | 0 | 0 |
| rs7685048   | rs3857067  | INDEX       | 12 SMARCAD1    | 3.4272E-07  | 1.00 | 0 | 0  | 0 | 0 | 0 |
| rs7685601   | rs3857067  | INDEX       | 12 SMARCAD1    | -           | 1.00 | 0 | 0  | 0 | 0 | 0 |
| rs7694631   | rs3857067  | INDEX       | 12 SMARCAD1    | -           | 1.00 | 0 | 0  | 0 | 0 | 0 |
| rs7694820   | rs3857067  | INDEX       | 12 SMARCAD1    | -           | 1.00 | 0 | 0  | 0 | 0 | 0 |
| rs899132    | rs3857067  | INDEX       | 12 SMARCAD1    | 9.6627E-07  | 0.94 | 0 | 0  | 0 | 0 | 0 |
| rs899133    | rs3857067  | INDEX       | 12 SMARCAD1    | -           | 1.00 | 0 | 0  | 0 | 0 | 0 |
| rs899134    | rs3857067  | INDEX       | 12 SMARCAD1    | -           | 1.00 | 0 | 0  | 0 | 0 | 0 |
| rs899135    | rs3857067  | INDEX       | 12 SMARCAD1    | 1.3789E-07  | 0.95 | 0 | 0  | 0 | 0 | 0 |
| rs9307135   | rs3857067  | INDEX       | 12 SMARCAD1    | -           | 0.95 | 0 | 0  | 0 | 0 | 0 |
| rs964843    | rs3857067  | INDEX       | 12 SMARCAD1    | 7.9975E-07  | 0.96 | 0 | 0  | 0 | 0 | 0 |
| rs965807    | rs3857067  | INDEX       | 12 SMARCAD1    | 1.2223E-06  | 0.92 | 0 | 0  | 0 | 0 | 0 |
| rs10040989  | rs10040989 | INDEX       | 13 GFRA3       | 5.4089E-11  | 1.00 | 0 | 3  | 0 | 0 | 0 |
| rs17171780  | rs10040989 | INDEX       | 13 GFRA3       | 4.3871E-09  | 0.90 | 0 | 0  | 0 | 0 | 0 |
| rs185184885 | rs10040989 | INDEX       | 13 GFRA3       | -           | 0.90 | 0 | 0  | 0 | 0 | 0 |
| rs2231472   | rs10040989 | INDEX       | 13 GFRA3       | 0.11392     | 0.90 | 0 | 0  | 0 | 0 | 0 |
| rs1042391   | rs7765828  | INDEX       | 14 GMPR        | 3.9133E-10  | 0.99 | 0 | 4  | 0 | 0 | 0 |
| rs11400155  | rs7765828  | INDEX       | 14 GMPR        | -           | 0.90 | 0 | 2  | 0 | 0 | 0 |
| rs148303943 | rs7765828  | INDEX       | 14 GMPR        | -           | 0.83 | 0 | 2  | 0 | 0 | 0 |
| rs200027952 | rs7765828  | INDEX       | 14 GMPR        | -           | 0.80 | 0 | 2  | 0 | 0 | 0 |
| rs2327958   | rs7765828  | INDEX       | 14 GMPR        | -           | 0.99 | 0 | 1  | 0 | 0 | 0 |
| rs4716053   | rs7765828  | INDEX       | 14 GMPR        | -           | 0.86 | 0 | 3  | 0 | 0 | 0 |
| rs4716054   | rs7765828  | INDEX       | 14 GMPR        | -           | 0.87 | 0 | 12 | 0 | 0 | 0 |
| rs4716056   | rs7765828  | INDEX       | 14 GMPR        | 3.9501E-10  | 0.88 | 1 | 47 | 0 | 1 | 0 |
| rs57120780  | rs7765828  | INDEX       | 14 GMPR        | -           | 0.81 | 0 | 2  | 0 | 0 | 0 |
| rs6459465   | rs7765828  | INDEX       | 14 GMPR        | 9.4581E-10  | 0.88 | 0 | 0  | 0 | 0 | 0 |
| rs6459466   | rs7765828  | INDEX       | 14 GMPR        | -           | 0.87 | 0 | 6  | 1 | 0 | 0 |
| rs6459467   | rs7765828  | INDEX       | 14 GMPR        | 6.1566E-10  | 0.97 | 0 | 1  | 0 | 0 | 0 |
| rs6933491   | rs7765828  | INDEX       | 14 GMPR        | 4.9072E-09  | 0.92 | 0 | 2  | 0 | 0 | 0 |
| rs7742883   | rs7765828  | INDEX       | 14 GMPR        | 4.6049E-09  | 0.89 | 1 | 19 | 1 | 1 | 1 |
| rs7752579   | rs7765828  | INDEX       | 14 GMPR        | -           | 0.87 | 0 | 6  | 1 | 0 | 0 |
| rs7763322   | rs7765828  | INDEX       | 14 GMPR        | 3.6914E-09  | 0.89 | 0 | 1  | 0 | 0 | 0 |
| rs7765828   | rs7765828  | INDEX       | 14 GMPR        | 3.211E-10   | 1.00 | 0 | 1  | 0 | 0 | 0 |
| rs9383142   | rs7765828  | INDEX       | 14 GMPR        | -           | 0.88 | 1 | 6  | 0 | 0 | 0 |
| rs9477074   | rs7765828  | INDEX       | 14 GMPR        | 5.7198E-09  | 0.90 | 0 | 1  | 0 | 0 | 0 |
| rs1034247   | rs457162   | OTHERSIGNAL | 15 SLC35F1-PLN | 4.18E-17    | 1.00 | 0 | 2  | 0 | 0 | 0 |
| rs10457327  | rs12210733 | OTHERSIGNAL | 15 SLC35F1-PLN | 2.68E-28    | 0.86 | 0 | 4  | 1 | 0 | 0 |
| rs10485390  | rs3902035  | OTHERSIGNAL | 15 SLC35F1-PLN | 1.46E-16    | 0.99 | 0 | 1  | 0 | 0 | 0 |
| rs11153730  | rs11153730 | INDEX       | 15 SLC35F1-PLN | 2.23E-67    | 1.00 | 0 | 0  | 0 | 0 | 0 |
| rs11153733  | rs12210733 | OTHERSIGNAL | 15 SLC35F1-PLN | 0.046791    | 0.80 | 0 | 1  | 0 | 0 | 0 |
| rs112615743 | rs457162   | OTHERSIGNAL | 15 SLC35F1-PLN | -           | 0.88 | 0 | 2  | 0 | 0 | 0 |
| rs11752626  | rs11153730 | INDEX       | 15 SLC35F1-PLN | 3.24E-61    | 0.81 | 0 | 0  | 0 | 0 | 0 |
| rs118167130 | rs3902035  | OTHERSIGNAL | 15 SLC35F1-PLN | -           | 1.00 | 0 | 2  | 0 | 0 | 0 |
| rs11965985  | rs11153730 | INDEX       | 15 SLC35F1-PLN | -           | 0.81 | 0 | 4  | 0 | 0 | 0 |
| rs11968293  | rs11153730 | INDEX       | 15 SLC35F1-PLN | 1.35E-55    | 0.82 | 0 | 3  | 1 | 0 | 0 |
| rs11970286  | rs11153730 | INDEX       | 15 SLC35F1-PLN | 9.55E-61    | 0.87 | 0 | 0  | 0 | 0 | 0 |
| rs12206973  | rs12210733 | OTHERSIGNAL | 15 SLC35F1-PLN | 1.75E-24    | 0.80 | 0 | 7  | 0 | 0 | 0 |
| rs12210733  | rs12210733 | OTHERSIGNAL | 15 SLC35F1-PLN | 1.13E-22    | 1.00 | 0 | 1  | 0 | 0 | 0 |
| rs12210810  | rs12210733 | OTHERSIGNAL | 15 SLC35F1-PLN | 2.67E-30    | 1.00 | 0 | 0  | 0 | 0 | 0 |
| rs12212795  | rs12210733 | OTHERSIGNAL | 15 SLC35F1-PLN | 4.43E-31    | 1.00 | 0 | 2  | 0 | 0 | 0 |
| rs12215355  | rs12210733 | OTHERSIGNAL | 15 SLC35F1-PLN | 9.13E-28    | 0.94 | 0 | 0  | 0 | 0 | 0 |
| rs12661563  | rs9489510  | OTHERSIGNAL | 15 SLC35F1-PLN | 3.3869E-10  | 0.80 | 0 | 12 | 1 | 0 | 0 |
| rs1334489   | rs11153730 | INDEX       | 15 SLC35F1-PLN | 1.40E-54    | 0.83 | 0 | 18 | 1 | 0 | 0 |
| rs141547617 | rs457162   | OTHERSIGNAL | 15 SLC35F1-PLN | -           | 0.96 | 0 | 0  | 0 | 0 | 0 |
| rs150144    | rs457162   | OTHERSIGNAL | 15 SLC35F1-PLN | 0.026818    | 0.98 | 0 | 1  | 0 | 0 | 0 |
| rs1572226   | rs11153730 | INDEX       | 15 SLC35F1-PLN | 2.58E-57    | 0.82 | 0 | 4  | 1 | 0 | 1 |
| rs17226667  | rs11153730 | INDEX       | 15 SLC35F1-PLN | 1.20E-60    | 0.83 | 0 | 3  | 0 | 0 | 0 |
| rs17227124  | rs11153730 | INDEX       | 15 SLC35F1-PLN | 3.42E-61    | 0.82 | 0 | 0  | 1 | 0 | 0 |
| rs17349133  | rs3902035  | OTHERSIGNAL | 15 SLC35F1-PLN | 2.18E-16    | 1.00 | 0 | 1  | 0 | 0 | 0 |
| rs17349301  | rs3902035  | OTHERSIGNAL | 15 SLC35F1-PLN | 7.53E-16    | 1.00 | 0 | 23 | 0 | 0 | 0 |
| rs17825393  | rs11153730 | INDEX       | 15 SLC35F1-PLN | 7.50E-61    | 0.81 | 0 | 0  | 0 | 0 | 0 |
| rs17825652  | rs11153730 | INDEX       | 15 SLC35F1-PLN | -           | 0.81 | 0 | 0  | 0 | 0 | 0 |

|            |            |             |                |             |      |   |    |   |   |   |
|------------|------------|-------------|----------------|-------------|------|---|----|---|---|---|
| rs1889465  | rs457162   | OTHERSIGNAL | 15 SLC35F1-PLN | 8.16E-19    | 1.00 | 0 | 2  | 0 | 0 | 0 |
| rs1889466  | rs457162   | OTHERSIGNAL | 15 SLC35F1-PLN | 4.57E-19    | 1.00 | 0 | 7  | 1 | 0 | 0 |
| rs1891713  | rs3902035  | OTHERSIGNAL | 15 SLC35F1-PLN | 9.60E-16    | 0.99 | 0 | 0  | 0 | 0 | 0 |
| rs1891714  | rs3902035  | OTHERSIGNAL | 15 SLC35F1-PLN | -           | 1.00 | 0 | 0  | 0 | 0 | 0 |
| rs1891715  | rs3902035  | OTHERSIGNAL | 15 SLC35F1-PLN | 1.08E-16    | 1.00 | 0 | 13 | 0 | 1 | 0 |
| rs1931976  | rs457162   | OTHERSIGNAL | 15 SLC35F1-PLN | 0.017235    | 1.00 | 0 | 0  | 0 | 0 | 0 |
| rs2050312  | rs457162   | OTHERSIGNAL | 15 SLC35F1-PLN | 4.09E-19    | 1.00 | 0 | 0  | 0 | 0 | 0 |
| rs2050313  | rs457162   | OTHERSIGNAL | 15 SLC35F1-PLN | 8.23E-19    | 0.98 | 0 | 0  | 0 | 0 | 0 |
| rs205917   | rs457162   | OTHERSIGNAL | 15 SLC35F1-PLN | -           | 1.00 | 0 | 3  | 0 | 0 | 0 |
| rs205918   | rs457162   | OTHERSIGNAL | 15 SLC35F1-PLN | -           | 1.00 | 0 | 4  | 0 | 0 | 0 |
| rs205919   | rs457162   | OTHERSIGNAL | 15 SLC35F1-PLN | -           | 1.00 | 0 | 3  | 0 | 0 | 0 |
| rs205920   | rs457162   | OTHERSIGNAL | 15 SLC35F1-PLN | -           | 1.00 | 0 | 1  | 0 | 0 | 0 |
| rs205921   | rs457162   | OTHERSIGNAL | 15 SLC35F1-PLN | -           | 0.83 | 0 | 2  | 0 | 0 | 0 |
| rs205922   | rs457162   | OTHERSIGNAL | 15 SLC35F1-PLN | -           | 0.93 | 0 | 2  | 0 | 0 | 0 |
| rs205923   | rs457162   | OTHERSIGNAL | 15 SLC35F1-PLN | 0.026818    | 0.98 | 0 | 1  | 0 | 0 | 0 |
| rs2065707  | rs457162   | OTHERSIGNAL | 15 SLC35F1-PLN | 8.94E-21    | 0.81 | 0 | 0  | 0 | 0 | 0 |
| rs2078383  | rs11153730 | INDEX       | 15 SLC35F1-PLN | -           | 0.81 | 0 | 0  | 0 | 0 | 0 |
| rs2093369  | rs11153730 | INDEX       | 15 SLC35F1-PLN | -           | 0.83 | 0 | 4  | 0 | 0 | 0 |
| rs2095406  | rs457162   | OTHERSIGNAL | 15 SLC35F1-PLN | 0.06312     | 1.00 | 0 | 0  | 0 | 0 | 0 |
| rs2105021  | rs457162   | OTHERSIGNAL | 15 SLC35F1-PLN | 0.017235    | 1.00 | 0 | 0  | 0 | 0 | 0 |
| rs2184365  | rs457162   | OTHERSIGNAL | 15 SLC35F1-PLN | 3.87E-19    | 1.00 | 0 | 0  | 0 | 0 | 0 |
| rs28436726 | rs12210733 | OTHERSIGNAL | 15 SLC35F1-PLN | 0.018876    | 0.87 | 0 | 1  | 0 | 0 | 0 |
| rs28710027 | rs3902035  | OTHERSIGNAL | 15 SLC35F1-PLN | -           | 0.91 | 0 | 2  | 0 | 0 | 0 |
| rs2883847  | rs457162   | OTHERSIGNAL | 15 SLC35F1-PLN | 0.019385    | 1.00 | 0 | 2  | 0 | 0 | 0 |
| rs2883848  | rs457162   | OTHERSIGNAL | 15 SLC35F1-PLN | 3.12E-19    | 1.00 | 0 | 0  | 0 | 0 | 0 |
| rs34367290 | rs457162   | OTHERSIGNAL | 15 SLC35F1-PLN | -           | 1.00 | 0 | 1  | 0 | 0 | 0 |
| rs34634569 | rs457162   | OTHERSIGNAL | 15 SLC35F1-PLN | -           | 1.00 | 0 | 0  | 0 | 0 | 0 |
| rs34889941 | rs457162   | OTHERSIGNAL | 15 SLC35F1-PLN | -           | 0.90 | 0 | 0  | 0 | 0 | 0 |
| rs36012145 | rs457162   | OTHERSIGNAL | 15 SLC35F1-PLN | -           | 0.88 | 0 | 0  | 0 | 0 | 0 |
| rs3902035  | rs3902035  | OTHERSIGNAL | 15 SLC35F1-PLN | 8.00E-16    | 1.00 | 0 | 18 | 0 | 0 | 0 |
| rs4245500  | rs457162   | OTHERSIGNAL | 15 SLC35F1-PLN | 6.20E-20    | 0.98 | 0 | 0  | 0 | 0 | 0 |
| rs455227   | rs457162   | OTHERSIGNAL | 15 SLC35F1-PLN | 0.019385    | 1.00 | 0 | 1  | 0 | 0 | 0 |
| rs455338   | rs457162   | OTHERSIGNAL | 15 SLC35F1-PLN | 0.019385    | 1.00 | 0 | 0  | 0 | 0 | 0 |
| rs457162   | rs457162   | OTHERSIGNAL | 15 SLC35F1-PLN | 2.49E-18    | 1.00 | 0 | 0  | 0 | 0 | 0 |
| rs457210   | rs457162   | OTHERSIGNAL | 15 SLC35F1-PLN | 0.019385    | 1.00 | 0 | 0  | 0 | 0 | 0 |
| rs458588   | rs457162   | OTHERSIGNAL | 15 SLC35F1-PLN | 1.72E-18    | 1.00 | 0 | 1  | 0 | 0 | 0 |
| rs460399   | rs457162   | OTHERSIGNAL | 15 SLC35F1-PLN | -           | 1.00 | 0 | 0  | 0 | 0 | 0 |
| rs465226   | rs457162   | OTHERSIGNAL | 15 SLC35F1-PLN | 4.64E-19    | 1.00 | 0 | 0  | 0 | 0 | 0 |
| rs4945614  | rs457162   | OTHERSIGNAL | 15 SLC35F1-PLN | 3.52E-19    | 1.00 | 0 | 3  | 1 | 0 | 0 |
| rs4945615  | rs457162   | OTHERSIGNAL | 15 SLC35F1-PLN | 0.000020996 | 1.00 | 0 | 0  | 0 | 0 | 0 |
| rs4945617  | rs457162   | OTHERSIGNAL | 15 SLC35F1-PLN | 2.93E-19    | 1.00 | 0 | 3  | 0 | 0 | 0 |
| rs4946328  | rs457162   | OTHERSIGNAL | 15 SLC35F1-PLN | 3.98E-19    | 1.00 | 0 | 1  | 1 | 0 | 0 |
| rs56061975 | rs3902035  | OTHERSIGNAL | 15 SLC35F1-PLN | -           | 0.98 | 0 | 0  | 0 | 0 | 0 |
| rs5879454  | rs457162   | OTHERSIGNAL | 15 SLC35F1-PLN | -           | 0.81 | 0 | 0  | 0 | 0 | 0 |
| rs59712944 | rs11153730 | INDEX       | 15 SLC35F1-PLN | -           | 0.81 | 0 | 14 | 0 | 0 | 0 |
| rs62422253 | rs3902035  | OTHERSIGNAL | 15 SLC35F1-PLN | -           | 1.00 | 0 | 4  | 0 | 0 | 0 |
| rs62422254 | rs3902035  | OTHERSIGNAL | 15 SLC35F1-PLN | -           | 0.99 | 0 | 11 | 0 | 0 | 0 |
| rs62422258 | rs3902035  | OTHERSIGNAL | 15 SLC35F1-PLN | -           | 1.00 | 0 | 10 | 0 | 0 | 0 |
| rs62422259 | rs3902035  | OTHERSIGNAL | 15 SLC35F1-PLN | -           | 1.00 | 0 | 8  | 0 | 0 | 0 |
| rs62423960 | rs3902035  | OTHERSIGNAL | 15 SLC35F1-PLN | -           | 1.00 | 0 | 9  | 0 | 0 | 0 |
| rs62423961 | rs3902035  | OTHERSIGNAL | 15 SLC35F1-PLN | -           | 1.00 | 0 | 2  | 0 | 0 | 0 |
| rs62423962 | rs3902035  | OTHERSIGNAL | 15 SLC35F1-PLN | -           | 0.99 | 0 | 2  | 0 | 0 | 0 |
| rs62423963 | rs3902035  | OTHERSIGNAL | 15 SLC35F1-PLN | -           | 0.99 | 0 | 3  | 0 | 0 | 0 |
| rs62423965 | rs3902035  | OTHERSIGNAL | 15 SLC35F1-PLN | -           | 1.00 | 0 | 2  | 0 | 0 | 0 |
| rs62423966 | rs3902035  | OTHERSIGNAL | 15 SLC35F1-PLN | -           | 1.00 | 0 | 1  | 0 | 0 | 0 |
| rs62423967 | rs3902035  | OTHERSIGNAL | 15 SLC35F1-PLN | -           | 1.00 | 0 | 2  | 0 | 0 | 0 |
| rs62423968 | rs3902035  | OTHERSIGNAL | 15 SLC35F1-PLN | -           | 1.00 | 0 | 2  | 0 | 0 | 0 |
| rs62423969 | rs3902035  | OTHERSIGNAL | 15 SLC35F1-PLN | -           | 1.00 | 0 | 2  | 0 | 0 | 0 |
| rs62423970 | rs3902035  | OTHERSIGNAL | 15 SLC35F1-PLN | -           | 1.00 | 0 | 1  | 0 | 0 | 0 |
| rs62423993 | rs3902035  | OTHERSIGNAL | 15 SLC35F1-PLN | -           | 1.00 | 0 | 1  | 0 | 0 | 0 |
| rs62423994 | rs3902035  | OTHERSIGNAL | 15 SLC35F1-PLN | -           | 0.99 | 0 | 1  | 0 | 0 | 0 |
| rs62423995 | rs3902035  | OTHERSIGNAL | 15 SLC35F1-PLN | -           | 0.99 | 0 | 3  | 0 | 0 | 0 |
| rs62423996 | rs3902035  | OTHERSIGNAL | 15 SLC35F1-PLN | -           | 0.87 | 0 | 0  | 0 | 0 | 0 |
| rs62423997 | rs3902035  | OTHERSIGNAL | 15 SLC35F1-PLN | -           | 0.99 | 0 | 0  | 0 | 0 | 0 |
| rs62423999 | rs3902035  | OTHERSIGNAL | 15 SLC35F1-PLN | -           | 0.99 | 0 | 4  | 0 | 0 | 0 |
| rs62424000 | rs3902035  | OTHERSIGNAL | 15 SLC35F1-PLN | -           | 0.98 | 0 | 5  | 0 | 0 | 0 |
| rs6906332  | rs11153730 | INDEX       | 15 SLC35F1-PLN | -           | 0.83 | 0 | 0  | 0 | 0 | 0 |
| rs6911035  | rs11153730 | INDEX       | 15 SLC35F1-PLN | -           | 0.83 | 0 | 0  | 0 | 0 | 0 |
| rs6911094  | rs457162   | OTHERSIGNAL | 15 SLC35F1-PLN | 6.02E-19    | 1.00 | 0 | 2  | 0 | 0 | 0 |
| rs6911339  | rs11153730 | INDEX       | 15 SLC35F1-PLN | 9.58E-55    | 0.83 | 0 | 0  | 0 | 0 | 0 |
| rs6917963  | rs457162   | OTHERSIGNAL | 15 SLC35F1-PLN | 4.65E-19    | 1.00 | 0 | 3  | 0 | 0 | 0 |
| rs6921633  | rs457162   | OTHERSIGNAL | 15 SLC35F1-PLN | 2.61E-19    | 1.00 | 0 | 3  | 0 | 0 | 0 |
| rs6921657  | rs457162   | OTHERSIGNAL | 15 SLC35F1-PLN | 1.83E-19    | 1.00 | 0 | 3  | 0 | 0 | 0 |
| rs6933344  | rs457162   | OTHERSIGNAL | 15 SLC35F1-PLN | 7.63E-19    | 0.98 | 0 | 2  | 0 | 0 | 0 |
| rs72967533 | rs11153730 | INDEX       | 15 SLC35F1-PLN | -           | 0.97 | 0 | 3  | 0 | 0 | 0 |
| rs74640693 | rs12210733 | OTHERSIGNAL | 15 SLC35F1-PLN | -           | 0.89 | 0 | 0  | 0 | 0 | 0 |
| rs7748215  | rs457162   | OTHERSIGNAL | 15 SLC35F1-PLN | -           | 1.00 | 0 | 0  | 0 | 0 | 0 |
| rs7768436  | rs457162   | OTHERSIGNAL | 15 SLC35F1-PLN | 4.66E-19    | 1.00 | 0 | 2  | 0 | 0 | 0 |
| rs77710920 | rs12210733 | OTHERSIGNAL | 15 SLC35F1-PLN | -           | 0.86 | 1 | 0  | 1 | 0 | 0 |
| rs7772845  | rs11153730 | INDEX       | 15 SLC35F1-PLN | 3.42E-55    | 0.83 | 0 | 4  | 1 | 0 | 0 |
| rs78757409 | rs11153730 | INDEX       | 15 SLC35F1-PLN | -           | 0.80 | 0 | 1  | 0 | 0 | 0 |
| rs928598   | rs457162   | OTHERSIGNAL | 15 SLC35F1-PLN | 5.19E-20    | 0.81 | 0 | 0  | 0 | 0 | 0 |
| rs928599   | rs457162   | OTHERSIGNAL | 15 SLC35F1-PLN | 0.017188    | 0.81 | 0 | 0  | 0 | 0 | 0 |
| rs9320645  | rs457162   | OTHERSIGNAL | 15 SLC35F1-PLN | 0.019385    | 1.00 | 0 | 1  | 0 | 0 | 0 |
| rs9481771  | rs457162   | OTHERSIGNAL | 15 SLC35F1-PLN | 0.035452    | 0.92 | 0 | 0  | 0 | 0 | 0 |
| rs9481772  | rs457162   | OTHERSIGNAL | 15 SLC35F1-PLN | 2.75E-19    | 1.00 | 0 | 1  | 0 | 0 | 0 |
| rs9489323  | rs457162   | OTHERSIGNAL | 15 SLC35F1-PLN | -           | 1.00 | 0 | 0  | 0 | 0 | 0 |
| rs9489324  | rs457162   | OTHERSIGNAL | 15 SLC35F1-PLN | 3.45E-19    | 1.00 | 0 | 0  | 0 | 0 | 0 |
| rs9489325  | rs457162   | OTHERSIGNAL | 15 SLC35F1-PLN | 5.55E-20    | 0.81 | 0 | 0  | 0 | 0 | 0 |
| rs9489510  | rs9489510  | OTHERSIGNAL | 15 SLC35F1-PLN | 1.3596E-08  | 1.00 | 0 | 16 | 0 | 0 | 0 |
| rs980916   | rs457162   | OTHERSIGNAL | 15 SLC35F1-PLN | 3.22E-19    | 1.00 | 0 | 0  | 0 | 0 | 0 |
| rs9920     | rs9920     | INDEX       | 16 CAV1        | 2.6008E-08  | 1.00 | 0 | 9  | 1 | 1 | 1 |

|             |            |             |          |            |      |   |    |   |   |   |
|-------------|------------|-------------|----------|------------|------|---|----|---|---|---|
| rs1805121   | rs3807375  | OTHERSIGNAL | 17 KCN2  | 7.44E-33   | 0.84 | 0 | 0  | 1 | 0 | 0 |
| rs2072413   | rs2072413  | INDEX       | 17 KCN2  | 1.32E-49   | 1.00 | 0 | 2  | 1 | 0 | 0 |
| rs3807375   | rs3807375  | OTHERSIGNAL | 17 KCN2  | 2.88E-33   | 1.00 | 1 | 27 | 1 | 0 | 1 |
| rs10504469  | rs16936870 | INDEX       | 18 NCOA2 | 2.6074E-08 | 0.95 | 1 | 11 | 1 | 0 | 0 |
| rs10504474  | rs16936870 | INDEX       | 18 NCOA2 | 1.975E-09  | 0.98 | 0 | 24 | 1 | 0 | 1 |
| rs10504476  | rs16936870 | INDEX       | 18 NCOA2 | 5.917E-09  | 0.98 | 0 | 10 | 0 | 0 | 0 |
| rs10957519  | rs16936870 | INDEX       | 18 NCOA2 | 5.8135E-09 | 0.98 | 0 | 1  | 0 | 0 | 0 |
| rs10957520  | rs16936870 | INDEX       | 18 NCOA2 | 8.4789E-09 | 0.98 | 0 | 48 | 0 | 1 | 0 |
| rs11776287  | rs16936870 | INDEX       | 18 NCOA2 | 7.7381E-09 | 0.95 | 0 | 0  | 0 | 0 | 0 |
| rs11776606  | rs16936870 | INDEX       | 18 NCOA2 | 0.0029361  | 0.95 | 0 | 0  | 0 | 0 | 0 |
| rs11777095  | rs16936870 | INDEX       | 18 NCOA2 | 2.388E-09  | 0.95 | 0 | 45 | 0 | 0 | 0 |
| rs11777780  | rs16936870 | INDEX       | 18 NCOA2 | 0.00072038 | 0.98 | 0 | 20 | 0 | 0 | 0 |
| rs11780251  | rs16936870 | INDEX       | 18 NCOA2 | 6.1428E-09 | 0.98 | 0 | 2  | 0 | 0 | 0 |
| rs11780609  | rs16936870 | INDEX       | 18 NCOA2 | 2.2642E-08 | 0.95 | 0 | 38 | 0 | 0 | 0 |
| rs11780758  | rs16936870 | INDEX       | 18 NCOA2 | 2.4234E-09 | 0.94 | 0 | 53 | 0 | 0 | 0 |
| rs11780994  | rs16936870 | INDEX       | 18 NCOA2 | 4.1213E-09 | 0.96 | 0 | 3  | 0 | 0 | 0 |
| rs11993276  | rs16936870 | INDEX       | 18 NCOA2 | 1.2749E-08 | 0.95 | 0 | 0  | 0 | 0 | 0 |
| rs11998005  | rs16936870 | INDEX       | 18 NCOA2 | 7.4718E-09 | 0.93 | 0 | 1  | 0 | 0 | 0 |
| rs12675593  | rs16936870 | INDEX       | 18 NCOA2 | 2.0764E-09 | 0.95 | 0 | 11 | 0 | 0 | 0 |
| rs12675772  | rs16936870 | INDEX       | 18 NCOA2 | 1.7554E-09 | 1.00 | 1 | 8  | 0 | 1 | 0 |
| rs12678300  | rs16936870 | INDEX       | 18 NCOA2 | 4.0511E-09 | 0.98 | 0 | 0  | 0 | 0 | 0 |
| rs12681491  | rs16936870 | INDEX       | 18 NCOA2 | 7.0558E-09 | 0.98 | 0 | 3  | 0 | 0 | 0 |
| rs12682284  | rs16936870 | INDEX       | 18 NCOA2 | 3.186E-09  | 0.96 | 0 | 7  | 0 | 0 | 0 |
| rs13254587  | rs16936870 | INDEX       | 18 NCOA2 | -          | 1.00 | 0 | 2  | 0 | 0 | 0 |
| rs13255359  | rs16936870 | INDEX       | 18 NCOA2 | 4.167E-09  | 0.98 | 0 | 30 | 0 | 0 | 0 |
| rs13260060  | rs16936870 | INDEX       | 18 NCOA2 | 2.0187E-09 | 1.00 | 0 | 0  | 0 | 0 | 0 |
| rs13266875  | rs16936870 | INDEX       | 18 NCOA2 | -          | 0.98 | 0 | 7  | 0 | 0 | 0 |
| rs13276452  | rs16936870 | INDEX       | 18 NCOA2 | 0.0027788  | 0.86 | 0 | 3  | 0 | 0 | 0 |
| rs13277206  | rs16936870 | INDEX       | 18 NCOA2 | 2.7548E-09 | 1.00 | 0 | 2  | 0 | 0 | 0 |
| rs142937720 | rs16936870 | INDEX       | 18 NCOA2 | -          | 0.95 | 0 | 4  | 0 | 0 | 0 |
| rs145139458 | rs16936870 | INDEX       | 18 NCOA2 | -          | 0.93 | 0 | 8  | 0 | 0 | 0 |
| rs16936749  | rs16936870 | INDEX       | 18 NCOA2 | -          | 0.87 | 0 | 2  | 0 | 0 | 0 |
| rs16936761  | rs16936870 | INDEX       | 18 NCOA2 | 1.8342E-08 | 0.88 | 0 | 3  | 0 | 0 | 0 |
| rs16936861  | rs16936870 | INDEX       | 18 NCOA2 | 2.1933E-09 | 0.99 | 0 | 11 | 0 | 0 | 0 |
| rs16936870  | rs16936870 | INDEX       | 18 NCOA2 | 1.051E-09  | 1.00 | 0 | 2  | 0 | 0 | 0 |
| rs16936880  | rs16936870 | INDEX       | 18 NCOA2 | 2.157E-09  | 1.00 | 0 | 5  | 0 | 0 | 0 |
| rs16936968  | rs16936870 | INDEX       | 18 NCOA2 | 6.8277E-09 | 0.98 | 1 | 5  | 0 | 0 | 0 |
| rs16937002  | rs16936870 | INDEX       | 18 NCOA2 | 2.6924E-09 | 0.92 | 0 | 0  | 0 | 0 | 0 |
| rs16937019  | rs16936870 | INDEX       | 18 NCOA2 | 6.4588E-09 | 0.91 | 0 | 2  | 0 | 0 | 0 |
| rs1903343   | rs16936870 | INDEX       | 18 NCOA2 | 0.00068982 | 0.98 | 0 | 3  | 0 | 0 | 0 |
| rs201613522 | rs16936870 | INDEX       | 18 NCOA2 | -          | 0.98 | 0 | 40 | 0 | 1 | 0 |
| rs28374075  | rs16936870 | INDEX       | 18 NCOA2 | 0.00090577 | 0.98 | 1 | 4  | 0 | 0 | 0 |
| rs2926698   | rs16936870 | INDEX       | 18 NCOA2 | 2.2592E-09 | 0.91 | 0 | 0  | 0 | 0 | 0 |
| rs2926699   | rs16936870 | INDEX       | 18 NCOA2 | -          | 1.00 | 0 | 0  | 0 | 0 | 0 |
| rs2926700   | rs16936870 | INDEX       | 18 NCOA2 | 2.115E-09  | 1.00 | 0 | 0  | 0 | 0 | 1 |
| rs2926702   | rs16936870 | INDEX       | 18 NCOA2 | 8.3092E-08 | 0.80 | 1 | 12 | 0 | 1 | 1 |
| rs2926705   | rs16936870 | INDEX       | 18 NCOA2 | 2.1109E-09 | 0.98 | 0 | 1  | 0 | 0 | 0 |
| rs2926714   | rs16936870 | INDEX       | 18 NCOA2 | 3.6228E-09 | 0.98 | 0 | 0  | 0 | 0 | 0 |
| rs2926718   | rs16936870 | INDEX       | 18 NCOA2 | 3.8989E-09 | 0.96 | 0 | 2  | 0 | 0 | 0 |
| rs2958368   | rs16936870 | INDEX       | 18 NCOA2 | 2.4231E-09 | 0.98 | 0 | 5  | 0 | 0 | 0 |
| rs2958370   | rs16936870 | INDEX       | 18 NCOA2 | 3.4756E-08 | 0.91 | 0 | 0  | 0 | 0 | 0 |
| rs2958371   | rs16936870 | INDEX       | 18 NCOA2 | 3.656E-08  | 0.93 | 0 | 0  | 0 | 0 | 0 |
| rs2977982   | rs16936870 | INDEX       | 18 NCOA2 | 2.0677E-09 | 0.98 | 0 | 4  | 0 | 0 | 0 |
| rs2977984   | rs16936870 | INDEX       | 18 NCOA2 | 2.0063E-08 | 0.91 | 0 | 5  | 0 | 0 | 0 |
| rs2977987   | rs16936870 | INDEX       | 18 NCOA2 | 2.1401E-08 | 0.98 | 0 | 2  | 0 | 0 | 0 |
| rs2979638   | rs16936870 | INDEX       | 18 NCOA2 | 1.7564E-08 | 0.90 | 0 | 1  | 0 | 0 | 0 |
| rs34220425  | rs16936870 | INDEX       | 18 NCOA2 | -          | 0.90 | 0 | 1  | 0 | 0 | 0 |
| rs34246353  | rs16936870 | INDEX       | 18 NCOA2 | 0.00040575 | 0.88 | 0 | 8  | 0 | 0 | 0 |
| rs34280145  | rs16936870 | INDEX       | 18 NCOA2 | 0.0028243  | 0.92 | 0 | 0  | 0 | 0 | 0 |
| rs34726915  | rs16936870 | INDEX       | 18 NCOA2 | -          | 0.86 | 0 | 11 | 0 | 0 | 0 |
| rs34738535  | rs16936870 | INDEX       | 18 NCOA2 | -          | 0.94 | 0 | 0  | 0 | 0 | 0 |
| rs34937845  | rs16936870 | INDEX       | 18 NCOA2 | -          | 0.92 | 0 | 0  | 0 | 0 | 0 |
| rs34957854  | rs16936870 | INDEX       | 18 NCOA2 | -          | 0.98 | 0 | 8  | 0 | 1 | 0 |
| rs34966562  | rs16936870 | INDEX       | 18 NCOA2 | -          | 0.98 | 0 | 16 | 0 | 0 | 0 |
| rs35006067  | rs16936870 | INDEX       | 18 NCOA2 | 0.00067012 | 0.96 | 0 | 11 | 0 | 0 | 0 |
| rs35050697  | rs16936870 | INDEX       | 18 NCOA2 | 0.00090577 | 0.98 | 1 | 12 | 0 | 0 | 0 |
| rs35060705  | rs16936870 | INDEX       | 18 NCOA2 | -          | 0.98 | 0 | 13 | 0 | 0 | 0 |
| rs35124548  | rs16936870 | INDEX       | 18 NCOA2 | 0.00067012 | 0.95 | 1 | 17 | 0 | 1 | 0 |
| rs35168212  | rs16936870 | INDEX       | 18 NCOA2 | -          | 0.87 | 0 | 2  | 0 | 0 | 0 |
| rs35229942  | rs16936870 | INDEX       | 18 NCOA2 | 0.0029361  | 0.95 | 0 | 16 | 0 | 0 | 0 |
| rs35380946  | rs16936870 | INDEX       | 18 NCOA2 | -          | 0.92 | 0 | 0  | 0 | 0 | 0 |
| rs35386521  | rs16936870 | INDEX       | 18 NCOA2 | 0.00072038 | 0.98 | 1 | 58 | 0 | 1 | 0 |
| rs35395175  | rs16936870 | INDEX       | 18 NCOA2 | 0.000909   | 1.00 | 0 | 0  | 0 | 0 | 0 |
| rs35607891  | rs16936870 | INDEX       | 18 NCOA2 | -          | 0.82 | 0 | 2  | 0 | 0 | 0 |
| rs35825351  | rs16936870 | INDEX       | 18 NCOA2 | -          | 0.96 | 0 | 1  | 0 | 0 | 0 |
| rs4074358   | rs16936870 | INDEX       | 18 NCOA2 | 2.6327E-08 | 0.88 | 0 | 11 | 0 | 0 | 0 |
| rs4146466   | rs16936870 | INDEX       | 18 NCOA2 | 7.2569E-09 | 0.98 | 0 | 21 | 0 | 0 | 0 |
| rs4236982   | rs16936870 | INDEX       | 18 NCOA2 | 6.6453E-09 | 0.95 | 0 | 0  | 0 | 0 | 0 |
| rs4410938   | rs16936870 | INDEX       | 18 NCOA2 | -          | 0.98 | 0 | 4  | 0 | 0 | 0 |
| rs4483195   | rs16936870 | INDEX       | 18 NCOA2 | 4.9804E-09 | 0.98 | 0 | 50 | 0 | 0 | 0 |
| rs4512408   | rs16936870 | INDEX       | 18 NCOA2 | 1.9401E-09 | 0.95 | 0 | 11 | 1 | 0 | 0 |
| rs4645588   | rs16936870 | INDEX       | 18 NCOA2 | 0.0014207  | 0.95 | 0 | 4  | 0 | 0 | 0 |
| rs4737300   | rs16936870 | INDEX       | 18 NCOA2 | 2.4571E-08 | 0.95 | 0 | 6  | 0 | 0 | 0 |
| rs4737302   | rs16936870 | INDEX       | 18 NCOA2 | 0.00057709 | 0.98 | 0 | 0  | 0 | 0 | 0 |
| rs4738079   | rs16936870 | INDEX       | 18 NCOA2 | 9.1126E-09 | 0.98 | 1 | 50 | 0 | 1 | 0 |
| rs56933287  | rs16936870 | INDEX       | 18 NCOA2 | -          | 0.88 | 0 | 7  | 0 | 0 | 0 |
| rs57881093  | rs16936870 | INDEX       | 18 NCOA2 | -          | 0.96 | 0 | 0  | 0 | 0 | 0 |
| rs5892231   | rs16936870 | INDEX       | 18 NCOA2 | -          | 0.98 | 0 | 12 | 0 | 0 | 0 |
| rs60034031  | rs16936870 | INDEX       | 18 NCOA2 | -          | 0.98 | 1 | 14 | 0 | 0 | 0 |
| rs60195405  | rs16936870 | INDEX       | 18 NCOA2 | -          | 0.94 | 0 | 7  | 0 | 0 | 0 |
| rs6472512   | rs16936870 | INDEX       | 18 NCOA2 | 5.0938E-09 | 0.95 | 0 | 13 | 0 | 0 | 0 |
| rs67939803  | rs16936870 | INDEX       | 18 NCOA2 | -          | 0.95 | 0 | 17 | 0 | 0 | 0 |



|             |            |       |            |            |      |   |    |   |   |   |
|-------------|------------|-------|------------|------------|------|---|----|---|---|---|
| rs6986625   | rs16936870 | INDEX | 18 NCOA2   | 3.9952E-09 | 0.92 | 0 | 6  | 0 | 0 | 0 |
| rs6987924   | rs16936870 | INDEX | 18 NCOA2   | 3.0722E-09 | 0.92 | 1 | 59 | 1 | 1 | 1 |
| rs7001409   | rs16936870 | INDEX | 18 NCOA2   | 8.2992E-09 | 0.95 | 0 | 18 | 0 | 0 | 0 |
| rs7003091   | rs16936870 | INDEX | 18 NCOA2   | 2.7447E-09 | 1.00 | 0 | 1  | 0 | 0 | 0 |
| rs7005564   | rs16936870 | INDEX | 18 NCOA2   | -          | 0.95 | 0 | 0  | 0 | 0 | 0 |
| rs7006399   | rs16936870 | INDEX | 18 NCOA2   | 1.7905E-07 | 0.86 | 0 | 0  | 0 | 0 | 0 |
| rs7012908   | rs16936870 | INDEX | 18 NCOA2   | 6.1003E-09 | 0.98 | 0 | 15 | 0 | 0 | 0 |
| rs71523180  | rs16936870 | INDEX | 18 NCOA2   | -          | 0.98 | 0 | 7  | 0 | 0 | 0 |
| rs71523181  | rs16936870 | INDEX | 18 NCOA2   | -          | 0.98 | 0 | 2  | 0 | 0 | 0 |
| rs71558586  | rs16936870 | INDEX | 18 NCOA2   | -          | 0.96 | 0 | 54 | 0 | 0 | 0 |
| rs726285    | rs16936870 | INDEX | 18 NCOA2   | 1.9662E-08 | 0.92 | 0 | 3  | 0 | 0 | 0 |
| rs74783055  | rs16936870 | INDEX | 18 NCOA2   | -          | 0.94 | 0 | 18 | 0 | 0 | 0 |
| rs78167479  | rs16936870 | INDEX | 18 NCOA2   | -          | 0.94 | 0 | 18 | 0 | 0 | 0 |
| rs9918828   | rs16936870 | INDEX | 18 NCOA2   | 0.0012079  | 0.94 | 0 | 1  | 0 | 0 | 0 |
| rs10504980  | rs11779860 | INDEX | 19 LAPTM4B | 6.0542E-10 | 0.98 | 0 | 1  | 0 | 0 | 0 |
| rs10504981  | rs11779860 | INDEX | 19 LAPTM4B | 7E-10      | 0.98 | 0 | 1  | 0 | 0 | 0 |
| rs11779860  | rs11779860 | INDEX | 19 LAPTM4B | 1.6869E-10 | 1.00 | 0 | 1  | 0 | 0 | 0 |
| rs13256148  | rs11779860 | INDEX | 19 LAPTM4B | -          | 0.84 | 0 | 1  | 0 | 0 | 0 |
| rs17827449  | rs11779860 | INDEX | 19 LAPTM4B | -          | 0.98 | 0 | 1  | 0 | 0 | 0 |
| rs17827519  | rs11779860 | INDEX | 19 LAPTM4B | 2.3177E-09 | 0.98 | 0 | 1  | 0 | 0 | 0 |
| rs1872015   | rs11779860 | INDEX | 19 LAPTM4B | 5.5136E-09 | 0.84 | 1 | 19 | 1 | 0 | 1 |
| rs1872016   | rs11779860 | INDEX | 19 LAPTM4B | 6.4768E-09 | 0.83 | 1 | 19 | 1 | 0 | 1 |
| rs1872017   | rs11779860 | INDEX | 19 LAPTM4B | 7.8932E-09 | 0.84 | 1 | 19 | 1 | 0 | 1 |
| rs2449530   | rs11779860 | INDEX | 19 LAPTM4B | -          | 0.83 | 0 | 1  | 0 | 0 | 0 |
| rs2449541   | rs11779860 | INDEX | 19 LAPTM4B | 2.0161E-09 | 0.84 | 1 | 8  | 1 | 0 | 0 |
| rs2449550   | rs11779860 | INDEX | 19 LAPTM4B | 6.3579E-09 | 0.83 | 0 | 2  | 0 | 0 | 0 |
| rs2512057   | rs11779860 | INDEX | 19 LAPTM4B | 5.4831E-09 | 0.83 | 0 | 3  | 0 | 0 | 0 |
| rs2512058   | rs11779860 | INDEX | 19 LAPTM4B | -          | 0.83 | 1 | 7  | 0 | 0 | 0 |
| rs2512061   | rs11779860 | INDEX | 19 LAPTM4B | 5.9207E-09 | 0.84 | 0 | 23 | 1 | 0 | 0 |
| rs2513967   | rs11779860 | INDEX | 19 LAPTM4B | 5.2778E-09 | 0.83 | 0 | 3  | 0 | 0 | 0 |
| rs2513968   | rs11779860 | INDEX | 19 LAPTM4B | 7.9414E-09 | 0.84 | 0 | 21 | 1 | 0 | 0 |
| rs34039147  | rs11779860 | INDEX | 19 LAPTM4B | -          | 0.90 | 0 | 1  | 0 | 0 | 0 |
| rs34567914  | rs11779860 | INDEX | 19 LAPTM4B | -          | 0.85 | 0 | 0  | 0 | 0 | 0 |
| rs34673051  | rs11779860 | INDEX | 19 LAPTM4B | -          | 0.98 | 0 | 3  | 0 | 0 | 0 |
| rs4410873   | rs11779860 | INDEX | 19 LAPTM4B | -          | 0.90 | 0 | 0  | 0 | 0 | 0 |
| rs55987368  | rs11779860 | INDEX | 19 LAPTM4B | -          | 0.90 | 0 | 3  | 0 | 0 | 0 |
| rs67764958  | rs11779860 | INDEX | 19 LAPTM4B | -          | 0.97 | 0 | 15 | 0 | 0 | 0 |
| rs6983263   | rs11779860 | INDEX | 19 LAPTM4B | -          | 0.84 | 0 | 0  | 0 | 0 | 0 |
| rs6986429   | rs11779860 | INDEX | 19 LAPTM4B | 4.9263E-10 | 0.97 | 0 | 15 | 0 | 0 | 0 |
| rs6986810   | rs11779860 | INDEX | 19 LAPTM4B | 4.7785E-10 | 0.98 | 0 | 14 | 0 | 0 | 0 |
| rs6992805   | rs11779860 | INDEX | 19 LAPTM4B | -          | 0.98 | 0 | 1  | 0 | 0 | 0 |
| rs6994620   | rs11779860 | INDEX | 19 LAPTM4B | 3.0971E-10 | 0.97 | 1 | 7  | 0 | 0 | 0 |
| rs7004556   | rs11779860 | INDEX | 19 LAPTM4B | 3.9937E-10 | 0.97 | 0 | 15 | 0 | 0 | 0 |
| rs7004748   | rs11779860 | INDEX | 19 LAPTM4B | 4.6943E-10 | 0.98 | 0 | 14 | 0 | 0 | 0 |
| rs7014909   | rs11779860 | INDEX | 19 LAPTM4B | 9.4616E-10 | 0.98 | 0 | 1  | 0 | 0 | 0 |
| rs7015672   | rs11779860 | INDEX | 19 LAPTM4B | -          | 0.94 | 0 | 1  | 0 | 0 | 0 |
| rs1961102   | rs1961102  | INDEX | 20 AZIN1   | 3.4067E-09 | 1.00 | 0 | 32 | 1 | 1 | 0 |
| rs2679744   | rs1961102  | INDEX | 20 AZIN1   | -          | 0.86 | 0 | 7  | 0 | 0 | 0 |
| rs606335    | rs1961102  | INDEX | 20 AZIN1   | -          | 0.89 | 0 | 9  | 0 | 0 | 0 |
| rs10786665  | rs2485376  | INDEX | 21 GBF1    | -          | 0.95 | 0 | 0  | 0 | 0 | 0 |
| rs1081655   | rs2485376  | INDEX | 21 GBF1    | -          | 0.99 | 0 | 1  | 0 | 0 | 0 |
| rs11191245  | rs2485376  | INDEX | 21 GBF1    | -          | 0.98 | 0 | 0  | 0 | 0 | 0 |
| rs11191267  | rs2485376  | INDEX | 21 GBF1    | 3.9695E-08 | 0.95 | 0 | 0  | 0 | 0 | 0 |
| rs11312135  | rs2485376  | INDEX | 21 GBF1    | -          | 0.97 | 0 | 6  | 0 | 0 | 0 |
| rs11814894  | rs2485376  | INDEX | 21 GBF1    | -          | 0.95 | 0 | 0  | 0 | 0 | 0 |
| rs146574493 | rs2485376  | INDEX | 21 GBF1    | -          | 0.90 | 0 | 0  | 0 | 0 | 0 |
| rs148921436 | rs2485376  | INDEX | 21 GBF1    | -          | 0.99 | 0 | 1  | 0 | 0 | 0 |
| rs1541046   | rs2485376  | INDEX | 21 GBF1    | 4.9269E-08 | 0.97 | 0 | 0  | 0 | 0 | 0 |
| rs1541047   | rs2485376  | INDEX | 21 GBF1    | 0.0078094  | 0.84 | 0 | 5  | 0 | 0 | 0 |
| rs1541048   | rs2485376  | INDEX | 21 GBF1    | -          | 0.97 | 0 | 5  | 0 | 0 | 0 |
| rs1541049   | rs2485376  | INDEX | 21 GBF1    | -          | 0.97 | 0 | 6  | 0 | 0 | 0 |
| rs1796765   | rs2485376  | INDEX | 21 GBF1    | 3.5146E-08 | 0.97 | 0 | 37 | 1 | 0 | 1 |
| rs1854291   | rs2485376  | INDEX | 21 GBF1    | 0.014535   | 0.96 | 0 | 0  | 0 | 0 | 0 |
| rs202032433 | rs2485376  | INDEX | 21 GBF1    | -          | 0.88 | 0 | 5  | 0 | 0 | 0 |
| rs2246775   | rs2485376  | INDEX | 21 GBF1    | 3.6788E-08 | 0.98 | 0 | 2  | 0 | 0 | 0 |
| rs2273555   | rs2485376  | INDEX | 21 GBF1    | 6.8418E-08 | 0.88 | 0 | 0  | 0 | 0 | 0 |
| rs2281983   | rs2485376  | INDEX | 21 GBF1    | -          | 0.96 | 1 | 5  | 1 | 0 | 0 |
| rs2479548   | rs2485376  | INDEX | 21 GBF1    | -          | 0.97 | 0 | 0  | 0 | 0 | 0 |
| rs2479551   | rs2485376  | INDEX | 21 GBF1    | 4.2515E-08 | 0.99 | 0 | 1  | 0 | 0 | 0 |
| rs2479552   | rs2485376  | INDEX | 21 GBF1    | -          | 0.98 | 1 | 36 | 1 | 1 | 1 |
| rs2479555   | rs2485376  | INDEX | 21 GBF1    | -          | 0.98 | 0 | 3  | 0 | 1 | 1 |
| rs2485371   | rs2485376  | INDEX | 21 GBF1    | 0.0030816  | 0.99 | 1 | 22 | 1 | 0 | 1 |
| rs2485374   | rs2485376  | INDEX | 21 GBF1    | 3.6783E-08 | 1.00 | 0 | 5  | 0 | 0 | 0 |
| rs2485375   | rs2485376  | INDEX | 21 GBF1    | -          | 1.00 | 0 | 1  | 0 | 1 | 0 |
| rs2485376   | rs2485376  | INDEX | 21 GBF1    | 2.6914E-08 | 1.00 | 0 | 1  | 0 | 1 | 0 |
| rs2485378   | rs2485376  | INDEX | 21 GBF1    | 3.2351E-08 | 0.97 | 1 | 14 | 0 | 1 | 1 |
| rs2993089   | rs2485376  | INDEX | 21 GBF1    | -          | 0.96 | 0 | 1  | 0 | 0 | 0 |
| rs3061705   | rs2485376  | INDEX | 21 GBF1    | -          | 0.99 | 0 | 5  | 0 | 0 | 0 |
| rs3758551   | rs2485376  | INDEX | 21 GBF1    | -          | 0.94 | 0 | 26 | 0 | 0 | 0 |
| rs3758552   | rs2485376  | INDEX | 21 GBF1    | -          | 0.96 | 0 | 0  | 0 | 0 | 0 |
| rs3758553   | rs2485376  | INDEX | 21 GBF1    | 1.6277E-07 | 0.96 | 0 | 0  | 0 | 0 | 0 |
| rs3781295   | rs2485376  | INDEX | 21 GBF1    | -          | 0.88 | 0 | 0  | 0 | 0 | 0 |
| rs3802681   | rs2485376  | INDEX | 21 GBF1    | 3.5016E-08 | 0.95 | 0 | 0  | 0 | 0 | 0 |
| rs3808938   | rs2485376  | INDEX | 21 GBF1    | 6.4749E-08 | 0.96 | 0 | 0  | 0 | 0 | 0 |
| rs4244350   | rs2485376  | INDEX | 21 GBF1    | 4.1253E-08 | 0.97 | 0 | 32 | 0 | 1 | 0 |
| rs4244351   | rs2485376  | INDEX | 21 GBF1    | 4.3316E-08 | 0.97 | 0 | 25 | 0 | 1 | 0 |
| rs4331020   | rs2485376  | INDEX | 21 GBF1    | 3.6355E-08 | 0.95 | 0 | 28 | 0 | 0 | 0 |
| rs4919620   | rs2485376  | INDEX | 21 GBF1    | 0.012283   | 0.97 | 0 | 4  | 0 | 0 | 0 |
| rs4919621   | rs2485376  | INDEX | 21 GBF1    | 1.557E-07  | 0.97 | 0 | 4  | 0 | 0 | 0 |
| rs4919622   | rs2485376  | INDEX | 21 GBF1    | 0.0043929  | 0.98 | 0 | 0  | 0 | 0 | 0 |
| rs4919623   | rs2485376  | INDEX | 21 GBF1    | 4.5771E-08 | 0.97 | 0 | 1  | 0 | 0 | 0 |
| rs56115161  | rs2485376  | INDEX | 21 GBF1    | -          | 0.96 | 0 | 0  | 0 | 0 | 0 |

|             |           |             |           |             |      |   |    |   |   |   |
|-------------|-----------|-------------|-----------|-------------|------|---|----|---|---|---|
| rs58626853  | rs2485376 | INDEX       | 21 GBF1   | -           | 0.96 | 1 | 32 | 0 | 1 | 0 |
| rs7080055   | rs2485376 | INDEX       | 21 GBF1   | 5.2645E-08  | 0.97 | 0 | 38 | 0 | 1 | 0 |
| rs72490587  | rs2485376 | INDEX       | 21 GBF1   | -           | 0.95 | 1 | 3  | 0 | 0 | 0 |
| rs72845663  | rs2485376 | INDEX       | 21 GBF1   | -           | 0.93 | 0 | 1  | 0 | 0 | 0 |
| rs72845670  | rs2485376 | INDEX       | 21 GBF1   | -           | 0.89 | 0 | 0  | 0 | 0 | 0 |
| rs733283    | rs2485376 | INDEX       | 21 GBF1   | 7.2381E-08  | 0.97 | 0 | 4  | 0 | 0 | 0 |
| rs74309119  | rs2485376 | INDEX       | 21 GBF1   | -           | 0.92 | 0 | 0  | 0 | 0 | 0 |
| rs772008    | rs2485376 | INDEX       | 21 GBF1   | 0.0067139   | 0.97 | 0 | 4  | 0 | 0 | 0 |
| rs772010    | rs2485376 | INDEX       | 21 GBF1   | -           | 0.97 | 0 | 1  | 0 | 0 | 0 |
| rs772012    | rs2485376 | INDEX       | 21 GBF1   | 4.9753E-08  | 0.97 | 1 | 2  | 0 | 0 | 0 |
| rs772014    | rs2485376 | INDEX       | 21 GBF1   | 4.5923E-08  | 0.91 | 0 | 6  | 0 | 0 | 0 |
| rs772015    | rs2485376 | INDEX       | 21 GBF1   | -           | 0.96 | 0 | 0  | 0 | 0 | 0 |
| rs772016    | rs2485376 | INDEX       | 21 GBF1   | 3.4774E-08  | 0.90 | 0 | 5  | 0 | 0 | 0 |
| rs772018    | rs2485376 | INDEX       | 21 GBF1   | -           | 0.98 | 0 | 1  | 0 | 0 | 0 |
| rs772019    | rs2485376 | INDEX       | 21 GBF1   | -           | 0.97 | 0 | 5  | 0 | 0 | 0 |
| rs772021    | rs2485376 | INDEX       | 21 GBF1   | 1.1365E-07  | 0.99 | 0 | 1  | 0 | 0 | 0 |
| rs772022    | rs2485376 | INDEX       | 21 GBF1   | -           | 0.99 | 0 | 0  | 0 | 0 | 0 |
| rs772023    | rs2485376 | INDEX       | 21 GBF1   | -           | 0.97 | 0 | 1  | 0 | 0 | 0 |
| rs772024    | rs2485376 | INDEX       | 21 GBF1   | -           | 0.93 | 0 | 1  | 0 | 0 | 0 |
| rs772025    | rs2485376 | INDEX       | 21 GBF1   | 3.3681E-08  | 0.97 | 0 | 1  | 0 | 0 | 0 |
| rs772026    | rs2485376 | INDEX       | 21 GBF1   | -           | 0.97 | 1 | 3  | 0 | 0 | 0 |
| rs772027    | rs2485376 | INDEX       | 21 GBF1   | 4.7659E-08  | 0.97 | 1 | 4  | 1 | 0 | 0 |
| rs772028    | rs2485376 | INDEX       | 21 GBF1   | -           | 0.83 | 1 | 6  | 1 | 0 | 0 |
| rs772029    | rs2485376 | INDEX       | 21 GBF1   | 3.5903E-08  | 0.97 | 1 | 40 | 1 | 1 | 1 |
| rs772030    | rs2485376 | INDEX       | 21 GBF1   | 1.5511E-07  | 0.93 | 0 | 6  | 0 | 0 | 0 |
| rs772032    | rs2485376 | INDEX       | 21 GBF1   | -           | 0.98 | 0 | 0  | 0 | 0 | 0 |
| rs772033    | rs2485376 | INDEX       | 21 GBF1   | -           | 0.97 | 0 | 0  | 0 | 0 | 0 |
| rs7916262   | rs2485376 | INDEX       | 21 GBF1   | -           | 0.98 | 0 | 4  | 0 | 0 | 0 |
| rs7923183   | rs2485376 | INDEX       | 21 GBF1   | -           | 0.96 | 0 | 0  | 0 | 0 | 0 |
| rs796427    | rs2485376 | INDEX       | 21 GBF1   | 3.648E-08   | 0.97 | 0 | 5  | 0 | 0 | 0 |
| rs812799    | rs2485376 | INDEX       | 21 GBF1   | 2.7191E-08  | 0.99 | 0 | 1  | 0 | 0 | 0 |
| rs9664049   | rs2485376 | INDEX       | 21 GBF1   | 0.015089    | 0.97 | 0 | 7  | 1 | 0 | 0 |
| rs11821100  | rs7122937 | INDEX       | 22 KCNQ1  | -           | 0.91 | 0 | 0  | 0 | 0 | 0 |
| rs12280952  | rs7122937 | INDEX       | 22 KCNQ1  | 0.000011774 | 0.94 | 0 | 26 | 0 | 1 | 1 |
| rs12296050  | rs7122937 | INDEX       | 22 KCNQ1  | 4.38E-48    | 0.96 | 0 | 21 | 0 | 0 | 0 |
| rs16928285  | rs7122937 | INDEX       | 22 KCNQ1  | 2.57E-52    | 0.84 | 1 | 20 | 1 | 0 | 1 |
| rs16928297  | rs7122937 | INDEX       | 22 KCNQ1  | 2.09E-53    | 0.99 | 1 | 14 | 1 | 0 | 1 |
| rs2074238   | rs2074238 | OTHERSIGNAL | 22 KCNQ1  | 1.86E-28    | 1.00 | 0 | 24 | 1 | 0 | 1 |
| rs2074239   | rs7122937 | INDEX       | 22 KCNQ1  | 5.32E-51    | 0.96 | 0 | 23 | 1 | 0 | 0 |
| rs2301696   | rs2301696 | OTHERSIGNAL | 22 KCNQ1  | 4.2589E-10  | 1.00 | 0 | 2  | 0 | 0 | 0 |
| rs3864884   | rs7122937 | INDEX       | 22 KCNQ1  | 1.03E-52    | 0.83 | 1 | 19 | 1 | 1 | 1 |
| rs58558735  | rs7122937 | INDEX       | 22 KCNQ1  | -           | 0.94 | 0 | 0  | 0 | 0 | 0 |
| rs7122937   | rs7122937 | INDEX       | 22 KCNQ1  | 1.24E-54    | 1.00 | 1 | 16 | 1 | 0 | 1 |
| rs7939542   | rs7122937 | INDEX       | 22 KCNQ1  | 1.50E-50    | 0.96 | 1 | 14 | 1 | 0 | 1 |
| rs7948689   | rs7122937 | INDEX       | 22 KCNQ1  | -           | 0.81 | 1 | 21 | 1 | 1 | 1 |
| rs7948693   | rs7122937 | INDEX       | 22 KCNQ1  | 0.000014241 | 0.82 | 1 | 21 | 1 | 1 | 1 |
| rs7951832   | rs7122937 | INDEX       | 22 KCNQ1  | 1.06E-51    | 0.80 | 1 | 22 | 1 | 1 | 1 |
| rs102274    | rs174583  | INDEX       | 23 FADS2  | -           | 0.82 | 0 | 1  | 0 | 0 | 0 |
| rs102275    | rs174583  | INDEX       | 23 FADS2  | 1.899E-10   | 0.86 | 0 | 1  | 0 | 0 | 0 |
| rs1535      | rs174583  | INDEX       | 23 FADS2  | 2.222E-10   | 0.85 | 0 | 26 | 1 | 1 | 0 |
| rs174533    | rs174583  | INDEX       | 23 FADS2  | -           | 0.81 | 0 | 5  | 1 | 0 | 0 |
| rs174535    | rs174583  | INDEX       | 23 FADS2  | 1.449E-10   | 0.80 | 0 | 5  | 0 | 0 | 0 |
| rs174536    | rs174583  | INDEX       | 23 FADS2  | 1.3582E-10  | 0.81 | 0 | 4  | 0 | 0 | 0 |
| rs174537    | rs174583  | INDEX       | 23 FADS2  | 2.0363E-10  | 0.81 | 0 | 1  | 0 | 0 | 0 |
| rs174545    | rs174583  | INDEX       | 23 FADS2  | 1.714E-10   | 0.82 | 0 | 0  | 0 | 0 | 0 |
| rs174546    | rs174583  | INDEX       | 23 FADS2  | 1.5244E-10  | 0.82 | 0 | 0  | 0 | 0 | 0 |
| rs174547    | rs174583  | INDEX       | 23 FADS2  | 2.9193E-10  | 0.82 | 0 | 0  | 0 | 0 | 0 |
| rs174550    | rs174583  | INDEX       | 23 FADS2  | 1.5079E-10  | 0.82 | 0 | 0  | 0 | 0 | 0 |
| rs174553    | rs174583  | INDEX       | 23 FADS2  | -           | 0.82 | 0 | 0  | 0 | 0 | 0 |
| rs174554    | rs174583  | INDEX       | 23 FADS2  | -           | 0.82 | 0 | 1  | 0 | 0 | 0 |
| rs174562    | rs174583  | INDEX       | 23 FADS2  | -           | 0.82 | 0 | 23 | 1 | 0 | 0 |
| rs174564    | rs174583  | INDEX       | 23 FADS2  | -           | 0.83 | 0 | 24 | 0 | 0 | 0 |
| rs174566    | rs174583  | INDEX       | 23 FADS2  | 0.033673    | 0.86 | 0 | 1  | 0 | 0 | 0 |
| rs174567    | rs174583  | INDEX       | 23 FADS2  | -           | 0.85 | 0 | 0  | 0 | 0 | 0 |
| rs174568    | rs174583  | INDEX       | 23 FADS2  | 0.033673    | 0.83 | 0 | 25 | 0 | 0 | 0 |
| rs174574    | rs174583  | INDEX       | 23 FADS2  | 1.5317E-09  | 0.89 | 0 | 18 | 1 | 1 | 1 |
| rs174576    | rs174583  | INDEX       | 23 FADS2  | 1.7591E-10  | 0.94 | 0 | 12 | 0 | 0 | 0 |
| rs174577    | rs174583  | INDEX       | 23 FADS2  | 1.2964E-10  | 0.94 | 0 | 2  | 0 | 0 | 0 |
| rs174578    | rs174583  | INDEX       | 23 FADS2  | 1.7373E-09  | 1.00 | 0 | 0  | 0 | 0 | 0 |
| rs174580    | rs174583  | INDEX       | 23 FADS2  | -           | 0.96 | 0 | 0  | 0 | 0 | 0 |
| rs174581    | rs174583  | INDEX       | 23 FADS2  | -           | 0.96 | 0 | 0  | 0 | 0 | 0 |
| rs174583    | rs174583  | INDEX       | 23 FADS2  | 8.2073E-11  | 1.00 | 0 | 0  | 1 | 0 | 0 |
| rs174584    | rs174583  | INDEX       | 23 FADS2  | -           | 0.96 | 0 | 1  | 0 | 0 | 0 |
| rs174592    | rs174583  | INDEX       | 23 FADS2  | -           | 0.90 | 1 | 8  | 1 | 1 | 1 |
| rs174594    | rs174583  | INDEX       | 23 FADS2  | -           | 0.88 | 1 | 0  | 0 | 0 | 0 |
| rs174599    | rs174583  | INDEX       | 23 FADS2  | -           | 0.86 | 1 | 6  | 1 | 0 | 0 |
| rs174601    | rs174583  | INDEX       | 23 FADS2  | 2.9326E-10  | 0.87 | 0 | 7  | 0 | 0 | 0 |
| rs3834458   | rs174583  | INDEX       | 23 FADS2  | -           | 0.83 | 0 | 7  | 0 | 0 | 0 |
| rs5792235   | rs174583  | INDEX       | 23 FADS2  | -           | 0.84 | 0 | 0  | 0 | 0 | 0 |
| rs72381599  | rs174583  | INDEX       | 23 FADS2  | -           | 0.82 | 0 | 0  | 0 | 0 | 0 |
| rs97384     | rs174583  | INDEX       | 23 FADS2  | -           | 0.83 | 0 | 0  | 0 | 0 | 0 |
| rs99780     | rs174583  | INDEX       | 23 FADS2  | -           | 0.86 | 0 | 1  | 0 | 0 | 0 |
| rs10774599  | rs3026445 | INDEX       | 24 ATP2A2 | 2.2303E-08  | 0.94 | 0 | 0  | 0 | 0 | 0 |
| rs11065628  | rs3026445 | INDEX       | 24 ATP2A2 | -           | 0.90 | 0 | 0  | 0 | 0 | 0 |
| rs12300631  | rs3026445 | INDEX       | 24 ATP2A2 | -           | 0.83 | 0 | 7  | 0 | 0 | 0 |
| rs1986123   | rs3026445 | INDEX       | 24 ATP2A2 | -           | 0.93 | 1 | 19 | 0 | 0 | 0 |
| rs199567377 | rs3026445 | INDEX       | 24 ATP2A2 | -           | 0.84 | 0 | 1  | 0 | 0 | 0 |
| rs3026427   | rs3026445 | INDEX       | 24 ATP2A2 | 1.6157E-08  | 0.89 | 1 | 9  | 1 | 1 | 0 |
| rs3026445   | rs3026445 | INDEX       | 24 ATP2A2 | 2.9213E-12  | 1.00 | 0 | 24 | 0 | 0 | 0 |
| rs4630352   | rs3026445 | INDEX       | 24 ATP2A2 | 1.0896E-08  | 0.94 | 0 | 4  | 1 | 1 | 0 |
| rs57897915  | rs3026445 | INDEX       | 24 ATP2A2 | -           | 0.80 | 0 | 1  | 0 | 0 | 0 |
| rs58356085  | rs3026445 | INDEX       | 24 ATP2A2 | -           | 0.86 | 0 | 1  | 0 | 0 | 0 |

|             |           |       |                |            |      |   |    |   |   |   |
|-------------|-----------|-------|----------------|------------|------|---|----|---|---|---|
| rs7296679   | rs3026445 | INDEX | 24 ATP2A2      | 4.0863E-08 | 0.88 | 0 | 0  | 0 | 0 | 0 |
| rs17061696  | rs728926  | INDEX | 25 KLF12       | 2.5022E-08 | 0.99 | 0 | 25 | 0 | 0 | 0 |
| rs1886512   | rs728926  | INDEX | 25 KLF12       | 4.2965E-08 | 0.99 | 1 | 49 | 1 | 1 | 0 |
| rs728926    | rs728926  | INDEX | 25 KLF12       | 2.0558E-08 | 1.00 | 0 | 41 | 0 | 0 | 0 |
| rs7992314   | rs728926  | INDEX | 25 KLF12       | -          | 0.99 | 0 | 12 | 0 | 0 | 0 |
| rs9573330   | rs728926  | INDEX | 25 KLF12       | 7.6616E-08 | 1.00 | 0 | 21 | 1 | 0 | 0 |
| rs1046651   | rs2273905 | INDEX | 26 ANKRD9      | -          | 0.84 | 1 | 6  | 1 | 1 | 1 |
| rs10665540  | rs2273905 | INDEX | 26 ANKRD9      | -          | 0.87 | 0 | 0  | 0 | 0 | 0 |
| rs11160691  | rs2273905 | INDEX | 26 ANKRD9      | -          | 0.95 | 0 | 16 | 0 | 0 | 0 |
| rs1190544   | rs2273905 | INDEX | 26 ANKRD9      | -          | 0.90 | 0 | 0  | 0 | 0 | 0 |
| rs1190547   | rs2273905 | INDEX | 26 ANKRD9      | 2.2729E-09 | 0.90 | 0 | 20 | 0 | 0 | 1 |
| rs1190549   | rs2273905 | INDEX | 26 ANKRD9      | -          | 0.91 | 0 | 0  | 0 | 0 | 0 |
| rs1190551   | rs2273905 | INDEX | 26 ANKRD9      | 1.0144E-09 | 0.90 | 0 | 0  | 0 | 0 | 0 |
| rs1190553   | rs2273905 | INDEX | 26 ANKRD9      | -          | 0.91 | 0 | 0  | 0 | 0 | 0 |
| rs1190554   | rs2273905 | INDEX | 26 ANKRD9      | 1.8774E-09 | 0.91 | 0 | 0  | 0 | 0 | 0 |
| rs12894354  | rs2273905 | INDEX | 26 ANKRD9      | -          | 0.97 | 0 | 0  | 0 | 0 | 0 |
| rs1885708   | rs2273905 | INDEX | 26 ANKRD9      | -          | 0.96 | 0 | 0  | 0 | 0 | 0 |
| rs1998422   | rs2273905 | INDEX | 26 ANKRD9      | -          | 1.00 | 0 | 1  | 0 | 0 | 0 |
| rs200222508 | rs2273905 | INDEX | 26 ANKRD9      | -          | 0.88 | 0 | 14 | 0 | 0 | 0 |
| rs200622845 | rs2273905 | INDEX | 26 ANKRD9      | -          | 0.80 | 0 | 9  | 0 | 0 | 0 |
| rs200795901 | rs2273905 | INDEX | 26 ANKRD9      | -          | 0.80 | 0 | 0  | 0 | 0 | 0 |
| rs2273905   | rs2273905 | INDEX | 26 ANKRD9      | 4.0385E-11 | 1.00 | 0 | 23 | 0 | 0 | 0 |
| rs2403058   | rs2273905 | INDEX | 26 ANKRD9      | -          | 0.90 | 0 | 1  | 1 | 0 | 0 |
| rs3742444   | rs2273905 | INDEX | 26 ANKRD9      | -          | 0.84 | 1 | 6  | 1 | 1 | 1 |
| rs4906205   | rs2273905 | INDEX | 26 ANKRD9      | 1.2787E-09 | 0.90 | 0 | 1  | 0 | 0 | 0 |
| rs4906208   | rs2273905 | INDEX | 26 ANKRD9      | 7.5636E-10 | 0.96 | 0 | 6  | 0 | 0 | 0 |
| rs8005804   | rs2273905 | INDEX | 26 ANKRD9      | -          | 0.94 | 0 | 8  | 0 | 0 | 0 |
| rs8017980   | rs2273905 | INDEX | 26 ANKRD9      | -          | 0.96 | 0 | 0  | 0 | 0 | 0 |
| rs942023    | rs2273905 | INDEX | 26 ANKRD9      | -          | 1.00 | 0 | 1  | 1 | 0 | 0 |
| rs9743854   | rs2273905 | INDEX | 26 ANKRD9      | -          | 0.90 | 0 | 1  | 0 | 0 | 0 |
| rs11070798  | rs3105593 | INDEX | 27 USP50-TRPM7 | 1.5055E-07 | 0.84 | 0 | 0  | 0 | 0 | 0 |
| rs11070799  | rs3105593 | INDEX | 27 USP50-TRPM7 | -          | 0.81 | 0 | 0  | 0 | 0 | 0 |
| rs11070805  | rs3105593 | INDEX | 27 USP50-TRPM7 | -          | 0.81 | 0 | 5  | 0 | 0 | 0 |
| rs11633404  | rs3105593 | INDEX | 27 USP50-TRPM7 | -          | 0.94 | 0 | 0  | 0 | 0 | 0 |
| rs11634746  | rs3105593 | INDEX | 27 USP50-TRPM7 | -          | 0.81 | 0 | 0  | 1 | 0 | 0 |
| rs11636964  | rs3105593 | INDEX | 27 USP50-TRPM7 | 1.2532E-07 | 0.81 | 0 | 1  | 0 | 0 | 0 |
| rs11637228  | rs3105593 | INDEX | 27 USP50-TRPM7 | -          | 0.81 | 0 | 1  | 0 | 0 | 0 |
| rs12438305  | rs3105593 | INDEX | 27 USP50-TRPM7 | 9.9412E-08 | 0.81 | 0 | 0  | 0 | 0 | 0 |
| rs12439744  | rs3105593 | INDEX | 27 USP50-TRPM7 | 1.7224E-07 | 0.81 | 0 | 0  | 0 | 0 | 0 |
| rs12442787  | rs3105593 | INDEX | 27 USP50-TRPM7 | 1.0329E-07 | 0.81 | 0 | 0  | 0 | 0 | 0 |
| rs12595151  | rs3105593 | INDEX | 27 USP50-TRPM7 | -          | 0.83 | 0 | 0  | 0 | 0 | 0 |
| rs137968959 | rs3105593 | INDEX | 27 USP50-TRPM7 | -          | 0.80 | 0 | 0  | 0 | 0 | 0 |
| rs141987042 | rs3105593 | INDEX | 27 USP50-TRPM7 | -          | 0.81 | 0 | 0  | 0 | 0 | 0 |
| rs146180371 | rs3105593 | INDEX | 27 USP50-TRPM7 | -          | 0.83 | 0 | 0  | 0 | 0 | 0 |
| rs150820626 | rs3105593 | INDEX | 27 USP50-TRPM7 | -          | 0.92 | 0 | 0  | 0 | 0 | 0 |
| rs17645523  | rs3105593 | INDEX | 27 USP50-TRPM7 | 1.8647E-07 | 0.84 | 0 | 0  | 0 | 0 | 0 |
| rs17645649  | rs3105593 | INDEX | 27 USP50-TRPM7 | -          | 0.81 | 0 | 1  | 0 | 0 | 0 |
| rs17645826  | rs3105593 | INDEX | 27 USP50-TRPM7 | -          | 0.82 | 0 | 0  | 0 | 0 | 0 |
| rs1986074   | rs3105593 | INDEX | 27 USP50-TRPM7 | -          | 0.83 | 0 | 0  | 0 | 0 | 0 |
| rs1986075   | rs3105593 | INDEX | 27 USP50-TRPM7 | -          | 0.96 | 0 | 0  | 0 | 0 | 0 |
| rs2003359   | rs3105593 | INDEX | 27 USP50-TRPM7 | -          | 0.96 | 0 | 0  | 0 | 0 | 0 |
| rs2011064   | rs3105593 | INDEX | 27 USP50-TRPM7 | 1.5191E-07 | 0.80 | 0 | 1  | 0 | 0 | 0 |
| rs2063010   | rs3105593 | INDEX | 27 USP50-TRPM7 | -          | 0.81 | 0 | 0  | 0 | 0 | 0 |
| rs2115671   | rs3105593 | INDEX | 27 USP50-TRPM7 | 0.00001953 | 0.81 | 0 | 0  | 0 | 0 | 0 |
| rs2292174   | rs3105593 | INDEX | 27 USP50-TRPM7 | 1.0258E-07 | 0.81 | 0 | 0  | 0 | 0 | 0 |
| rs2414059   | rs3105593 | INDEX | 27 USP50-TRPM7 | 7.6888E-11 | 0.97 | 0 | 0  | 0 | 0 | 0 |
| rs2414060   | rs3105593 | INDEX | 27 USP50-TRPM7 | 1.557E-07  | 0.84 | 0 | 0  | 0 | 0 | 0 |
| rs2414072   | rs3105593 | INDEX | 27 USP50-TRPM7 | -          | 0.97 | 0 | 1  | 0 | 0 | 0 |
| rs2414073   | rs3105593 | INDEX | 27 USP50-TRPM7 | -          | 0.97 | 0 | 1  | 0 | 0 | 0 |
| rs2630      | rs3105593 | INDEX | 27 USP50-TRPM7 | 3.1586E-07 | 0.86 | 0 | 12 | 0 | 0 | 0 |
| rs28718130  | rs3105593 | INDEX | 27 USP50-TRPM7 | -          | 0.80 | 0 | 0  | 0 | 0 | 0 |
| rs2899462   | rs3105593 | INDEX | 27 USP50-TRPM7 | -          | 0.81 | 0 | 0  | 0 | 0 | 0 |
| rs3098200   | rs3105593 | INDEX | 27 USP50-TRPM7 | -          | 0.89 | 0 | 0  | 0 | 0 | 0 |
| rs3098202   | rs3105593 | INDEX | 27 USP50-TRPM7 | -          | 0.97 | 0 | 1  | 0 | 0 | 0 |
| rs3101850   | rs3105593 | INDEX | 27 USP50-TRPM7 | -          | 0.99 | 0 | 1  | 0 | 0 | 0 |
| rs3101852   | rs3105593 | INDEX | 27 USP50-TRPM7 | 2.7999E-07 | 0.86 | 0 | 0  | 0 | 0 | 0 |
| rs3101853   | rs3105593 | INDEX | 27 USP50-TRPM7 | 2.6142E-07 | 0.84 | 0 | 0  | 0 | 0 | 0 |
| rs3101854   | rs3105593 | INDEX | 27 USP50-TRPM7 | -          | 0.85 | 0 | 0  | 0 | 0 | 0 |
| rs3101855   | rs3105593 | INDEX | 27 USP50-TRPM7 | -          | 0.84 | 0 | 0  | 0 | 0 | 0 |
| rs3105590   | rs3105593 | INDEX | 27 USP50-TRPM7 | 2.2115E-07 | 0.84 | 0 | 1  | 0 | 0 | 0 |
| rs3105591   | rs3105593 | INDEX | 27 USP50-TRPM7 | 1.4558E-07 | 0.84 | 0 | 1  | 0 | 0 | 0 |
| rs3105592   | rs3105593 | INDEX | 27 USP50-TRPM7 | 6.8025E-12 | 0.94 | 0 | 1  | 0 | 0 | 0 |
| rs3105593   | rs3105593 | INDEX | 27 USP50-TRPM7 | 3.0585E-12 | 1.00 | 0 | 1  | 0 | 0 | 0 |
| rs3105598   | rs3105593 | INDEX | 27 USP50-TRPM7 | -          | 0.92 | 0 | 0  | 0 | 0 | 0 |
| rs3109878   | rs3105593 | INDEX | 27 USP50-TRPM7 | -          | 0.95 | 0 | 3  | 0 | 0 | 0 |
| rs3109879   | rs3105593 | INDEX | 27 USP50-TRPM7 | -          | 0.84 | 0 | 0  | 0 | 0 | 0 |
| rs3109880   | rs3105593 | INDEX | 27 USP50-TRPM7 | -          | 0.83 | 0 | 0  | 0 | 0 | 0 |
| rs3109881   | rs3105593 | INDEX | 27 USP50-TRPM7 | 3.1815E-07 | 0.84 | 0 | 5  | 0 | 0 | 0 |
| rs3109882   | rs3105593 | INDEX | 27 USP50-TRPM7 | -          | 0.97 | 0 | 1  | 0 | 0 | 0 |
| rs3109884   | rs3105593 | INDEX | 27 USP50-TRPM7 | -          | 0.84 | 0 | 0  | 0 | 0 | 0 |
| rs3109888   | rs3105593 | INDEX | 27 USP50-TRPM7 | 2.5944E-07 | 0.84 | 0 | 0  | 0 | 0 | 0 |
| rs3109891   | rs3105593 | INDEX | 27 USP50-TRPM7 | 1.9845E-07 | 0.84 | 0 | 0  | 0 | 0 | 0 |
| rs3109892   | rs3105593 | INDEX | 27 USP50-TRPM7 | 1.5695E-07 | 0.83 | 0 | 0  | 0 | 0 | 0 |
| rs3109894   | rs3105593 | INDEX | 27 USP50-TRPM7 | 1.9335E-07 | 0.84 | 0 | 0  | 0 | 0 | 0 |
| rs3109895   | rs3105593 | INDEX | 27 USP50-TRPM7 | 1.5492E-07 | 0.84 | 0 | 0  | 0 | 0 | 0 |
| rs3131573   | rs3105593 | INDEX | 27 USP50-TRPM7 | -          | 0.84 | 0 | 1  | 0 | 0 | 0 |
| rs3131576   | rs3105593 | INDEX | 27 USP50-TRPM7 | 4.4052E-12 | 0.97 | 0 | 1  | 0 | 0 | 0 |
| rs3131577   | rs3105593 | INDEX | 27 USP50-TRPM7 | 4.4293E-07 | 0.84 | 0 | 1  | 0 | 0 | 0 |
| rs3131578   | rs3105593 | INDEX | 27 USP50-TRPM7 | 2.8107E-07 | 0.84 | 0 | 1  | 0 | 0 | 0 |
| rs3131580   | rs3105593 | INDEX | 27 USP50-TRPM7 | 2.5611E-07 | 0.86 | 0 | 0  | 0 | 0 | 0 |
| rs3131581   | rs3105593 | INDEX | 27 USP50-TRPM7 | -          | 0.85 | 0 | 0  | 0 | 0 | 0 |
| rs3131582   | rs3105593 | INDEX | 27 USP50-TRPM7 | -          | 0.83 | 0 | 0  | 0 | 0 | 0 |

|             |            |             |                |            |      |   |    |   |   |   |
|-------------|------------|-------------|----------------|------------|------|---|----|---|---|---|
| rs3131584   | rs3105593  | INDEX       | 27 USP50-TRPM7 | 0.80315    | 0.86 | 0 | 0  | 0 | 0 | 0 |
| rs3131585   | rs3105593  | INDEX       | 27 USP50-TRPM7 | -          | 0.86 | 0 | 0  | 0 | 0 | 0 |
| rs3131586   | rs3105593  | INDEX       | 27 USP50-TRPM7 | -          | 0.81 | 0 | 1  | 0 | 0 | 0 |
| rs3131587   | rs3105593  | INDEX       | 27 USP50-TRPM7 | 2.2267E-07 | 0.86 | 0 | 1  | 0 | 0 | 0 |
| rs3131588   | rs3105593  | INDEX       | 27 USP50-TRPM7 | 0.50387    | 0.99 | 0 | 0  | 0 | 0 | 0 |
| rs3131589   | rs3105593  | INDEX       | 27 USP50-TRPM7 | -          | 0.84 | 0 | 0  | 0 | 0 | 0 |
| rs3131590   | rs3105593  | INDEX       | 27 USP50-TRPM7 | -          | 0.84 | 0 | 0  | 0 | 0 | 0 |
| rs3131595   | rs3105593  | INDEX       | 27 USP50-TRPM7 | -          | 0.97 | 0 | 0  | 0 | 0 | 0 |
| rs3131596   | rs3105593  | INDEX       | 27 USP50-TRPM7 | -          | 0.84 | 0 | 0  | 0 | 0 | 0 |
| rs3131597   | rs3105593  | INDEX       | 27 USP50-TRPM7 | 5.9233E-12 | 0.93 | 0 | 0  | 0 | 0 | 0 |
| rs3131598   | rs3105593  | INDEX       | 27 USP50-TRPM7 | -          | 0.92 | 0 | 0  | 0 | 0 | 0 |
| rs3131599   | rs3105593  | INDEX       | 27 USP50-TRPM7 | -          | 0.85 | 0 | 0  | 0 | 0 | 0 |
| rs3131600   | rs3105593  | INDEX       | 27 USP50-TRPM7 | -          | 0.85 | 0 | 0  | 0 | 0 | 0 |
| rs3131601   | rs3105593  | INDEX       | 27 USP50-TRPM7 | -          | 0.97 | 0 | 0  | 0 | 0 | 0 |
| rs34386878  | rs3105593  | INDEX       | 27 USP50-TRPM7 | -          | 0.81 | 0 | 0  | 0 | 0 | 0 |
| rs3848129   | rs3105593  | INDEX       | 27 USP50-TRPM7 | 1.9869E-07 | 0.81 | 0 | 0  | 0 | 0 | 0 |
| rs3848130   | rs3105593  | INDEX       | 27 USP50-TRPM7 | 1.392E-07  | 0.81 | 0 | 0  | 0 | 0 | 0 |
| rs4509958   | rs3105593  | INDEX       | 27 USP50-TRPM7 | -          | 0.80 | 0 | 0  | 0 | 0 | 0 |
| rs4775893   | rs3105593  | INDEX       | 27 USP50-TRPM7 | -          | 0.81 | 0 | 0  | 0 | 0 | 0 |
| rs4775894   | rs3105593  | INDEX       | 27 USP50-TRPM7 | 8.0227E-12 | 0.93 | 0 | 0  | 0 | 0 | 0 |
| rs4775897   | rs3105593  | INDEX       | 27 USP50-TRPM7 | -          | 0.81 | 0 | 0  | 0 | 0 | 0 |
| rs56015830  | rs3105593  | INDEX       | 27 USP50-TRPM7 | -          | 0.81 | 0 | 0  | 0 | 0 | 0 |
| rs56069965  | rs3105593  | INDEX       | 27 USP50-TRPM7 | -          | 0.81 | 0 | 1  | 0 | 0 | 0 |
| rs56080544  | rs3105593  | INDEX       | 27 USP50-TRPM7 | -          | 0.82 | 0 | 0  | 0 | 0 | 0 |
| rs56118429  | rs3105593  | INDEX       | 27 USP50-TRPM7 | -          | 0.80 | 0 | 0  | 0 | 0 | 0 |
| rs56944208  | rs3105593  | INDEX       | 27 USP50-TRPM7 | -          | 0.81 | 0 | 0  | 0 | 0 | 0 |
| rs57002197  | rs3105593  | INDEX       | 27 USP50-TRPM7 | -          | 0.84 | 0 | 0  | 0 | 0 | 0 |
| rs62017189  | rs3105593  | INDEX       | 27 USP50-TRPM7 | -          | 0.81 | 0 | 0  | 0 | 0 | 0 |
| rs62017197  | rs3105593  | INDEX       | 27 USP50-TRPM7 | -          | 0.81 | 0 | 0  | 0 | 0 | 0 |
| rs62017203  | rs3105593  | INDEX       | 27 USP50-TRPM7 | -          | 0.81 | 0 | 0  | 0 | 0 | 0 |
| rs62017204  | rs3105593  | INDEX       | 27 USP50-TRPM7 | -          | 0.81 | 0 | 0  | 0 | 0 | 0 |
| rs62017206  | rs3105593  | INDEX       | 27 USP50-TRPM7 | -          | 0.81 | 0 | 0  | 0 | 0 | 0 |
| rs62017210  | rs3105593  | INDEX       | 27 USP50-TRPM7 | -          | 0.81 | 0 | 0  | 0 | 0 | 0 |
| rs62017243  | rs3105593  | INDEX       | 27 USP50-TRPM7 | -          | 0.81 | 1 | 27 | 0 | 0 | 1 |
| rs7167138   | rs3105593  | INDEX       | 27 USP50-TRPM7 | -          | 0.80 | 0 | 0  | 0 | 0 | 0 |
| rs7174839   | rs3105593  | INDEX       | 27 USP50-TRPM7 | 4.1431E-12 | 0.94 | 0 | 0  | 0 | 0 | 0 |
| rs7176874   | rs3105593  | INDEX       | 27 USP50-TRPM7 | -          | 0.93 | 0 | 0  | 0 | 0 | 0 |
| rs72527399  | rs3105593  | INDEX       | 27 USP50-TRPM7 | -          | 0.82 | 0 | 0  | 0 | 0 | 0 |
| rs74334968  | rs3105593  | INDEX       | 27 USP50-TRPM7 | -          | 0.81 | 0 | 0  | 0 | 0 | 0 |
| rs74728887  | rs3105593  | INDEX       | 27 USP50-TRPM7 | -          | 0.81 | 0 | 0  | 0 | 0 | 0 |
| rs76365099  | rs3105593  | INDEX       | 27 USP50-TRPM7 | -          | 0.80 | 0 | 0  | 0 | 0 | 0 |
| rs8023644   | rs3105593  | INDEX       | 27 USP50-TRPM7 | 6.1394E-07 | 0.81 | 0 | 0  | 0 | 0 | 0 |
| rs8029073   | rs3105593  | INDEX       | 27 USP50-TRPM7 | -          | 0.80 | 0 | 0  | 0 | 0 | 0 |
| rs8033256   | rs3105593  | INDEX       | 27 USP50-TRPM7 | -          | 0.80 | 1 | 0  | 0 | 0 | 0 |
| rs8036588   | rs3105593  | INDEX       | 27 USP50-TRPM7 | -          | 0.81 | 0 | 0  | 0 | 0 | 0 |
| rs874665    | rs3105593  | INDEX       | 27 USP50-TRPM7 | 4.5285E-12 | 0.97 | 0 | 0  | 0 | 0 | 0 |
| rs934624    | rs3105593  | INDEX       | 27 USP50-TRPM7 | -          | 0.81 | 0 | 20 | 0 | 0 | 0 |
| rs934625    | rs3105593  | INDEX       | 27 USP50-TRPM7 | -          | 0.81 | 0 | 15 | 0 | 0 | 0 |
| rs1296720   | rs1296720  | INDEX       | 28 CREBBP      | 3.5687E-10 | 1.00 | 1 | 91 | 1 | 1 | 1 |
| rs12443744  | rs12930096 | OTHERSIGNAL | 29 LITAF       | -          | 0.99 | 0 | 38 | 0 | 0 | 0 |
| rs12444261  | rs12444261 | OTHERSIGNAL | 29 LITAF       | 2.1438E-12 | 1.00 | 1 | 86 | 1 | 1 | 1 |
| rs12444280  | rs12930096 | OTHERSIGNAL | 29 LITAF       | 0.66356    | 1.00 | 0 | 15 | 0 | 0 | 1 |
| rs12444633  | rs12930096 | OTHERSIGNAL | 29 LITAF       | 2.7487E-13 | 0.98 | 0 | 30 | 0 | 0 | 0 |
| rs12444653  | rs12930096 | OTHERSIGNAL | 29 LITAF       | -          | 0.99 | 0 | 30 | 0 | 0 | 0 |
| rs12445222  | rs12930096 | OTHERSIGNAL | 29 LITAF       | 0.60034    | 0.99 | 0 | 35 | 0 | 0 | 0 |
| rs12445902  | rs12930096 | OTHERSIGNAL | 29 LITAF       | -          | 0.83 | 0 | 21 | 0 | 0 | 0 |
| rs12446514  | rs12930096 | OTHERSIGNAL | 29 LITAF       | 0.65295    | 0.99 | 0 | 21 | 0 | 0 | 0 |
| rs12446567  | rs12930096 | OTHERSIGNAL | 29 LITAF       | 0.65295    | 0.99 | 0 | 23 | 0 | 0 | 0 |
| rs12446730  | rs12444261 | OTHERSIGNAL | 29 LITAF       | 4.7041E-12 | 0.82 | 0 | 0  | 0 | 0 | 0 |
| rs12447508  | rs12930096 | OTHERSIGNAL | 29 LITAF       | -          | 0.94 | 0 | 11 | 0 | 0 | 1 |
| rs12447546  | rs12930096 | OTHERSIGNAL | 29 LITAF       | 0.66356    | 0.91 | 0 | 5  | 0 | 0 | 0 |
| rs12447658  | rs12930096 | OTHERSIGNAL | 29 LITAF       | -          | 0.94 | 0 | 11 | 0 | 0 | 1 |
| rs12447714  | rs12930096 | OTHERSIGNAL | 29 LITAF       | -          | 0.93 | 0 | 5  | 0 | 0 | 0 |
| rs12448294  | rs12930096 | OTHERSIGNAL | 29 LITAF       | -          | 0.99 | 0 | 46 | 0 | 0 | 0 |
| rs12448494  | rs12930096 | OTHERSIGNAL | 29 LITAF       | 0.64063    | 0.83 | 0 | 21 | 0 | 0 | 0 |
| rs12917676  | rs12930096 | OTHERSIGNAL | 29 LITAF       | -          | 0.93 | 0 | 0  | 0 | 0 | 0 |
| rs12921437  | rs12930096 | OTHERSIGNAL | 29 LITAF       | 0.59059    | 0.92 | 0 | 0  | 0 | 0 | 0 |
| rs12927050  | rs12930096 | OTHERSIGNAL | 29 LITAF       | 1.1715E-13 | 0.98 | 0 | 9  | 0 | 0 | 0 |
| rs12927097  | rs12930096 | OTHERSIGNAL | 29 LITAF       | 0.66896    | 0.99 | 0 | 9  | 0 | 0 | 0 |
| rs12929430  | rs12930096 | OTHERSIGNAL | 29 LITAF       | 9.6318E-13 | 0.98 | 1 | 6  | 0 | 0 | 0 |
| rs12930096  | rs12930096 | OTHERSIGNAL | 29 LITAF       | 2.9187E-13 | 1.00 | 1 | 44 | 0 | 0 | 0 |
| rs1814273   | rs12444261 | OTHERSIGNAL | 29 LITAF       | -          | 0.96 | 0 | 0  | 0 | 0 | 0 |
| rs202166128 | rs12444261 | OTHERSIGNAL | 29 LITAF       | -          | 0.99 | 0 | 7  | 0 | 0 | 0 |
| rs2080512   | rs735951   | INDEX       | 29 LITAF       | -          | 0.97 | 0 | 42 | 0 | 0 | 1 |
| rs28439748  | rs12930096 | OTHERSIGNAL | 29 LITAF       | 0.66356    | 1.00 | 0 | 16 | 0 | 0 | 1 |
| rs34096091  | rs12930096 | OTHERSIGNAL | 29 LITAF       | -          | 0.97 | 0 | 45 | 0 | 0 | 0 |
| rs35592815  | rs12930096 | OTHERSIGNAL | 29 LITAF       | 0.60034    | 0.99 | 1 | 44 | 0 | 0 | 0 |
| rs35901585  | rs12930096 | OTHERSIGNAL | 29 LITAF       | 0.67084    | 0.99 | 0 | 33 | 0 | 0 | 0 |
| rs36020240  | rs12930096 | OTHERSIGNAL | 29 LITAF       | 0.64688    | 0.99 | 0 | 21 | 0 | 0 | 0 |
| rs4510029   | rs12444261 | OTHERSIGNAL | 29 LITAF       | 3.4858E-12 | 0.98 | 0 | 0  | 0 | 0 | 0 |
| rs55693174  | rs12444261 | OTHERSIGNAL | 29 LITAF       | -          | 0.96 | 0 | 0  | 0 | 0 | 0 |
| rs55947021  | rs12930096 | OTHERSIGNAL | 29 LITAF       | -          | 0.98 | 0 | 19 | 0 | 0 | 0 |
| rs56021873  | rs12444261 | OTHERSIGNAL | 29 LITAF       | -          | 0.81 | 0 | 0  | 0 | 0 | 0 |
| rs57439922  | rs12444261 | OTHERSIGNAL | 29 LITAF       | -          | 0.89 | 0 | 0  | 0 | 0 | 0 |
| rs59642881  | rs12930096 | OTHERSIGNAL | 29 LITAF       | -          | 0.86 | 0 | 23 | 0 | 0 | 0 |
| rs60493856  | rs12444261 | OTHERSIGNAL | 29 LITAF       | -          | 0.89 | 0 | 0  | 0 | 0 | 0 |
| rs61541101  | rs12444261 | OTHERSIGNAL | 29 LITAF       | -          | 0.98 | 0 | 0  | 0 | 0 | 0 |
| rs67188060  | rs12930096 | OTHERSIGNAL | 29 LITAF       | -          | 0.98 | 1 | 6  | 0 | 0 | 0 |
| rs67188401  | rs12444261 | OTHERSIGNAL | 29 LITAF       | -          | 0.86 | 0 | 4  | 0 | 0 | 0 |
| rs67445581  | rs12444261 | OTHERSIGNAL | 29 LITAF       | -          | 0.98 | 0 | 0  | 0 | 0 | 0 |
| rs67850232  | rs12444261 | OTHERSIGNAL | 29 LITAF       | -          | 0.95 | 0 | 0  | 0 | 0 | 0 |
| rs67918820  | rs12444261 | OTHERSIGNAL | 29 LITAF       | -          | 0.98 | 0 | 0  | 0 | 0 | 0 |

|             |            |             |          |            |      |   |    |   |   |   |
|-------------|------------|-------------|----------|------------|------|---|----|---|---|---|
| rs71388711  | rs12930096 | OTHERSIGNAL | 29 LITAF | -          | 0.87 | 0 | 0  | 0 | 0 | 0 |
| rs7187498   | rs735951   | INDEX       | 29 LITAF | -          | 0.93 | 0 | 5  | 0 | 0 | 0 |
| rs7191330   | rs735951   | INDEX       | 29 LITAF | 0.65053    | 0.97 | 0 | 13 | 0 | 0 | 0 |
| rs7195296   | rs12444261 | OTHERSIGNAL | 29 LITAF | 9.62E-12   | 0.83 | 0 | 3  | 0 | 0 | 0 |
| rs72779183  | rs12930096 | OTHERSIGNAL | 29 LITAF | -          | 0.99 | 0 | 33 | 0 | 0 | 0 |
| rs72781065  | rs12444261 | OTHERSIGNAL | 29 LITAF | -          | 0.90 | 0 | 17 | 0 | 0 | 0 |
| rs72781086  | rs12444261 | OTHERSIGNAL | 29 LITAF | -          | 0.81 | 1 | 31 | 0 | 0 | 0 |
| rs735951    | rs735951   | INDEX       | 29 LITAF | 2.29E-28   | 1.00 | 0 | 11 | 0 | 0 | 0 |
| rs8048558   | rs12930096 | OTHERSIGNAL | 29 LITAF | 0.42749    | 0.99 | 0 | 21 | 0 | 0 | 0 |
| rs8049607   | rs735951   | INDEX       | 29 LITAF | 3.40E-28   | 0.85 | 0 | 62 | 0 | 0 | 1 |
| rs8050192   | rs12930096 | OTHERSIGNAL | 29 LITAF | -          | 0.99 | 1 | 16 | 0 | 0 | 0 |
| rs8050461   | rs12930096 | OTHERSIGNAL | 29 LITAF | 5.4085E-15 | 0.98 | 0 | 9  | 0 | 0 | 0 |
| rs8050641   | rs12930096 | OTHERSIGNAL | 29 LITAF | -          | 0.98 | 0 | 9  | 0 | 0 | 0 |
| rs8052020   | rs12930096 | OTHERSIGNAL | 29 LITAF | 0.65295    | 0.99 | 0 | 14 | 0 | 0 | 0 |
| rs8052255   | rs12930096 | OTHERSIGNAL | 29 LITAF | -          | 0.98 | 0 | 9  | 0 | 0 | 0 |
| rs8052262   | rs12930096 | OTHERSIGNAL | 29 LITAF | -          | 0.98 | 0 | 9  | 0 | 0 | 0 |
| rs8052803   | rs12930096 | OTHERSIGNAL | 29 LITAF | 0.65295    | 0.99 | 0 | 14 | 0 | 0 | 0 |
| rs8056062   | rs12930096 | OTHERSIGNAL | 29 LITAF | -          | 0.99 | 0 | 17 | 0 | 0 | 0 |
| rs8063949   | rs12444261 | OTHERSIGNAL | 29 LITAF | 3.1273E-11 | 0.99 | 0 | 15 | 0 | 0 | 0 |
| rs9929603   | rs12930096 | OTHERSIGNAL | 29 LITAF | 0.66356    | 1.00 | 0 | 39 | 0 | 0 | 0 |
| rs9930359   | rs12444261 | OTHERSIGNAL | 29 LITAF | -          | 0.81 | 0 | 1  | 0 | 0 | 0 |
| rs1659127   | rs246185   | INDEX       | 30 MKL2  | 6.38E-11   | 0.87 | 0 | 1  | 0 | 0 | 0 |
| rs1704528   | rs246185   | INDEX       | 30 MKL2  | -          | 0.88 | 0 | 0  | 0 | 0 | 0 |
| rs1704529   | rs246185   | INDEX       | 30 MKL2  | -          | 0.87 | 0 | 0  | 0 | 0 | 0 |
| rs181766    | rs246185   | INDEX       | 30 MKL2  | -          | 1.00 | 0 | 32 | 0 | 0 | 0 |
| rs193536    | rs246185   | INDEX       | 30 MKL2  | -          | 0.98 | 0 | 32 | 0 | 0 | 0 |
| rs246180    | rs246185   | INDEX       | 30 MKL2  | -          | 0.93 | 0 | 0  | 0 | 0 | 0 |
| rs246185    | rs246185   | INDEX       | 30 MKL2  | 2.6393E-13 | 1.00 | 0 | 5  | 1 | 0 | 0 |
| rs30152     | rs246185   | INDEX       | 30 MKL2  | -          | 0.81 | 0 | 0  | 0 | 0 | 0 |
| rs30153     | rs246185   | INDEX       | 30 MKL2  | -          | 0.81 | 0 | 0  | 0 | 0 | 0 |
| rs10719000  | rs4784934  | OTHERSIGNAL | 31 CNOT1 | -          | 0.82 | 1 | 13 | 0 | 1 | 1 |
| rs11364517  | rs246196   | INDEX       | 31 CNOT1 | -          | 0.91 | 0 | 4  | 0 | 0 | 0 |
| rs11859781  | rs246196   | INDEX       | 31 CNOT1 | 0.049714   | 0.81 | 0 | 0  | 0 | 0 | 0 |
| rs11860728  | rs246196   | INDEX       | 31 CNOT1 | -          | 0.86 | 0 | 0  | 0 | 0 | 0 |
| rs11862156  | rs246196   | INDEX       | 31 CNOT1 | 0.022633   | 0.98 | 0 | 0  | 0 | 0 | 0 |
| rs12102473  | rs246196   | INDEX       | 31 CNOT1 | 0.048234   | 0.85 | 0 | 0  | 0 | 0 | 0 |
| rs12149484  | rs246196   | INDEX       | 31 CNOT1 | 0.024903   | 0.91 | 0 | 4  | 0 | 0 | 0 |
| rs12149850  | rs246196   | INDEX       | 31 CNOT1 | -          | 0.96 | 0 | 0  | 0 | 0 | 0 |
| rs12232402  | rs246196   | INDEX       | 31 CNOT1 | -          | 0.93 | 0 | 5  | 0 | 0 | 0 |
| rs12232436  | rs246196   | INDEX       | 31 CNOT1 | 0.031186   | 0.93 | 0 | 4  | 0 | 0 | 0 |
| rs12445577  | rs246196   | INDEX       | 31 CNOT1 | 0.014925   | 0.88 | 0 | 0  | 0 | 0 | 0 |
| rs12446307  | rs246196   | INDEX       | 31 CNOT1 | 3.44E-56   | 0.93 | 0 | 0  | 0 | 0 | 0 |
| rs12597246  | rs246196   | INDEX       | 31 CNOT1 | -          | 0.93 | 0 | 0  | 0 | 0 | 0 |
| rs12925702  | rs246196   | INDEX       | 31 CNOT1 | 6.46E-51   | 0.93 | 0 | 0  | 0 | 0 | 0 |
| rs13339147  | rs246196   | INDEX       | 31 CNOT1 | -          | 0.85 | 0 | 1  | 0 | 0 | 0 |
| rs1424077   | rs4784934  | OTHERSIGNAL | 31 CNOT1 | 3.0326E-08 | 0.98 | 1 | 5  | 0 | 0 | 0 |
| rs151812    | rs246196   | INDEX       | 31 CNOT1 | -          | 0.90 | 0 | 0  | 0 | 0 | 0 |
| rs151814    | rs246196   | INDEX       | 31 CNOT1 | -          | 0.93 | 0 | 10 | 0 | 0 | 0 |
| rs151816    | rs246196   | INDEX       | 31 CNOT1 | -          | 0.86 | 0 | 1  | 0 | 0 | 0 |
| rs154431    | rs246196   | INDEX       | 31 CNOT1 | -          | 0.93 | 0 | 41 | 1 | 0 | 0 |
| rs154434    | rs246196   | INDEX       | 31 CNOT1 | 0.068956   | 0.93 | 0 | 0  | 0 | 0 | 0 |
| rs1549607   | rs246196   | INDEX       | 31 CNOT1 | 2.16E-57   | 0.98 | 0 | 0  | 0 | 0 | 0 |
| rs1646010   | rs246196   | INDEX       | 31 CNOT1 | 0.020653   | 1.00 | 0 | 0  | 0 | 0 | 0 |
| rs173475    | rs246196   | INDEX       | 31 CNOT1 | 0.02001    | 1.00 | 0 | 0  | 0 | 0 | 0 |
| rs181951    | rs246196   | INDEX       | 31 CNOT1 | 0.050527   | 0.93 | 0 | 0  | 0 | 0 | 0 |
| rs1895522   | rs4784934  | OTHERSIGNAL | 31 CNOT1 | 1.6808E-07 | 0.85 | 1 | 9  | 0 | 0 | 0 |
| rs1971073   | rs246196   | INDEX       | 31 CNOT1 | 0.026818   | 0.93 | 0 | 1  | 0 | 0 | 0 |
| rs1981960   | rs246196   | INDEX       | 31 CNOT1 | 0.036239   | 0.98 | 0 | 6  | 0 | 0 | 0 |
| rs1981961   | rs246196   | INDEX       | 31 CNOT1 | 0.023108   | 0.98 | 0 | 6  | 0 | 0 | 0 |
| rs199630654 | rs246196   | INDEX       | 31 CNOT1 | -          | 0.90 | 0 | 1  | 0 | 0 | 0 |
| rs2015185   | rs246196   | INDEX       | 31 CNOT1 | -          | 0.93 | 0 | 0  | 0 | 0 | 0 |
| rs2042401   | rs4784934  | OTHERSIGNAL | 31 CNOT1 | 3.6835E-08 | 0.97 | 1 | 0  | 0 | 0 | 0 |
| rs2067207   | rs246196   | INDEX       | 31 CNOT1 | -          | 0.97 | 0 | 0  | 0 | 0 | 0 |
| rs2067270   | rs246196   | INDEX       | 31 CNOT1 | -          | 0.97 | 0 | 0  | 0 | 0 | 0 |
| rs2090727   | rs246196   | INDEX       | 31 CNOT1 | 5.64E-57   | 0.97 | 0 | 0  | 0 | 0 | 0 |
| rs2243463   | rs246196   | INDEX       | 31 CNOT1 | 0.015381   | 1.00 | 0 | 0  | 0 | 0 | 0 |
| rs2405860   | rs246196   | INDEX       | 31 CNOT1 | 0.026818   | 0.93 | 0 | 0  | 0 | 0 | 0 |
| rs244915    | rs246196   | INDEX       | 31 CNOT1 | 1.17E-52   | 0.88 | 0 | 0  | 0 | 0 | 0 |
| rs246194    | rs246196   | INDEX       | 31 CNOT1 | 0.013972   | 1.00 | 0 | 0  | 0 | 0 | 0 |
| rs246196    | rs246196   | INDEX       | 31 CNOT1 | 2.03E-57   | 1.00 | 0 | 0  | 0 | 0 | 0 |
| rs246258    | rs246196   | INDEX       | 31 CNOT1 | 2.33E-57   | 1.00 | 0 | 0  | 0 | 0 | 0 |
| rs27097     | rs246196   | INDEX       | 31 CNOT1 | 2.65E-53   | 0.91 | 0 | 0  | 0 | 0 | 0 |
| rs28307     | rs246196   | INDEX       | 31 CNOT1 | 0.015381   | 1.00 | 0 | 0  | 0 | 0 | 0 |
| rs28479997  | rs246196   | INDEX       | 31 CNOT1 | -          | 0.97 | 0 | 0  | 0 | 0 | 0 |
| rs28627526  | rs4784934  | OTHERSIGNAL | 31 CNOT1 | 0.40965    | 0.83 | 1 | 11 | 0 | 1 | 1 |
| rs28667004  | rs246196   | INDEX       | 31 CNOT1 | -          | 0.93 | 0 | 0  | 0 | 0 | 0 |
| rs2897253   | rs246196   | INDEX       | 31 CNOT1 | 0.025812   | 0.93 | 0 | 0  | 0 | 0 | 0 |
| rs34716647  | rs246196   | INDEX       | 31 CNOT1 | -          | 0.91 | 0 | 0  | 0 | 0 | 0 |
| rs35239829  | rs246196   | INDEX       | 31 CNOT1 | -          | 0.97 | 0 | 0  | 0 | 0 | 0 |
| rs37034     | rs246196   | INDEX       | 31 CNOT1 | 0.015806   | 1.00 | 0 | 0  | 0 | 0 | 0 |
| rs37036     | rs246196   | INDEX       | 31 CNOT1 | 2.36E-52   | 1.00 | 0 | 0  | 0 | 0 | 0 |
| rs37039     | rs246196   | INDEX       | 31 CNOT1 | 0.015381   | 1.00 | 0 | 0  | 0 | 0 | 0 |
| rs37040     | rs246196   | INDEX       | 31 CNOT1 | -          | 1.00 | 0 | 0  | 0 | 0 | 0 |
| rs37041     | rs246196   | INDEX       | 31 CNOT1 | -          | 1.00 | 0 | 0  | 0 | 0 | 0 |
| rs37051     | rs246196   | INDEX       | 31 CNOT1 | 0.015381   | 1.00 | 0 | 0  | 0 | 0 | 0 |
| rs37053     | rs246196   | INDEX       | 31 CNOT1 | 2.09E-57   | 1.00 | 0 | 0  | 0 | 0 | 0 |
| rs37054     | rs246196   | INDEX       | 31 CNOT1 | 5.47E-53   | 1.00 | 0 | 0  | 0 | 0 | 0 |
| rs37055     | rs246196   | INDEX       | 31 CNOT1 | 2.20E-57   | 0.98 | 0 | 0  | 0 | 0 | 0 |
| rs37056     | rs246196   | INDEX       | 31 CNOT1 | -          | 0.96 | 0 | 0  | 0 | 0 | 0 |
| rs37057     | rs246196   | INDEX       | 31 CNOT1 | 0.015381   | 0.97 | 0 | 1  | 0 | 0 | 0 |
| rs37060     | rs246196   | INDEX       | 31 CNOT1 | 2.89E-57   | 0.97 | 0 | 0  | 0 | 0 | 0 |
| rs37061     | rs246196   | INDEX       | 31 CNOT1 | -          | 0.97 | 0 | 0  | 0 | 0 | 0 |

|            |           |             |          |            |      |   |    |   |   |   |
|------------|-----------|-------------|----------|------------|------|---|----|---|---|---|
| rs37062    | rs246196  | INDEX       | 31 CNOT1 | 1.88E-55   | 0.95 | 0 | 0  | 0 | 0 | 0 |
| rs37063    | rs246196  | INDEX       | 31 CNOT1 | -          | 0.95 | 0 | 0  | 0 | 0 | 0 |
| rs37064    | rs246196  | INDEX       | 31 CNOT1 | -          | 0.96 | 0 | 0  | 0 | 0 | 0 |
| rs40187    | rs246196  | INDEX       | 31 CNOT1 | -          | 1.00 | 0 | 0  | 0 | 0 | 0 |
| rs40188    | rs246196  | INDEX       | 31 CNOT1 | 0.015381   | 0.97 | 0 | 0  | 0 | 0 | 0 |
| rs42947    | rs246196  | INDEX       | 31 CNOT1 | 0.03485    | 1.00 | 0 | 0  | 0 | 0 | 0 |
| rs4471670  | rs246196  | INDEX       | 31 CNOT1 | -          | 0.97 | 0 | 0  | 0 | 0 | 0 |
| rs4485352  | rs246196  | INDEX       | 31 CNOT1 | 5.26E-57   | 0.96 | 0 | 0  | 0 | 0 | 0 |
| rs4496133  | rs246196  | INDEX       | 31 CNOT1 | -          | 0.93 | 0 | 5  | 0 | 0 | 0 |
| rs4784051  | rs246196  | INDEX       | 31 CNOT1 | 7.22E-56   | 0.93 | 0 | 46 | 1 | 1 | 0 |
| rs4784052  | rs246196  | INDEX       | 31 CNOT1 | -          | 0.92 | 0 | 3  | 0 | 0 | 0 |
| rs4784934  | rs4784934 | OTHERSIGNAL | 31 CNOT1 | 5.5462E-09 | 1.00 | 1 | 24 | 1 | 0 | 1 |
| rs4784935  | rs4784934 | OTHERSIGNAL | 31 CNOT1 | 0.50463    | 1.00 | 1 | 25 | 1 | 0 | 0 |
| rs4784938  | rs4784934 | OTHERSIGNAL | 31 CNOT1 | 6.2376E-08 | 0.91 | 1 | 13 | 0 | 1 | 1 |
| rs4784956  | rs246196  | INDEX       | 31 CNOT1 | 0.08443    | 0.96 | 0 | 0  | 0 | 0 | 0 |
| rs4784960  | rs246196  | INDEX       | 31 CNOT1 | 3.23E-56   | 0.93 | 0 | 0  | 0 | 0 | 0 |
| rs60415374 | rs4784934 | OTHERSIGNAL | 31 CNOT1 | -          | 0.90 | 0 | 0  | 0 | 0 | 1 |
| rs6499956  | rs4784934 | OTHERSIGNAL | 31 CNOT1 | -          | 0.85 | 0 | 1  | 0 | 0 | 0 |
| rs6499962  | rs246196  | INDEX       | 31 CNOT1 | 7.43E-57   | 0.97 | 0 | 1  | 0 | 0 | 0 |
| rs7186158  | rs4784934 | OTHERSIGNAL | 31 CNOT1 | 0.39566    | 0.81 | 0 | 0  | 1 | 0 | 0 |
| rs7186997  | rs246196  | INDEX       | 31 CNOT1 | 0.023108   | 0.97 | 0 | 0  | 0 | 0 | 0 |
| rs7188697  | rs246196  | INDEX       | 31 CNOT1 | 6.96E-53   | 0.87 | 0 | 0  | 0 | 0 | 0 |
| rs7189568  | rs246196  | INDEX       | 31 CNOT1 | 4.43E-56   | 0.93 | 0 | 0  | 0 | 0 | 0 |
| rs7190613  | rs246196  | INDEX       | 31 CNOT1 | -          | 0.93 | 1 | 7  | 0 | 0 | 0 |
| rs7196236  | rs246196  | INDEX       | 31 CNOT1 | -          | 0.91 | 0 | 1  | 0 | 0 | 0 |
| rs7197786  | rs246196  | INDEX       | 31 CNOT1 | 0.04391    | 0.92 | 0 | 0  | 0 | 0 | 0 |
| rs7198329  | rs246196  | INDEX       | 31 CNOT1 | -          | 0.93 | 0 | 0  | 0 | 0 | 0 |
| rs7199856  | rs246196  | INDEX       | 31 CNOT1 | 3.09E-57   | 0.99 | 0 | 0  | 0 | 0 | 0 |
| rs7203887  | rs246196  | INDEX       | 31 CNOT1 | 1.02E-55   | 0.93 | 0 | 2  | 0 | 0 | 0 |
| rs7205071  | rs246196  | INDEX       | 31 CNOT1 | 3.45E-52   | 0.93 | 0 | 16 | 0 | 0 | 0 |
| rs78143441 | rs246196  | INDEX       | 31 CNOT1 | -          | 0.85 | 0 | 0  | 0 | 0 | 0 |
| rs78202261 | rs246196  | INDEX       | 31 CNOT1 | -          | 0.93 | 0 | 0  | 0 | 0 | 0 |
| rs78512818 | rs246196  | INDEX       | 31 CNOT1 | -          | 0.93 | 0 | 0  | 0 | 0 | 0 |
| rs8043716  | rs246196  | INDEX       | 31 CNOT1 | -          | 0.92 | 0 | 0  | 0 | 0 | 0 |
| rs8043726  | rs246196  | INDEX       | 31 CNOT1 | -          | 0.88 | 0 | 0  | 0 | 0 | 0 |
| rs8047769  | rs246196  | INDEX       | 31 CNOT1 | -          | 0.99 | 0 | 0  | 0 | 0 | 0 |
| rs8049393  | rs246196  | INDEX       | 31 CNOT1 | 1.72E-56   | 0.93 | 0 | 0  | 0 | 0 | 0 |
| rs8051650  | rs246196  | INDEX       | 31 CNOT1 | 3.61E-56   | 0.93 | 0 | 1  | 0 | 0 | 0 |
| rs8053455  | rs246196  | INDEX       | 31 CNOT1 | -          | 0.99 | 0 | 0  | 0 | 0 | 0 |
| rs8056620  | rs246196  | INDEX       | 31 CNOT1 | 0.022051   | 0.89 | 0 | 0  | 0 | 0 | 0 |
| rs8061326  | rs246196  | INDEX       | 31 CNOT1 | 0.026818   | 0.93 | 0 | 1  | 0 | 0 | 0 |
| rs8062272  | rs246196  | INDEX       | 31 CNOT1 | -          | 0.91 | 0 | 2  | 0 | 0 | 0 |
| rs863433   | rs246196  | INDEX       | 31 CNOT1 | 1.58E-55   | 0.87 | 0 | 0  | 0 | 0 | 0 |
| rs9302700  | rs246196  | INDEX       | 31 CNOT1 | -          | 0.93 | 0 | 2  | 0 | 0 | 0 |
| rs9302701  | rs246196  | INDEX       | 31 CNOT1 | 0.040789   | 0.93 | 0 | 2  | 0 | 0 | 0 |
| rs950843   | rs246196  | INDEX       | 31 CNOT1 | 1.44E-52   | 0.93 | 0 | 0  | 0 | 0 | 0 |
| rs9921370  | rs246196  | INDEX       | 31 CNOT1 | -          | 0.97 | 0 | 0  | 0 | 0 | 0 |
| rs9923491  | rs246196  | INDEX       | 31 CNOT1 | 4.75E-57   | 0.97 | 0 | 0  | 0 | 0 | 0 |
| rs9924724  | rs246196  | INDEX       | 31 CNOT1 | 0.027646   | 0.84 | 0 | 0  | 0 | 0 | 0 |
| rs9924805  | rs246196  | INDEX       | 31 CNOT1 | -          | 0.97 | 0 | 0  | 0 | 0 | 0 |
| rs9926577  | rs246196  | INDEX       | 31 CNOT1 | 0.023108   | 0.97 | 0 | 0  | 0 | 0 | 0 |
| rs9927443  | rs246196  | INDEX       | 31 CNOT1 | 0.043394   | 0.93 | 0 | 0  | 0 | 0 | 0 |
| rs9928581  | rs4784934 | OTHERSIGNAL | 31 CNOT1 | -          | 0.99 | 0 | 7  | 1 | 0 | 0 |
| rs9931547  | rs4784934 | OTHERSIGNAL | 31 CNOT1 | 0.47119    | 0.97 | 1 | 6  | 0 | 1 | 1 |
| rs9932944  | rs246196  | INDEX       | 31 CNOT1 | 0.014442   | 0.97 | 0 | 0  | 0 | 0 | 0 |
| rs9935054  | rs246196  | INDEX       | 31 CNOT1 | 2.78E-56   | 0.93 | 0 | 0  | 0 | 0 | 0 |
| rs9941290  | rs246196  | INDEX       | 31 CNOT1 | 2.53E-54   | 0.92 | 0 | 0  | 0 | 0 | 0 |
| rs1003918  | rs1052536 | INDEX       | 32 LIG3  | 1.97E-24   | 0.99 | 0 | 0  | 0 | 0 | 0 |
| rs1052536  | rs1052536 | INDEX       | 32 LIG3  | 6.21E-25   | 1.00 | 0 | 0  | 0 | 0 | 0 |
| rs10853174 | rs1052536 | INDEX       | 32 LIG3  | 2.78E-22   | 0.96 | 0 | 9  | 0 | 0 | 0 |
| rs1088450  | rs1052536 | INDEX       | 32 LIG3  | -          | 0.89 | 0 | 25 | 0 | 0 | 0 |
| rs12945428 | rs1052536 | INDEX       | 32 LIG3  | -          | 0.88 | 0 | 0  | 0 | 0 | 0 |
| rs12948362 | rs1052536 | INDEX       | 32 LIG3  | 1.61E-24   | 0.99 | 0 | 0  | 0 | 0 | 0 |
| rs1634800  | rs1052536 | INDEX       | 32 LIG3  | 1.72E-24   | 0.93 | 0 | 24 | 0 | 0 | 0 |
| rs1634802  | rs1052536 | INDEX       | 32 LIG3  | -          | 0.93 | 0 | 9  | 0 | 0 | 0 |
| rs2074518  | rs1052536 | INDEX       | 32 LIG3  | 4.65E-24   | 0.99 | 1 | 15 | 1 | 1 | 1 |
| rs2339122  | rs1052536 | INDEX       | 32 LIG3  | 2.54E-24   | 0.93 | 0 | 16 | 0 | 0 | 0 |
| rs2339123  | rs1052536 | INDEX       | 32 LIG3  | -          | 0.93 | 0 | 7  | 0 | 0 | 0 |
| rs3135967  | rs1052536 | INDEX       | 32 LIG3  | 8.84E-24   | 0.94 | 0 | 0  | 0 | 0 | 0 |
| rs797989   | rs1052536 | INDEX       | 32 LIG3  | 1.22E-23   | 0.91 | 0 | 49 | 0 | 0 | 0 |
| rs797990   | rs1052536 | INDEX       | 32 LIG3  | -          | 0.91 | 0 | 53 | 0 | 0 | 0 |
| rs810042   | rs1052536 | INDEX       | 32 LIG3  | -          | 0.94 | 0 | 7  | 0 | 0 | 0 |
| rs978202   | rs1052536 | INDEX       | 32 LIG3  | -          | 0.81 | 0 | 3  | 0 | 0 | 0 |
| rs11079650 | rs9892651 | INDEX       | 33 PRKCA | -          | 0.96 | 0 | 10 | 0 | 0 | 0 |
| rs11658550 | rs9892651 | INDEX       | 33 PRKCA | -          | 0.97 | 0 | 4  | 0 | 0 | 0 |
| rs11658630 | rs9892651 | INDEX       | 33 PRKCA | -          | 0.97 | 0 | 4  | 0 | 0 | 0 |
| rs11867573 | rs9892651 | INDEX       | 33 PRKCA | -          | 0.97 | 0 | 7  | 0 | 0 | 0 |
| rs12601850 | rs9892651 | INDEX       | 33 PRKCA | 5.171E-11  | 0.83 | 0 | 36 | 0 | 0 | 0 |
| rs12938407 | rs9892651 | INDEX       | 33 PRKCA | -          | 0.80 | 0 | 14 | 0 | 0 | 0 |
| rs12940610 | rs9892651 | INDEX       | 33 PRKCA | 6.214E-14  | 0.97 | 0 | 2  | 0 | 0 | 0 |
| rs12944131 | rs9892651 | INDEX       | 33 PRKCA | -          | 0.83 | 0 | 10 | 0 | 0 | 0 |
| rs12945138 | rs9892651 | INDEX       | 33 PRKCA | -          | 0.80 | 0 | 8  | 0 | 0 | 0 |
| rs17633401 | rs9892651 | INDEX       | 33 PRKCA | 4.4716E-11 | 0.83 | 0 | 6  | 1 | 0 | 0 |
| rs17633437 | rs9892651 | INDEX       | 33 PRKCA | -          | 0.83 | 0 | 24 | 0 | 0 | 0 |
| rs17706845 | rs9892651 | INDEX       | 33 PRKCA | 8.873E-11  | 0.81 | 0 | 17 | 0 | 0 | 0 |
| rs35105653 | rs9892651 | INDEX       | 33 PRKCA | -          | 0.80 | 0 | 8  | 0 | 0 | 0 |
| rs35183571 | rs9892651 | INDEX       | 33 PRKCA | -          | 0.80 | 0 | 17 | 0 | 0 | 0 |
| rs35433169 | rs9892651 | INDEX       | 33 PRKCA | -          | 0.80 | 0 | 10 | 0 | 0 | 0 |
| rs35512343 | rs9892651 | INDEX       | 33 PRKCA | -          | 0.81 | 0 | 17 | 0 | 0 | 0 |
| rs35687884 | rs9892651 | INDEX       | 33 PRKCA | -          | 0.80 | 0 | 11 | 0 | 0 | 0 |
| rs4328478  | rs9892651 | INDEX       | 33 PRKCA | 4.8561E-14 | 0.96 | 0 | 11 | 0 | 0 | 0 |
| rs4335805  | rs9892651 | INDEX       | 33 PRKCA | -          | 0.96 | 0 | 10 | 0 | 0 | 0 |

|             |            |             |          |            |      |   |    |   |   |   |
|-------------|------------|-------------|----------|------------|------|---|----|---|---|---|
| rs4433842   | rs9892651  | INDEX       | 33 PRKCA | 3.8041E-11 | 0.80 | 0 | 12 | 0 | 0 | 0 |
| rs4577128   | rs9892651  | INDEX       | 33 PRKCA | 1.1262E-13 | 0.97 | 0 | 15 | 0 | 0 | 0 |
| rs67675584  | rs9892651  | INDEX       | 33 PRKCA | -          | 0.80 | 0 | 14 | 0 | 0 | 0 |
| rs67700546  | rs9892651  | INDEX       | 33 PRKCA | -          | 0.83 | 0 | 9  | 1 | 0 | 0 |
| rs67828405  | rs9892651  | INDEX       | 33 PRKCA | -          | 0.80 | 0 | 12 | 0 | 0 | 0 |
| rs7210446   | rs9892651  | INDEX       | 33 PRKCA | 7.5294E-14 | 0.99 | 0 | 15 | 0 | 0 | 0 |
| rs7406054   | rs9892651  | INDEX       | 33 PRKCA | -          | 0.95 | 0 | 2  | 0 | 0 | 0 |
| rs7406066   | rs9892651  | INDEX       | 33 PRKCA | -          | 0.96 | 0 | 2  | 0 | 0 | 0 |
| rs8071250   | rs9892651  | INDEX       | 33 PRKCA | -          | 0.96 | 0 | 8  | 0 | 0 | 0 |
| rs9303504   | rs9892651  | INDEX       | 33 PRKCA | 8.6568E-14 | 0.97 | 1 | 2  | 0 | 1 | 0 |
| rs9890911   | rs9892651  | INDEX       | 33 PRKCA | 8.5512E-14 | 0.97 | 0 | 1  | 0 | 0 | 0 |
| rs9892651   | rs9892651  | INDEX       | 33 PRKCA | 2.705E-14  | 1.00 | 0 | 8  | 0 | 0 | 0 |
| rs9893075   | rs9892651  | INDEX       | 33 PRKCA | 4.5709E-14 | 0.97 | 0 | 4  | 0 | 0 | 0 |
| rs9909004   | rs9892651  | INDEX       | 33 PRKCA | -          | 0.99 | 0 | 41 | 0 | 0 | 0 |
| rs9910355   | rs9892651  | INDEX       | 33 PRKCA | 5.6163E-14 | 0.96 | 1 | 2  | 0 | 1 | 0 |
| rs9910577   | rs9892651  | INDEX       | 33 PRKCA | 6.6581E-14 | 0.96 | 0 | 9  | 0 | 0 | 0 |
| rs9912468   | rs9892651  | INDEX       | 33 PRKCA | 4.0585E-14 | 0.97 | 0 | 0  | 0 | 0 | 0 |
| rs10221267  | rs1396515  | INDEX       | 34 KCN2  | -          | 0.90 | 0 | 1  | 0 | 0 | 0 |
| rs10445231  | rs17763769 | OTHERSIGNAL | 34 KCN2  | 0.026886   | 0.84 | 0 | 0  | 0 | 0 | 0 |
| rs10775360  | rs10775360 | OTHERSIGNAL | 34 KCN2  | 1.0739E-12 | 1.00 | 0 | 1  | 0 | 0 | 0 |
| rs10852724  | rs10775360 | OTHERSIGNAL | 34 KCN2  | -          | 1.00 | 0 | 0  | 0 | 0 | 0 |
| rs1120297   | rs1396515  | INDEX       | 34 KCN2  | 1.13E-23   | 0.99 | 0 | 0  | 0 | 0 | 0 |
| rs11654387  | rs1396515  | INDEX       | 34 KCN2  | 1.32E-21   | 0.95 | 0 | 0  | 0 | 0 | 0 |
| rs11868103  | rs17763769 | OTHERSIGNAL | 34 KCN2  | -          | 0.98 | 0 | 0  | 0 | 0 | 0 |
| rs12103465  | rs1396515  | INDEX       | 34 KCN2  | 9.43E-23   | 0.88 | 0 | 1  | 0 | 0 | 0 |
| rs12103757  | rs1396515  | INDEX       | 34 KCN2  | -          | 0.88 | 0 | 1  | 0 | 0 | 0 |
| rs1396513   | rs1396515  | INDEX       | 34 KCN2  | -          | 0.97 | 0 | 0  | 1 | 0 | 0 |
| rs1396514   | rs1396515  | INDEX       | 34 KCN2  | 1.64E-23   | 1.00 | 0 | 1  | 1 | 0 | 0 |
| rs1396515   | rs1396515  | INDEX       | 34 KCN2  | 2.01E-25   | 1.00 | 0 | 1  | 1 | 0 | 0 |
| rs1396517   | rs1396515  | INDEX       | 34 KCN2  | 1.89E-23   | 0.97 | 0 | 0  | 1 | 0 | 0 |
| rs140229087 | rs17763769 | OTHERSIGNAL | 34 KCN2  | -          | 0.94 | 0 | 0  | 0 | 0 | 0 |
| rs143379259 | rs17763769 | OTHERSIGNAL | 34 KCN2  | -          | 1.00 | 0 | 0  | 1 | 0 | 0 |
| rs146789811 | rs17763769 | OTHERSIGNAL | 34 KCN2  | -          | 0.87 | 0 | 0  | 0 | 0 | 0 |
| rs148491234 | rs1396515  | INDEX       | 34 KCN2  | -          | 0.80 | 0 | 0  | 1 | 0 | 0 |
| rs149316268 | rs17763769 | OTHERSIGNAL | 34 KCN2  | -          | 0.84 | 0 | 0  | 0 | 0 | 0 |
| rs150310449 | rs1396515  | INDEX       | 34 KCN2  | -          | 0.85 | 0 | 1  | 0 | 0 | 0 |
| rs151082794 | rs17763769 | OTHERSIGNAL | 34 KCN2  | -          | 0.94 | 0 | 0  | 0 | 0 | 0 |
| rs1588278   | rs1396515  | INDEX       | 34 KCN2  | 8.30E-23   | 0.88 | 0 | 0  | 1 | 0 | 0 |
| rs1605749   | rs1396515  | INDEX       | 34 KCN2  | 7.13E-23   | 0.89 | 0 | 2  | 0 | 0 | 0 |
| rs1605750   | rs1396515  | INDEX       | 34 KCN2  | 2.97E-23   | 0.90 | 0 | 0  | 0 | 0 | 0 |
| rs17715938  | rs10775360 | OTHERSIGNAL | 34 KCN2  | 9.819E-12  | 1.00 | 0 | 2  | 1 | 0 | 0 |
| rs17763769  | rs17763769 | OTHERSIGNAL | 34 KCN2  | 4.7729E-11 | 1.00 | 0 | 5  | 1 | 0 | 0 |
| rs17778418  | rs10775360 | OTHERSIGNAL | 34 KCN2  | 0.28177    | 1.00 | 0 | 1  | 0 | 0 | 0 |
| rs17780198  | rs17763769 | OTHERSIGNAL | 34 KCN2  | 3.5241E-11 | 0.95 | 0 | 0  | 0 | 0 | 0 |
| rs1911970   | rs1396515  | INDEX       | 34 KCN2  | -          | 0.86 | 0 | 0  | 0 | 0 | 0 |
| rs2024186   | rs1396515  | INDEX       | 34 KCN2  | 3.1291E-06 | 0.96 | 0 | 0  | 0 | 0 | 0 |
| rs2035582   | rs17763769 | OTHERSIGNAL | 34 KCN2  | 0.040014   | 0.93 | 0 | 0  | 0 | 0 | 0 |
| rs2159437   | rs1396515  | INDEX       | 34 KCN2  | 1.22E-24   | 0.94 | 0 | 0  | 0 | 0 | 0 |
| rs236521    | rs236586   | OTHERSIGNAL | 34 KCN2  | -          | 0.98 | 0 | 0  | 0 | 0 | 0 |
| rs236523    | rs236586   | OTHERSIGNAL | 34 KCN2  | 4.7693E-11 | 0.97 | 0 | 3  | 0 | 0 | 0 |
| rs236586    | rs236586   | OTHERSIGNAL | 34 KCN2  | 6.0138E-11 | 1.00 | 0 | 7  | 0 | 0 | 0 |
| rs236591    | rs236586   | OTHERSIGNAL | 34 KCN2  | 0.072509   | 0.99 | 0 | 0  | 0 | 0 | 0 |
| rs236595    | rs236586   | OTHERSIGNAL | 34 KCN2  | 7.9529E-11 | 0.98 | 0 | 0  | 0 | 0 | 0 |
| rs35813361  | rs17763769 | OTHERSIGNAL | 34 KCN2  | -          | 0.98 | 0 | 1  | 1 | 0 | 0 |
| rs41408048  | rs17763769 | OTHERSIGNAL | 34 KCN2  | -          | 0.86 | 0 | 5  | 0 | 0 | 0 |
| rs41459950  | rs17763769 | OTHERSIGNAL | 34 KCN2  | -          | 0.88 | 0 | 2  | 0 | 0 | 0 |
| rs4436818   | rs1396515  | INDEX       | 34 KCN2  | 9.33E-22   | 0.90 | 0 | 0  | 0 | 0 | 0 |
| rs4519367   | rs1396515  | INDEX       | 34 KCN2  | -          | 0.84 | 0 | 0  | 0 | 0 | 0 |
| rs4603601   | rs1396515  | INDEX       | 34 KCN2  | 3.74E-23   | 0.89 | 0 | 0  | 0 | 0 | 0 |
| rs4640232   | rs1396515  | INDEX       | 34 KCN2  | 2.74E-23   | 0.90 | 0 | 0  | 0 | 0 | 0 |
| rs4793370   | rs1396515  | INDEX       | 34 KCN2  | -          | 0.89 | 0 | 0  | 0 | 0 | 0 |
| rs4793394   | rs1396515  | INDEX       | 34 KCN2  | 1.49E-20   | 0.83 | 0 | 0  | 0 | 0 | 0 |
| rs4793395   | rs1396515  | INDEX       | 34 KCN2  | 1.37E-20   | 0.84 | 0 | 0  | 0 | 0 | 0 |
| rs6501392   | rs1396515  | INDEX       | 34 KCN2  | 6.65E-24   | 0.99 | 0 | 3  | 0 | 0 | 0 |
| rs71357754  | rs1396515  | INDEX       | 34 KCN2  | -          | 0.88 | 0 | 0  | 0 | 0 | 0 |
| rs717118    | rs1396515  | INDEX       | 34 KCN2  | 3.37E-23   | 0.91 | 0 | 2  | 0 | 0 | 0 |
| rs7211586   | rs1396515  | INDEX       | 34 KCN2  | -          | 0.85 | 0 | 0  | 0 | 0 | 0 |
| rs7213968   | rs1396515  | INDEX       | 34 KCN2  | -          | 0.86 | 0 | 0  | 0 | 0 | 0 |
| rs72529845  | rs1396515  | INDEX       | 34 KCN2  | -          | 0.92 | 0 | 5  | 0 | 0 | 0 |
| rs72855754  | rs17763769 | OTHERSIGNAL | 34 KCN2  | -          | 0.95 | 0 | 1  | 0 | 0 | 0 |
| rs72855903  | rs17763769 | OTHERSIGNAL | 34 KCN2  | -          | 0.88 | 0 | 1  | 0 | 0 | 0 |
| rs72855940  | rs17763769 | OTHERSIGNAL | 34 KCN2  | -          | 0.99 | 0 | 0  | 0 | 0 | 0 |
| rs72868952  | rs17763769 | OTHERSIGNAL | 34 KCN2  | -          | 0.88 | 0 | 5  | 1 | 0 | 0 |
| rs72868953  | rs17763769 | OTHERSIGNAL | 34 KCN2  | -          | 0.88 | 1 | 15 | 0 | 0 | 0 |
| rs76665103  | rs17763769 | OTHERSIGNAL | 34 KCN2  | -          | 0.89 | 0 | 0  | 0 | 0 | 0 |
| rs766752    | rs1396515  | INDEX       | 34 KCN2  | -          | 0.97 | 0 | 0  | 0 | 0 | 0 |
| rs78014203  | rs17763769 | OTHERSIGNAL | 34 KCN2  | -          | 0.98 | 0 | 0  | 0 | 0 | 0 |
| rs8066985   | rs1396515  | INDEX       | 34 KCN2  | 2.17E-23   | 0.95 | 0 | 0  | 0 | 0 | 0 |
| rs8070093   | rs1396515  | INDEX       | 34 KCN2  | 3.37E-23   | 0.90 | 0 | 1  | 0 | 0 | 0 |
| rs8072275   | rs1396515  | INDEX       | 34 KCN2  | 1.61E-21   | 0.86 | 0 | 0  | 0 | 0 | 0 |
| rs8073911   | rs1396515  | INDEX       | 34 KCN2  | -          | 0.86 | 0 | 1  | 0 | 0 | 0 |
| rs9302917   | rs1396515  | INDEX       | 34 KCN2  | 7.94E-22   | 0.86 | 0 | 0  | 0 | 0 | 0 |
| rs981106    | rs1396515  | INDEX       | 34 KCN2  | 7.79E-23   | 0.89 | 0 | 1  | 1 | 0 | 0 |
| rs9890689   | rs1396515  | INDEX       | 34 KCN2  | 2.74E-21   | 0.96 | 0 | 0  | 1 | 0 | 0 |
| rs9894256   | rs1396515  | INDEX       | 34 KCN2  | 1.06E-20   | 0.83 | 0 | 0  | 0 | 0 | 0 |
| rs9896031   | rs1396515  | INDEX       | 34 KCN2  | -          | 0.86 | 0 | 0  | 0 | 0 | 0 |
| rs9897538   | rs1396515  | INDEX       | 34 KCN2  | 3.30E-22   | 0.99 | 0 | 2  | 0 | 0 | 0 |
| rs9899335   | rs1396515  | INDEX       | 34 KCN2  | 1.21E-21   | 0.86 | 0 | 13 | 0 | 0 | 0 |
| rs9899840   | rs1396515  | INDEX       | 34 KCN2  | 4.03E-23   | 0.89 | 0 | 0  | 0 | 0 | 0 |
| rs9904355   | rs1396515  | INDEX       | 34 KCN2  | 0.019643   | 0.94 | 0 | 0  | 0 | 0 | 0 |
| rs9904480   | rs1396515  | INDEX       | 34 KCN2  | -          | 0.94 | 0 | 0  | 0 | 0 | 0 |
| rs9912702   | rs1396515  | INDEX       | 34 KCN2  | 9.48E-24   | 0.95 | 0 | 0  | 0 | 0 | 0 |

|           |           |       |          |           |      |   |   |   |   |   |
|-----------|-----------|-------|----------|-----------|------|---|---|---|---|---|
| rs9913332 | rs1396515 | INDEX | 34 KCNJ2 | 4.85E-21  | 0.88 | 0 | 0 | 0 | 0 | 0 |
| rs9916380 | rs1396515 | INDEX | 34 KCNJ2 | -         | 0.97 | 0 | 0 | 0 | 0 | 0 |
| rs1805128 | rs1805128 | INDEX | 35 KCNE1 | 0.0037693 | 1.00 | 0 | 1 | 0 | 0 | 0 |



Supplementary Table 14 (3 pages): Magenta analyses. Shown are the Gene Set Enrichment Analysis p-values testing for association of QT-interval associated SNPs with pathways in GO, INGENUITY, KEGG and PANTHER databases.

| Gene set                                             | NOMINAL  |          | EXP #  | OBS #  |
|------------------------------------------------------|----------|----------|--------|--------|
|                                                      | GSEA     | FDR      | GENES  | GENES  |
|                                                      | PVAL     | FDR      | ABOVE  | ABOVE  |
|                                                      | 95PERC   | 95PERC   | 95PERC | 95PERC |
|                                                      | CUTOFF   | CUTOFF   | CUTOFF | CUTOFF |
| regulation of the force of heart contraction         | 1.00E-04 | 6.00E-03 | 1      | 6      |
| inorganic anion exchanger activity                   | 1.67E-04 | 3.14E-02 | 1      | 5      |
| voltage-gated ion channel activity                   | 2.00E-04 | 3.58E-01 | 7      | 17     |
| Voltage-gated_potassium_channel                      | 4.00E-04 | 2.19E-01 | 4      | 12     |
| anion transmembrane transporter activity             | 4.00E-04 | 2.29E-02 | 1      | 5      |
| blood circulation                                    | 5.00E-04 | 2.62E-01 | 2      | 9      |
| Cation_transport                                     | 5.25E-04 | 3.89E-01 | 22     | 37     |
| anion transport                                      | 1.20E-03 | 2.14E-01 | 1      | 5      |
| cellular calcium ion homeostasis                     | 1.40E-03 | 2.70E-01 | 3      | 9      |
| transcription repressor activity                     | 1.60E-03 | 3.66E-01 | 8      | 17     |
| Extracellular_transport_and_import                   | 2.40E-03 | 2.04E-01 | 4      | 10     |
| cAMP biosynthetic process                            | 2.70E-03 | 2.55E-01 | 1      | 4      |
| Nucleic_acid_binding                                 | 3.10E-03 | 2.40E-01 | 31     | 45     |
| potassium ion transport                              | 3.10E-03 | 4.02E-01 | 7      | 16     |
| chromatin modification                               | 3.40E-03 | 3.90E-01 | 10     | 19     |
| protein localization                                 | 4.20E-03 | 3.71E-01 | 3      | 8      |
| ATP binding                                          | 4.50E-03 | 5.03E-01 | 65     | 83     |
| membrane depolarization                              | 4.50E-03 | 2.48E-01 | 1      | 4      |
| Meiosis                                              | 4.70E-03 | 2.56E-01 | 3      | 9      |
| transcription factor activity                        | 5.90E-03 | 5.34E-01 | 41     | 56     |
| nucleotide metabolic process                         | 6.70E-03 | 3.95E-01 | 1      | 5      |
| VEGF.Signaling                                       | 6.90E-03 | 1.06E-01 | 1      | 4      |
| Cation_transporter                                   | 6.90E-03 | 3.16E-01 | 5      | 12     |
| Transporter                                          | 7.20E-03 | 3.45E-01 | 4      | 9      |
| KEGG_MELANOGENESIS                                   | 7.50E-03 | 1.00E+00 | 5      | 11     |
| Homeostasis                                          | 7.80E-03 | 2.26E-01 | 3      | 8      |
| nucleoside diphosphate kinase activity               | 8.00E-03 | 3.34E-01 | 0      | 3      |
| GABA-B_receptor_II_signaling                         | 8.30E-03 | 2.41E-01 | 0      | 3      |
| cellular response to oxidative stress                | 8.30E-03 | 2.89E-01 | 0      | 3      |
| response to hypoxia                                  | 8.40E-03 | 5.22E-01 | 6      | 13     |
| UTP biosynthetic process                             | 8.40E-03 | 3.18E-01 | 0      | 3      |
| GTP biosynthetic process                             | 8.40E-03 | 2.40E-01 | 0      | 3      |
| regulation of transcription from RNA polymerase II p | 9.00E-03 | 5.31E-01 | 10     | 18     |
| activation of protein kinase A activity              | 9.40E-03 | 3.84E-01 | 1      | 4      |
| regulation of gene expression by genetic imprinting  | 9.50E-03 | 2.80E-01 | 1      | 3      |
| regulation of ARF GTPase activity                    | 9.60E-03 | 3.95E-01 | 1      | 5      |
| Protein_phosphorylation                              | 1.04E-02 | 3.65E-01 | 29     | 41     |
| G1 phase of mitotic cell cycle                       | 1.07E-02 | 3.07E-01 | 1      | 3      |
| KEGG_DILATED_CARDIOMYOPATHY                          | 1.12E-02 | 7.05E-01 | 4      | 10     |
| ARF GTPase activator activity                        | 1.15E-02 | 3.95E-01 | 1      | 5      |

|                                                       |          |          |    |    |
|-------------------------------------------------------|----------|----------|----|----|
| Nitric.Oxide.Signaling.in.the.Cardiovascular.System   | 1.16E-02 | 2.06E-01 | 1  | 3  |
| Protein_phosphatase                                   | 1.23E-02 | 2.63E-01 | 6  | 13 |
| Ras protein signal transduction                       | 1.24E-02 | 5.39E-01 | 3  | 8  |
| CTP biosynthetic process                              | 1.24E-02 | 3.78E-01 | 1  | 3  |
| Transmembrane_receptor_regulatory/adaptor_prot        | 1.31E-02 | 2.50E-01 | 3  | 8  |
| Adenylate_cyclase                                     | 1.35E-02 | 2.38E-01 | 1  | 3  |
| muscle myosin complex                                 | 1.35E-02 | 3.58E-01 | 1  | 3  |
| Action_potential_propagation                          | 1.36E-02 | 2.15E-01 | 1  | 4  |
| protein self-association                              | 1.36E-02 | 3.57E-01 | 1  | 3  |
| transcription factor binding                          | 1.37E-02 | 5.56E-01 | 7  | 14 |
| Kinase                                                | 1.42E-02 | 2.76E-01 | 2  | 5  |
| trophectodermal cell differentiation                  | 1.50E-02 | 3.62E-01 | 1  | 3  |
| learning or memory                                    | 1.50E-02 | 4.78E-01 | 2  | 5  |
| regulation of G-protein coupled receptor protein sigl | 1.53E-02 | 4.43E-01 | 1  | 5  |
| Chromatin_packaging_and_remodeling                    | 1.55E-02 | 3.67E-01 | 8  | 14 |
| histone-lysine N-methyltransferase activity           | 1.55E-02 | 4.04E-01 | 1  | 4  |
| Spermatogenesis_and_motility                          | 1.58E-02 | 3.88E-01 | 5  | 10 |
| regulation of heart contraction                       | 1.69E-02 | 4.83E-01 | 2  | 5  |
| RNA polymerase II transcription factor activity       | 1.73E-02 | 6.01E-01 | 6  | 12 |
| Heart_development                                     | 1.73E-02 | 3.17E-01 | 2  | 6  |
| cation channel activity                               | 1.75E-02 | 3.89E-01 | 1  | 3  |
| basolateral plasma membrane                           | 1.81E-02 | 6.04E-01 | 5  | 10 |
| adenylate cyclase activity                            | 1.85E-02 | 3.81E-01 | 1  | 3  |
| positive regulation of vasodilation                   | 1.89E-02 | 3.87E-01 | 1  | 3  |
| delayed rectifier potassium channel activity          | 1.95E-02 | 4.01E-01 | 1  | 3  |
| KEGG_OOCYTE_MEIOSIS                                   | 2.03E-02 | 7.10E-01 | 6  | 11 |
| methyltransferase activity                            | 2.06E-02 | 5.94E-01 | 6  | 11 |
| caveola                                               | 2.10E-02 | 5.26E-01 | 2  | 6  |
| KEGG_VEGF_SIGNALING_PATHWAY                           | 2.10E-02 | 7.37E-01 | 4  | 8  |
| cardiac muscle tissue development                     | 2.16E-02 | 3.93E-01 | 1  | 3  |
| Angiotensin_II-stimulated_signaling_through_G_pro     | 2.17E-02 | 1.89E-01 | 0  | 2  |
| calcium-dependent phospholipid binding                | 2.26E-02 | 4.91E-01 | 1  | 4  |
| KEGG_VASCULAR_SMOOTH_MUSCLE_CONTRACTIO                | 2.28E-02 | 5.60E-01 | 6  | 11 |
| nucleotide binding                                    | 2.33E-02 | 6.40E-01 | 85 | 98 |
| KEGG_WNT_SIGNALING_PATHWAY                            | 2.39E-02 | 5.54E-01 | 7  | 13 |
| nucleoside-triphosphatase activity                    | 2.46E-02 | 5.96E-01 | 3  | 7  |
| Z disc                                                | 2.50E-02 | 5.76E-01 | 2  | 6  |
| oligodendrocyte development                           | 2.61E-02 | 4.68E-01 | 1  | 3  |
| multicellular organismal development                  | 2.79E-02 | 6.33E-01 | 40 | 51 |
| phosphoprotein phosphatase activity                   | 2.80E-02 | 6.12E-01 | 2  | 5  |
| aging                                                 | 2.82E-02 | 6.06E-01 | 3  | 7  |
| De_novo_purine_biosynthesis                           | 2.85E-02 | 6.43E-01 | 1  | 4  |
| biosynthetic process                                  | 2.91E-02 | 5.98E-01 | 2  | 6  |
| cell-cell signaling                                   | 3.01E-02 | 6.22E-01 | 11 | 18 |
| ubiquitin-dependent protein catabolic process         | 3.16E-02 | 6.13E-01 | 7  | 12 |

|                                                       |          |          |    |    |
|-------------------------------------------------------|----------|----------|----|----|
| protein complex                                       | 3.17E-02 | 6.47E-01 | 7  | 12 |
| Immunoglobulin                                        | 3.20E-02 | 3.65E-01 | 0  | 2  |
| Actin_binding_cytoskeletal_protein                    | 3.24E-02 | 4.73E-01 | 4  | 8  |
| Chromatin/chromatin-binding_protein                   | 3.27E-02 | 4.83E-01 | 6  | 11 |
| Other_transcription_factor                            | 3.51E-02 | 4.80E-01 | 16 | 23 |
| nucleoplasm                                           | 3.54E-02 | 6.42E-01 | 21 | 30 |
| negative regulation of endothelial cell proliferation | 3.57E-02 | 5.33E-01 | 1  | 3  |
| 2-oxoglutarate metabolic process                      | 3.61E-02 | 5.65E-01 | 1  | 3  |
| receptor-mediated endocytosis                         | 3.71E-02 | 6.22E-01 | 2  | 5  |
| manganese ion binding                                 | 3.72E-02 | 5.85E-01 | 1  | 4  |
| ubiquitin thiolesterase activity                      | 3.79E-02 | 6.33E-01 | 3  | 7  |
| Basic_helix-loop-helix_transcription_factor           | 3.95E-02 | 4.69E-01 | 5  | 9  |
| KEGG_ALPHA_LINOLENIC_ACID_METABOLISM                  | 4.03E-02 | 8.28E-01 | 1  | 3  |
| DNA_methyltransferase                                 | 4.10E-02 | 3.12E-01 | 1  | 3  |
| cation transport                                      | 4.11E-02 | 6.41E-01 | 3  | 7  |
| ion transport                                         | 4.13E-02 | 6.85E-01 | 24 | 32 |
| attachment of GPI anchor to protein                   | 4.21E-02 | 4.79E-01 | 0  | 2  |
| muscle contraction                                    | 4.29E-02 | 6.37E-01 | 5  | 9  |
| histone binding                                       | 4.41E-02 | 6.49E-01 | 2  | 5  |
| KEGG_VIBRIO_CHOLERAE_INFECTIO                         | 4.47E-02 | 6.10E-01 | 3  | 6  |
| KEGG_FC_GAMMA_R_MEDIATED_PHAGOCYTOSIS                 | 4.49E-02 | 6.01E-01 | 5  | 9  |
| sarcoplasmic reticulum membrane                       | 4.56E-02 | 6.06E-01 | 1  | 3  |
| protein tyrosine phosphatase activity                 | 4.60E-02 | 6.47E-01 | 4  | 8  |
| ER to Golgi vesicle-mediated transport                | 4.61E-02 | 6.50E-01 | 2  | 5  |
| oxidoreductase activity, acting on paired donors, wit | 4.63E-02 | 6.10E-01 | 1  | 3  |
| intracellular protein transport                       | 4.75E-02 | 6.75E-01 | 9  | 14 |
| structural constituent of muscle                      | 4.79E-02 | 6.26E-01 | 2  | 5  |
| regulation of fatty acid oxidation                    | 4.83E-02 | 6.05E-01 | 1  | 3  |
| KEGG_PHENYLALANINE_METABOLISM                         | 4.87E-02 | 6.35E-01 | 1  | 3  |
| transcriptional repressor complex                     | 4.94E-02 | 6.52E-01 | 1  | 4  |

R2 increment for genome-wide significant SNPs in explaining age-, sex-, RR-adjusted QT interval

|      | 35 SNPs | 68 SNPs | 60 SNPs from GWiS |
|------|---------|---------|-------------------|
| ARIC | 5.5%    | 7.6%    | 7.4%              |
| FHS  | 5.8%    | 8.3%    | NA                |
| ERGO | 7.0%    | 9.9%    | NA                |

Supplementary Table 15: Proportion variance explained by QT SNPs. Shown is the proportion of variance in QT (adjusted for age, sex and RR interval) explained by the 35 sentinel QT interval SNPs at 35 loci, as well as by 68 independent ( $r^2 < 0.05$ ) SNPs at 35 loci compared to a model without the SNPs in 3 large cohort studies. In addition, 60 independent SNPs selected by GWiS (see Supplementary Table 15) were tested in one cohort.

Supplementary Table 16 (2 pages): GWIS analysis. Shown are SNPs selected by GWIS (see Methods for details) as independent QT-associated SNPs at 35 loci that achieved genome-wide significance in association of GWAS+replication samples. Loci are indicated by GeneID with multiple SNPs at some loci. The estimated variance explained is shown per SNP and per locus (which may include more than one SNP). The GWIS analysis incorporates LD information from ARIC and association information from the GWAS meta-analysis (without replication results incorporated).

| Supplementary Table 16a: |           | Results for all SNPs at genome-wide significant loci |             |             |        |      |         |            |          |         |        |   |          |             |             |         |         |           |
|--------------------------|-----------|------------------------------------------------------|-------------|-------------|--------|------|---------|------------|----------|---------|--------|---|----------|-------------|-------------|---------|---------|-----------|
| Chr                      | GeneID    | Name                                                 | Start       | End         | Length | SNPs | Tests   | SNP.name   | SNP.pos  | SNP.MAF | SNP.R2 | K | SSM      | VarExp      | BIC         | f.stat  | R2      |           |
| 1                        | GeneID:1  | RNF207                                               | 6,071,709   | 6,245,523   | 173815 | 834  | 96.1617 | rs846111   | 6201957  | 0.281   | -      | 1 | 1        | 0.726131    | 0.00213568  | 71.2677 | 163.078 | 0         |
| 1                        | GeneID:1  | RNF207                                               | 6,071,709   | 6,245,523   | 173815 | 834  | 96.1617 | SUMMARY    | -        | -       | -      | 1 | 1        | 0.726131    | 0.00213568  | 71.2677 | 163.078 | -         |
| 1                        | GeneID:2  | TCEA3                                                | 23,491,293  | 23,625,485  | 134193 | 517  | 50.19   | rs2298632  | 23583062 | 0.4988  | -      | 1 | 1        | 0.270607    | 0.000795902 | 20.7988 | 60.6928 | 0         |
| 1                        | GeneID:2  | TCEA3                                                | 23,491,293  | 23,625,485  | 134193 | 517  | 50.19   | rs946267   | 23620290 | 0.1403  | -      | 1 | 2        | 0.349358    | 0.000231618 | 20.8083 | 34.9414 | 0.0549715 |
| 1                        | GeneID:2  | TCEA3                                                | 23,491,293  | 23,625,485  | 134193 | 517  | 50.19   | SUMMARY    | -        | -       | -      | 2 | 2        | 0.349358    | 0.00102752  | 20.8083 | 39.1863 | -         |
| 1                        | GeneID:3  | NOS1AP                                               | 160,240,600 | 160,705,156 | 464557 | 1596 | 131.26  | rs12143842 | #####    | 0.2443  | -      | 1 | 1        | 4.20778     | 0.0123758   | 463.951 | 954.805 | 0         |
| 1                        | GeneID:3  | NOS1AP                                               | 160,240,600 | 160,705,156 | 464557 | 1596 | 131.26  | rs3934467  | #####    | 0.2232  | -      | 1 | 2        | 5.37438     | 0.0034312   | 586.746 | 584.317 | 0.0775377 |
| 1                        | GeneID:3  | NOS1AP                                               | 160,240,600 | 160,705,156 | 464557 | 1596 | 131.26  | rs12090201 | #####    | 0.0964  | -      | 1 | 3        | 5.74192     | 0.001081    | 619.233 | 180.899 | 0.0190682 |
| 1                        | GeneID:3  | NOS1AP                                               | 160,240,600 | 160,705,156 | 464557 | 1596 | 131.26  | rs12025136 | #####    | 0.7438  | -      | 1 | 4        | 8.5197      | 0.003237    | 622.69  | 164.698 | 0.0591093 |
| 1                        | GeneID:3  | NOS1AP                                               | 160,240,600 | 160,705,156 | 464557 | 1596 | 131.26  | rs4657166  | #####    | 0.7028  | -      | 1 | 5        | 5.95865     | 0.0003137   | 625.998 | 461.562 | 0.297037  |
| 1                        | GeneID:3  | NOS1AP                                               | 160,240,600 | 160,705,156 | 464557 | 1596 | 131.26  | rs2655732  | #####    | 0.4243  | -      | 1 | 6        | 6.03706     | 0.0002307   | 626.275 | 32.9139 | 0.0052209 |
| 1                        | GeneID:3  | NOS1AP                                               | 160,240,600 | 160,705,156 | 464557 | 1596 | 131.26  | SUMMARY    | -        | -       | -      | 6 | 6.03706  | 0.0177561   | 626.275     | 229.551 | -       |           |
| 1                        | GeneID:4  | DPT_ATP1E                                            | 166,929,898 | 167,778,502 | 848605 | 2125 | 150.888 | rs10919070 | #####    | 0.8726  | -      | 1 | 1        | 0.596612    | 0.001175474 | 56.2755 | 133.939 | 0         |
| 1                        | GeneID:4  | DPT_ATP1E                                            | 166,929,898 | 167,778,502 | 848605 | 2125 | 150.888 | rs12061601 | #####    | 0.8825  | -      | 1 | 2        | 0.972088    | 0.00110434  | 88.5098 | 84.6155 | 0.0044386 |
| 1                        | GeneID:4  | DPT_ATP1E                                            | 166,929,898 | 167,778,502 | 848605 | 2125 | 150.888 | rs17502732 | #####    | 0.0518  | -      | 1 | 3        | 1.24557     | 0.00080437  | 109.731 | 62.952  | 0.0001288 |
| 1                        | GeneID:4  | DPT_ATP1E                                            | 166,929,898 | 167,778,502 | 848605 | 2125 | 150.888 | rs545833   | #####    | 0.2673  | -      | 1 | 4        | 1.34623     | 0.00029605  | 111.822 | 63.1373 | 0.166901  |
| 1                        | GeneID:4  | DPT_ATP1E                                            | 166,929,898 | 167,778,502 | 848605 | 2125 | 150.888 | rs12564558 | #####    | 0.9405  | -      | 1 | 5        | 1.43696     | 0.00026685  | 113.03  | 39.4824 | 0.045542  |
| 1                        | GeneID:4  | DPT_ATP1E                                            | 166,929,898 | 167,778,502 | 848605 | 2125 | 150.888 | rs17349138 | #####    | 0.5532  | -      | 1 | 6        | 1.52326     | 0.00025384  | 113.931 | 68.4349 | 0.114986  |
| 1                        | GeneID:4  | DPT_ATP1E                                            | 166,929,898 | 167,778,502 | 848605 | 2125 | 150.888 | SUMMARY    | -        | -       | -      | 6 | 1.52326  | 0.00448019  | 113.931     | 57.1477 | -       |           |
| 2                        | GeneID:5  | SLC8A1                                               | 40,193,490  | 40,635,501  | 442012 | 1808 | 103.789 | rs12997022 | 40606486 | 0.9502  | -      | 1 | 1        | 0.252463    | 0.000742538 | 18.0375 | 56.6204 | 0         |
| 2                        | GeneID:5  | SLC8A1                                               | 40,193,490  | 40,635,501  | 442012 | 1808 | 103.789 | rs6544311  | 40206781 | 0.3808  | -      | 1 | 2        | 0.433748    | 0.000533192 | 28.8121 | 40.7517 | 0.0025257 |
| 2                        | GeneID:5  | SLC8A1                                               | 40,193,490  | 40,635,501  | 442012 | 1808 | 103.789 | SUMMARY    | -        | -       | -      | 2 | 0.433748 | 0.00127573  | 28.8121     | 48.6642 | -       |           |
| 2                        | GeneID:6  | SP3                                                  | 174,447,598 | 174,452,072 | 4475   | 887  | 89.1393 | rs13002675 | #####    | 0.186   | -      | 1 | 1        | 0.147055    | 0.000432514 | 6.37118 | 32.9701 | 0         |
| 2                        | GeneID:6  | SP3                                                  | 174,447,598 | 174,452,072 | 4475   | 887  | 89.1393 | SUMMARY    | -        | -       | -      | 1 | 0.147055 | 0.000432514 | 6.37118     | 32.9701 | -       |           |
| 2                        | GeneID:7  | CCDC141                                              | 179,398,101 | 179,399,915 | 1815   | 784  | 52.9721 | rs7600330  | #####    | 0.5829  | -      | 1 | 1        | 0.136362    | 0.000401065 | 5.69291 | 30.5718 | 0         |
| 2                        | GeneID:7  | CCDC141                                              | 179,398,101 | 179,399,915 | 1815   | 784  | 52.9721 | SUMMARY    | -        | -       | -      | 1 | 0.136362 | 0.000401065 | 5.69291     | 30.5718 | -       |           |
| 2                        | GeneID:8  | LOC26010                                             | 200,868,744 | 200,899,279 | 30536  | 926  | 60.5995 | rs11888462 | #####    | 0.4192  | -      | 1 | 1        | 0.15186     | 0.000446647 | 7.29579 | 34.048  | 0         |
| 2                        | GeneID:8  | LOC26010                                             | 200,868,744 | 200,899,279 | 30536  | 926  | 60.5995 | SUMMARY    | -        | -       | -      | 1 | 0.15186  | 0.000446647 | 7.29579     | 34.048  | -       |           |
| 3                        | GeneID:9  | SCN5A_SCN                                            | 38,392,349  | 38,773,840  | 381492 | 976  | 84.3762 | rs6793245  | 38574041 | 0.3208  | -      | 1 | 1        | 0.502789    | 0.00147879  | 46.3263 | 112.845 | 0         |
| 3                        | GeneID:9  | SCN5A_SCN                                            | 38,392,349  | 38,773,840  | 381492 | 976  | 84.3762 | rs3922843  | 38599347 | 0.2568  | -      | 1 | 2        | 0.71445     | 0.00062253  | 60.736  | 49.8789 | 0.0002682 |
| 3                        | GeneID:9  | SCN5A_SCN                                            | 38,392,349  | 38,773,840  | 381492 | 976  | 84.3762 | rs6800541  | 38749836 | 0.5949  | -      | 1 | 3        | 0.883459    | 0.00049709  | 70.7858 | 40.4217 | 0.00026   |
| 3                        | GeneID:9  | SCN5A_SCN                                            | 38,392,349  | 38,773,840  | 381492 | 976  | 84.3762 | rs6599234  | 38690304 | 0.3249  | -      | 1 | 4        | 1.04364     | 0.00047113  | 80.1532 | 40.0629 | 0.0032239 |
| 3                        | GeneID:9  | SCN5A_SCN                                            | 38,392,349  | 38,773,840  | 381492 | 976  | 84.3762 | SUMMARY    | -        | -       | -      | 4 | 1.04364  | 0.00306954  | 80.1532     | 58.6494 | -       |           |
| 3                        | GeneID:10 | C3orf75                                              | 47,350,959  | 47,553,842  | 202884 | 315  | 28.7103 | rs17784882 | 47519007 | 0.399   | -      | 1 | 1        | 0.133178    | 0.000391699 | 5.94848 | 29.8576 | 0         |
| 3                        | GeneID:10 | C3orf75                                              | 47,350,959  | 47,553,842  | 202884 | 315  | 28.7103 | SUMMARY    | -        | -       | -      | 1 | 0.133178 | 0.000391699 | 5.94848     | 29.8576 | -       |           |
| 4                        | GeneID:11 | SLC4A4                                               | 72,240,018  | 72,357,080  | 117063 | 683  | 46.4592 | rs2363719  | 72357080 | 0.1104  | -      | 1 | 1        | 0.163143    | 0.000479832 | 8.82637 | 36.5788 | 0         |
| 4                        | GeneID:11 | SLC4A4                                               | 72,240,018  | 72,357,080  | 117063 | 683  | 46.4592 | SUMMARY    | -        | -       | -      | 1 | 0.163143 | 0.000479832 | 8.82637     | 36.5788 | -       |           |
| 4                        | GeneID:12 | SMARCAD1                                             | 95,245,457  | 95,473,753  | 228297 | 1024 | 75.2791 | rs183993   | 95349048 | 0.5792  | -      | 1 | 1        | 0.147664    | 0.000434306 | 6.60846 | 33.1067 | 0         |
| 4                        | GeneID:12 | SMARCAD1                                             | 95,245,457  | 95,473,753  | 228297 | 1024 | 75.2791 | SUMMARY    | -        | -       | -      | 1 | 0.147664 | 0.000434306 | 6.60846     | 33.1067 | -       |           |
| 5                        | GeneID:13 | PKD2L2                                               | 137,031,668 | 137,821,115 | 789448 | 1092 | 75.6065 | rs1335551f | #####    | 0.8267  | -      | 1 | 1        | 0.183234    | 0.000538924 | 10.5919 | 41.086  | 0         |
| 5                        | GeneID:13 | PKD2L2                                               | 137,031,668 | 137,821,115 | 789448 | 1092 | 75.6065 | SUMMARY    | -        | -       | -      | 1 | 0.183234 | 0.000538924 | 10.5919     | 41.086  | -       |           |
| 6                        | GeneID:14 | GMPR                                                 | 16,356,109  | 16,402,701  | 46593  | 1265 | 128.208 | rs4716056  | 16386369 | 0.613   | -      | 1 | 1        | 0.17443     | 0.000513028 | 9.07669 | 39.1108 | 0         |
| 6                        | GeneID:14 | GMPR                                                 | 16,356,109  | 16,402,701  | 46593  | 1265 | 128.208 | SUMMARY    | -        | -       | -      | 1 | 0.17443  | 0.000513028 | 9.07669     | 39.1108 | -       |           |
| 6                        | GeneID:15 | SLC35F1_PI                                           | 118,545,211 | 119,153,843 | 608633 | 1388 | 85.6662 | rs1115373C | #####    | 0.5011  | -      | 1 | 1        | 1.32803     | 0.00390596  | 139.034 | 298.786 | 0         |
| 6                        | GeneID:15 | SLC35F1_PI                                           | 118,545,211 | 119,153,843 | 608633 | 1388 | 85.6662 | rs1221279E | #####    | 0.0545  | -      | 1 | 2        | 1.58337     | 0.00075102  | 158.404 | 132.435 | 0.0580396 |
| 6                        | GeneID:15 | SLC35F1_PI                                           | 118,545,211 | 119,153,843 | 608633 | 1388 | 85.6662 | rs1771756  | #####    | 0.4424  | -      | 1 | 3        | 1.68597     | 0.00030177  | 161.007 | 215.5   | 0.403238  |
| 6                        | GeneID:15 | SLC35F1_PI                                           | 118,545,211 | 119,153,843 | 608633 | 1388 | 85.6662 | SUMMARY    | -        | -       | -      | 3 | 1.68597  | 0.00495875  | 161.007     | 126.57  | -       |           |
| 7                        | GeneID:16 | CAV1                                                 | 115,987,328 | 115,987,328 | 1      | 734  | 47.6158 | rs9920     | #####    | 0.9055  | -      | 1 | 1        | 0.108442    | 0.000318946 | 2.66974 | 24.3101 | 0         |
| 7                        | GeneID:16 | CAV1                                                 | 115,987,328 | 115,987,328 | 1      | 734  | 47.6158 | SUMMARY    | -        | -       | -      | 1 | 0.108442 | 0.000318946 | 2.66974     | 24.3101 | -       |           |
| 7                        | GeneID:17 | KCNH2                                                | 150,127,461 | 150,320,876 | 193416 | 960  | 103.954 | rs2968863  | #####    | 0.2392  | -      | 1 | 1        | 0.830752    | 0.00244339  | 82.9401 | 186.632 | 0         |
| 7                        | GeneID:17 | KCNH2                                                | 150,127,461 | 150,320,876 | 193416 | 960  | 103.954 | rs6972137  | #####    | 0.8096  | -      | 1 | 2        | 1.22624     | 0.0011632   | 117.83  | 167.85  | 0.0827454 |
| 7                        | GeneID:17 | KCNH2                                                | 150,127,461 | 150,320,876 | 193416 | 960  | 103.954 | SUMMARY    | -        | -       | -      | 2 | 1.22624  | 0.00360659  | 117.83      | 137.899 | -       |           |
| 8                        | GeneID:18 | NCOA2                                                | 71,208,737  | 71,513,712  | 304976 | 957  | 72.8754 | rs1693687C | 71351896 | 0.0986  | -      | 1 | 1        | 0.158539    | 0.000466291 | 7.86008 | 35.5461 | 0         |
| 8                        | GeneID:18 | NCOA2                                                | 71,208,737  | 71,513,712  | 304976 | 957  | 72.8754 | SUMMARY    | -        | -       | -      | 1 | 0.158539 | 0.000466291 | 7.86008     | 35.5461 | -       |           |
| 8                        | GeneID:19 | LAPTM4B                                              | 98,872,905  | 98,933,499  | 60595  | 971  | 85.6488 | rs6995436  | 98880310 | 0.5212  | -      | 1 | 1        | 0.16734     | 0.000492175 | 8.68521 | 37.5203 | 0         |
| 8                        | GeneID:19 | LAPTM4B                                              | 98,872,905  | 98,933,499  | 60595  | 971  | 85.6488 | SUMMARY    | -        | -       | -      | 1 | 0.16734  | 0.000492175 | 8.68521     | 37.5203 | -       |           |
| 8                        | GeneID:20 | AZIN1                                                | 103,916,575 | 104,002,021 | 85447  | 1150 | 101.012 | rs2916558  | #####    | 0.3684  | -      | 1 | 1        | 0.134251    | 0.000394856 | 4.8108  | 30.0983 | 0         |
| 8                        | GeneID:20 | AZIN1                                                | 103,916,575 | 104,002,021 | 85447  | 1150 | 101.012 | SUMMARY    | -        | -       | -      | 1 | 0.134251 | 0.000394856 | 4.8108      | 30.0983 | -       |           |
| 10                       | GeneID:21 | GBF1                                                 | 103,995,376 | 104,104,318 | 108943 | 463  | 33.8115 | rs2485376  | #####    | 0.3887  | -      | 1 | 1        | 0.137998    | 0.000405876 | 6.32525 | 30.9387 | 0         |
| 10                       | GeneID:21 | GBF1                                                 | 103,995,376 | 104,104,318 | 108943 | 463  | 33.8115 | SUMMARY    | -        | -       | -      | 1 | 0.137998 | 0.000405876 | 6.32525     | 30.9387 | -       |           |
| 11                       | GeneID:22 | KCNQ1                                                | 2,288,613   | 2,484,900   | 196288 | 986  | 130.642 | rs7122937  | 2443126  | 0.1916  | -      | 1 | 1        | 1.06536     | 0.00313342  | 109.074 | 239.504 | 0         |
| 11                       | GeneID:22 | KCNQ1                                                | 2,288,613   | 2,484,900   | 196288 | 986  | 130.642 | rs739677   | 2430556  | 0.7657  | -      | 1 | 2        | 1.31975     | 0.00074819  | 127.888 | 57.0919 |           |

|    |           |           |             |             |        |      |         |           |          |        |   |   |          |             |         |         |           |
|----|-----------|-----------|-------------|-------------|--------|------|---------|-----------|----------|--------|---|---|----------|-------------|---------|---------|-----------|
| 12 | GenelD:24 | ATP2A2    | 109,113,875 | 109,567,467 | 453593 | 481  | 51.9027 | rs4630352 | #####    | 0.3528 | 1 | 1 | 0.146736 | 0.000431577 | 6.8763  | 32.8987 | 0         |
| 12 | GenelD:24 | ATP2A2    | 109,113,875 | 109,567,467 | 453593 | 481  | 51.9027 | SUMMARY   | -        | -      | - | 1 | 0.146736 | 0.000431577 | 6.8763  | 32.8987 | -         |
| 13 | GenelD:25 | KLF12     | 73,409,992  | 73,418,187  | 8196   | 1210 | 113.814 | rs728926  | 73411123 | 0.364  | 1 | 1 | 0.140443 | 0.000413066 | 5.38555 | 31.487  | 0         |
| 13 | GenelD:25 | KLF12     | 73,409,992  | 73,418,187  | 8196   | 1210 | 113.814 | SUMMARY   | -        | -      | - | 1 | 0.140443 | 0.000413066 | 5.38555 | 31.487  | -         |
| 14 | GenelD:26 | ANKRD9    | 101,878,083 | 102,044,752 | 166670 | 608  | 51.7251 | rs4906208 | #####    | 0.6481 | 1 | 1 | 0.171069 | 0.000503144 | 9.60763 | 38.3569 | 0         |
| 14 | GenelD:26 | ANKRD9    | 101,878,083 | 102,044,752 | 166670 | 608  | 51.7251 | SUMMARY   | -        | -      | - | 1 | 0.171069 | 0.000503144 | 9.60763 | 38.3569 | -         |
| 15 | GenelD:27 | TRPM7     | 48,538,342  | 48,690,892  | 152551 | 858  | 51.0794 | rs3105593 | 48632310 | 0.4416 | 1 | 1 | 0.217985 | 0.000641134 | 14.8805 | 48.8832 | 0         |
| 15 | GenelD:27 | TRPM7     | 48,538,342  | 48,690,892  | 152551 | 858  | 51.0794 | SUMMARY   | -        | -      | - | 1 | 0.217985 | 0.000641134 | 14.8805 | 48.8832 | -         |
| 16 | GenelD:28 | CREBBP    | 3,792,777   | 3,813,643   | 20867  | 655  | 82.6529 | rs1296720 | 3813643  | 0.8003 | 1 | 1 | 0.17559  | 0.000516442 | 9.64581 | 39.3711 | 0         |
| 16 | GenelD:28 | CREBBP    | 3,792,777   | 3,813,643   | 20867  | 655  | 82.6529 | rs889807  | 4198174  | 0.4823 | 1 | 2 | 0.298008 | 0.000360053 | 14.0432 | 27.4471 | 9.58E-05  |
| 16 | GenelD:28 | CREBBP    | 3,792,777   | 3,813,643   | 20867  | 655  | 82.6529 | SUMMARY   | -        | -      | - | 2 | 0.298008 | 0.000876495 | 14.0432 | 33.4216 | -         |
| 16 | GenelD:29 | LITAF     | 11,574,706  | 11,658,516  | 83811  | 995  | 97.8788 | rs735951  | 11601037 | 0.458  | 1 | 1 | 0.53916  | 0.00158577  | 50.2598 | 121.021 | 0         |
| 16 | GenelD:29 | LITAF     | 11,574,706  | 11,658,516  | 83811  | 995  | 97.8788 | SUMMARY   | -        | -      | - | 1 | 0.53916  | 0.00158577  | 50.2598 | 121.021 | -         |
| 16 | GenelD:30 | MKL2      | 14,285,074  | 14,302,933  | 17860  | 591  | 70.702  | rs1659127 | 14295806 | 0.336  | 1 | 1 | 0.191709 | 0.00056385  | 11.6092 | 42.9873 | 0         |
| 16 | GenelD:30 | MKL2      | 14,285,074  | 14,302,933  | 17860  | 591  | 70.702  | SUMMARY   | -        | -      | - | 1 | 0.191709 | 0.00056385  | 11.6092 | 42.9873 | -         |
| 16 | GenelD:31 | GINS3_CNC | 57,017,427  | 57,273,249  | 255823 | 972  | 103.157 | rs37055   | 57118276 | 0.2568 | 1 | 1 | 1.13576  | 0.00334047  | 117.225 | 255.383 | 0         |
| 16 | GenelD:31 | GINS3_CNC | 57,017,427  | 57,273,249  | 255823 | 972  | 103.157 | rs4784934 | 57017427 | 0.2635 | 1 | 2 | 1.28803  | 0.00044785  | 124.795 | 34.1413 | 4.20E-05  |
| 16 | GenelD:31 | GINS3_CNC | 57,017,427  | 57,273,249  | 255823 | 972  | 103.157 | SUMMARY   | -        | -      | - | 2 | 1.28803  | 0.00378832  | 124.795 | 144.874 | -         |
| 17 | GenelD:32 | RFFL      | 30,165,268  | 30,464,279  | 299012 | 1247 | 120.119 | rs1052536 | 30355688 | 0.4681 | 1 | 1 | 0.460086 | 0.00135319  | 41.1812 | 103.248 | 0         |
| 17 | GenelD:32 | RFFL      | 30,165,268  | 30,464,279  | 299012 | 1247 | 120.119 | SUMMARY   | -        | -      | - | 1 | 0.460086 | 0.00135319  | 41.1812 | 103.248 | -         |
| 17 | GenelD:33 | PRKCA     | 61,630,703  | 61,761,499  | 130797 | 1146 | 78.1473 | rs9892651 | 61734255 | 0.5773 | 1 | 1 | 0.251356 | 0.000739282 | 18.1972 | 56.372  | 0         |
| 17 | GenelD:33 | PRKCA     | 61,630,703  | 61,761,499  | 130797 | 1146 | 78.1473 | SUMMARY   | -        | -      | - | 1 | 0.251356 | 0.000739282 | 18.1972 | 56.372  | -         |
| 17 | GenelD:34 | KCNJ2     | 65,715,141  | 66,125,360  | 410220 | 1472 | 115.689 | rs1396515 | 65942588 | 0.5192 | 1 | 1 | 0.472405 | 0.00138943  | 42.6012 | 106.016 | 0         |
| 17 | GenelD:34 | KCNJ2     | 65,715,141  | 66,125,360  | 410220 | 1472 | 115.689 | rs236523  | 65724237 | 0.5268 | 1 | 2 | 0.592022 | 0.00035181  | 46.3562 | 41.8045 | 0.0167027 |
| 17 | GenelD:34 | KCNJ2     | 65,715,141  | 66,125,360  | 410220 | 1472 | 115.689 | rs4793397 | 66031984 | 0.4828 | 1 | 3 | 0.701791 | 0.00032285  | 49.4246 | 76.0242 | 0.154314  |
| 17 | GenelD:34 | KCNJ2     | 65,715,141  | 66,125,360  | 410220 | 1472 | 115.689 | SUMMARY   | -        | -      | - | 3 | 0.701791 | 0.00206409  | 49.4246 | 52.5322 | -         |
| 21 | GenelD:35 | KCNE1     | 34,743,550  | 34,743,550  | 1      | 877  | 94.8299 | rs2070359 | 34748646 | 0.1793 | 1 | 1 | 0.103345 | 0.000303955 | 1.4095  | 23.1672 | 0         |
| 21 | GenelD:35 | KCNE1     | 34,743,550  | 34,743,550  | 1      | 877  | 94.8299 | SUMMARY   | -        | -      | - | 1 | 0.103345 | 0.000303955 | 1.4095  | 23.1672 | -         |

Supplementary Table 16b: Summary by locus

| Chr   | GenelD    | Name       | Start       | End         | Length | SNPs | Tests   | SNP.name | K | SSM | VarExp    | BIC       | f.stat  | R2      | indexSNP   | VarExpTopSNP |
|-------|-----------|------------|-------------|-------------|--------|------|---------|----------|---|-----|-----------|-----------|---------|---------|------------|--------------|
| 1     | GenelD:1  | RNF207     | 6,071,709   | 6,245,523   | 173815 | 834  | 96.1617 | SUMMARY  | - | 1   | 0.726131  | 0.0021357 | 71.2677 | 163.078 | rs846111   | 0.0021357    |
| 1     | GenelD:2  | TCEA3      | 23,491,293  | 23,625,485  | 134193 | 517  | 50.19   | SUMMARY  | - | 2   | 0.349358  | 0.0010275 | 20.8083 | 39.1863 | rs2298632  | 0.0007959    |
| 1     | GenelD:3  | NOS1AP     | 160,240,600 | 160,705,156 | 464557 | 1596 | 131.26  | SUMMARY  | - | 6   | 6.03706   | 0.0177561 | 626.275 | 229.551 | rs12143842 | 0.0123758    |
| 1     | GenelD:4  | DPT_ATP1E  | 166,929,898 | 167,778,502 | 848605 | 2125 | 150.888 | SUMMARY  | - | 6   | 1.52326   | 0.0044802 | 113.931 | 57.1477 | rs10919070 | 0.0017547    |
| 2     | GenelD:5  | SLC8A1     | 40,193,490  | 40,635,501  | 442012 | 1808 | 103.789 | SUMMARY  | - | 2   | 0.433748  | 0.0012757 | 28.8121 | 48.6642 | rs12997023 | 0.0007425    |
| 2     | GenelD:6  | SP3        | 174,447,598 | 174,452,072 | 4475   | 887  | 89.1393 | SUMMARY  | - | 1   | 0.147055  | 0.0004325 | 6.37118 | 32.9701 | rs13002675 | 0.0004325    |
| 2     | GenelD:7  | CCDC141    | 179,398,101 | 179,399,915 | 1815   | 784  | 52.9721 | SUMMARY  | - | 1   | 0.136362  | 0.0004011 | 5.69291 | 30.5718 | rs7600330  | 0.0004011    |
| 2     | GenelD:8  | LOC26010   | 200,868,744 | 200,899,279 | 30536  | 926  | 60.5995 | SUMMARY  | - | 1   | 0.151586  | 0.0004466 | 7.29579 | 34.048  | rs11888462 | 0.0004466    |
| 3     | GenelD:9  | SCN5A_SCN  | 38,392,349  | 38,773,840  | 381492 | 976  | 84.3762 | SUMMARY  | - | 4   | 1.04364   | 0.0030695 | 80.1532 | 58.6494 | rs6793245  | 0.0014788    |
| 3     | GenelD:10 | C3orf75    | 47,350,959  | 47,553,842  | 202884 | 315  | 28.7103 | SUMMARY  | - | 1   | 0.133178  | 0.0003917 | 5.94848 | 29.8576 | rs17784882 | 0.0003917    |
| 4     | GenelD:11 | SLC4A4     | 72,240,018  | 72,357,080  | 117063 | 683  | 46.4592 | SUMMARY  | - | 1   | 0.163143  | 0.0004798 | 8.82637 | 36.5788 | rs2363719  | 0.0004798    |
| 4     | GenelD:12 | SMARCAD1   | 95,245,457  | 95,473,753  | 228297 | 1024 | 75.2791 | SUMMARY  | - | 1   | 0.147664  | 0.0004343 | 6.60846 | 33.1067 | rs183993   | 0.0004343    |
| 5     | GenelD:13 | PKD2L2     | 137,031,668 | 137,821,115 | 789448 | 1092 | 75.6065 | SUMMARY  | - | 1   | 0.183234  | 0.0005389 | 10.5919 | 41.086  | rs13355516 | 0.0005389    |
| 6     | GenelD:14 | GMPR       | 16,356,109  | 16,402,701  | 46593  | 1265 | 128.208 | SUMMARY  | - | 1   | 0.17443   | 0.000513  | 9.07669 | 39.1108 | rs4716056  | 0.000513     |
| 6     | GenelD:15 | SLC35F1_PI | 118,545,211 | 119,153,843 | 608633 | 1388 | 85.6662 | SUMMARY  | - | 3   | 1.68597   | 0.0049588 | 161.007 | 126.57  | rs11153730 | 0.003906     |
| 7     | GenelD:16 | CAV1       | 115,987,328 | 115,987,328 | 1      | 734  | 47.6158 | SUMMARY  | - | 1   | 0.108442  | 0.0003189 | 2.66974 | 24.3101 | rs9920     | 0.0003189    |
| 7     | GenelD:17 | KCNH2      | 150,127,461 | 150,320,876 | 193416 | 960  | 103.954 | SUMMARY  | - | 2   | 1.22624   | 0.0036066 | 117.83  | 137.899 | rs2968863  | 0.0024434    |
| 8     | GenelD:18 | NCOA2      | 71,208,737  | 71,513,712  | 304976 | 957  | 72.8754 | SUMMARY  | - | 1   | 0.158539  | 0.0004663 | 7.86008 | 35.5461 | rs16936870 | 0.0004663    |
| 8     | GenelD:19 | LAPTM4B    | 98,872,905  | 98,933,499  | 60595  | 971  | 85.6488 | SUMMARY  | - | 1   | 0.16734   | 0.0004922 | 8.68521 | 37.5203 | rs6995436  | 0.0004922    |
| 8     | GenelD:20 | AZIN1      | 103,916,575 | 104,002,021 | 85447  | 1150 | 101.012 | SUMMARY  | - | 1   | 0.134251  | 0.0003949 | 4.8108  | 30.0983 | rs2916558  | 0.0003949    |
| 10    | GenelD:21 | GBF1       | 103,995,376 | 104,104,318 | 108943 | 463  | 33.8115 | SUMMARY  | - | 1   | 0.137998  | 0.0004059 | 6.32525 | 30.9387 | rs2485376  | 0.0004059    |
| 11    | GenelD:22 | KCNQ1      | 2,288,613   | 2,484,900   | 196288 | 986  | 130.642 | SUMMARY  | - | 4   | 1.60414   | 0.0047181 | 141.431 | 90.2968 | rs7122937  | 0.0031334    |
| 11    | GenelD:23 | FEN1       | 61,300,075  | 61,379,716  | 79642  | 639  | 67.8047 | SUMMARY  | - | 1   | 0.184699  | 0.0005432 | 10.8651 | 41.4146 | rs174577   | 0.0005432    |
| 12    | GenelD:24 | ATP2A2     | 109,113,875 | 109,567,467 | 453593 | 481  | 51.9027 | SUMMARY  | - | 1   | 0.146736  | 0.0004316 | 6.8763  | 32.8987 | rs4630352  | 0.0004316    |
| 13    | GenelD:25 | KLF12      | 73,409,992  | 73,418,187  | 8196   | 1210 | 113.814 | SUMMARY  | - | 1   | 0.140443  | 0.0004131 | 5.38555 | 31.487  | rs728926   | 0.0004131    |
| 14    | GenelD:26 | ANKRD9     | 101,878,083 | 102,044,752 | 166670 | 608  | 51.7251 | SUMMARY  | - | 1   | 0.171069  | 0.0005031 | 9.60763 | 38.3569 | rs4906208  | 0.0005031    |
| 15    | GenelD:27 | TRPM7      | 48,538,342  | 48,690,892  | 152551 | 858  | 51.0794 | SUMMARY  | - | 1   | 0.217985  | 0.0006411 | 14.8805 | 48.8832 | rs3105593  | 0.0006411    |
| 16    | GenelD:28 | CREBBP     | 3,792,777   | 3,813,643   | 20867  | 655  | 82.6529 | SUMMARY  | - | 2   | 0.298008  | 0.0008765 | 14.0432 | 33.4216 | rs1296720  | 0.0005164    |
| 16    | GenelD:29 | LITAF      | 11,574,706  | 11,658,516  | 83811  | 995  | 97.8788 | SUMMARY  | - | 1   | 0.53916   | 0.0015858 | 50.2598 | 121.021 | rs735951   | 0.0015858    |
| 16    | GenelD:30 | MKL2       | 14,285,074  | 14,302,933  | 17860  | 591  | 70.702  | SUMMARY  | - | 1   | 0.191709  | 0.0005639 | 11.6092 | 42.9873 | rs1659127  | 0.0005639    |
| 16    | GenelD:31 | GINS3_CNC  | 57,017,427  | 57,273,249  | 255823 | 972  | 103.157 | SUMMARY  | - | 2   | 1.28803   | 0.0037883 | 124.795 | 144.874 | rs37055    | 0.0033405    |
| 17    | GenelD:32 | RFFL       | 30,165,268  | 30,464,279  | 299012 | 1247 | 120.119 | SUMMARY  | - | 1   | 0.460086  | 0.0013532 | 41.1812 | 103.248 | rs1052536  | 0.0013532    |
| 17    | GenelD:33 | PRKCA      | 61,630,703  | 61,761,499  | 130797 | 1146 | 78.1473 | SUMMARY  | - | 1   | 0.251356  | 0.0007393 | 18.1972 | 56.372  | rs9892651  | 0.0007393    |
| 17    | GenelD:34 | KCNJ2      | 65,715,141  | 66,125,360  | 410220 | 1472 | 115.689 | SUMMARY  | - | 3   | 0.701791  | 0.0020641 | 49.4246 | 52.5322 | rs1396515  | 0.0013894    |
| 21    | GenelD:35 | KCNE1      | 34,743,550  | 34,743,550  | 1      | 877  | 94.8299 | SUMMARY  | - | 1   | 0.103345  | 0.000304  | 1.4095  | 23.1672 | rs2070359  | 0.000304     |
| Total |           |            |             |             |        |      |         |          |   | 60  | 0.0625514 |           |         |         |            | 0.0468069    |

Supplementary Table 17 (4 pages): Long QT Syndrome proband phenotypes. Shown are the sex, age, QTc and presence of any LQTS-related cardiac event (cardiac arrest or syncope) for the 298 unrelated individuals with phenotype-positive LQTS but without mutations in LQT1, LQT2, LQT3 genes, who underwent open reading frame mutational analysis of six genes at novel QT interval loci.

| CaseNo    | Gender | Age at Diagnosis (yrs) | QTc (ms) | LQTS-related cardiac events (yes or no) | Comments                                                     |
|-----------|--------|------------------------|----------|-----------------------------------------|--------------------------------------------------------------|
| Nantes_1  | M      | 38                     | 552      | yes                                     |                                                              |
| Nantes_2  | M      | 12                     | 539      | no                                      |                                                              |
| Nantes_3  | M      | 10                     | 655      | not available                           |                                                              |
| Nantes_4  | F      | 12                     | 612      | yes                                     |                                                              |
| Nantes_5  | F      | 23                     | 481      | yes                                     |                                                              |
| Nantes_6  | F      | 78                     | 616      | yes                                     |                                                              |
| Nantes_7  | M      | 14                     | 516      | no                                      |                                                              |
| Nantes_8  | M      | 34                     | 621      | not available                           |                                                              |
| Nantes_9  | M      | 16                     | 631      | no                                      |                                                              |
| Nantes_10 | F      | 16                     | 613      | yes                                     |                                                              |
| Nantes_11 | F      | 29                     | 559      | yes                                     |                                                              |
| Nantes_12 | F      | 12                     | 633      | yes                                     |                                                              |
| Nantes_13 | F      | 12                     | 505      | yes                                     |                                                              |
| Nantes_14 | F      | 23                     | 534      | yes                                     |                                                              |
| Nantes_15 | F      | 47                     | 511      | yes                                     |                                                              |
| Nantes_16 | M      | 42                     | 539      | yes                                     |                                                              |
| Nantes_17 | M      | 52                     | 492      | yes                                     |                                                              |
| Nantes_18 | F      | 24                     | 618      | not available                           |                                                              |
| Nantes_19 | F      | 8                      | 558      | yes                                     |                                                              |
| Nantes_20 | F      | 79                     | 669      | yes                                     |                                                              |
| Nantes_21 | F      | 18                     | 480      | not available                           |                                                              |
| Nantes_22 | M      | 11                     | 641      | yes                                     |                                                              |
| Nantes_23 | F      | 31                     | 552      | yes                                     |                                                              |
| Nantes_24 | F      | 49                     | 622      | yes                                     |                                                              |
| Nantes_25 | M      | 22                     | 647      | yes                                     |                                                              |
| Nantes_26 | M      | 6                      | 505      | no                                      |                                                              |
| Nantes_27 | F      | 63                     | 536      | not available                           |                                                              |
| Nantes_28 | F      | 23                     | 582      | yes                                     |                                                              |
| Nantes_29 | F      | 46                     | 511      | no                                      |                                                              |
| Nantes_30 | F      | 70                     | 647      | yes                                     |                                                              |
| Nantes_31 | M      | 68                     | 537      | no                                      |                                                              |
| Nantes_32 | M      | 13                     | 640      | no                                      |                                                              |
| Nantes_33 | F      | 26                     | 715      | yes                                     |                                                              |
| Nantes_34 | F      | 49                     | 463      | yes                                     | syncope, TdP/VF, no family history Schwartz score >3         |
| Nantes_35 | F      | 18                     | 460      | yes                                     | syncope, no family history Schwartz score>3                  |
| Nantes_36 | F      | 37                     | 486      | yes                                     |                                                              |
| Nantes_37 | M      | 18                     | 600      | no                                      |                                                              |
| Nantes_38 | M      | 2                      | 604      | yes                                     |                                                              |
| Nantes_39 | M      | 23                     | 531      | no                                      |                                                              |
| Nantes_40 | M      | 61                     | 563      | not available                           |                                                              |
| Nantes_41 | M      | 19                     | 485      | yes                                     |                                                              |
| Nantes_42 | M      | 15                     | 541      | yes                                     |                                                              |
| Nantes_43 | F      | 54                     | 529      | yes                                     |                                                              |
| Nantes_44 | F      | 53                     | 602      | yes                                     |                                                              |
| Nantes_45 | M      | 26                     | 574      | no                                      |                                                              |
| Nantes_46 | F      | 41                     | 611      | yes                                     |                                                              |
| Nantes_47 | F      | 2                      | 483      | no                                      |                                                              |
| Nantes_48 | M      | 35                     | 480      | yes                                     |                                                              |
| Nantes_49 | F      | 18                     | 546      | yes                                     |                                                              |
| Nantes_50 | F      | 49                     | 486      | yes                                     |                                                              |
| Nantes_51 | F      | 42                     | 600      | yes                                     |                                                              |
| Nantes_52 | M      | 15                     | 548      | yes                                     |                                                              |
| Nantes_53 | F      | 30                     | 492      | no                                      |                                                              |
| Nantes_54 | F      | 72                     | 632      | no                                      |                                                              |
| Nantes_55 | F      | 40                     | 646      | not available                           |                                                              |
| Nantes_56 | M      | 2                      | 560      | yes                                     |                                                              |
| Nantes_57 | F      | 34                     | 521      | yes                                     |                                                              |
| Nantes_58 | M      | 14                     | 534      | yes                                     |                                                              |
| Nantes_59 | F      | 69                     | 598      | yes                                     |                                                              |
| Nantes_60 | F      | 15                     | 520      | yes                                     |                                                              |
| Nantes_61 | F      | 35                     | 480      | yes                                     |                                                              |
| Nantes_62 | M      | 64                     | 583      | no                                      |                                                              |
| Nantes_63 | M      | 50                     | 471      | yes                                     |                                                              |
| Nantes_64 | F      | 15                     | 473      | yes                                     |                                                              |
| Nantes_65 | F      | 22                     | 516      | yes                                     |                                                              |
| Nantes_66 | M      | 35                     | 474      | no                                      |                                                              |
| Nantes_67 | F      | 57                     | 539      | no                                      |                                                              |
| Nantes_68 | M      | 9                      | 491      | no                                      |                                                              |
| Nantes_69 | M      | 15                     | 543      | no                                      |                                                              |
| Nantes_70 | F      | 44                     | 561      | yes                                     |                                                              |
| Nantes_71 | F      | 58                     | 475      | no                                      |                                                              |
| Nantes_72 | M      | 26                     | 546      | no                                      |                                                              |
| Nantes_73 | M      | 12                     | 539      | yes                                     |                                                              |
| Nantes_74 | M      | 36                     | 554      | yes                                     |                                                              |
| Nantes_75 | F      | 49                     | 557      | yes                                     |                                                              |
| Nantes_76 | F      | 68                     | 474      | yes                                     |                                                              |
| Nantes_77 | F      | 84                     | 508      | yes                                     |                                                              |
| Nantes_78 | F      | 28                     | 457      | yes                                     | syncope, SCD, TdV/VF, ICD, family history, Schwartz score >3 |
| Nantes_79 | M      | 47                     | 567      | yes                                     |                                                              |
| Nantes_80 | F      | 47                     | 592      | yes                                     |                                                              |
| Nantes_81 | F      | 71                     | 604      | yes                                     |                                                              |
| Nantes_82 | F      | 30                     | 578      | yes                                     |                                                              |
| Nantes_83 | F      | 34                     | 626      | no                                      |                                                              |
| Nantes_84 | F      | 75                     | 555      | yes                                     |                                                              |
| Nantes_85 | F      | 11                     | 503      | yes                                     |                                                              |
| Nantes_86 | F      | 27                     | 605      | yes                                     |                                                              |
| Nantes_87 | F      | 34                     | 518      | yes                                     |                                                              |

|               |   |      |     |     |                                                        |
|---------------|---|------|-----|-----|--------------------------------------------------------|
| Nantes_88     | F | 76   | 621 | no  |                                                        |
| Nantes_89     | F | 29   | 500 | yes |                                                        |
| Nantes_90     | F | 50   | 466 | yes | syncope, SCD, TdV/VF, Schwartz score >3                |
| Nantes_91     | M | 18   | 655 | yes |                                                        |
| UnivLondon_1  | F | 60   | 492 | yes |                                                        |
| UnivLondon_2  | F | 4    | 500 | no  |                                                        |
| UnivLondon_3  | M | 39   | 611 | no  |                                                        |
| UnivLondon_4  | F | 40   | 481 | no  |                                                        |
| UnivLondon_5  | F | 21   | 510 | yes |                                                        |
| UnivLondon_6  | F | 30   | 500 | yes |                                                        |
| UnivLondon_7  | F | 21   | 503 | yes |                                                        |
| UnivLondon_8  | F | 55   | 490 | yes |                                                        |
| UnivLondon_9  | F | 26   | 507 | yes |                                                        |
| UnivLondon_10 | F | 38   | 460 | yes |                                                        |
| UnivLondon_11 | M | 12   | 489 | yes |                                                        |
| UnivLondon_12 | F | 59   | 621 | no  |                                                        |
| UnivLondon_13 | F | 49   | 506 | no  |                                                        |
| UnivLondon_14 | M | 4    | 480 | yes |                                                        |
| UnivLondon_15 | M | 69   | 450 | yes |                                                        |
| UnivLondon_16 | F | 36   | 600 | yes |                                                        |
| UnivLondon_17 | F | 44   | 500 | no  |                                                        |
| UnivLondon_18 | F | 0    | 600 | no  | 0 (Neonate)                                            |
| UnivLondon_19 | F | 21   | 548 | yes |                                                        |
| UnivLondon_20 | F | 55   | 520 | no  |                                                        |
| Toronto_1     | F | 15   | 553 | yes | syncope (also anorexia)                                |
| Toronto_2     | M | 13.5 | 497 | yes | syncope                                                |
| Toronto_3     | F | 13   | 480 | yes | exertional syncope                                     |
| Toronto_4     | F | 0    | 517 |     | bradycardia 2° to 2:1 AV block                         |
| Toronto_5     | F | 0    | 685 |     | bradycardia                                            |
| Toronto_6     | F | 12   | 565 | no  | No                                                     |
| Toronto_7     | F | 14   | 580 | yes | syncope                                                |
| Toronto_8     | M | 7    | 604 | yes | VT following epinephrine for anaphylaxis               |
| Toronto_9     | F | 12.5 | 607 | yes | syncope                                                |
| Toronto_10    | M | 0    | 573 |     | bradycardia                                            |
| Toronto_11    | M | 12   | 565 | yes | exertional syncope                                     |
| Toronto_12    | F | 0    | 623 |     | bradycardia 2° to 2:1 AV block                         |
| Toronto_13    | M | 5    | 698 | yes | syncope (with spont heart block & QT prolongation)     |
| Toronto_14    | M | 13   | 522 |     | palpitations, presyncope                               |
| Toronto_15    | F | 12   | 553 | no  | No                                                     |
| Toronto_16    | F | 14   | 636 | no  | No                                                     |
| Toronto_17    | F | 14   | 501 | yes | syncope                                                |
| Toronto_18    | M | 15   | 502 | yes | syncope                                                |
| Toronto_19    | M | 15   | 566 | yes | sudden cardiac arrest                                  |
| Toronto_20    | F | 8    | 528 | yes | syncope                                                |
| Toronto_21    | F | 0    | 531 |     | bradycardia 2° to 2:1 AV block, methylmalonic acidemia |
| Toronto_22    | M | 5    | 597 | yes | syncope with 'a few breaths of CPR', LVNC              |
| Toronto_23    | M | 9    | 480 |     | presyncope                                             |
| Toronto_24    | M | 6    | 604 |     | torsades' on monitor during meningitis Rx              |
| Pavia_1       | M | 9    | 602 | yes |                                                        |
| Pavia_2       | M | 12   | 569 | no  |                                                        |
| Pavia_3       | M | 23   | 566 | no  |                                                        |
| Pavia_4       | M | 39   | 546 | yes |                                                        |
| Pavia_5       | M | 14   | 516 | no  |                                                        |
| Pavia_6       | F | 20   | 510 | yes |                                                        |
| Pavia_7       | F | 19   | 510 | yes |                                                        |
| Pavia_8       | M | 15   | 509 | no  |                                                        |
| Pavia_9       | M | 14   | 507 | no  |                                                        |
| Pavia_10      | F | 8    | 506 | no  |                                                        |
| Pavia_11      | M | 38   | 500 | no  |                                                        |
| Pavia_12      | M | 9    | 500 | no  |                                                        |
| Pavia_13      | F | 27   | 498 | yes |                                                        |
| Pavia_14      | F | 78   | 498 | yes |                                                        |
| Pavia_15      | F | 44   | 498 | no  |                                                        |
| Pavia_16      | M | 66   | 497 | no  |                                                        |
| Pavia_17      | F | 54   | 496 | yes |                                                        |
| Pavia_18      | M | 26   | 495 | yes |                                                        |
| Pavia_19      | F | 36   | 494 | yes |                                                        |
| Pavia_20      | M | 42   | 494 | no  |                                                        |
| Pavia_21      | M | 17   | 493 | no  |                                                        |
| Pavia_22      | F | 6    | 492 | no  |                                                        |
| Pavia_23      | F | 27   | 490 | no  |                                                        |
| Pavia_24      | F | 51   | 488 | yes |                                                        |
| Pavia_25      | F | 14   | 483 | no  |                                                        |
| Pavia_26      | F | 43   | 482 | no  |                                                        |
| Pavia_27      | F | 34   | 480 | no  |                                                        |
| Pavia_28      | F | 47   | 480 | yes |                                                        |
| Pavia_29      | M | 15   | 490 | no  |                                                        |
| Pavia_30      | M | 21   | 480 | yes |                                                        |
| Pavia_31      | M | 12   | 532 | no  |                                                        |
| Pavia_32      | M | 19   | 506 | no  |                                                        |
| Pavia_33      | M | 13   | 600 | yes |                                                        |
| Pavia_34      | M | 12   | 480 | no  |                                                        |
| Pavia_35      | M | 14   | 500 | no  |                                                        |
| Pavia_36      | F | 0.25 | 482 | no  |                                                        |
| Pavia_37      | M | 12   | 510 | no  |                                                        |
| Pavia_38      | F | 24   | 522 | no  |                                                        |
| Amsterdam_1   | F | 3    | 554 | yes |                                                        |
| Amsterdam_2   | F | 4    | 484 | yes |                                                        |



|              |   |               |     |               |                                              |
|--------------|---|---------------|-----|---------------|----------------------------------------------|
| Amsterdam_3  | M | 13            | 510 | yes           |                                              |
| Amsterdam_4  | M | 9             | 490 | yes           |                                              |
| Amsterdam_5  | F | 56            | 510 | yes           |                                              |
| Amsterdam_6  | F | 36            | 492 | yes           |                                              |
| Amsterdam_7  | M | 39            | 593 | yes           |                                              |
| Amsterdam_8  | F | 65            | 600 | yes           |                                              |
| Amsterdam_9  | F | 32            | 600 | yes           |                                              |
| Amsterdam_10 | M | 26            | 478 | yes           |                                              |
| Amsterdam_11 | M | 11            | 513 | no            |                                              |
| Amsterdam_12 | F | 13            | 486 | yes           | 448 (holter: 486, positive epinephrine test) |
| Amsterdam_13 | F | 51            | 557 | yes           |                                              |
| Amsterdam_14 | M | 9             | 482 | yes           |                                              |
| Amsterdam_15 | M | 14            | 540 | no            |                                              |
| Amsterdam_16 | F | 2             | 460 | yes           |                                              |
| Amsterdam_17 | M | 10            | 460 | yes           | 460 (positive epinephrine test)              |
| Amsterdam_18 | F | 64            | 500 | no            |                                              |
| Amsterdam_19 | F | 32            | 496 | yes           |                                              |
| Amsterdam_20 | F | 1             | 463 | yes           |                                              |
| Amsterdam_21 | F | 43            | 480 | yes           |                                              |
| Amsterdam_22 | F | 71            | 480 | no            |                                              |
| Amsterdam_23 | F | 26            | 510 | yes           |                                              |
| Amsterdam_24 | M | 12            | 490 | no            |                                              |
| Amsterdam_25 | M | 76            | 519 | no            |                                              |
| Amsterdam_26 | M | 0             | 471 | yes           | 471 (total AV-block)                         |
| Amsterdam_27 | M | 1             | 560 | no            |                                              |
| Amsterdam_28 | F | 77            | 503 | yes           |                                              |
| Amsterdam_29 | F | 61            | 630 | no            |                                              |
| Amsterdam_30 | M | 63            | 490 | no            |                                              |
| Mayo_1       | F | not available | 504 | not available |                                              |
| Mayo_2       | F | 18            | 480 | yes           |                                              |
| Mayo_3       | F | 16            | 509 | not available |                                              |
| Mayo_4       | F | 30            | 620 | No            |                                              |
| Mayo_5       | F | 34            | 480 | not available |                                              |
| Mayo_6       | M | 17            | 550 | No            |                                              |
| Mayo_7       | F | 13            | 480 | yes           |                                              |
| Mayo_8       | F | 2             | 570 | no            |                                              |
| Mayo_9       | F | 16            | 480 | not available |                                              |
| Mayo_10      | F | 39            | 499 | not available |                                              |
| Mayo_11      | F | 34            | 480 | yes           |                                              |
| Mayo_12      | F | 59            | 499 | no            |                                              |
| Mayo_13      | M | 22            | 523 | not available |                                              |
| Mayo_14      | F | 12            | 492 | yes           |                                              |
| Mayo_15      | F | 37            | NA  | yes           |                                              |
| Mayo_16      | F | 31            | 660 | yes           |                                              |
| Mayo_17      | M | 11            | 540 | no            |                                              |
| Mayo_18      | F | 14            | 518 | yes           |                                              |
| Mayo_19      | M | 38            | 656 | yes           |                                              |
| Mayo_20      | F | 46            | 493 | yes           |                                              |
| Mayo_21      | F | 13            | 489 | yes           |                                              |
| Mayo_22      | F | 45            | 590 | yes           |                                              |
| Mayo_23      | M | 15            | 480 | yes           |                                              |
| Mayo_24      | F | 50            | 480 | no            |                                              |
| Mayo_25      | M | 7             | 473 | not available | Prolonged QT considering age                 |
| Mayo_26      | F | 21            | 480 | no            |                                              |
| Mayo_27      | F | 28            | 513 | yes           |                                              |
| Mayo_28      | F | 27            | 515 | yes           |                                              |
| Mayo_29      | F | 8             | 480 | no            |                                              |
| Mayo_30      | M | 6             | 520 | no            |                                              |
| Mayo_31      | M | 18            | 510 | yes           |                                              |
| Mayo_32      | M | 26            | 488 | no            |                                              |
| Mayo_33      | F | 29            | 580 | yes           |                                              |
| Mayo_34      | F | 28            | 487 | not available |                                              |
| Mayo_35      | M | 14            | 497 | yes           |                                              |
| Mayo_36      | M | 15            | 540 | no            |                                              |
| Mayo_37      | F | 18            | 486 | yes           |                                              |
| Mayo_38      | M | 1             | 563 | no            |                                              |
| Mayo_39      | M | 14            | 570 | yes           |                                              |
| Mayo_40      | M | 20            | 529 | yes           |                                              |
| Mayo_41      | F | 17            | 558 | yes           |                                              |
| Mayo_42      | F | 15            | 536 | yes           |                                              |
| Mayo_43      | F | 14            | 490 | yes           |                                              |
| Mayo_44      | F | 15            | 498 | yes           |                                              |
| Mayo_45      | F | 17            | 575 | yes           |                                              |
| Mayo_46      | F | 22            | 500 | yes           |                                              |
| Mayo_47      | M | 1             | 510 | no            |                                              |
| Mayo_48      | F | 14            | 520 | no            |                                              |
| Mayo_49      | F | 40            | 501 | no            |                                              |
| Mayo_50      | F | 10            | 456 | yes           |                                              |
| Mayo_51      | F | 34            | 485 | not available |                                              |
| Mayo_52      | F | 42            | 500 | yes           |                                              |
| Mayo_53      | F | 26            | 496 | no            |                                              |
| Mayo_54      | F | 18            | 600 | yes           |                                              |
| Mayo_55      | M | 18            | 480 | not available |                                              |
| Mayo_56      | M | 17            | 499 | no            |                                              |
| Mayo_57      | M | 11            | 535 | yes           |                                              |
| Mayo_58      | F | 13            | 507 | no            |                                              |
| Mayo_59      | F | 27            | 759 | yes           |                                              |
| Mayo_60      | M | 65            | 496 | yes           |                                              |

|           |   |     |     |               |
|-----------|---|-----|-----|---------------|
| Mayo_61   | F | 12  | 480 | yes           |
| Mayo_62   | F | 43  | 565 | yes           |
| Mayo_63   | F | 50  | 475 | not available |
| Mayo_64   | F | 36  | 500 | no            |
| Mayo_65   | F | 51  | 510 | no            |
| Mayo_66   | M | 13  | 503 | not available |
| Mayo_67   | M | 0.1 | 760 | not available |
| Mayo_68   | F | 14  | 527 | not available |
| Mayo_69   | F | 19  | 442 | yes           |
| Mayo_70   | F | 4   | 521 | not available |
| Mayo_71   | M | 1   | 525 | not available |
| Mayo_72   | F | 33  | 474 | yes           |
| Munich_1  | F | 6   | 446 | yes           |
| Munich_2  | F | 46  | 500 | yes           |
| Munich_3  | F | 28  | 470 | yes           |
| Munich_4  | F | 20  | 470 | yes           |
| Munich_5  | F | 9   | 440 | yes           |
| Munich_6  | F | 8   | 440 | yes           |
| Munich_7  | F | 65  | 500 | yes           |
| Munich_8  | F | 25  | 540 | yes           |
| Munich_9  | F | 26  | 460 | yes           |
| Munich_10 | F | 30  | 460 | yes           |
| Munich_11 | F | 14  | 480 | no            |
| Munich_12 | F | 9   | 475 | yes           |
| Munich_13 | M | 1   | 500 | yes           |
| Munich_14 | F | 9   | 467 | yes           |
| Munich_15 | F | 10  | 460 | yes           |
| Munich_16 | F | -   | 500 | not available |
| Munich_17 | F | -   | 507 | no            |
| Munich_18 | F | .   | 490 | no            |
| Munich_19 | F | 27  | 500 | yes           |
| Munich_20 | F | -   | 450 | yes           |
| Munich_21 | M | 8   | 450 | yes           |
| Munich_22 | F | 36  | 440 | yes           |
| Munich_23 | F | 6   | 467 | yes           |

| SNP                               | CHR | POS         | Genes in InWeb High-Confidence Database                                                                              | Genes NOT in InWeb High-Confidence Database                            |
|-----------------------------------|-----|-------------|----------------------------------------------------------------------------------------------------------------------|------------------------------------------------------------------------|
| <b>Previously discovered loci</b> |     |             |                                                                                                                      |                                                                        |
| rs12143842                        | 1   | 160,300,514 | NOS1AP,ATF6,C1orf111,SH2D1B,UHMK1                                                                                    | OLFML2B,C1orf226                                                       |
| rs10919070                        | 1   | 167,365,661 | C1orf114,BLZF1,F5,ATP1B1,NME7,DPT                                                                                    | SLC19A2                                                                |
| rs6793245                         | 3   | 38,574,041  | SCN5A                                                                                                                |                                                                        |
| rs11153730                        | 6   | 118,774,215 | PLN                                                                                                                  | SLC35F1,C6orf204                                                       |
| rs2072413                         | 7   | 150,278,902 | KCNH2                                                                                                                |                                                                        |
| rs7122937                         | 11  | 2,443,126   | KCNQ1                                                                                                                |                                                                        |
| rs735951                          | 16  | 11,601,037  | LITAF,TXNDC11                                                                                                        | SNN                                                                    |
| rs246196                          | 16  | 57,131,754  | CNOT1,SETD6,GINS3                                                                                                    | NDRG4,SLC38A7                                                          |
| rs1052536                         | 17  | 30,355,688  | RAD51L3,RFFL,NLE1,UNC45B,CCT6B,LIG3                                                                                  | ZNF830,FNDC8                                                           |
| rs236586                          | 17  | 65,715,141  | KCNJ2                                                                                                                |                                                                        |
| rs1805128                         | 21  | 34,743,550  | KCNE2,KCNE1                                                                                                          |                                                                        |
| <b>Novel loci</b>                 |     |             |                                                                                                                      |                                                                        |
| rs2298632                         | 1   | 23,583,062  | HNRNPR                                                                                                               | TCEA3,ZNF436,C1orf213,ASAP3                                            |
| rs12997023                        | 2   | 40,606,486  | SLC8A1                                                                                                               |                                                                        |
| rs938291                          | 2   | 174,450,854 | SP3                                                                                                                  |                                                                        |
| rs7561149                         | 2   | 179,398,101 | CCDC141,FKBP7,TTN,PLEKHA3                                                                                            |                                                                        |
| rs295140                          | 2   | 200,868,944 | C2orf47,C2orf69,SGOL2                                                                                                | ENSG00000196141,KCTD18,C2orf60                                         |
| rs17784882                        | 3   | 47,519,007  | CSPG5,PTPN23,SMARCC1,SCAP,KLHL18,MYL3,CCDC12,PTH1R,SET1,TESSP2,NBEAL2,KIF9,C3orf75                                   |                                                                        |
| rs2363719                         | 4   | 72,357,080  | SLC4A4                                                                                                               |                                                                        |
| rs3857067                         | 4   | 95,245,457  | PGDS,SMARCA1                                                                                                         |                                                                        |
| rs10040989                        | 5   | 137,601,624 | CDC25C,BRD8,FAM53C,KIF20A,REEP2,GFRA3,EGR1,CDC23,NME5,ETF1,WNT8A,KDM3B                                               |                                                                        |
| rs7765828                         | 6   | 16,402,701  | GMPR,ATXN1                                                                                                           |                                                                        |
| rs9920                            | 7   | 115,987,328 | CAV1,CAV2                                                                                                            |                                                                        |
| rs16936870                        | 8   | 71,351,896  | NCOA2,TRAM1                                                                                                          | PRDM14,ENSG00000213002                                                 |
| rs11779860                        | 8   | 98,919,506  | MATN2                                                                                                                | LAPTM4B                                                                |
| rs1961102                         | 8   | 104,002,021 | AZIN1                                                                                                                |                                                                        |
| rs2485376                         | 10  | 104,039,996 | CUEDC2,NOLC1,PPRC1,ACTR1A,HPS6,NFKB2,PSD,GBF1,LDB1                                                                   | ELOVL3,PITX3,FBXL15,C10orf95,TMEM180                                   |
| rs174583                          | 11  | 61,366,326  | FADS1,FEN1,DAGLA,RAB31L1                                                                                             | FADS2,C11orf9,ENSG00000124915,ENSG00000214780,C11orf10,ENSG00000221968 |
| rs3026445                         | 12  | 109,207,586 | ANAPC7,ENSG00000139433,RAD9B,PPP1CC,ARPC3,PPTC7,GIT2,TCIF,T81,C12orf34,HVCN1,C12orf76,ENSG00000214159,C12orf24,TCTN1 |                                                                        |
| rs728926                          | 13  | 73,411,123  | KLF12                                                                                                                |                                                                        |
| rs2273905                         | 14  | 102,044,752 | RAGE,CINP,TECPR2                                                                                                     | ZNF839,ANKRD9                                                          |
| rs3105593                         | 15  | 48,632,310  | SPPL2A,USP8,TRPM7                                                                                                    | USP50                                                                  |
| rs1296720                         | 16  | 3,813,643   | TRAP1,CREBBP,DNASE1                                                                                                  |                                                                        |
| rs246185                          | 16  | 14,302,933  | MKL2                                                                                                                 |                                                                        |
| rs9892651                         | 17  | 61,734,255  | APOH,PRKCA                                                                                                           | CCDC46                                                                 |

Supplementary Table 18: Genes at known or novel loci found in the InWeb database. Shown are the genes at previously known or novel loci harboring at least one common variant associated with QT interval with and without data in the InWeb database of protein-protein interactions.

## **Supplementary note**

### **Genetic association study of QT interval highlights role for calcium signaling pathways in myocardial repolarization**

The QT Interval - International GWAS Consortium (QT-IGC)

## **Study cohort description for QT GWAS and replication**

Reported below are general descriptions of the various study cohorts, as well as the method for QT interval measurement and any additional covariates used in association analyses. All participants provided written informed consent and studies were approved by their local research ethics committees or institutional review boards. Mandatory exclusions of individuals included presence of atrial fibrillation or atrial flutter AND (QRS duration >120 msec OR presence of left/right bundle branch block). Optional exclusions included use of digitalis or QT-prolonging medication, presence of a pacemaker or implantable cardioverter defibrillator, or pregnancy. Summary demographic characteristics for all cohorts are provided in Supplementary Table 1. All GWAS studies used genome-wide genotyping arrays and filtered on quality control such as low per sample call rate or low per SNP call rate or deviation from Hardy-Weinberg equilibrium as described in Supplementary Table 2. Replication genotyping was performed on up to 35 SNPs using various platforms as described in Supplementary Table 2.

## **GWAS cohorts**

### **AGES**

The Reykjavik Study cohort originally comprised a random sample of 30,795 men and women born in 1907–1935 and living in Reykjavik in 1967<sup>1</sup>. A total of 19381 attended, resulting in 71% recruitment rate. Between 2002 and 2006, the AGES-Reykjavik study re-examined 5764 survivors of the original cohort who had participated before in the Reykjavik Study. A total of 3,219 randomly selected individuals from the study were genotyped, of which 2,522 were included in analysis for the QT-interval. Association analysis was run with age, sex, and the resting heart beat interval as covariates in a linear model for genetic association. ECG reports were obtained using a Marquette / MAC 5000 Resting ECG (GE Medical Systems, U.S.A. Software Version 006A, PN 2000657-033, Revision A). The QT interval and heart rate corrected QTc are generated by the Marquette 12SL ECG Analysis program, measured across all 12 leads from earliest onset to latest offset.

### **Amish studies**

The Old Order Amish individuals included in this study were participants of several ongoing studies of cardiovascular health carried out at the University of Maryland. Participants were relatively healthy volunteers from the Old Order Amish community of Lancaster County, Pennsylvania and their family members<sup>2,3</sup>. Examinations were conducted at the Amish Research Clinic in Strasburg, PA. The Institutional Review Board at the University of Maryland approved all protocols and informed consent was obtained, including permission to use their DNA for genetic studies. Study participants were enrolled within the 2000-2008 time period. Of the total phenotyped participants, a total of 1420 had ECG measures and genotype information (Affymetrix 500K or 6.0). 12-lead electrocardiograms (ECG) were acquired using standard methods with a GE Marquette digital recording system. The QT measurements were calculated by the Marquette computer system using 12 'median beats' across all 12 leads. The clinical protocol used for Genetic association analysis was performed adjusting for centrally defined covariates and pedigree structure using Mixed models Analysis for Pedigrees and Populations (MMAP) software developed by J. O'Connell (<http://edn.som.umaryland.edu/mmap/index.php>).

## **ARIC**

The ARIC study is a population-based prospective cohort study of cardiovascular disease and includes 15,792 persons aged 45-64 years at baseline (1987-89), chosen by probability sampling from four US communities<sup>4</sup>. Cohort members completed four clinic examinations, conducted approximately three years apart between 1987 and 1998. Clinic examinations for ARIC included assessment of cardiovascular risk factors, self-reported medical family history, employment status, educational status, diet, physical activity, co-morbidity, clinical and laboratory measurements. For assessment of QT interval at baseline, participants were asked not to smoke or ingest caffeine for at least 1 hour prior to the electrocardiogram being obtained. After resting for 5-10 minutes while the electrodes were being placed, a standard supine 12-lead electrocardiogram and a 2-minute paper recording of a three-lead (leads V1, II, and V5) rhythm strip were made. The ECGs were recorded digitally, and identical methods (MAC personal computer, Marquette Electronics, Milwaukee, Wisconsin) were used in all clinical centers. The QT interval from the digital 12-lead ECG was determined by identifying Q-onset and T-wave offset in all three leads. T-wave offset was defined as the point of maximum change of slope as the T-wave merges with the baseline as implemented in the Novacode ECG measurement and classification program as has been described in detail<sup>5</sup> and used in prior ARIC studies of the QT interval<sup>6</sup>. U-waves were not detected by the Novacode algorithm.

## **BLSA**

The Baltimore longitudinal study on Aging (BLSA) study is a population-based study aimed to evaluate contributors of healthy aging in the older population residing predominantly in the Baltimore-Washington DC area<sup>7</sup>. Starting in 1958, participants are examined every one to four years depending on their age. Currently there are approximately 1100 active participants enrolled in the study. Blood samples were collected for DNA extraction, and genome-wide genotyping was completed for 1231 subjects using Illumina 550K. This analysis was done on a subset of the participants (N=477) of European ancestry with ECG data. 12 lead ECGs were recorded with using standard electrode placements using MAC5000. QT interval duration was measured electronically using a Marquette 12SL algorithm. The BLSA has continuing approval from the Institutional Review Board (IRB) of Medstar Research Institute.

## **BRIGHT**

Two thousand unrelated white European hypertensive individuals from the BRIGHT study ([www.brightstudy.ac.uk](http://www.brightstudy.ac.uk)) were genotyped with the GeneChip Human Mapping 500K Array Set (Affymetrix). Twelve-lead ECG recordings (Siemens-Sicard 440; <http://www.brightstudy.ac.uk/info/sop04.html>), which produces an automated measurement of the QT interval, were available for all subjects. All data were transferred from each recruitment centre by electronic modem to electrophysiologists from the West of Scotland Primary Prevention Study (Professor Peter MacFarlane) for central reporting. Thirteen hundred and ninety two individuals remained in the analysis after exclusion of those having ischemic disease, stroke, or bypass, atrial fibrillation, or QRS duration >120 ms and having full covariate information.

## **CARLANTINO**

INGI-Carlantino consisted of 900 subjects who were drawn from Carlantino, an isolated village of southern Italy. Ethics approval was obtained from the Ethics Committee of the "Burlo Garofolo children hospital" in Trieste. Written informed consent was obtained from every participant of the study. The study population had undergone clinical and instrumental evaluations between 1998 and 2005. For all subjects, anthropometrics variables (such as height, weight, etc) were taken and a structured questionnaire about lifestyle and medical history was filled out. In addition, blood pressure and body-mass index were measured. ECG and cardiovascular evaluation was available in 679 subjects. All samples were typed with illumina 370k CNV chip (Illumina, San Diego, USA). Imputation of genotypes was carried out using the software MACH. Digital caliper measurements were made on scanned paper ECGs recorded at 25 mm/sec. Mortara instrument ELI 250 was used to obtain ECG measurements. QT was calculated as length in milliseconds and QTc was with Bazett's correction.

## **CHS**

The CHS is a population-based cohort study of risk factors for coronary heart disease and stroke in adults  $\geq 65$  years conducted across four field centers<sup>8</sup>. The original predominantly European ancestry cohort of 5,201 persons was recruited in 1989-1990 from random samples of the Medicare eligibility lists; subsequently, an additional predominantly African-American cohort of 687 persons were enrolled for a total sample of 5,888. DNA was extracted from blood samples drawn on all participants at their baseline examination in 1989-90. In 2007-2008, genotyping was performed at the General Clinical Research Center's Phenotyping/Genotyping Laboratory at Cedars-Sinai using the Illumina 370CNV BeadChip system on 3980 CHS participants who were free of CVD at baseline, consented to genetic testing, and had DNA available for genotyping. A total of 1908 persons were excluded from the GWAS study sample due to the presence at study baseline of coronary heart disease, congestive heart failure, peripheral vascular disease, valvular heart disease, stroke or transient ischemic attack or lack of available DNA. Because the other cohorts were predominantly white, the African American participants were excluded from this analysis to reduce the possibility of confounding by population structure. The African American participants were analyzed separately as part of the CARE-COGENT analysis of QT interval among African Americans. Participants were excluded if they had a genotyping call rate  $\leq 95\%$ . To date, genotyping has been successful among 3,271 of 3,373 European ancestry participants on whom genotyping was attempted; those with successful genotyping and available ECG data constitute the sample for this study. Data on QT interval and covariates came from the baseline examination. The ECGs were recorded on MAC PC-DT ECG recorder (Marquette Electronics) machines and measurements of QT interval made using the Marquette 12SL algorithm.

## **Croatia – Korcula**

The Croatia-Korcula study is a family-based, cross-sectional study in the isolated island of Korcula. Digital ECGs were recorded using Mortara ELI 350. Genetic association was performed after adjusting for centrally defined covariates. Population stratification was accounted for using the first 3 principal components obtained from the population-specific identity-by-state (IBS) derived distances matrix generated by the "ibs" function of GenABEL and pedigree structure was accounted for the "mmscore" function of GenABEL.

### **Croatia - Split**

The Croatia-Split study is a population-based, cross-sectional study in the Dalmatian City of Split. Digital ECGs were recorded using Mortara ELI 350. Genetic association was performed after adjusting for centrally defined covariates. Population stratification was accounted for using the first 3 principal components obtained from the population-specific identity-by-state (IBS) derived distances matrix generated by the "ibs" function of GenABEL and pedigree structure was accounted for the "mmscore" function of GenABEL.

### **DCCT-EDIC**

The Diabetes Control and Complications Trial (DCCT)/Epidemiology of Diabetes Interventions and Complications (EDIC) study was a clinical trial and follow-up of subjects with type 1 diabetes. Fourteen hundred forty one patients with type 1 diabetes were recruited for the DCCT<sup>9</sup> and followed-up in EDIC<sup>10</sup>. To reduce the possibility of population stratification, we limited the analysis to individuals who self-identified as white, and excluded individuals who were determined to be admixed between Caucasian and other ethnic groups through population genetic approaches, using Eigenstrat seeding with genotype data from the three major populations genotyped in HapMap Phase II. Twelve-lead resting ECGs were obtained by a certified technician or research nurse at 29 clinics, measured digitally and read according to the revised Minnesota Code at the Central ECG Reading Unit (University of Minnesota, under the direction of Dr. Richard S. Crow)<sup>11</sup>. In brief, at least 1 full min of ECG tracing was obtained consisting of 5 s of each of the leads (I, II, III, aVR, aVL, aVF, and V1–V6). Additionally, individuals having ischemic disease, stroke, or bypass, atrial fibrillation, or QRS duration >0.120 ms were excluded, therefore in total 323 individuals were excluded from the analysis.

### **deCODE**

The deCODE Study included all ECGs obtained and digitally stored between 2004 and 2008 at the Landspítali University Hospital, Reykjavik, the largest medical center and only tertiary referral center in Iceland. The ECGs were recorded digitally with the Philips PageWriter Trim III and PageWriter 200 cardiographs and stored in the Philips TraceMasterVue ECG Management System. These ECGs were obtained in all hospital departments, from both inpatients and outpatients. Digitally measured ECG waveforms and parameters were extracted from the database for analysis. The Philips PageWriter Trim III QT interval measurement algorithm has been described previously and shown to fulfill industrial ECG measurement accuracy standards<sup>12</sup>.

### **EMERGE**

The eMERGE (Electronic Medical Records and Genomics) network included 5 sites with DNA repositories linked to electronic medical record (EMR) systems: Group Health Research Institute, Marshfield Clinic, Mayo Clinic, Northwestern University, Vanderbilt University<sup>13</sup>. Each site identified a phenotype of choice, and developed electronic phenotyping algorithms to identify subjects with the target phenotype. Samples from ~3,000 subjects/site were then genotyped at the Center for Genotyping and Analysis at the Broad Institute and the Center for Inherited Disease Research (CIDR) at Johns Hopkins University, and cleaned using the quality control pipeline developed by the eMERGE Genomics Working Group<sup>14</sup>. This study included only individuals of European Americans,



as designated in the EMR, and were genotyped on the Illumina Human660W-Quadv1\_A platform.

The normal electrocardiogram phenotype definition developed at the Vanderbilt site identified individuals from the EMR with normal ECGs and without any cardiac disease or abnormal electrolyte values<sup>15</sup>. The algorithm was validated to a positive predictive value of 97%, and details are available on PheKB (<http://phekb.org/>). Deploying the algorithm across the five eMERGE-1 sites identified 5,272 European Americans (2,488 males and 2,784 females), who are the eMERGE-I set contributed to this meta-analysis<sup>15</sup>.

### **ERF**

The Erasmus Rucphen Family study ([http://www.erasmusmc.nl/klinische\\_genetica/research/genepi/?lang=en](http://www.erasmusmc.nl/klinische_genetica/research/genepi/?lang=en)) is comprised of a family-based cohort embedded in the Genetic Research in Isolated Populations (GRIP) program in the southwest of the Netherlands. The aim of this program is to identify genetic risk factors for the development of complex disorders. In ERF, twenty-two families that had a minimum of six children baptized in the community church between 1850 and 1900 were identified with the help of detailed genealogical records. All living descendants of these couples, and their spouses, were invited to take part in the study. Comprehensive interviews, questionnaires, and examinations were completed at a research center in the area; approximately 3,200 individuals participated. Examinations included 12 lead ECGs, which were recorded on ACTA electrocardiographs (ESAOTE, Florence, Italy) and digital measurements of the QT intervals were made using the Modular ECG Analysis System (MEANS)<sup>16</sup>. Data collection started in June 2002 and was completed in February 2005. In the current analyses, 1481 participants for whom complete phenotypic, genotypic and genealogical information was available were studied.

### **Framingham Heart Study (FHS)**

The Framingham Heart Study (FHS) is a community-based, longitudinal cohort study comprising three generations of individuals in multigenerational pedigrees and additional unrelated individuals. The current study included individuals from generation 1 (eleventh examination)<sup>17</sup>, generation 2 (first examination)<sup>18</sup> and generation 3 (first examination)<sup>19</sup>. Paper ECGs were scanned and digital caliper measurements were made using proprietary software<sup>20</sup>. The QT interval trait analyzed was the average of the lead-specific QT interval (from QRS onset to T-wave offset) in leads II, V2 and V5. Genetic association testing was performed adjusting for centrally defined covariates and additionally dummy variables for generation.

### **FVG**

The INGI-FVG cohort consisted of 1700 subjects drawn from the project "Genetic Park of Friuli Venezia Giulia". This study examined 6 isolated villages in the North-east of Italy between 2008 and 2009. Ethics approval was obtained from the Ethics Committee of the "Burlo Garofolo children hospital" in Trieste. Written informed consent was obtained from every participant of the study. The study population had undergone clinical and instrumental evaluations. For all subjects, anthropometrics variables (such as height, weight, etc) were taken and a structured questionnaire about lifestyle and medical history was filled out. In addition, blood pressure and body-mass index were measured. ECG was available in 1413 subjects. All samples were typed with Illumina 370k CNV chip (Illumina, San Diego, USA). Imputation of genotypes was carried out using the software MACH.

Digital caliper measurements were made on scanned paper ECGs recorded at 25 mm/sec. Mortara instrument ELI 250 was used to obtain ECG measurements. QT was calculated as length in milliseconds and QTc was with Bazett's correction.

### **HEALTH2000**

The Health 2000 study was based on a stratified two-stage cluster sampling from the National Population Register to represent the total Finnish population aged 30 years and over. The survey included an interview on medical history, health-related lifestyle habits, and a clinical examination where a blood sample was drawn. In total, 6,200 persons participated and gave written informed consent. A detailed Methodology Report is available (<http://www.terveys2000.fi/doc/methodologyrep.pdf>). GWAS was performed on participants having metabolic syndrome according to the definition of the International Diabetes Federation, excluding diabetic individuals, and an equal number of controls free of metabolic syndrome and diabetes. After appropriate exclusions, altogether 1,921 persons with GWAS were available for analysis in the QT-IGC. The rest of the Health 2000 participants (n=3,128) was used for targeted replication analyses and genotyped with Sequenom for 35 SNPs. Digital standard resting ECGs were recorded using MAC 5000 electrocardiograph (GE Marquette Medical Systems, Milwaukee, WI, USA) and QT intervals were measured and visually reviewed from median complexes using a custom-made software, as previously described in detail<sup>21</sup>.

### **Health ABC Study**

The Health Aging and Body Composition (Health ABC) Study is a NIA-sponsored cohort study of the factors that contribute to incident disability and the decline in function of healthier older persons, with a particular emphasis on changes in body composition in old age<sup>22</sup>. Between 4/15/97 and 6/5/98 the Health ABC study recruited 3,075 70-79 year old community-dwelling adults (41% African-American), who were initially free of mobility and activities of daily living disability. ECG recordings used in the present study and blood samples used for DNA extraction were performed at the baseline visit from 1997 to 1998. Ten-second, resting, standard 12-lead electrocardiograms were recorded using the Marquette MAC PC (GE Healthcare, Milwaukee, WI, USA). The QT interval was measured electronically using the Marquette 12SL algorithm.

### **Heinz Nixdorf Recall (HNR)**

The Heinz Nixdorf Recall (Risk Factors, Evaluation of Coronary Calcium and Lifestyle, HNR) Study is an ongoing population-based, prospective cohort study of the comparative value of modern risk stratification methods with myocardial infarction and cardiac death being primary endpoints<sup>23</sup>. The study base is the general German population, randomly selected from statutory lists of residence, living in the three adjacent cities of Bochum, Essen and Mülheim in Western Rhine area of Germany. For all participants, standardized digital 12-lead resting surface EKGs were sampled at 250 Hz, recorded on a MAC 5000 EKG recorder (GE Healthcare, Freiburg, Germany), and interpreted automatically using the integrated 12SL-Code<sup>24</sup>.

### **KORA-F3 / KORA-S4**

The KORA Study is a series of population-based epidemiological surveys of persons living in or near the city of Augsburg, Germany. All survey participants are residents of German nationality identified through the registration office and between 25 and 75 years

old at the time of enrollment. Survey S3 was conducted between 1994 and 1995 and survey S4 between 1999 and 2001. KORA F3, a 10-year follow up of S3, occurred in 2004 and 2005. In KORA F3 and S4 12-lead resting ECGs were recorded with digital recording systems (F3: Mortara Portrait, Mortara Inc., Milwaukee, USA, S4: Hörmann Bioset 9000, Hörmann Medizinelektronik, Germany). The Mortara portrait ECG machine determines QT interval by the proprietary XL-ECG algorithm which has not been fully published but has shown to be in good accordance with other published ECG measurement algorithms<sup>25</sup>; QT intervals from Hörmann Bioset were determined using the Hannover ECG analysis software (HES-Version 3.22-12) by computerized analysis of an averaged cycle computed from all leads and all cycles of the 10 second recording after exclusion of ectopic beats as described earlier<sup>26</sup>. The QT interval determined by this algorithm represents the earliest beginning of depolarization until the latest deflection of repolarization between any two leads.

### **LIFELINES**

The LifeLines Cohort Study is a multi-disciplinary prospective population-based cohort study examining in a unique three-generation design the health and health-related behaviors of 165,000 persons living in the North East region of The Netherlands. It employs a broad range of investigative procedures in assessing the biomedical, socio-demographic, behavioral, physical and psychological factors which contribute to the health and disease of the general population, with a special focus on multimorbidity. In addition, the LifeLines project comprises a number of cross-sectional sub-studies, which investigate specific age-related conditions. These include investigations into metabolic and hormonal diseases, including obesity, cardiovascular and renal diseases, pulmonary diseases and allergy, cognitive function and depression, and musculoskeletal conditions. All survey participants are between 18 and 90 years old at the time of enrollment. Recruitment has been going on since the end of 2006, and in August 2010 more than 30,000 participants had been included.

During the screening a 12-lead resting ECG was recorded with digital recording systems (Cardioperfect software, Welch-Allyn, Delft, The Netherlands). All ECGs were processed by the Modular ECG Analysis System (MEANS)<sup>27</sup> to obtain Minnesota Codes<sup>28</sup>. The MEANS program has been validated extensively<sup>29-31</sup>. The first series of whole genome analyses included 3,367 individuals of Caucasian origin, for which we selected the oldest participant of each family who participated in the screening between December 1, 2006 and December 1, 2009.

### **MICROS**

The MICROS study is an ongoing, comprehensive genetic and health care survey conducted in South Tyrol (Italy), from which the present probands were sampled. They were volunteers from three Alpine, isolated, German-speaking villages located in Val Venosta, a region enclosed within the Austria and Switzerland borders<sup>32</sup>. An extensive genealogy spanning 12 generations was constructed and information on participants' health status was collected through a standardized questionnaire and clinical examinations, including digitized ECG measurements (Mortara Portrait, Mortara Inc., Milwaukee, USA). Individuals with identified U-waves were excluded from analysis. The Mortara portrait determines QT interval by a proprietary algorithm<sup>25</sup>.

### **ORCADES**

The Orkney Complex Disease Study (ORCADES) is an ongoing family-based, cross-sectional study in the isolated Scottish archipelago of Orkney. Genetic diversity in this population is decreased compared to Mainland Scotland, consistent with the high levels of endogamy historically. Data for participants aged 18-100 years, from a subgroup of ten islands, were used for this analysis. Fasting blood samples were collected and over 200 health-related phenotypes and environmental exposures were measured in each individual. All participants gave informed consent and the study was approved by Research Ethics Committees in Orkney and Aberdeen. Digital 10-second ECGs were taken after at least 10 minutes of supine rest, using a PC link with QT and RR intervals calculated using CardioView software (NUMED cardiac diagnostics; Sheffield, United Kingdom).

### **PopGen**

DNA samples of 1,204 unrelated individuals were obtained from the PopGen biobank<sup>33</sup>. All individuals had white skin color and were of German descent, i.e. declared that they, their parents and their grandparents were born in Germany. 12-lead resting ECGs were recorded digitally on the General Electric MAC 1600 system (GE Healthcare, Munich, Germany). QT intervals were measured automatically with GE Marquette 12SL ECG analysis program and scrutinized by experienced cardiologists.

### **PREVEND**

The Prevention of Renal and Vascular End stage Disease (PREVEND) study is an ongoing prospective study investigating the natural course of increased levels of urinary albumin excretion and its relation to renal and cardiovascular disease. Inhabitants 28 to 75 years of age (n=85,421) in the city of Groningen, The Netherlands, were asked to complete a short questionnaire, 47% responded, and individuals were then selected with a urinary albumin concentration of at least 10 mg/L (n = 7,768) and a randomly selected control group with a urinary albumin concentration less than 10 mg/L (n = 3,395). Details of the protocol have been described elsewhere ([www.prevend.org](http://www.prevend.org)). Standard 12-lead electrocardiograms were recorded with CardioPerfect equipment (Cardio Control; currently Welch Allyn, Delft, The Netherlands) and digital measurements of the QT intervals were made using the Modular ECG Analysis System (MEANS). The QT detector of MEANS operates on multiple simultaneously recorded leads, which are transformed to a detection function that brings out the QT complexes among the other parts of the signal.

### **Rotterdam Study**

The Erasmus Rotterdam Health Study (RS-I), begun in 1990, is a prospective population-based cohort study of chronic diseases<sup>34,35</sup>. In 2000-2001, additional individuals (RS-II) were recruited into ERGO-II (also known as the Rotterdam Study-II)<sup>36</sup>. The current study sample included data from one of four (RS-I) or two (RS-II) examination cycles at which the first eligible electrocardiogram was available for each individual. In RS, digital measurements of the QT interval were made using the Modular ECG Analysis System (MEANS)<sup>27</sup>.

### **SARDINIA**

The SardiNIA study examined a total of 4,305 related individuals participating in a longitudinal study of aging-related quantitative traits in the Ogliastra province of the Sardinia region, Italy<sup>37</sup>. The SardiNIA GWAS has been described in detail previously<sup>38</sup>. Genotyped individuals had four Sardinian grandparents and were selected without regard

to their phenotypes. QT interval has been measured with a ruler (ECG Machine: Cardiette 600) on the resting ECG tracing: three consecutive beats were considered on lead DII. The QT interval was taken from the beginning of the QRS complex to the end of the downslope of the T wave (crossing of the isoelectric line). When a U wave was present, the QT interval was measured to the nadir of the curve between the T and U waves.

### **SHIP**

The Study of Health in Pomerania (SHIP) is a cross-sectional survey in West Pomerania, the north-east area of Germany<sup>39,40</sup>. A sample from the population aged 20 to 79 years was drawn from population registries. First, the three cities of the region (with 17,076 to 65,977 inhabitants) and the 12 towns (with 1,516 to 3,044 inhabitants) were selected, and then 17 out of 97 smaller towns (with less than 1,500 inhabitants), were drawn at random. Second, from each of the selected communities, subjects were drawn at random, proportional to the population size of each community and stratified by age and gender. Only individuals with German citizenship and main residency in the study area were included. Finally, 7,008 subjects were sampled, with 292 persons of each gender in each of the twelve five-year age strata. In order to minimize drop-outs by migration or death, subjects were selected in two waves. The net sample (without migrated or deceased persons) comprised 6,267 eligible subjects. Selected persons received a maximum of three written invitations. In case of non-response, letters were followed by a phone call or by home visits if contact by phone was not possible. The SHIP population finally comprised 4,308 participants (corresponding to a final response of 68.8%). QT intervals in SHIP were measured from digitally stored 12-lead resting ECGs (Personal 120LD, Esaote, Genova, Italy) using the Modular ECG Analysis System (MEANS)<sup>16</sup>.

### **TWINS UK**

Samples from the TwinsUK cohort were genotyped with the Infinium assay (Illumina, San Diego, USA) across three fully compatible SNP arrays, the Hap300 Duo, Hap300, and Hap550. This resulted in GWAS data being available on 305,912 SNPs for 2,256 individuals from 595 dizygotic (DZ) twin pairs and 1066 singletons (among them twins from monozygotic (MZ) twin pairs) from the TwinsUK cohort. This cohort was shown previously to be representative of the general (singleton) UK population<sup>41</sup>. ECG data were available on 1,104 of these individuals. Eight hundred and sixty had automated measurements of the QT interval by the Cardiofax ECG-9020K (Nihon Kohden UK Ltd., Middlesex, UK) and 244 were scored manually using a high-resolution digitizing board (GTCO CalComp Peripherals, USA). Fifty six individuals were removed from the data set because of atrial fibrillation, QRS duration >120 ms or presence of a heart condition (i.e. ischemic heart disease, stroke or bypass surgery). None of the genotyped twins had a pacemaker or used anti-arrhythmic drugs. The dataset for analyses consequently included 1,048 individuals, of which 588 were DZ twins (i.e. 294 pairs) and 460 singletons. These singletons included 235 MZ twins of which the mean QT interval of both twins was used to optimize information.

### **YOUNGFINNS**

The Cardiovascular Risk in Young Finns (YFS) is a population-based 27 year follow up-study<sup>42</sup>. The first cross-sectional survey was conducted in 1980, when 3,596 Caucasian subjects aged 3-18 years participated. In adulthood, the latest 27-year follow-up study was conducted in 2007 (ages 30-45 years) with 2,204 participants. Genotyping was done

for 2556 samples using custom build Illumina Human 670k BeadChip in 2009 at Wellcome Trust Sanger Institute. Genotypes were called using Illumina's clustering algorithm. Applied QC filters were: sample and SNP call rate < 0.95, MAF < 0.01, HWE-P < 1-e6, possible relatedness ( $\pi$ -hat > 0.2), gender check. After quality control there were 2,442 samples and 546,677 genotyped SNPs available. Genotype imputation was performed using MACH 1.0 and HapMap II CEU (release 22) samples as reference. After imputation there were 2,543,887 imputed SNPs available. In 2001, a single channel ECG was recorded during a 3-minute period. The ECG signal was collected after the participants had remained comfortably in a supine position for at least 15 minutes. The three ECG leads were positioned diagonally as follows: 1) above sternum, 2) below sternum 3) above umbilicus. The resulting QRS complex corresponds to leads V1-V2. All ECG signals were examined visually by one operator. The ECG recordings that included more than two ectopic beats were excluded. The average QT interval duration from the ECG recording was computed using a commercially available program for analysis of physiological data (WinCPRS, Absolute Aliens, Turku, Finland). All ECGs were reviewed visually to ensure that the computer program had correctly recognized Q- and T-waves. In 115 subjects, the computer program did not recognize the correct timing of the Q- or T-waves. In these subjects, the QT interval was computed manually<sup>43</sup>.

## **Replication cohorts**

### **BRHS**

British Regional Heart Study (BRHS): The British Regional Heart Study recruited 7735 men aged 40-59. Full details are reported elsewhere<sup>44</sup>. Men were recruited from 24 medium sized British towns between 1978 and 1980. Twenty years later, when aged 60-79, 4252 participants were re-measured. Of these, 3927 underwent application of 12-lead ECG, and provided a whole blood sample with consent for DNA analysis.

### **BRUNECK**

The Bruneck Study is an ongoing prospective, population-based survey on the epidemiology, pathophysiology and prevention of cardiovascular and cerebrovascular disease. The study protocol was approved by the pertinent ethics committee, and all participants gave their written informed consent. In 1990, 1000 individuals aged 40-79 years were randomly chosen from the inhabitants of the town of Bruneck (South Tyrol, Italy) on the basis of an age- and sex-stratified strategy (125 persons per sex and decade). The population of Bruneck is exclusively Caucasian and of heterogeneous geographic origin with sizeable segments of Austro-German or Italian background. Population mobility within the survey area was low at 0.2% per year. Follow-up examinations were performed in 1995, 2000 and 2005 with participation rates exceeding 90%. Analyses for the current investigation focused on the 1995 evaluation and included 821 men and women with DNA samples available. After exclusion of patients with atrial fibrillation, pacemakers, QRS duration > 120 ms, and QT-shortening or QT-prolonging drugs 629 subjects remained for the current analysis.

### **CARLA**

The CARLA study is an ongoing cohort study of a representative sample of the inhabitants of the city of Halle, eastern Germany, comprising 1,779 participants aged 45-83 years at baseline (812 women, 967 men)<sup>45</sup>. The baseline examination took place between December 2002 and January 2006. A multi-step recruitment strategy aimed to

achieve a high response rate. The final response rate after subtracting exclusions (individuals who were deceased prior to the invitation, had moved away, or were unable to participate due to illness) was 64.1%. The study was approved by the Ethics Committee of Martin-Luther-University Halle-Wittenberg and conforms to the Declaration of Helsinki. A standardized, computer-assisted interview was performed to collect information on socio-demographic and socioeconomic variables, behavioral, biomedical and psychosocial factors, medical history, and use of medication within the preceding 7 days. The medical examination included the recording of sitting blood pressure, sitting and lying heart rate (HR), waist and hip circumference, weight and height, a venous blood sample, an echocardiogram, and a 20-minute 12-lead resting ECG, recorded on a CardioControl Working Station (Welch Allyn, Delft, Netherlands). Digital measurements of the QT interval were made using the Modular ECG Analysis System (MEANS)<sup>27</sup>. Genotyping of the single nucleotide polymorphisms rs174583, rs2273905, rs295140, rs3026445, rs3857067, rs4493911, rs7765828, rs938291, and rs9920 was performed using pre-developed, and custom-made (rs3857067 and rs404321, primer and probe sequence see table) and validated TaqMan® SNP Genotyping Assays (Applied Biosystems, Germany) following the manufacturer's instructions. Polymerase chain reaction conditions were as follows: initial denaturation at 95°C for 10 min, followed by 45 cycles of denaturation (92°C for 15 sec) and annealing and extension in 1 step (60°C for 60 s). The post PCR generated fluorescence intensity was quantified using an ABI 7900 Sequence Detector System Software ® version 2.3 (Applied Biosystems).

### **CYPRUS**

The Cyprus Study is a prospectively designed study on cardiovascular disease in community-dwellers aged 40 or more (40-89). Part I consists of a pilot study of 500 subjects, part II extended this to 1100 subjects and part III will provide a minimum of 5 year follow-up. Baseline data have been collected from Pedoulas, a village in the Troodos Mountains of Cyprus (n=273), their relatives who live in any one of the main towns (n=479) and from a section of Nissou ten kilometers south of the capital, Nicosia (n=245); a total of 997. Inhabitants were identified through the population list held at the Mayor's office. The overall participation rate of those invited was 95%. The Ethics Committee of the Cyprus Institute of Neurology and Genetics approved the study. All participants provided written informed consent. Twelve-lead ECGs were acquired using standard methods with Nihon Kohden 9120K digital recording system. The QT interval was measured electronically using the Nihon Kohden algorithm and verified by independent measurement by a cardiologist.

### **Czech Post-MONICA**

The Czech Post-Monica study in Prague study sample were selected according to the criteria used in the original MONICA (MONItoring of CARdiovascular risk factors) study<sup>46</sup>. The Prague-MONICA sample includes individuals collected in the district Litomerice and Prague-east. Examination by twelve lead ECG recordings was performed using a MAC 5500 (GE Healthcare). The MAC 5500 is designed for high volume ECG environment. The examination was carried out on the supine individuals after 10 minutes of rest.

### **MIDSPAN Family Study**

This is one of the four MIDSPAN population cohort studies based in Scotland. The three original studies took place between 1964 and 1976<sup>47,48</sup>. Twenty years later, in 1996,

the next generation was studied when offspring of couples in the original Renfrew/Paisley Study were recruited into the Family Study. This latter group is the subject of the present analysis. The offspring were ascertained (by self-report) to be from full-sibling families with no step children, adoptees or half-siblings. All were white and living in the west of Scotland. Details of the study have been described previously. Digital ECG data were in all cases transferred to the University of Glasgow ECG Core Laboratory based in Glasgow Royal Infirmary, and the University of Glasgow ECG analysis program analyzed all ECGs<sup>49</sup>. This software meets all of the required specifications in terms of measurement accuracy and is used widely in various commercial products and clinical trials. All ECGs were reviewed manually and checked for technical problems that would have interfered with analysis, and technically unsatisfactory ECGs were excluded. In the MIDSPAN study, which includes related individuals, associations between QT interval and SNP genotype were investigated using linear mixed effects regression models. Family structure among the MIDSPAN offspring generation was accounted for by fitting random intercepts within sibships.

### **Galicia**

The Galicia Study is a series of population-based epidemiological surveys of persons living in Galicia, Northwestern Spain. The cohort includes 911 individuals between 18 and 92 years old at the time of enrollment. For targeted replication analyses 35 SNPs were genotyped with Sequenom Mass Array. Twelve-lead ECGs were acquired using standard methods with GE Marquette digital recording system. The QT interval was measured electronically using the Marquette 12SL algorithm.

### **Health 2000**

Health 2000 was based on a stratified two-stage cluster sampling from the National Population Register to represent the total Finnish population aged 30 years and over. The survey included an interview on medical history, health-related lifestyle habits, and a clinical examination where a blood sample was drawn. In total, 6,200 persons participated and gave written informed consent. A detailed Methodology Report is available (<http://www.terveys2000.fi/doc/methodologyrep.pdf>). GWAS was performed on participants having metabolic syndrome according to the definition of the International Diabetes Federation, excluding diabetic individuals, and an equal number of controls free of metabolic syndrome and diabetes. After appropriate exclusions, altogether 1,921 persons with GWAS were available for analysis in the QT-IGC. The rest of the Health 2000 participants (n=3,128) was used for targeted replication analyses and genotyped with Sequenom for 35 SNPs. Digital standard resting ECGs were recorded using MAC 5000 electrocardiograph (GE Marquette Medical Systems, Milwaukee, WI, USA) and QT intervals were measured and reviewed visually from median complexes using a custom-made software, as previously described in detail<sup>21</sup>.

### **HNR**

The Heinz Nixdorf Recall (Risk Factors, Evaluation of Coronary Calcium and Lifestyle, HNR) Study is an ongoing population-based, prospective cohort study of the comparative value of modern risk stratification methods with myocardial infarction and cardiac death being primary endpoints<sup>23</sup>. The study base is the general German population, randomly selected from statutory lists of residence, living in the three adjacent cities of Bochum, Essen and Mülheim in Western Rhine area of Germany. For all participants, standardized



digital 12-lead resting surface ECGs were sampled at 250 Hz, recorded on a MAC 5000 ECG recorder (GE Healthcare, Freiburg, Germany), and interpreted automatically using the integrated 12SL-Code<sup>24</sup>.

### **INTERGENE**

INTERGENE is a population based research program to assess the INTERplay between GENetic susceptibility and environmental factors for the risk of chronic diseases in western Sweden<sup>50,51</sup>. The survey started in April 2001 and continued until December 2004. Randomly sampled women and men aged 25–74 years and living in the Västra Götaland region at the time of sampling were invited to participate. Of the invited cohort, 3610 (42%) responded and provided data, and were included in the study population. For the purpose of the present study, 153 non-European subjects were excluded, genotyping data were unavailable for a further 597 subjects, and relevant ECG data were missing for 43 additional subjects who had genotyping data, leaving 2817 subjects. After excluding 38 additional subjects with QRS>120 ms, 2779 subjects remained for analysis; 1509 women (54.3%) and 1270 men (45.7%), with mean age 50.6 years. All subjects provided extensive questionnaire information on risk factors, medication and diseases, and were invited for a clinical examination by a team of trained research nurses. This included spirometry, blood sampling for genetic studies, as well as anthropometric and blood pressure measurements. In addition, all participants underwent standard 12-lead ECG registration using either the Megacart R 9657578 or the Megacart RE 9657578 model (Siemens).

### **KORA-F3 / KORA-S4**

The KORA Study is a series of population-based epidemiological surveys of persons living in or near the city of Augsburg, Germany. All survey participants are residents of German nationality identified through the registration office and between 25 and 75 years old at the time of enrollment. Survey S3 was conducted between 1994 and 1995 and survey S4 between 1999 and 2001. KORA F3, a 10-year follow up of S3, occurred in 2004 and 2005. In KORA F3 and S4 12-lead resting ECGs were recorded with digital recording systems (F3: Mortara Portrait, Mortara Inc., Milwaukee, USA, S4: Hörmann Bioset 9000, Hörmann Medizinelektronik, Germany). The Mortara portrait ECG machine determines QT interval by the proprietary XL-ECG algorithm which has not been fully published but has shown to be in good accordance with other published ECG measurement algorithms<sup>25</sup>; QT intervals from Hörmann Bioset were determined using the Hannover EKG analysis software (HES-Version 3.22-12) by computerized analysis of an averaged cycle computed from all leads and all cycles of the 10 second recording after exclusion of ectopic beats as described earlier<sup>26</sup>. The QT interval determined by this algorithm represents the earliest beginning of depolarization until the latest deflection of repolarization between any two leads.

### **PIVUS**

The participants were randomly sampled from all men and women at age 70 living in Uppsala County in 2001 ([www.medsci.uu.se/PIVUS](http://www.medsci.uu.se/PIVUS)). Of the 2025 individuals invited, 1016 participated. The participants underwent a medical examination including a detailed questionnaire on lifestyle and socioeconomic factors, fasting blood sampling, blood pressure measurement and anthropometric measurements, as previously described<sup>52</sup>. Blood and plasma samples have been frozen until analysis, and blood tests performed

include a wide variety of traditional and more recent CVD risk factors, along with DNA extraction. In addition, the extent of subclinical cardiovascular disease has been assessed extensively by echocardiography, carotid sonography, endothelial function and arterial compliance measurements, and whole-body angiography. Cardiovascular morbidity and mortality has been recorded using the Swedish Hospital discharge registry and Cause of death registry. A standard 12-lead ECG was recorded at 50 mm/s and 10 mm/mV and evaluated according to the Minnesota code<sup>53</sup> and in revised form<sup>28</sup> by one experienced physician who was unaware of other data of the subjects.

### **PREVEND**

The Prevention of REnal and Vascular ENd stage Disease (PREVEND) study is an ongoing prospective study investigating the natural course of increased levels of urinary albumin excretion and its relation to renal and cardiovascular disease. Inhabitants 28 to 75 years of age (n=85,421) in the city of Groningen, The Netherlands, were asked to complete a short questionnaire, 47% responded, and individuals were then selected with a urinary albumin concentration of at least 10 mg/L (n = 7,768) and a randomly selected control group with a urinary albumin concentration less than 10 mg/L (n = 3,395). Details of the protocol have been described elsewhere ([www.prevend.org](http://www.prevend.org)). Standard 12-lead electrocardiograms were recorded with CardioPerfect equipment (Cardio Control; currently Welch Allyn, Delft, The Netherlands) and digital measurements of the QT intervals were made using the Modular ECG Analysis System (MEANS). The QT detector of MEANS operates on multiple simultaneously recorded leads, which are transformed to a detection function that brings out the QT complexes among the other parts of the signal.

### **SAPHIR**

The SAPHIR (Salzburg Atherosclerosis Prevention Program in subjects at High Individual Risk) study has been initiated in the year 1999 as a population-based prospective study that investigates genetic and environmental factors contributing to atherosclerotic vascular disease. Study participants were recruited by health screening programs in large companies in and around the city of Salzburg. All study subjects provided informed consent. The study comprises 1770 healthy unrelated subjects (663 females and 1107 males aged 39-67 years). All study participants were of Caucasian origin and were subjected to a comprehensive physical and instrumental examination. All individuals underwent standard 12-lead ECG registration using MAC-1200 ST EKG recorder (GE Healthcare, Freiburg, Germany) and data were interpreted automatically using the GE Marquette 12SL TM ECG Analysis Program (GE Medical systems, Menomonee Falls, WI, USA). Relevant ECG data were missing for 41 subjects.

### **ULSAM**

All men born in 1920 to 1924 who were residents of Uppsala County were invited to participate in a health examination carried out 1970-73 (<http://www.pubcare.uu.se/ULSAM>). Of 2841 men invited, 2322 (82%) participated in the investigation at age fifty<sup>54</sup>. The men were invited to re-examinations at age 60 (n=1860), age 70 (n=1221), age 77 (n=839) and age 82 (n=530), and the data has been annually updated on mortality and in-hospital morbidity using national registers. The data collection in the ULSAM cohort has been focused on CVD risk factors and endpoints, including but not restricted to blood pressure, glucose metabolism, anthropometry, diet, physical activity, socioeconomic factors, and blood tests including a wide variety of traditional and more

recent CVD biomarkers, together with DNA extraction. At age 70, participants also underwent a euglycemic hyperinsulinemic clamp and had muscle biopsies showing capillary density and morphology taken. A standard 12-lead ECG was recorded at 50 mm/s and 10 mm/mV and evaluated according to the Minnesota code<sup>53</sup> and in revised form<sup>28</sup> by one experienced physician who was unaware of other data of the subjects.

### **WHITEHALL II**

The Whitehall II study recruited 10,308 participants (70% men) between 1985 and 1989 from 20 London-based Civil service departments. Clinical measurements are taken every 5 years. Blood samples for DNA were collected in phase 7 (2002–2004) from over 6000 white-European participants. ECG measurements and other phenotype information from phase 7 were used in this study since this phase had the largest number of ECG measurements. Informed consent was obtained from all participants and the study was approved by UK NHS local ethics committees. Standard 12 lead ECGs were recorded on the Burdick Eclipse 850 ECG recorder. Digital ECG data were transferred to the University of Glasgow ECG Core Lab based in Glasgow Royal Infirmary and analysed by the University of Glasgow ECG analysis program<sup>55</sup>. This software meets all of the required specifications in terms of measurement accuracy and is used widely in various commercial products. All ECGs were reviewed manually and checked for technical problems which would have interfered with analysis, e.g. reversed limb lead connections, excessive artefact etc. Technically unsatisfactory ECGs were excluded.

## **QT interval association analyses (GWAS, validation, meta-analysis)**

All studies used hidden Markov model approaches to impute genotypes at unmeasured HapMap SNPs so that a common set of 2.5M SNPs were available across the discovery samples<sup>56</sup>. Cohort-specific genome-wide association analysis was performed after exclusions with mandatory adjustment for age, sex and RR interval. Additional covariates such as principal components, study center or generation were included as available and appropriate for individual cohorts.

## **GWAS data quality control**

Regression results from each cohort were cleaned to remove any poorly behaving SNPs. Monomorphic SNPs and SNPs with betas larger than 100,000 were removed from all results. Additionally, imputation quality score distributions were examined for systemic low imputation quality. Quality control steps were applied to specific summary results if quantile-quantile distributions of SNPs, stratified by minor allele frequency and imputation quality, showed test statistic inflation (Supplementary Table 3). Genomic control was performed on cohort-specific results after QC exclusions.

## **GWAS meta-analysis**

The regression results were meta-analyzed using inverse variance weighted-fixed effects models. Two independent analysts conducted the meta-analysis with two different software packages: MANTEL<sup>20</sup> and METAL<sup>57</sup>. The results of the independent meta-analyses were completely concordant, indicating the robustness of the analysis. Meta-analysis test statistic inflation was low and further genomic control was not performed ( $\lambda=1.076$ ). Significant associations were declared for SNPs with  $P < 5 \times 10^{-8}$ , a threshold reflecting an estimated testing burden of one million independent SNPs in samples of European descent<sup>58</sup>.

To determine top independent SNPs, particularly in those regions that contained more than one statistically significant SNP, we employed an LD-based binning ("clumping") algorithm using the software PLINK<sup>59</sup>. The procedure set a SNP with the most significant  $P$  value as an index SNP. Then any SNP 500kb upstream or downstream of the index SNP (regardless of  $P$  value) is added to a bin if it has a pairwise  $r > 0.05$  to the index SNP for that bin, using LD patterns from the CEU samples in HapMap (release 27). This procedure is then repeated starting with the most significant SNP remaining, until each SNP is clustered into a "clump". Given the liberal LD cutoff ( $r > 0.05$ ) to define a clump of correlated SNPs, index SNPs are in extremely weak LD with each other, determining suggestive independent association signals.

## **Interim validation SNP selection**

At an interim stage at which GWAS results on 48,997 individuals were available from 21 cohorts, a meta-analysis was performed to select SNPs for 1) targeted SNP genotyping in validation samples and 2) nomination for inclusion on the metabochip genotyping array (Voight et al, manuscript submitted). 35 SNPs were selected for targeted genotyping on a variety of single- and low-complexity-multiplex arrays (Supplementary Table 2). SNPs were clumped according to linkage disequilibrium ( $r > 0.05$ , see above) such that only the SNP with the lowest p-value per clump was eligible

for targeted SNP genotyping. SNPs at loci already established to harbor common variants influencing QT interval were not considered for targeted SNP genotyping<sup>20,60</sup>. Up to 35 SNPs (with  $r$  in HapMap CEU to each other and to previously established QT loci) were selected for attempted genotyping in validation cohorts. Cohorts that could only genotype a smaller number of SNPs were asked to preferentially genotype SNPs that were nearly but not yet genome-wide significant, to maximize the power to identify novel loci. In parallel, a SNP previously reported to be associated with QT interval in a GWAS that included its direct genotyping on a custom gene-focused supplementary array (rs1805128 at *KCNE1*)<sup>20</sup> was also selected for genotyping in several of the GWAS cohort samples in which it was poorly imputed.

For the metabochip array content, SNPs were selected for “replication” or “finemapping”. For replication content, the top SNPs were LD pruned such that no SNP had an  $r > 0.20$  to another more significant SNP based on LD in HapMap CEU. The most significant 5,000 replication SNPs were chosen for QT interval, solely on the basis of increasing ascending p-value (Supplementary Table 4). In addition, loci that had genome-wide significant associations were eligible for inclusion in the finemapping content. Finemapping loci were selected to fine map a single association signal (“signal finemapping”), for which SNPs partially correlated to the top SNP at the locus were selected (Supplementary Tables 4 and 5). Additional finemapping loci were selected for “locus finemapping”, largely on the basis of preliminary evidence of  $>1$  independent signal or strong effects on QT interval (which would presumably increase the power to resolve the association signal given finite replication resources), involving testing of SNPs within a defined genomic span regardless of correlation to the top SNP. LD-based pruning was used in both signal finemapping and locus finemapping SNP selection according to loci deemed high (GOLD), medium (SILVER) and lower (BRONZE) priority by the QT-IGC consortium on the basis of biologic interest, strengths of effect and apparent presence of multiple signals of association (Supplementary Tables 4 and 5).

## **Validation genotyping and meta-analysis with GWAS**

To ensure compatibility between the replication data sets and the discovery GWAS data, alleles were aligned to the positive strand of NCBI 35, allele frequencies were examined, and where allele coding was ambiguous (e.g. A/T or C/G SNPs with high MAF), blotting of primers/probes performed to confirm strand assignment. Meta-analysis of discovery GWAS and replication data was run by two independent analysts using MANTEL and METAL, genome-wide significant loci were visualized using regional association plots, and the PLINK clumping algorithm was applied to determine a list of suggestive independent associations.

## **Regional association plots**

Genomic regions containing statistically significant SNPs were visualized using regional association plots that included linkage disequilibrium information for neighboring SNPs within 0.5 Mb of the sentinel SNP, using HapMap 2 CEU samples (release 27) as a reference (Supplementary Figure 2). Because loci were declared significant on the basis of GWAS+replication genotyping, the SNP with the lowest p-value may have a larger sample size than nearby SNPs not selected for replication genotyping. We, therefore, plotted regional association results based on a GWAS-only meta-analysis to ensure a uniform

sample size (although variation in imputation among neighboring SNPs still exists). Some loci therefore show evidence of a SNP with stronger evidence of association in the GWAS-only analysis than the SNP with which genome-wide significance was declared and results presented throughout the manuscript (e.g., the loci including *GFRA3*, *SMARCAD1*, *SP3*, Supplementary Figure 2).

## **Association of QT SNPs in African ancestry cohorts**

The association of 68 independent SNPs was examined in a meta-analysis of QT interval GWAS in 13,105 individuals of African Ancestry as part of the CARE and COGENT consortia<sup>61</sup>. One SNP (rs12930096) was not found in HapMap YRI (and was therefore not imputed), so a proxy was selected (rs8050461). One SNP was filtered due to poor imputation due to very low frequency (rs1805128). QT interval was adjusted for age, sex, and RR interval, along with principal components for axes of genetically-defined ancestry and study site for multi-center cohorts. Effects were compared after ensuring the same coded allele using ACGT coding and coded allele frequency. Significant replication was claimed for SNPs with effects in the same direction as in QT-IGC and with 2-sided  $P < 0.0007$  ( $=0.05/67$ ). Correlation and directional consistency were assessed using Pearson correlation coefficient and reference to a binomial distribution, respectively.

## **Pleiotropic effects of QT SNPs**

### **QT SNP association with heart rate**

The HRGEN consortium included data from 92,355 individuals of European or Indian Asian ancestry drawn from 36 studies<sup>62</sup>. Genotype-phenotype associations of heart rate (on the beats per minute scale) were adjusted for age, age and body mass index, as well as for study-specific covariates when appropriate (eg principal components) in sex- and case-status specific analyses (in samples ascertained for diseases). Summary statistics were meta-analyzed for ~2.55m directly genotyped or imputed SNPs using inverse variance-weighted fixed-effects meta-analysis, applying genomic control at the study and meta-analysis level. We examined 68 SNPs at 35 QT loci (Supplementary Table 4) in the HRGEN dataset (Supplementary Table 10).

### **QT SNP association with QRS duration**

The QRS GWAS consortium included data from 40,407 individuals of European ancestry in whom QRS duration had been measured<sup>63</sup>. Genotype-phenotype associations of QRS duration on the millisecond scale were adjusted for age, sex, height, and body mass index, as well as study-specific covariates. Summary statistics were meta-analyzed for 2.5m directly genotyped or imputed SNPs using inverse variance-weighted fixed-effects meta-analysis, after applying genomic control to study-specific results. We examined 68 SNPs at 35 QT loci (Supplementary Table 4) in the QRS GWAS dataset (Supplementary Table 10).

### **QT SNP association with other traits**

We examined the NHGRI Catalog of Published Genome-Wide Association Studies (<http://www.genome.gov/gwastudies> accessed December 30, 2011)<sup>64</sup>. We used SNAP (<http://www.broadinstitute.org/mpg/snap>) to identify all SNPs in HapMap CEU with  $r > 0.8$  to any of the 68 independent SNPs at 35 QT loci (Supplementary Table 4) in HapMap 2 (release 22), HapMap 3 or 1000 Genomes Pilot 1. We then looked up all SNPs in the NHGRI GWAS catalog and removed all SNPs previously related to QT interval, as well as heart rate or QRS duration as these results are presented elsewhere (Supplementary Table 11).



## **Non-synonymous SNPs**

We used the SNP Annotation and Proxy Search (SNAP)<sup>65</sup> tool to examine the correlation of 35 sentinel SNPs (Table 1) and 68 putatively independent SNPs at 35 QT loci (Supplementary Table 8). We searched HapMap 2 release 22, HapMap 3 release 2 and 1000 Genomes Phase 1 data (all CEU) for any SNP within 500kb of each SNP at  $r > 0.8$  to the target SNP to identify any SNPs that are associated with an amino acid change. Four of the 68 SNPs were missense--rs846111 in *RNF207*; rs1805128 in *KCNE1*; rs1042391 in *GMPR*--or highly correlated to a missense SNP--rs6795970 in *SCN10A* with  $r$  to rs6801957 0.97 (Supplementary Table 8).

## Expression analyses in non-cardiac tissues

For each of the 68 independent SNPs at 35 genome-wide significant QT loci, all proxy SNPs with  $r > 0.8$  were identified in HapMap CEU (releases 21, 22, and HapMap 3 release 2) using SNAP<sup>65</sup>. All sentinel SNPs and their proxies were then searched for in a set of expression SNP (eSNP) results including the following tissues: fresh lymphocytes<sup>66</sup>, fresh leukocytes<sup>67</sup>, leukocyte samples in individuals with Celiac disease<sup>68</sup>, lymphoblastoid cell lines (LCL) derived from asthmatic children<sup>69</sup>, HapMap LCL from 3 populations<sup>70</sup>, a separate study on HapMap CEU LCL<sup>71</sup>, peripheral blood monocytes<sup>72,73</sup>, omental and subcutaneous adipose<sup>74,75</sup>, stomach<sup>75</sup>, and whole blood samples<sup>74,76</sup>, endometrial carcinomas<sup>77</sup>, brain cortex<sup>72,78</sup>, 3 large studies of brain regions including prefrontal cortex, visual cortex and cerebellum (Emilsson, personal communication), liver<sup>75,79,80</sup>, osteoblasts<sup>81</sup>, skin<sup>82</sup> and additional fibroblast, T cell and LCL samples<sup>83</sup>.

A strong expression association signal will be associated with a penumbra of associated nearby SNPs due to partial correlation, which may still have quite low p-values. Thus, the top QT-associated SNP appear significantly associated with expression of a nearby transcript even though a much stronger eSNP association may exist (best eQTL). In Table 1, we show only expression association results for cis transcripts in which 1) the index (top signal) QT SNPs or proxies ( $r > 0.8$  between eSNP and QT index) is an eSNP with  $P < 5 \times 10^{-8}$  in eQTL analysis and 2) the index QT SNP is highly correlated ( $r > 0.8$ ) to the best eSNP at the locus for that transcript. All results, including additionally those with lesser correlation between eSNP and QT SNP or best eSNP and QT SNP, association of transcripts with non-index QT SNP (i.e. additional signals of QT association), or transcript associations with  $P > 5 \times 10^{-8}$  but meeting eQTL study-specific significance thresholds are shown in Supplementary Table 12. There are clear examples where the expression and QT association signals do not coincide, as evidenced by much lower QT association for the best eSNP at the locus, e.g. association of *TRPM7* (eSNP = rs3105593), *c11orf10* (eSNP = rs174556) or *FADS2* (eSNP = rs174556) transcripts, where the GWAS-only QT association (to ensure uniform sample size) for the top eSNP is orders of magnitude less significant than the top QT SNP (Supplementary Table 12).

We sought evidence of enrichment of gene expression in specific cell types among the set of genes in QT-interval associated loci, as has previously been applied to loci associated with autoimmune diseases<sup>84</sup>. We tested for over-representation of QT-associated genes with expression in each individual cell-type in the Novartis mouse-human gene expression atlas (containing 79 specific cell types)<sup>85</sup>, and assessed statistical significance in a permutation-based framework<sup>84</sup>. We found no cell-type to be over-represented among the QT loci at  $p < 0.01$ .

## Expression analyses in cardiac tissue

Samples of cardiac tissue (n=313) were acquired from patients from the Myocardial Applied Genomics Network (MAGNet; [www.med.upenn.edu/magnet](http://www.med.upenn.edu/magnet)). Left ventricular free-wall tissue was harvested at the time of cardiac surgery from subjects with heart failure undergoing transplantation and from unused donor hearts. The heart was perfused with cold cardioplegia prior to cardiectomy to arrest contraction and prevent ischemic damage. Tissue specimens were then obtained and frozen in liquid nitrogen. Genomic DNA was extracted using the Gentra Puregene Tissue Kit (Qiagen, CA) according to manufacturer's instructions. Total RNA was extracted using the miRNeasy Kit (Qiagen) including DNase treatment. RNA concentration and quality was determined using the NanoVue Plus™ spectrophotometer (GE Healthcare) and the Agilent 2100 RNA Nano Chip (Agilent).

DNA samples were genotyped using Affymetrix Genome Wide SNP Array 6.0. We applied quality control (QC) filters to exclude unreliable samples, samples with cryptic relatedness and samples that were not genetically inferred Caucasian. For the analysis reported here, we eliminated SNPs with genotype call rate < 95%, with minor allele frequency (MAF) < 15%, or if there was significant departure from Hardy-Weinberg equilibrium ( $p < 10$ ). A total of 360,046 SNPs passed QC and were available for analysis. To improve cross study comparisons, genotype imputation was performed using the Minimac (v 2012.11.16)<sup>86</sup> program. Imputation results were filtered at an imputation quality threshold of 0.5 and a MAF threshold of 0.15. For imputed genotypes, we used dosage value as genotype. To assess gene expression, RNA was hybridized with Affymetrix Genechip ST1.1 arrays using manufacturer instructions. CEL files were normalized with robust multiarray analysis (RMA) using Bioconductor<sup>87</sup>. To remove potential batch effects, expression values were further adjusted using ComBat<sup>88</sup>.

There were a total of 68 independent QT-interval associated SNPs considered, of which 63 SNPs had data in the LV expression imputed genotype association results (5 SNPs were not well imputed). The 63 SNPs were tested for association with any transcript within 1 Mb. We used the combined genotype and expression data to test whether the 63 QT interval SNPs, considered individually, showed *cis* eQTL association with nearby genes found within the interval +/- 1Mb of each QT interval SNP (total of 1,146 SNP-transcript association tests examined). Our analysis used a joint-effects model that allowed for different strengths of association in comparatively healthy hearts from unused donors versus those with end-stage heart failure. Specifically, we fit linear regression models,  $Y = \text{age} + \text{sex} + \text{study site} + D + \beta_1(g) + \beta_2(g \times D)$ , where  $Y$  is the  $\log_2$  transformed expression level of a given expression trait,  $g$  is the dosage value of the test SNP, and  $D$  is the patient group ( $D = 1$  for heart failure and  $D = 0$  for unused donors). Association between  $Y$  and  $g$  was assessed by testing  $H_0: \beta_1 = \beta_2 = 0$  using a likelihood ratio test. Significance of the test statistic was evaluated by comparing with a Chi-squared distribution with two degrees of freedom. We considered  $P < 4.36 \times 10^{-5}$  (0.05/1,146 tests) to be statistically significant (Table 2). To test whether statistically significant associations were likely to be mediated through the strongest eSNPs in the region, we fit analogous models that conditioned on genotypes for the strongest observed *cis* eSNP for each expression trait. QT interval SNPs that showed substantial attenuation of the strength of association with a specific transcript upon adjustment for the best eSNP for that transcript suggest that the QT association is mediated by influence of the causal variant (not necessarily the SNP identified) on expression of that gene with the following caveats: a) some genetic variants are associated with expression of multiple genes of which the mediator of the QT effect may be a subset of one or more genes, b) some *cis* genes may

have had noisier expression measurements on the array and therefore not been adequately assayed for association. For SNPs that showed minimal attenuation of association in models adjusting for the best eSNP, the myocardial repolarization effect manifest in the QT association is unlikely to be mediated by the association of the best eSNP with expression of that gene.

## **Left Ventricular Enhancer Roadmap Analyses**

Enhancer annotations were generated by integrating combinations of histone modifications obtained from the Roadmap Epigenomics project using ChromHMM<sup>89,90</sup>. We identified SNPs in LD ( $r > 0.8$ ) with each of the 68 QT interval-associated loci using genotype data from the 1000 Genomes Project (CEU population) and computed overlap with ChromHMM-annotated enhancer elements in the left ventricle tissue sample (BC Left Ventricle N41) in the NIH Roadmap Epigenomics Program<sup>91</sup> using the intersectBED command in BEDTools (v2.12.0, Supplementary Table 13). To assess significance of the overlap, we compared the set of SNPs at 68 QT interval-associated loci against 100,000 sets of randomly sampled control SNPs. Control SNPs were chosen from the Affymetrix 660W genotyping array and were matched for size of the LD block ( $\pm 5$  SNPs), minor allele frequency of the lead SNP ( $\pm 0.1$ ) and distance to the nearest gene ( $\pm 25$  kb if outside a gene).

## Gene-set enrichment analysis

We ran MAGENTA (Meta-Analysis Gene-set Enrichment of variaNT Associations, <http://www.broadinstitute.org/mpg/magenta/>) to perform pathway analysis on the results from the QT-IGC meta-analysis of 76,061 individuals. MAGENTA uses meta-analysis results to test for enrichment of genetic associations in predefined sets of related genes. These predefined biological processes and gene sets are drawn from the following databases: Gene Ontology (GO), Ingenuity, Kyoto Encyclopedia of Genes and Genomes (KEGG, versions from 2008 and 2010), and Protein ANalysis THrough Evolutionary Relationships (PANTHER). The chromosome, position, z-score, and p-value for each SNP in the meta-analysis were used as input to MAGENTA. We ranked the results by the 95 percentile gene set enrichment analysis (GSEA) p-values and searched for pathways enriched in our QT interval-associated SNPs.

We sought evidence that genes in QT interval-associated loci are over-represented among knockout mouse models with cardiac phenotypes by a systematic search in the international database resource for the laboratory mouse (MGI-Mouse Genome Informatics; [www.informatics.jax.org](http://www.informatics.jax.org)). Each associated SNP implicates a set of nearby genes. To determine the set of genes, each SNP is assigned to a genomic interval by finding the furthest HapMap2 CEU neighboring SNP within 200 Kb with  $r > 0.5$ . The interval is extended up- and down-stream to the nearest recombination hotspot. All genes overlapping the interval are implicated by the given SNP, and if there are no genes overlapping the interval then the interval is extended further by 250 kb up- and downstream. To test for enrichment, random SNP sets matched to the QT interval-associated SNPs on the number of implicated genes were sampled from a list of 56,890 SNPs in linkage equilibrium covering the whole genome. We generated 100,000 random SNP sets and counted how many times a SNP set implicates at least as many genes of interest as the QT interval-associated SNPs, from which we derived an empirical p-value.

## Variance explained

To determine the proportion of variance explained by the SNPs associated with QT interval, we constructed multivariable regression models. We tested the ability of 35 SNPs (one most strongly associated SNP per locus) and 68 SNPs (including all index SNPs with  $r < 0.05$  based on HapMap CEU to any other index SNP at the 35 loci) to explain variation in the age-, sex- and RR-interval-adjusted QT interval. Because HapMap CEU correlation patterns based on 120 independent chromosomes are somewhat imprecise, correlation among multiple SNPs at a single locus could make a genotype score (weighted by meta-analysis beta estimates) over- or under-count the influence of a locus. We therefore used individual terms in a multivariable regression framework for each SNP's genotype dosage, by which collinearity would effectively downweight partially correlated SNPs. This was applied to the FHS, ARIC and ERGO study samples (Supplementary Table 15).

As an alternate approach we implemented the GWiS method, which aggregates the statistical support for multiple independent effects at a locus using a reference linkage disequilibrium matrix<sup>92</sup>. A locus is defined as the genomic region flanked by the 5' and 3' most genome-wide significant signal, plus 500KB of flanking sequence on each end. For each locus, GWiS uses Bayesian model selection to find the number of independent effects and the SNPs that best tag them, choosing the SNPs that maximize the posterior probability in a greedy search. In each step, the SNP that gives the greatest increase in the posterior probability is added into the model, and this step is repeated until no more SNPs increase the posterior probability. This posterior probability is calculated as the product of three terms: the multivariable regression likelihood term, the Bayesian penalty term for model size, and the multiple testing correction term for the locus size. The first term addresses the collinearity among correlated SNPs and only allows independent association signals into the model. The second term is essentially a regularization term to prevent model over-fitting, such as the L1 norm in Lasso. It has been shown previously that the Bayesian penalty term has much better performance than the L1 norm used in Lasso<sup>92</sup>. The third term gives each locus the same weight to have association signals regardless of its size.

The SNPs selected by the Bayesian model selection are then used in a multivariate linear regression to calculate the variance explained. We modified the original implementation of GWiS to use the meta-analysis results as input. For a single SNP, if the sample size is large, variance explained is approximately  $z^2/N$ , in which  $z$  is the z-score of the SNP and  $N$  is the sample size. For multiple SNPs, however, the summation of  $z^2/N$  of all SNPs is not the total variance explained because SNPs can be correlated. Gram-Schmidt Ortho-normalization provides an iterative procedure to adjust for the correlations among SNPs in the summation. For each iteration, the SNP that has the best z score is selected (denoted as  $m$ ). We then add its explained variance ( $V_m = z_m^2/N$ ) to the total variance explained ( $V = V + V_m$ ) and adjust the z scores of the remaining SNPs using the following update equations

$$\text{cov}(Y, X_i) \leftarrow \text{cov}(Y, X_i) - \text{cov}(X_m, X_i) \frac{\text{cov}(Y, X_m)}{\text{cov}(X_m, X_m)}$$

$$\text{cov}(X_i, X_j) \leftarrow \text{cov}(X_i, X_j) - \text{cov}(X_m, X_i) \frac{\text{cov}(X_j, X_m)}{\text{cov}(X_m, X_m)}$$

$$z_i = \frac{\text{cov}(Y, X_i) \sqrt{N}}{\sqrt{\text{cov}(Y, Y) \text{cov}(X_i, X_i)}},$$

in which  $Y$  is the phenotype,  $X$  is the genotype,  $i$  and  $j$  are the index of the SNPs, and  $\text{cov}()$  is the covariance. The iterations are repeated until all SNPs are added into the total variance explained. Initial inputs to the iterations are the covariance between the phenotype and the SNP genotype, and the LD matrix among all SNPs. The former was calculated from the  $z$  score using

$$\text{cov}(Y, X_i) = z_i \sqrt{\text{cov}(X_i, X_i) \text{cov}(Y, Y) / N},$$

and the latter was pre-calculated using genotypes from the ARIC cohort.

GWIS was applied to the GWAS meta-analysis, forcing in loci which reached genome-wide significance after joint analysis of GWAS and replication results, making use of pairwise SNP  $r$  estimates from the ARIC study. GWIS estimated 60 independent signals of association at the 35 genome-wide significant loci (Supplementary Table 16).



## LQTS cohort mutation analysis

### LQTS cohorts

A cohort of 298 unrelated, LQT1-3 mutation negative patients with LQTS [191 females (64%), average age =  $27 \pm 20$  years, average QTc =  $529 \pm 58$  ms], who satisfied the case inclusion criteria of QTc  $\geq 480$  msec (n = 261, 86%) or Schwartz score<sup>93</sup>  $\geq 3.0$ . (n = 298, 100%), was derived from 7 international congenital LQTS recruitment centers [l'Institut du Thorax, Nantes, France (n = 91), Mayo Clinic, Rochester, Minnesota, United States (n = 72), University of Pavia, Pavia, Italy (n = 38), Academic Medical Centre, Amsterdam, Netherlands (n = 30), The Hospital for Sick Children, Toronto, Ontario, Canada (n = 24), Munich Medical International GmbH, München, Germany (n = 23), and St. George's Hospital, London, England (n = 20)]. Of the 265 patients with a documented clinical history, 175 (66%) were symptomatic with  $\geq 1$  LQTS-related cardiac event (i.e. syncope or cardiac arrest). All study subjects provided written informed consent and protocols were approved by local institutional review boards.

### Candidate gene mutational analysis

Six genes (*ATP2A2*, *CAV1*, *CAV2*, *SLC8A1*, *SRL*, *TRPM7*), derived from 5 genome-wide significant novel loci, were selected for comprehensive open-reading frame/splice-site mutation analysis. These 6 candidate genes were chosen based on nominal statistical significance, proximity to the signal of association, absence of multiple nearby genes in the associated interval, and known cardiac expression or involvement in ion channel macromolecular complexes. All 298 genomic DNA samples were distributed among 5 mutation screening centers: Academic Medical Centre (*SLC8A1*), Mayo Clinic (*TRPM7*), Munich Medical International GmbH (*CAV1/CAV2*), l'Institut du Thorax (*ATP2A2*) and University of Pavia (*SRL*). For each gene, mutational analysis was performed using either direct Sanger-based DNA sequencing of all patient samples or using an intermediate mutation detection platform (i.e. denaturing high performance liquid chromatography [DHPLC]) followed by direct DNA sequencing of only samples showing an aberrant DHPLC elution profile.

To be considered as a potential LQTS-associated mutation, the variant must have disrupted either the open reading frame (i.e., missense, nonsense, insertion/deletion, or frameshift mutations) or the canonical splice site (splice acceptor or splice donor recognition sequences). Hence, single nucleotide substitutions that did not change the open reading frame (i.e., synonymous single nucleotide polymorphisms/variants) and intronic nucleotide substitutions located outside of the canonical splice site recognition sequence were excluded from consideration. Additionally, the candidate mutation must have been absent in at least 400 reference alleles derived from ethnically matched ostensibly healthy controls. The presence or absence of each candidate mutation among the 12,000+ individuals of European, African or Hispanic ancestry that comprise the ExomeChip was also assessed. The ExomeChip design required at least two copies of the alternate allele be observed for inclusion on the array. In addition, the presence of any alternate alleles (including singletons) was determined in the NHLBI-sponsored Exome Sequencing Project, which includes up to 5,379 individuals of European or African ancestry (<http://evs.gs.washington.edu/EVS/>). In-silico analysis of the identified rare variants was performed using Alamut (Interactive Biosoftware), as well as freely available software at SIFT (Sorting Intolerant From Tolerant; <http://sift.jcvi.org/>) and PolyPhen (Polymorphism

Phenotyping; <http://genetics.bwh.harvard.edu/pph/>). UniProtKB entries included Q86TD4 (*SRL*), P32418 (*SLC8A1*), Q96QT4 (*TRPM7*) and P16615 (*ATP2A2*).

# DAPPLE protein-protein interaction analysis

## InWeb database

The protein-protein interaction database we used is called InWeb and is described in Rossin et al. 2011; we briefly summarize that description here<sup>94</sup>. We used a public database of protein-protein interactions described in 2007 by Lage et al<sup>95</sup>. This database contains 428,430 interactions, 169,810 of which are high-confidence interactions across 12,793 proteins. High-confidence is defined by a rigorously tested signal to noise threshold as determined by comparison to well-established interactions. InWeb combines reported protein interactions from MINT, BIND, IntAct, KEGG annotated protein-protein interactions (PPrel), KEGG Enzymes involved in neighboring steps (ECrel), Reactome, and others<sup>96-100</sup>. All human interactions were pooled and interactions in orthologous protein pairs passing a strict threshold for orthology were included. Each interaction was assigned a probabilistic score based on the neighborhood of the interaction, the scale of the experiment in which the interaction was reported and the number of different publications in which the interaction had been cited. The data we used is available at [www.broadinstitute.org/mpg/dapple](http://www.broadinstitute.org/mpg/dapple).

## *In silico* network analysis

We wanted to test whether genes previously reported to be associated with QT-interval variation assembled into a protein-protein interaction network with known Mendelian long-QT syndrome (LQTS) genes and whether the new associations discovered through the QTIGC meta-analysis fell non-randomly into this network. There were 7 loci in total that were associated previously and did not contain a known Mendelian-LQTS gene.

First, we translated the 7 previously published loci into genes as follows. We defined the wingspan of a SNP as the region containing SNPs with  $r > 0.5$  to the associated SNP; this region was then extended to the nearest recombination hotspot as defined by The HapMap Project<sup>101</sup>. We downloaded the Ensembl human gene list from UCSC Genome Browser and collapsed isoforms into single genes<sup>102</sup>. We converted gene IDs from Ensembl to InWeb IDs. A gene's residence in a locus was defined by whether 50kb upstream and 50kb downstream (to include regulatory DNA) of the coding region overlapped the SNP wingspan. We found 43 genes in total, 32 of which participated in high-confidence interactions according to the InWeb database (Supplementary Table 18)<sup>20,60</sup>.

We used a published algorithm called DAPPLE (Disease Association Protein-Protein Link Evaluator) to build and analyze a network of seed genes<sup>94</sup>. We seeded the network with 12 known Mendelian LQTS proteins (KCNQ1, KCNH2, SCN5A, KCNE1, KCNE2, CAV3, SNTA1, KCNJ2, CACNA1C, ANK2, AKAP9, SCN4B) as well as the genes from the 7 previously associated loci. We considered direct connections among the seed proteins as well as indirect connections through other proteins, filtering on connections between proteins from different loci. DAPPLE evaluates the significance of the network and individual proteins within it by comparing it to 10,000 random, matched networks that are generated using a within-degree node-label permutation<sup>94</sup>. It then prioritizes the highest scoring proteins in multi-genic loci according to their propensity to interact with the rest of the network. We found the network to be significantly interconnected (direct connection  $p = 0.0006$ , indirect connection  $p = 0.008$ ) and could prioritize ATP1B1 based on its connections to other proteins (ATP1B1 connected indirectly to 6 LQTS proteins and 1 associated protein), unlike the other proteins in the same locus.

## **Analysis of proteins connecting to the network**

We considered the ability of protein-protein interactions to identify proteins newly associated in the QT-IGC meta-analysis. We translated the novel loci into genes, identifying 124 genes in total, 85 of which were in the InWeb database (**Supplementary Table 18**). We identified 606 other proteins interacting directly with the seeds used as inputs in the described network, 8 (from 5 loci) of which were among the 85 newly associated proteins. Note that to increase coverage, we considered any input seed regardless of its connectivity, except those not prioritized in a multi-genic locus. Using a hypergeometric test (given that the database has 12,793 proteins), this represents an enrichment beyond expectation at  $p=0.029$ . We show this network in Supplemental Figure 3.

For those other proteins that were not among the set of 85 genome-wide significant ones, we tested them for enrichment in association, following the gene-scoring procedure described in Rossin et al. Briefly, we assigned recombination hotspot-bounded linkage-disequilibrium blocks in the genome the maximum Z score in each block. Since the maximum Z score is correlated to the number of SNPs genotyped in that block, we removed this effect via linear regression in R: the original Z score was regressed onto the number of SNPs in the LD block, and the residuals from this regression were used as the corrected association score for each block. Genes were then assigned association scores based on the blocks they overlap.

We scored the other 606 proteins for association and compared their distribution of scores to all scored sub-genome-wide significant proteins in the genome. Via a one-tailed rank-sum test (since our alternative hypothesis is that they are more associated), we identified an enrichment in association at  $P = 0.00012$  in those 606 proteins.

## Description of genes of interest at novel loci associated with QT interval

### Six novel loci coding for calcium handling proteins

- *ATP2A2* – encodes the Ca transporting slow twitch ATPase2 (SERCA2). The SERCA2a isoform from cardiac muscle sarcoplasmic reticulum and the ubiquitously expressed SERCA2b isoform both help to maintain low cytoplasmic Ca concentrations. Serca2 (+/-) heterozygous mice show deficits in relaxation, contractility, and a reduced Ca cycling. Defects in SERCA function have been implicated in a wide array of pathologies including heart failure, diabetes, skin diseases and cardiac hypertension and hypertrophy<sup>103</sup>.
- *SRL* encodes sarcalumenin a Ca-binding protein localized in the sarcoplasmic reticulum (SR) of striated and cardiac muscle<sup>104-106</sup>. SRL physically interacts with SERCA2 enhancing its protein stability, facilitating Ca uptake into the SR and improving Ca cycling in the SR. Knockout mice develop progressive heart failure in response to pressure overload<sup>105</sup>.
- *PRKCA* encodes the protein kinase C alpha that is a fundamental integrator of cardiac contractility. PRKCA senses intracellular Ca and influences the phosphorylation status of phospholamban (PLN), an inhibitor of the sarcoplasmic reticulum Ca ATPase-2 (SERCA-2) pump, thus altering sarcoplasmic reticulum Ca loading and intracellular Ca cycling<sup>107</sup>.
- *CAV1* – encodes caveolin 1, a scaffolding protein of the caveolae plasma membranes found in most cell types. The CAV1 scaffold domain interacts with TRPC1 and IP3R3 to regulate Ca store release-induced Ca entry in endothelial cells<sup>108</sup>. CAV1 has also been shown to physically interact with KCNH2 and to participate in KCNH2 internalization under conditions of low extracellular K<sup>+</sup><sup>109</sup>. Cav1 ablation in mice leads to contractile dysfunction, cardiac hypertrophy and SERCA3 upregulation<sup>110</sup>.
- *TRPM7* encodes the ubiquitous Mg and Ca permeable transient receptor channel melastatin 7 protein with a role in intracellular ion homeostasis. It has an additional serine/threonine protein kinase function, which is essential for its channel function. TRPM7 is involved in adjusting plasma membrane divalent cation fluxes according to the metabolic and mechanical state of the cell<sup>111-115</sup>.
- *SLC8A1*, the solute carrier family 8, encodes the cytoplasmic sodium/calcium exchanger NCX1 responsible for preventing overloading of intracellular Ca stores and maintaining an even Ca balance counteracting the Ca that enters the cardiomyocyte across the sarcolemma. The exchanger is a dominant mechanism in returning the cardiac myocyte to its resting state following excitation. Mice overexpressing NCX1 develop cardiac hypertrophy and heart failure<sup>116</sup>. Since original submission this locus has been reported to be associated with QT interval.

## **Six novel loci containing genes that encode proteins involved in transcription control**

- *TCEA3* encodes the transcription elongation factor A (SII) a protein necessary for efficient RNA polymerase II transcription elongation past template-encoded arresting sites. Upregulation of *TCEA3* has recently been determined to be part of a characteristic molecular signature of hESC derived cardiomyocytes<sup>117</sup>.

- *MKL2* encoding myocardin-like 2, is a strong transcriptional coactivator of promoters containing serum response elements (SRE), the targets of serum response factor (SRF). It has an essential role in cardiovascular development and skeletal myogenic differentiation<sup>118</sup>.

- *SP3* codes for the SP3 zinc finger transcription factor binding to consensus GC- and GT-box regulatory elements in target genes and functions as a bifunctional transcription factor. SP3 participates in the regulation of lipid metabolism in myocardial energy generation and hypertrophy response<sup>119</sup>. SP3 knockout mice develop a set of cardiac malformations leading to death before birth<sup>120</sup>.

- *SMARCAD1* codes for the SWI/SNF-related, matrix-associated actin-dependent regulator of chromatin subfamily a containing DEAD/H box 1 protein. SMARCAD1 is a member of the SNF subfamily of the helicase protein superfamily that binds to transcriptional start sites of many genes involved in transcriptional regulation, most of them transcription factors or histone modifiers<sup>121</sup>.

- *SPATS2L* (LOC26010) encodes the spermatogenesis associated, serine-rich 2-like also known as DNA polymerase-transactivated protein 6 (DNAPT6) with no known function in the heart.

- *CREBBP* encodes the cAMP response element binding (CREB) binding protein<sup>122</sup>. This protein is involved in the transcriptional co-activation of many different transcription factors, and it has intrinsic histone deacetyltransferase activity<sup>123</sup>. Mutations in *CREBBP* cause Rubenstein-Taybi syndrome<sup>124</sup>. Targeted knock in mice with an amino acid substitution in *crebbp* affecting acetyltransferase activity leads to cardiac malformations in heterozygotes<sup>125</sup>.

## **Three novel loci that contain genes that encode proteins involved in other cellular processes**

- *FADS2* encodes the delta(6) fatty acid desaturase which catalyzes biosynthesis of highly unsaturated fatty acids (HUFA) from polyunsaturated fatty acids (PUFA) linoleic and alpha-linolenic acid. The ratio of these fatty acids plays a pivotal role in membrane biology and other biological processes<sup>126</sup>.

- *MATN2* encodes matrilin 2, a member of the von Willebrand factor A domain containing family of extracellular matrix (ECM) proteins involved in the formation of filamentous networks in the extracellular matrices of various tissues. *MATN2* is expressed

in the heart<sup>127</sup> and thought to participate in wound healing and regenerative processes of different tissues<sup>128</sup>

- *LAPTM4B* encodes lysosome-associated transmembrane protein 4-beta, a protein with high expression levels in uterus, heart and skeletal muscle which is up-regulated in various cancers<sup>129</sup>. Its function in the heart is unknown.

## **Structural proteins**

- TTN encodes titin, a sarcomeric protein highly expressed in both cardiac and skeletal muscle. One single molecule of titin spans half a sarcomere from the Z-disc to the M-line<sup>130</sup>. Titin has multiple functions including: stabilizing the myosin filament; maintaining the integrity of the sarcomere; providing elasticity, and altering contractile properties of sarcomere<sup>131</sup>. Mutations in TTN cause familial hypertrophic type 9<sup>132</sup>, dilated type 1G<sup>133,134</sup> and other inherited myopathies and dystrophies<sup>135</sup>.

## **EXTENDED ACKNOWLEDGMENTS**

We gratefully acknowledge all of the participants in the studies. We thank members of our laboratories for their helpful discussion. Support for this work was provided by the following grants:

### **Age, Gene/Environment Susceptibility Study (AGES)**

The AGES study is funded by National Institutes of Health contract N01-AG-12100, the U.S. National Institute on Aging Intramural Research Program, Hjartavernd (the Icelandic Heart Association), and the Althingi (the Icelandic Parliament). Components of the study were also supported by the U.S. National Eye Institute, the U.S. National Institute on Deafness and Other Communication Disorders, and the U.S. National Heart, Lung, and Blood Institute. This work was supported in part by the Intramural Research Program, National Institutes of Health.

### **Amish studies**

We gratefully acknowledge our Amish liaisons, field workers and clinic staff and the extraordinary cooperation and support of the Amish community without which these studies would not have been possible. The Amish studies are supported by grants and contracts from the NIH, including R01 AG18728, R01 HL088119, U01 GM074518, and U01 HL072515, the University of Maryland General Clinical Research Center, grant M01 RR 16500, the Baltimore Veterans Administration Medical Center Geriatrics Research and Education Clinical Center and the Paul Beeson Physician Faculty Scholars in Aging Program. Additional support was provided by the Mid-Atlantic Nutrition Obesity Research Center (P30 DK72488). Construction and maintenance of the Anabaptist Genealogy Database (AGDB) is covered under an IRB-approved protocol at the National Institutes of Health (Dr. Leslie Biesecker, Principal Investigator). We thank our Amish research volunteers for their long-standing partnership in research, and the research staff at the Amish Research Clinic for their hard work and dedication.

### **Atherosclerosis Risk in Communities**

The ARIC study is carried out as a collaborative study supported by National Heart, Lung, and Blood Institute contracts (HHSN268201100005C, HHSN268201100006C, HHSN268201100007C, HHSN268201100008C, HHSN268201100009C, HHSN268201100010C, HHSN268201100011C, and HHSN268201100012C), R01-HL-087641, R01-HL-59367 and R01-HL-086694; National Human Genome Research Institute contract U01-HG-004402; and National Institutes of Health contract HHSN268200625226C. Infrastructure was partly supported by Grant Number UL1-RR-025005, a component of the National Institutes of Health and NIH Roadmap for Medical Research. In addition, we acknowledge support from NHLBI grants R01-HL-86694, R01-HL-054512, and R01-HL-111267, and the Donald W. Reynolds Cardiovascular Clinical Research Center at Johns Hopkins University for genotyping and data analysis relevant to this study.

### **Baltimore Longitudinal Study of Aging**

This study was supported in part by the Intramural Research Program of the NIH, National Institute on Aging. A portion of that support was through a R&D contract with MedStar Research Institute.



## **British Regional Heart Study**

The British Regional Heart Study (BRHS) is a British Heart Foundation research group (current programme grant RG/08/013/25942). DNA extraction was supported in part by British Heart Foundation Senior Research Fellowship award FS05/125.

## **BRIGHT**

This work was supported by the Medical Research Council of Great Britain (grant number G9521010D); and by the British Heart Foundation (grant number PG/02/128). The BRIGHT study is extremely grateful to all the patients who participated in the study and the BRIGHT nursing team. We would also like to thank the Barts Genome Centre staff for their assistance. This work forms part of the translational studies supported by the Barts and Leicester National Institute for Health Research Cardiovascular Biomedical Research Units.

## **BRUNECK**

This work was supported by the 'Pustertaler Verein zur Prävention von Herz- und Hirngefäusserkrankungen', 'Gesundheitsbezirk Bruneck' and 'Assessorat fuer Gesundheit', Province of Bolzano, Italy.

## **Cardiovascular Health Study**

This CHS research was supported by NHLBI contracts HHSN268201200036C, HHSN268200800007C, N01HC55222, N01HC85079, N01HC85080, N01HC85081, N01HC85082, N01HC85083, N01HC85086; and NHLBI grants HL080295, HL087652, HL105756, HL103612, and HL120393 with additional contribution from the National Institute of Neurological Disorders and Stroke (NINDS). Additional support was provided through AG023629 from the National Institute on Aging (NIA). NS was supported by HL088456. A full list of principal CHS investigators and institutions can be found at [CHS-NHLBI.org/](http://CHS-NHLBI.org/). The provision of genotyping data was supported in part by the National Center for Advancing Translational Sciences, CTSI grant UL1TR000124, and the National Institute of Diabetes and Digestive and Kidney Disease Diabetes Research Center (DRC) grant DK063491 to the Southern California Diabetes Endocrinology Research Center. The content is solely the responsibility of the authors and does not necessarily represent the official views of the National Institutes of Health.

## **CARe-COAGENT**

The following four parent studies contributed parent study data, ancillary study data, and DNA samples through the Massachusetts Institute of Technology - Broad Institute (N01-HC-65226) to create the Candidate gene Association Resource (CARe) genotype/phenotype database for wide dissemination to the biomedical research community: Atherosclerosis Risk in Communities (ARIC): The ARIC study is carried out as a collaborative study supported by National Heart, Lung, and Blood Institute contracts to the University of North Carolina at Chapel Hill (N01-HC-55015), Baylor Medical College (N01-HC-55016), University of Mississippi Medical Center (N01-HC-55021), University of Minnesota (N01-HC-55019), Johns Hopkins University (N01-HC-55020), University of Texas, Houston (N01-HC-55022), University of North Carolina, Forsyth County (N01-HC-

55018); Cleveland Family Study (CFS): Case Western Reserve University (NIH HL 46380, M01RR00080); Jackson Heart Study (JHS): Jackson State University (N01-HC-95170), University of Mississippi (N01-HC-95171), Tougaloo College (N01-HC-95172); Multi-Ethnic Study of Atherosclerosis (MESA): University of Washington (N01-HC-95159), Regents of the University of California (N01-HC-95160), Columbia University (N01-HC-95161), Johns Hopkins University (N01-HC-95162, N01-HC-95168), University of Minnesota (N01-HC-95163), Northwestern University (N01-HC-95164), Wake Forest University (N01-HC-95165), University of Vermont (N01-HC-95166), New England Medical Center (N01-HC-95167), Harbor-UCLA Research and Education Institute (N01-HC-95169), Cedars-Sinai Medical Center (R01-HL-071205), University of Virginia (subcontract to R01-HL-071205). The Baltimore Longitudinal Study of Aging (BLSA) was supported in part by the Intramural Research Program of the NIH, National Institute on Aging. A portion of that support was through a R&D contract with MedStar Research Institute. Bogalusa Heart Study (BHS) investigators E.N.S., S.S.M., and N.J.S. were supported in part by NIH/NCRR Grant Number UL1 RR025774 and Scripps Genomic Medicine. The BHS was supported by grants HD-061437 and HD-062783 from the National Institute of Child Health and Human Development, and AG-16592 from the National Institute on Aging. Cardiovascular Health Study (CHS): Cardiovascular Health Study: This CHS research was supported by NHLBI contracts N01-HC-85239, N01-HC-85079 through N01-HC-85086; N01-HC-35129, N01-HC-15103, N01-HC-55222, N01-HC-75150, N01-HC-45133, HHSN268201200036C and NHLBI grants HL080295, HL087652, HL105756, HL085251 with additional contribution from NINDS. Additional support was provided through AG-023629, AG-15928, AG-20098, and AG-027058 from the NIA. See also <http://www.chs-nhlbi.org/pi.htm>. DNA handling and genotyping was supported in part by National Center of Advancing Translational Technologies CTSI grant UL1TR000124, and National Institute of Diabetes and Digestive and Kidney Diseases grant DK063491 to the Southern California Diabetes Endocrinology Research Center. The Health, Aging, and Body Composition Study (Health ABC) was supported by NIA contracts N01AG62101, N01AG62103, and N01AG62106. The genome-wide association study was funded by NIA grant 1R01AG032098-01A1 to Wake Forest University Health Sciences and genotyping services were provided by the Center for Inherited Disease Research (CIDR). CIDR is fully funded through a federal contract from the National Institutes of Health to The Johns Hopkins University, contract number HHSN268200782096C. This research was supported in part by the Intramural Research Program of the NIH, National Institute on Aging. The Healthy Aging in Neighborhoods of Diversity across the Life Span Study (HANDLS) study was in part supported by the intramural research program of the National Institute on Aging and the National Center for Minority Health and Health Disparities, National Institutes of Health. This research was supported by the Intramural Research Program of the NIH, National Institute on Aging and the National Center on Minority Health and Health Disparities (contract # Z01-AG000513 and human subjects protocol # 2009-149). Data analyses for the HANDLS study utilized the high-performance computational capabilities of the Biowulf Linux cluster at the National Institutes of Health, Bethesda, Md. (<http://biowulf.nih.gov>). The Women's Health Initiative (WHI) is funded by the National Heart, Lung, and Blood Institute, National Institutes of Health, U.S. Department of Health and Human Services through contracts N01WH22110, 24152, 32100-2, 32105-6, 32108-9, 32111-13, 32115, 32118-32119, 32122, 42107-26, 42129-32, and 44221. This manuscript was prepared in collaboration with investigators of the WHI, and has been reviewed and/or approved by the Women's Health Initiative (WHI). WHI investigators are listed at

[http://www.whiscience.org/publications/WHI\\_investigators\\_shortlist.pdf](http://www.whiscience.org/publications/WHI_investigators_shortlist.pdf). Funding for WHI SHARe genotyping was provided by NHLBI Contract N02-HL-64278. J.G.S. was supported by the Swedish Heart Lung Foundation. CLA was supported by grant R00-HL-098458 from the National Heart, Lung, and Blood Institute. AMB was supported by grant 5T32CA009330-30 from the National Cancer Institute. This work was funded by in part by grants from the NIH / NIEHS (1-R01-ES017794, Whitsel) and the NIH / NCI (N01-WH-2-2110, North). C.N.-C. was supported by NIH 1R01HL098283, Doris Duke Charitable Foundation Clinical Scientist Development Award and Burroughs Wellcome Fund Career Award for Medical Scientists.

## **Carlantino**

We are very grateful to the municipal administrators for their collaboration on the project and for logistic support. We would like to thank all participants to this study. We thank Laura Esposito and Angela D'Eustacchio for technical support.

## **CARLA**

The CARLA Study was founded by a grant from the Deutsche Forschungsgemeinschaft as part of the Collaborative Research Center 598 "Heart failure in the elderly - cellular mechanisms and therapy" at the Medical Faculty of the Martin-Luther-University Halle-Wittenberg, by a grant of the Wilhelm-Roux Programme of the Martin-Luther-University Halle-Wittenberg; by the by the Ministry of Education and Cultural Affairs of Saxony-Anhalt, and by the Federal Employment Office.

## **Croatia-Korcula**

The CROATIA-Korcula study on the Croatian island of Korcula was supported through the grants from the Medical Research Council UK and the Ministry of Science, Education and Sport of the Republic of Croatia to I.R. (number 108-1080315-0302). We have received funding support from Medical Research Council UK, European framework programme 6 (EUROSPAN), and the Croatian Ministry of Science, Education and Sport ("10001 Dalmatians - the Croatian Biobank"). We would like to acknowledge the invaluable contributions of the recruitment team in Korcula, the administrative teams in Croatia and Edinburgh and the people of Korcula. The SNP genotyping for the Korcula cohort was performed in Helmholtz Zentrum München, Neuherberg, Germany.

## **Croatia-Split**

The Croatia-Split study was supported through the grants from the Medical Research Council UK.;and Ministry of Science, Education and Sport of the Republic of Croatia (number 108-1080315-0302). We have received funding support from Medical Research Council UK, European framework programme 6 (EUROSPAN), and the Croatian Ministry of Science, Education and Sport ("10001 Dalmatians - the Croatian Biobank"). We would like to acknowledge the invaluable contributions of the recruitment team from the Croatian Centre for Global Health, University of Split, the administrative teams in Croatia and Edinburgh and the people of Split. The SNP genotyping for the Split cohort was performed by AROS Applied Biotechnology, Aarhus, Denmark.

## **CYPRUS**

The Cyprus study was supported by a Cyprus Research Promotion Foundation grant (ERYEX/0406/06) and a joint Cyprus Research Promotion Foundation, Ministry of Health, and Cyprus Heart Foundation grant (41/5PE).

## **Czech Post-MONICA**

Supported by MH CZ - DRO („Institute for Clinical and Experimental Medicine – IKEM, IN 00023001“).

## **DAPPLE**

The project described was supported by award Number T32GM007753 from the National Institute of General Medical Sciences. The content is solely the responsibility of the authors and does not necessarily represent the official views of the National Institute of General Medical Sciences or the National Institutes of Health.

## **DCCT/EDIC**

The DCCT/EDIC Research Group is sponsored through research contracts from the National Institute of Diabetes, Endocrinology and Metabolic Diseases of the National Institute of Diabetes and Digestive and Kidney Diseases (NIDDK) and the National Institutes of Health. The Diabetes Control and Complications Trial (DCCT) and its follow-up the Epidemiology of Diabetes Interventions and Complications (EDIC) study were conducted by the DCCT/EDIC Research Group and supported by National Institute of Health grants and contracts and by the General Clinical Research Center Program, NCCR. A.D.P. holds a Canada Research Chair in the Genetics of Complex Diseases. This work has received support from National Institute of Diabetes and Digestive and Kidney Diseases Contract N01-DK-6-2204, National Institute of Diabetes and Digestive and Kidney Diseases Grant R01-DK-077510 and support from the Canadian Network of Centres of Excellence in Mathematics and from Genome Canada through the Ontario Genomics Institute. Clinical data and DNA from the DCCT/EDIC study will be made available through the National Institute of Diabetes and Digestive and Kidney Diseases repository at <https://www.niddkrepository.org/niddk/home.do>. This manuscript was not prepared under the auspices of and does not represent analyses or conclusions of the NIDDK Central Repositories, or the NIH.

## **deCODE**

The research performed at deCODE genetics was partly funded through the European Community's Seventh Framework Programme (FP7/2007-2013), ENGAGE project, grant agreement HEALTH-F4-2007- 201413. The Icelandic study was approved by the Data Protection Commission of Iceland (PV2008010062) and the National Bioethics Committee of Iceland (VSNb2008010033). We gratefully thank all study participants, the research staff at deCODE and all our collaborators for an invaluable contribution to research.

## **eMERGE**

The eMERGE-I network was initiated and funded by the National Human Genome Research Institute, with additional funding from the National Institute of General Medical Sciences, through the following grants: U01-HG-004610 (Group Health Cooperative); U01-HG-004608 (Marshfield Clinic); U01-HG-04599 (Mayo Clinic); U01-HG-004609 (Northwestern University); U01-HG-04603 (Vanderbilt University, also serving as the Administrative Coordinating Center).

## **ERF**

The ERF study was supported by grants from the Netherlands Organization for Scientific Research (NWO; Pioneergrant), Erasmus Medical Center, the Centre for Medical Systems Biology (CMSB), and the Netherlands Kidney Foundation. We are grateful to all patients and their relatives, general practitioners and specialists for their contributions and to P. Veraart for her help in genealogy, Jeannette Vergeer for her supervision of the laboratory work and P. Snijders for his help in data collection.

## **Framingham Heart Study**

The Framingham Heart Study is funded by National Institutes of Health contract N01-HC-25195. The measurement of QT interval in FHS Generations 1 and 2 was supported by an unrestricted grant from Pfizer and was performed by eResearch Technology. The measurement of QT interval in FHS Generation 3 was supported by the National Institutes of Health (HL-080025, PI: Newton-Cheh) and the Doris Duke Charitable Foundation (Clinical Scientist Development Award, PI: Newton-Cheh). This research was conducted using data and resources from the Framingham Heart Study of the National Heart Lung and Blood Institute of the National Institutes of Health and Boston University School of Medicine based on analyses by Framingham Heart Study investigators participating in the SNP Health Association Resource (SHARe) project. This work was supported by the National Heart, Lung and Blood Institute's Framingham Heart Study (Contract No. N01-HC-25195) and its contract with Affymetrix, Inc for genotyping services (Contract N02-HL-6-4278). A portion of this research utilized the Linux Cluster for Genetic Analysis (LinGA-II) funded by the Robert Dawson Evans Endowment of the Department of Medicine at Boston University School of Medicine and Boston Medical Center. C.N.-C. was supported by the Doris Duke Charitable Foundation, the Burroughs Wellcome Fund, the National Institutes of Health (K23HL080025, R01HL098283, R01 HL113933) and institutional support from Massachusetts General Hospital.

## **FVG**

We are very grateful to the municipal administrators for their collaboration on the project and for logistic support. We would like to thank all participants to this study. The study was supported by Regione FVG (L.26.2008). We thank Laura Esposito, Angela D'Eustacchio and Mila Davanzo for technical support.

## **Galicia Study**

We thank the Cardiology section of the Meixoeiro Hospital in Vigo and the Epidemiology and Pharmacology section of the Santiago Hospital Complex for sample recruitment. This research was supported by the Instituto de Salud Carlos III

(EMER07/018; PI10/00851; PI13/01136) and the Xunta de Galicia (08CSA005208PR). This work was also supported by the Fundación Marcelino Botín.

## **Health ABC Study**

This research was supported by NIA contracts N01AG62101, N01AG62103, and N01AG62106. The genome-wide association study was funded by NIA grant 1R01AG032098-01A1 to Wake Forest University Health Sciences and genotyping services were provided by the Center for Inherited Disease Research (CIDR). CIDR is fully funded through a federal contract from the National Institutes of Health to The Johns Hopkins University, contract number HHSN268200782096C. This research was supported in part by the Intramural Research Program of the NIH, National Institute on Aging.

## **Health 2000**

The Health 2000 Study is funded by the National Institute for Health and Welfare (THL), the Finnish Centre for Pensions (ETK), The Social Insurance Institution of Finland (KELA), The Local Government Pensions Institution (KEVA) and other organizations listed on the website of the survey (<http://www.terveys2000.fi>). GWAS genotyping was supported by the Wellcome Trust Sanger Institute. VS was supported by the Academy of Finland (grant numbers 129494 and 139635), KP and LO by the Finnish Foundation for Cardiovascular Research, AM by the Emil Aaltonen Foundation and AML by the Finnish Cultural Foundation. Dr. Kaisa Silander is acknowledged for her help with the genotyping; Heikki Väänänen, LicSc (Tech), and Juhani Dabek, MSc (Tech) are acknowledged for the development of ECG analysis software. KKK was supported by the Sigrid Juselius Foundation and the Helsinki University Central Hospital.

## **Heinz Nixdorf Recall (HNR)**

The Heinz Nixdorf Recall study was funded by the Heinz Nixdorf Foundation (Chairman: M. Nixdorf) and the German Federal Ministry of Education and Research (BMBF). We acknowledge the support of Sarstedt AG & Co. concerning laboratory equipment.

## **Intergene**

Supported by grants from the Västra Götaland County Council, Swedish Research Council for Health, Working Life and Welfare Social Research (ForteEpiLife), Swedish Research Council (Vetenskapsrådet), the Swedish Research Council for Environment, Agricultural Sciences and Spatial Planning (Formas), the Swedish Heart and Heart-Lung Foundation, and AstraZeneca R&D Sweden.

## **KORA F3/S4**

MONICA/KORA is supported by the German Federal Ministry of Education and Research (BMBF), by the Helmholtz Zentrum München and by the State of Bavaria. This work was also supported by grants from the German National Genome Research Network (NGFN) (01GS0499, 01GS0838) and the German Competence Network on AF (AFNET) (01GI0204/N), the Leducq Foundation (07- CVD 03), the LMU Excellence Initiative, the DZHK (German Centre for Cardiovascular Research) and the BMBF-Agence Nationale de la Recherche (01KU0907) to Dr. Käb, from the NGFN (01GR0803) and the BMBF

(01GR0803) to Dr. Pfeufer and the NGFN (01GR0103) to Dr. Meitinger. Dr. Sinner was supported by the German Heart Foundation.

## **LifeLines**

The LifeLines Cohort Study, and generation and management of GWAS genotype data for the LifeLines Cohort Study is supported by the Netherlands Organization of Scientific Research NWO (grant 175.010.2007.006), the Economic Structure Enhancing Fund (FES) of the Dutch government, the Ministry of Economic Affairs, the Ministry of Education, Culture and Science, the Ministry for Health, Welfare and Sports, the Northern Netherlands Collaboration of Provinces (SNN), the Province of Groningen, University Medical Center Groningen, the University of Groningen, Dutch Kidney Foundation and Dutch Diabetes Research Foundation.

We thank Behrooz Alizadeh, Annemieke Boesjes, Marcel Bruinenberg, Noortje Festen, Ilja Nolte, Lude Franke, Pim van der Harst, Mitra Valimohammadi for their help in creating the GWAS database, and Rob Bieringa, Joost Keers, René Oostergo, Rosalie Visser, Judith Vonk for their work related to data-collection and validation. The authors are grateful to the study participants, the staff from the LifeLines Cohort Study and Medical Biobank Northern Netherlands, and the participating general practitioners and pharmacists. LifeLines Scientific Protocol Preparation: Rudolf de Boer, Hans Hillege, Melanie van der Klauw, Gerjan Navis, Hans Ormel, Dirkje Postma, Judith Rosmalen, Joris Slaets, Ronald Stolk, Bruce Wolffenbuttel. LifeLines GWAS Working Group: Behrooz Alizadeh, Marike Boezen, Marcel Bruinenberg, Noortje Festen, Lude Franke, Pim van der Harst, Gerjan Navis, Dirkje Postma, Harold Snieder, Cisca Wijmenga, Bruce Wolffenbuttel.

## **LQTS-Amsterdam**

The group from the AMC, Amsterdam was supported by research grants from the Leducq Foundation (grant 05-CVD), the Center for Translational Molecular Medicine (CTMM-COHFAR) and the Netherlands Heart Institute (ICIN).

## **LQTS-London**

This work and C.D. were funded in part by the British Heart Foundation Special Program Grant No. SP/02/001. E.R.B. is supported by Higher Education Funding Council of England.

## **LQTS-Mayo**

This work was supported in part by the Mayo Clinic Windland Smith Rice Comprehensive Sudden Cardiac Death Program. J.R.G. was supported in part by supported in part by F30-HL106993.

## **LQTS-Nantes**

This work was supported in part by The Leducq Foundation (grant 05-CVD) and DGOS-PHRCI 2007 "Evaluation de la variabilité phénotypique des troubles du rythme cardiaque par puces à ADN dans les syndromes du QT long", CHU de Nantes. We would also like to thank Estelle Baron, Simon Lecointe, Christine Fruchet for their contributions to the project. We thank the Genomic Platform of Nantes (Biogenouest Genomics) for technical support. We are also grateful to the French clinical network against inherited

cardiac arrhythmias, which includes the University Hospitals of Grenoble, Bordeaux, Tours and Rennes. A special thanks to Pr Pierre Simon Jouk and Pr Pascal Defaye.

## **LQTS-Pavia**

This work was supported in part by NIH Grant HL68880 (P.J.S. and L.C.), Telethon Grant GGP09247 (L.C. and P.J.S.), Futuro in ricerca" RBF12I3KA\_002 (LC) and Telethon Grant GGP07016 (P.J.S. and L.C.).

## **LQTS-Toronto**

This work was supported by the Caitlin Elizabeth Morris Memorial Fund of the Hospital for Sick Children Foundation and The Alex Corrance Memorial Fund.

## **MAGNet left ventricle eSNP**

MAGNet acknowledges the funding support of the US National Institutes of Health (R01HL105993).

## **MICROS**

This study was supported by the Ministry of Health of the Autonomous Province of Bolzano and the South Tyrolean Sparkasse Foundation.

## **MIDSPAN Family Study**

The offspring study in MIDSPAN was funded by the Wellcome Trust and the NHS Research and Development Programme. Dr Mark Upton coordinated and led the first phase of the Family Study. Professor Peter McFarlane supervised the processing and analyses of the original ECG data. Carole Hart and Pauline McKinnon have maintained the original and subsequent family study data set. Genotyping was performed at the BHF Glasgow Cardiovascular Research Centre. BHF Special Project Grant SP/08/005/25115 (AFD, SP).

## **ORCADES**

ORCADES was supported by the Scottish Executive Health Department and the Royal Society. DNA extractions were performed at the Wellcome Trust Clinical Research Facility in Edinburgh. We would like to acknowledge the invaluable contributions of Lorraine Anderson and the research nurses in Orkney, the administrative team in Edinburgh and the people of Orkney.

## **PIVUS**

Genotyping was performed by the SNP&SEQ Technology Platform in Uppsala ([www.genotyping.se](http://www.genotyping.se)). We thank Tomas Axelsson, Ann-Christine Wiman and Caisa Pöntinen for their excellent assistance with genotyping. The SNP Technology Platform is supported by Uppsala University, Uppsala University Hospital and the Swedish Research Council for Infrastructures. E.I. is supported by grants from the Swedish Research Council, the Swedish Heart-Lung Foundation, the Swedish Foundation for Strategic Research, and the Royal Swedish Academy of Science.



## **PopGen**

The PopGen study was supported by the German Ministry of Education and Research (BMBF) through the National Genome Research Network (NGFN) and received infrastructure support through the DFG cluster of excellence "Inflammation at Interfaces". Funding was further received from the Deutsche Forschungsgemeinschaft (DFG) grant no. FR 2821/2-1.

## **PREVEND**

PREVEND genetics is supported by the Dutch Kidney Foundation (Grant E033), the National Institutes of Health (grant 2R01LM010098), The Netherlands Organization for Scientific Research (NWO-Groot 175.010.2007.006, NWO VENI grant 916.761.70, ZonMw grant 90700342 and ZonMW grant 90.700.441), the Netherlands Heart Foundation (grant NHS2010B280) and the Dutch Inter University Cardiology Institute Netherlands. Folkert W. Asselbergs was supported by UCL Hospitals NIHR Biomedical Research Centre.

## **Rotterdam Study-I and II**

The Rotterdam Study is supported by the Erasmus Medical Center and Erasmus University Rotterdam; the Netherlands Organization for Scientific Research; the Netherlands Organization for Health Research and Development (ZonMw); the Research Institute for Diseases in the Elderly; The Netherlands Heart Foundation; the Ministry of Education, Culture and Science; the Ministry of Health Welfare and Sports; the European Commission; and the Municipality of Rotterdam. Support for genotyping was provided by the Netherlands Organization for Scientific Research (NWO) (175.010.2005.011, 911.03.012) and Research Institute for Diseases in the Elderly (RIDE). This study was supported by the Netherlands Genomics Initiative (NGI)/Netherlands Organisation for Scientific Research (NWO) project nr. 050-060-810. Support for M.E. was provided by Netherlands Organization for Health Research and Development (ZonMw) [Priority Medicines Elderly 113102005]. O.H.F. works in ErasmusAGE, a center for aging research across the life course funded by Nestlé Nutrition (Nestec Ltd.), Metagenics, Inc., and AXA. Nestlé Nutrition (Nestec Ltd.), Metagenics, Inc., and AXA had no role in the design and conduct of the study; collection, management, analysis, and interpretation of the data; and preparation, review, or approval of the manuscript. We thank Pascal Arp, Mila Jhamai, Dr Michael Moorhouse, Marijn Verkerk and Sander Bervoets for their help in creating the database, Karol Estrada for his help with the analyses and Maxim Struchalin for his contributions to the imputations of the data.

## **SAPHIR**

The SAPHIR study was supported by the grants from the Medizinische Forschungsgesellschaft Salzburg and the Kamilo Eisner Foundation.

## **SardiNIA**

The SardiNIA ("ProgeNIA") team was supported by Contract NO1-AG-1-2109 from the National Institute on Aging and in part by the Intramural Research Program of the NIH, National Institute on Aging. The efforts of G.R.A. were supported in part by contract 263-MA-410953 from the National Institute on Aging to the University of Michigan and by research grants from the National Human Genome Research Institute and the National Heart, Lung, and Blood Institute (to G.R.A.). We thank Monsignore Piseddu, Bishop of

Ogliastro; the Mayors of Lanusei, Ilbono, Arzana, and Elini; the head of the local Public Health Unit ASL4; and the residents of the towns for volunteering and cooperation. In addition, we are grateful to the Mayor and the administration in Lanusei for providing and furnishing the clinic site. We thank the team of physicians and nurses, who carried out the physical examinations and the recruitment personnel who enrolled the volunteers.

## **Study of Health in Pomerania (SHIP)**

SHIP is funded by the Federal Ministry of Education and Research (grants No. 01ZZ9603, 01ZZ0103, and 01ZZ0403), the Ministry of Cultural Affairs as well as the Social Ministry of the Federal State of Mecklenburg-West Pomerania. Genome-wide data have been supported by the Federal Ministry of Education and Research (grant No. 03ZIK012) and a joint grant from Siemens Healthcare, Erlangen, Germany, and by the Federal State of Mecklenburg- West Pomerania. Furthermore, the analyses were supported by the German Centre for Cardiovascular Research (GCCR).

## **TWINS UK**

The study was funded by the Wellcome Trust; European Community's Seventh Framework Programme (FP7/2007-2013). The study also receives support from the National Institute for Health Research (NIHR)- funded BioResource, Clinical Research Facility and Biomedical Research Centre based at Guy's and St Thomas' NHS Foundation Trust in partnership with King's College London. SNP Genotyping was performed by The Wellcome Trust Sanger Institute and National Eye Institute via NIH/CIDR. Analyses were performed on the Genetic Cluster Computer, which is financed by an NWO Medium Investment grant 480-05-003 and by the Faculty of Psychology and Education of the VU University, Amsterdam, The Netherlands. Y.J. is supported by funding from the British Heart Foundation - PG/12/38/29615 and PG/06/094. Genotyping of TwinsUK samples: We thank the staff from the Genotyping Facilities at the Wellcome Trust Sanger Institute for sample preparation, quality control and genotyping led by Leena Peltonen and Panos Deloukas; Le Centre National de Genotypage, France, led by Mark Lathrop, for genotyping; Duke University, North Carolina, USA, led by David Goldstein, for genotyping; and the Finnish Institute of Molecular Medicine, Finnish Genome Center, University of Helsinki, led by Aarno Palotie.

## **ULSAM**

Genotyping was performed by the SNP&SEQ Technology Platform in Uppsala ([www.genotyping.se](http://www.genotyping.se)). We thank Tomas Axelsson, Ann-Christine Wiman and Caisa Pöntinen for their excellent assistance with genotyping. The SNP Technology Platform is supported by Uppsala University, Uppsala University Hospital and the Swedish Research Council for Infrastructures. E.I. is supported by grants from the Swedish Research Council, the Swedish Heart-Lung Foundation, the Swedish Foundation for Strategic Research, and the Royal Swedish Academy of Science.

## **WHITEHALL II**

The WHII study has been supported by grants from the Medical Research Council; British Heart Foundation; Health and Safety Executive; Department of Health; National Heart Lung and Blood Institute [grant number NHLBI: HL36310] and National Institute on

Aging (AG13196), US, NIH; Agency for Health Care Policy Research [grant number HS06516]; and the John D and Catherine T MacArthur Foundation Research Networks on Successful Midlife Development and Socio-economic Status and Health. ADH and MeKu were supported by the BHF [grant numbers PG07/133/24260, BHFP08/008]. MiKi was supported by the MRC (K013351).

## **Young Finns Study**

The Young Finns Study has been financially supported by the Academy of Finland: grants 134309 (Eye), 126925, 121584, 124282, 129378 (Salve), 117787 (Gendi), and 41071 (Skidi), the Social Insurance Institution of Finland, Kuopio, Tampere and Turku University Hospital Medical Funds (grant 9M048 and 9N035 for TeLeht), Juho Vainio Foundation, Paavo Nurmi Foundation, Finnish Foundation of Cardiovascular Research and Finnish Cultural Foundation, Tampere Tuberculosis Foundation and Emil Aaltonen Foundation (T.L). The expert technical assistance in the statistical analyses by Ville Aalto and Irina Lisinen is gratefully acknowledged.

## **Role of the Sponsor**

None of the funding organizations had any role in the design and conduct of the study; collection, management, analysis, and interpretation of the data; or preparation, review, or approval of the manuscript.

## Consortia membership lists

### Membership of the CARE-COGENT QT consortium

As at publication of the African ancestry GWAS, December 2012

J. Gustav Smith, MD, PhD; Christy L. Avery, PhD; Daniel S. Evans, PhD, MPH; Michael A. Nalls, PhD; Yan A. Meng, PhD; Erin N. Smith, PhD; Cameron Palmer, BSc; Toshiko Tanaka, PhD; Reena Mehra, MD; Anne M. Butler, MS; Taylor Young, MA; Sarah G. Buxbaum, PhD; Kathleen F. Kerr, PhD; Gerald S. Berenson, MD; Renate B. Schnabel, MD, PhD; Guo Li, MS; Patrick T. Ellinor, MD, PhD; Jared W. Magnani, MD; Wei Chen, PhD; Joshua C. Bis, PhD; J. David Curb, MD; Wen-Chi Hsueh, PhD; Jerome I. Rotter, MD; Yongmei Liu, MD, PhD; Anne B. Newman, MD, MPH; Marian C. Limacher, MD; Kari E. North, PhD; Alexander P. Reiner, MD; P. Miguel Quibrera, MS; Nicholas J. Schork, PhD; Andrew B. Singleton, PhD; Bruce M. Psaty, MD, PhD; Elsayed Z. Soliman, MD, MSc, MS; Allen J. Solomon, MD; Sathanur R. Srinivasan, PhD; Alvaro Alonso, MD, MPH, PhD; Robert Wallace, MD; Susan Redline, MD, MPH; Zhu-Ming Zhang, MD; Wendy S. Post, MD, MS; Alan B. Zonderman, PhD; Herman A. Taylor, MD, MPH; Sarah S. Murray, PhD; Luigi Ferrucci, PhD; Dan E. Arking, PhD; Michele K. Evans, MD; Ervin R. Fox, MD; Nona Sotoodehnia, MD, MPH; Susan R. Heckbert, MD, PhD; Eric A. Whitsel, MD, MPH; Christopher Newton-Cheh, MD, MPH.

Affiliations: Program in Medical and Population Genetics, Broad Institute of Harvard and Massachusetts Institute of Technology, Cambridge, MA, USA; Department of Cardiology, Lund University, Lund, Sweden; Department of Epidemiology, Gillings School of Global Public Health, University of North Carolina, Chapel Hill, NC, USA; California Pacific Medical Center Research Institute, San Francisco, CA, USA; Laboratory of Neurogenetics, National Institute on Aging, Bethesda, MD, USA; Department of Pediatrics and Rady's Children's Hospital, University of California at San Diego, School of Medicine, La Jolla, CA, USA; Clinical Research Branch, National Institute on Aging, Baltimore, MD, USA; Department of Medicine, Case School of Medicine, Cleveland, Ohio, USA; Jackson Heart Study and Department of Epidemiology and Biostatistics, School of Health Sciences, Jackson State University, Jackson, USA; Department of Biostatistics, School of Public Health, University of Washington, Seattle, Washington, USA; Department of Epidemiology, Tulane University, New Orleans, LA, USA; University Heart Center Hamburg, Clinic for General and Interventional Cardiology, Hamburg, Germany; Cardiovascular Health Research Unit, Department of Medicine, University of Washington, Seattle, WA, USA; Center for Human Genetic Research and Cardiovascular Research Center, Harvard Medical School and Massachusetts General Hospital, Boston, MA, USA; Section of Cardiovascular Medicine, Boston University School of Medicine, Boston and NHLBI's Framingham Heart Study, Framingham, MA, USA; Division of Clinical Epidemiology, Department of Medicine, John A. Burns School of Medicine, University of Hawaii, Honolulu, HI, USA; Department of Medicine, University of California, San Francisco, CA, USA; Medical Genetics Institute, Cedars-Sinai Medical Center, Los Angeles, CA, USA; Department of Epidemiology and Prevention, Division of Public Health Sciences, Wake Forest University, Winston-Salem, NC, USA; Department of Epidemiology, Graduate School of Public Health, University of Pittsburgh, Pittsburgh, PA, USA; Division of Cardiovascular Medicine, University of Florida, Gainesville, FL, USA; Department of Epidemiology, University of Washington School of Public Health, Seattle, WA, USA; Division of Public Health Sciences, Fred Hutchinson Cancer Research Center, Seattle, WA, USA; The Scripps Translational Science Institute and The Scripps Research Institute, La Jolla, CA, USA; Group Health Research Institute, Group Health Cooperative, Seattle, WA, USA; Departments of Medicine, Epidemiology and Health Services, University of Washington, Seattle, WA, USA; Department of Epidemiology & Prevention, Wake Forest University, Winston Salem, NC, USA; Department of Cardiology, George Washington University, Washington, D.C., USA; Division of Epidemiology and Community Health, School of Public Health, University of Minnesota, Minneapolis, MN, USA; Department of Epidemiology, University of Iowa, Iowa City, IA, USA;

Divisions of Sleep Medicine and Pulmonary Medicine, Department of Medicine, Harvard Medical School; Department of Medicine, Johns Hopkins University, Baltimore, MD, USA; Laboratory of Personality and Cognition, National Institute on Aging, National Institutes of Health, Baltimore, MD, USA; Department of Medicine, Division of Cardiovascular Disease, University of Mississippi Medical Center, Jackson Heart Study, Jackson, MI, USA; Clinical Research Branch, National Institute on Aging, National Institutes of Health, Baltimore, MD, USA; McKusick-Nathans Institute of Genetic Medicine, Johns Hopkins University School of Medicine, Baltimore, MD, USA; Division of Cardiology, University of Washington, Seattle, WA, USA; Department of Medicine, Gillings School of Global Public Health, University of North Carolina, Chapel Hill, NC, USA.

## Membership of the HRGEN consortium

As at publication of the heart rate GWAS, June 2013

Marcel den Hoed, Mark Eijgelsheim, Tõnu Esko, Bianca JJM Brundel, David S Peal, David M Evans, Ilja M Nolte, Ayellet V Segrè, Hilma Holm, Robert E Handsaker, Harm-Jan Westra, Toby Johnson, Aaron Isaacs, Jian Yang, Alicia Lundby, Jing Hua Zhao, Young Jin Kim, Min Jin Go, Peter Almgren, Murielle Bochud, Gabrielle Boucher, Marilyn C Cornelis, Daniel Gudbjartsson, David Hadley, Pim van der Harst, Caroline Hayward, Martin den Heijer, Wilmar Igl, Anne U Jackson, Zoltán Kutalik, Jian'an Luan, John P Kemp, Kati Kristiansson, Claes Ladenvall, Mattias Lorentzon, May E Montasser, Omer T Njajou, Paul F O'Reilly, Sandosh Padmanabhan, Beate St Pourcain, Tuomo Rankinen, Perttu Salo, Toshiko Tanaka, Nicholas J Timpson, Veronique Vitart, Lindsay Waite, William Wheeler, Weihua Zhang, Harmen HM Draisma, Mary F Feitosa, Kathleen F Kerr, Penelope A Lind, Evelin Mihailov, N Charlotte Onland-Moret, Ci Song, Michael N Weedon, Weijia Xie, Loic Yengo, Devin Absher, Christine M Albert, Alvaro Alonso, Dan E Arking, Paul IW de Bakker, Beverley Balkau, Cristina Barlassina, Paola Benaglio, Joshua C Bis, Nabila Bouatia-Naji, Søren Brage, Stephen J Chanock, Peter S Chines, Mina Chung, Dawood Darbar, Christian Dina, Marcus Dörr, Paul Elliott, Stephan B Felix, Krista Fischer, Christian Fuchsberger, Eco JC de Geus, Philippe Goyette, Vilmundur Gudnason, Tamara B Harris, Anna-Liisa Hartikainen, Aki S Havulinna, Susan R Heckbert, Andrew A Hicks, Albert Hofman, Suzanne Holewijn, Femke Hoogstra-Berends, Jouke-Jan Hottenga, Majken K Jensen, Åsa Johansson, Juhani Juntila, Stefan Kääb, Bart Kanon, Shamika Ketkar, Kay-Tee Khaw, Joshua W Knowles, Angrad S Kooner, Jan A Kors, Meena Kumari, Lili Milani, Päivi Laiho, Edward G Lakatta, Claudia Langenberg, Maarten Leusink, Yongmei Liu, Robert N Luben, Kathryn L Lunetta, Stacey N Lynch, Marcello RP Markus, Pedro Marques-Vidal, Irene Mateo Leach, Wendy L McArdle, Steven A McCarroll, Sarah E Medland, Kathryn A Miller, Grant W Montgomery, Alanna C Morrison, Martina Müller-Nurasyid, Pau Navarro, Mari Nelis, Jeffrey R O'Connell, Christopher J O'Donnell, Ken K Ong, Anne B Newman, Annette Peters, Ozren Polasek, Anneli Pouta, Peter P Pramstaller, Bruce M Psaty, Dabeeru C Rao, Susan M Ring, Elizabeth J Rossin, Diana Rudan, Serena Sanna, Robert A Scott, Jaban S Sehmi, Stephen Sharp, Jordan T Shin, Andrew B Singleton, Albert V Smith, Nicole Soranzo, Tim D Spector, Chip Stewart, Heather M Stringham, Kirill V Tarasov, André G Uitterlinden, Liesbeth Vandenput, Shih-Jen Hwang, John B Whitfield, Cisca Wijmenga, Sarah H Wild, Gonke Willemsen, James F Wilson, Jacqueline CM Witteman, Andrew Wong, Quenna Wong, Yalda Jamshidi, Paavo Zitting, Jolanda MA Boer, Dorret I Boomsma, Ingrid B Borecki, Cornelia M van Duijn, Ulf Ekelund, Nita G Forouhi, Philippe Froguel, Aroon Hingorani, Erik Ingelsson, Mika Kivimäki, Richard A Kronmal, Diana Kuh, Lars Lind, Nicholas G Martin, Ben A Oostra, Nancy L Pedersen, Thomas Quertermous, Jerome I Rotter, Yvonne T van der Schouw, WM Monique Verschuren, Mark Walker, Demetrius Albanes, David O Arnar, Themistocles L Assimes, Stefania Bandinelli, Michael Boehnke, Rudolf A de Boer, Claude Bouchard, Mark Caulfield, John C Chambers, Gary Curhan, Daniele Cusi, Johan Eriksson, Luigi Ferrucci, Wiek H van Gilst, Nicola Glorioso, Jacqueline de Graaf, Leif Groop, Ulf Gyllenstein, Wen-Chi Hsueh, Frank B Hu, Heikki V Huikuri, David J Hunter, Carlos Iribarren, Bo Isomaa, Marjo-Riitta Jarvelin, Antti Jula, Mika Kähönen, Lambertus A Kiemeneij, Melanie M van der Klauw, Jaspal S Kooner, Peter Kraft, Licia Iacoviello, Terho Lehtimäki, Marja-Liisa L Lokki, Braxton D Mitchell, Gerjan Navis, Markku S Nieminen, Claes Ohlsson, Neil R Poulter, Lu Qi, Olli T Raitakari, Eric B Rimm, John D Rioux, Federica Rizzi, Igor Rudan, Veikko Salomaa, Peter S Sever, Denis C Shields, Alan R Shuldiner, Juha Sinisalo, Alice V Stanton, Ronald P Stolk, David P Strachan, Jean-Claude Tardif, Unnur Thorsteinsdóttir, Jaako Tuomilehto, Dirk J van Veldhuisen, Jarmo Virtamo, Jorma Viikari, Peter Vollenweider, Gérard Waeber, Elisabeth Widen, Yoon Shin Cho, Jesper V Olsen, Peter M Visscher, Cristen Willer, Lude Franke, Global BPgen consortium, CARDIoGRAM consortium, Jeanette Erdmann, John R Thompson, PR GWAS consortium, Arne Pfeufer, QRS GWAS consortium, Nona Sotoodehnia, QT-IGC consortium, Christopher Newton-Cheh, CHARGE-AF consortium, Patrick T Ellinor, Bruno HCh Stricker, Andres Metspalu, Markus Perola, Jacques S Beckmann, George Davey

Smith, Kari Stefansson, Nicholas J Wareham, Patricia B Munroe, Ody CM Sibon, David J Milan, Harold Snieder, Nilesh J Samani, Ruth JF Loos

**Affiliations** 1 Medical Research Council (MRC) Epidemiology Unit, Institute of Metabolic Science, Addenbrooke's Hospital, Cambridge, UK. 2 Department of Medical Sciences, Molecular Epidemiology and Science for Life Laboratory, Uppsala University, Uppsala, Sweden. 3 Department of Epidemiology, Erasmus University Medical Center, Rotterdam, the Netherlands. 4 Estonian Biocenter, Tartu, Estonia. 5 Estonian Genome Center, University of Tartu, Tartu, Estonia. 6 Institute of Molecular and Cell Biology, University of Tartu, Tartu, Estonia. 7 University of Groningen, University Medical Center Groningen, Department of Clinical Pharmacology, Groningen, The Netherlands. 8 Cardiovascular Research Center, Massachusetts General Hospital, Boston, MA, USA. 9 Medical Research Council (MRC) Centre for Causal Analyses in Translational Epidemiology (CAiTE), School of Social and Community Medicine, University of Bristol, Bristol, UK. 10 University of Groningen, University Medical Center Groningen, Department of Epidemiology, Groningen, The Netherlands. 11 Department of Molecular Biology, Massachusetts General Hospital, Boston, MA, USA. 12 Program in Medical and Population Genetics, Broad Institute of Harvard and MIT, Cambridge, MA, USA. 13 deCODE genetics, Reykjavik, Iceland. 14 Department of Genetics, Harvard Medical School, Boston, MA, USA. 15 University of Groningen, University Medical Center Groningen, Department of Genetics, Groningen, The Netherlands. 16 Clinical Pharmacology, NIHR Cardiovascular Biomedical Research Unit, William Harvey Research Institute, Barts and The London School of Medicine and Dentistry, Queen Mary University of London, London, UK. 17 Genome Centre, Barts and The London School of Medicine and Dentistry, Queen Mary University of London, London, UK. 18 Centre for Medical Systems Biology, Leiden, the Netherlands. 19 Wellcome Trust Sanger Institute, Hinxton, Cambridge, UK. 20 Broad Institute of MIT and Harvard, Cambridge, MA, USA. 21 The Danish National Research Foundation Centre for Cardiac Arrhythmia, Copenhagen, Denmark. 22 Novo Nordisk Foundation Center for Protein Research, Faculty of Health Sciences, University of Copenhagen, Copenhagen, Denmark. 23 Center for Genome Science, National Institute of Health, Osong Health Technology Administration Complex, Chungcheongbuk-do, The Republic of Korea. 24 Department of Clinical Sciences, Diabetes and Endocrinology, Lund University and Lund University Diabetes Centre, Malmö, Sweden. 25 Community Prevention Unit, Institute of Social and Preventive Medicine, Lausanne University Hospital, Lausanne, Switzerland. 26 Université de Montréal, Montréal, Quebec, Canada. 27 Montreal Heart Institute, Montreal, Quebec, Canada. 28 Nutrition, Harvard School of Public Health, Boston, MA, USA. 29 Division of Population Health Sciences and Education, St George's, University of London, London, UK. 30 Pediatric Epidemiology Center, University of South Florida, Tampa, Florida, USA. 31 University of Groningen, University Medical Center Groningen, Department of Cardiology, Groningen, The Netherlands. 32 Medical Research Council (MRC) Human Genetics Unit, Institute of Genetics and Molecular Medicine, University of Edinburgh, Edinburgh, UK. 33 Department of Internal Medicine, Vrije Universiteit Medical Center, Amsterdam, The Netherlands. 34 Department of Immunology, Genetics and Pathology, Uppsala University, Uppsala, Sweden. 35 Department of Biostatistics and Center for Statistical Genetics, University of Michigan, Ann Arbor, MI 48109, USA. 36 Department of Medical Genetics, University of Lausanne, Lausanne, Switzerland. 37 Swiss Institute of Bioinformatics, Lausanne, Switzerland. 38 The Institute of Molecular Medicine, University of Helsinki, Finland. 39 Department of Molecular Medicine, National Public Health Institute, Helsinki, Finland. 40 Department of Internal Medicine, Institute of Medicine, Sahlgrenska Academy, University of Gothenburg, Gothenburg, Sweden. 41 Division of Endocrinology, Diabetes, and Nutrition, Department of Medicine, University of Maryland, School of Medicine, Baltimore, MD, USA. 42 Department of Medicine, Institute for Human Genetics, University of California, San Francisco, CA, USA. 43 Department of Epidemiology and Biostatistics, Imperial College London, London, UK. 44 Medical Research Council Health Protection Agency (MRC-HPA) Centre for Environment and Health, Imperial College London, UK. 45 Institute of Cardiovascular and Medical Sciences, College of Medical Veterinary and Life Sciences, University of Glasgow, Glasgow, UK. 46 Human Genomics Laboratory, Pennington Biomedical Research Center, Baton Rouge, USA. 47 Department of Chronic

Disease Prevention, National Institute for Health and Welfare, Helsinki, Finland 48 Clinical Research Branch, National Institute on Aging, Baltimore MD, USA. 49 HudsonAlpha Institute for Biotechnology, Huntsville, AL, USA. 50 Information Management Services, Inc., Rockville, MD, USA. 51 Department of Biological Psychology, VU University Amsterdam & Institute for Health and Care Research (EMGO+), VU Medical Center, Amsterdam, The Netherlands. 52 Division of Statistical Genomics, Washington University School of Medicine, St. Louis, MO, USA. 53 Department of Biostatistics, University of Washington, Seattle, WA, USA. 54 Quantitative Genetics Laboratory, Queensland Institute of Medical Research, Brisbane, Queensland, Australia. 55 Complex Genetics Section, Department of Medical Genetics - DBG, University Medical Center Utrecht, Utrecht, the Netherlands. 56 Julius Center for Health Sciences and Primary Care, University Medical Center Utrecht, Utrecht, The Netherlands. 57 Department of Medical Epidemiology and Biostatistics, Karolinska Institutet, Stockholm, Sweden. 58 Peninsula College of Medicine and Dentistry, University of Exeter, Exeter, UK. 59 Centre National de la Recherche Scientifique (CNRS), UMR 8199 Institut Pasteur de Lille, Lille, France. 60 Division of Preventive Medicine, Cardiovascular Division, Brigham and Women's Hospital, Boston, MA, USA. 61 Harvard Medical School, Boston, MA, USA. 62 Division of Epidemiology and Community Health School of Public Health, University of Minnesota, Minneapolis, MN, USA. 63 Department of Medicine, Division of Cardiology, Johns Hopkins University School of Medicine, Baltimore, MD, USA. 64 McKusick-Nathans Institute of Genetic Medicine, Johns Hopkins University School of Medicine, Baltimore, MD, USA. 65 Division of Genetics, Department of Medicine, Brigham's and Women's Hospital, Boston, MA, USA. 66 Department of Medical Genetics, Division of Biomedical Genetics, University Medical Center Utrecht, Utrecht, The Netherlands. 67 Inserm, CESP Centre for research in Epidemiology and Population Health, U1018, Epidemiology of diabetes, obesity and chronic kidney disease over the lifecourse, Villejuif, France. 68 University Paris Sud 11, UMRS 1018, F-94807, Villejuif, France. 69 Department of Health Sciences, Milan University and Filarete Foundation, Milan, Italy. 70 Cardiovascular Health Research Unit, University of Washington, Metropolitan Park East Tower, Seattle, WA, USA. 71 Department of Medicine, University of Washington, Seattle, WA, USA. 72 Lille Nord de France University, Lille, France. 73 INSERM U970 Paris Cardiovascular Research Centre, Hopital Européen Georges Pampidou, 56 Rue Le Blanc 75015, Paris, France. 74 Division of Cancer Epidemiology and Genetics, US National Cancer Institute, Bethesda, MD, USA. 75 Laboratory of Translational Genomics, Division of Cancer Epidemiology and Genetics, US National Cancer Institute, Bethesda, MD, USA. 76 National Human Genome Research Institute, National Institute of Health, Bethesda, MD, USA. 77 Department of Cardiovascular Medicine, Heart and Vascular Institute, Cleveland Clinic, Cleveland, OH, USA. 78 Department of Molecular Cardiology, Lerner Research Institute, Cleveland Clinic, Cleveland, OH, USA. 79 Department of Medicine, Vanderbilt University School of Medicine, Nashville, TN, USA 80 Inserm U1087, CNRS U6291 and University of Nantes, l'institut du thorax, Nantes, France. 81 CHU Nantes, l'institut du thorax, Nantes, France 82 Department of Internal Medicine B, University Medicine Greifswald, Greifswald, Germany. 83 DZHK (German Centre for Cardiovascular Research), partner site Greifswald, Greifswald, Germany. 84 Department of Biostatistics, University of Michigan, Ann Arbor, MI, USA. 85 Icelandic Heart Association Research Institute, Kopavogur, Iceland. 86 University of Iceland, Reykjavik, Iceland. 87 National Institute of Ageing's Laboratory for Epidemiology, Demography, and Biometry, Bethesda, MD, USA. 88 Department of Clinical Sciences, Obstetrics and Gynecology, University of Oulu, Oulu, Finland. 89 Department of Epidemiology, University of Washington, Seattle, WA, USA. 90 Center for Biomedicine, European Academy Bozen/Bolzano (EURAC), Bolzano, Italy – Affiliated Institute of the University of Lübeck, Lübeck, Germany. 91 Netherlands Genomics Initiative-sponsored Netherlands Consortium for Healthy Ageing, Rotterdam, the Netherlands. 92 Department of General Internal Medicine, Division of Vascular Medicine, Radboud University Nijmegen Medical Centre, Nijmegen, The Netherlands. 93 Nyken BV, Groningen, The Netherlands. 94 Uppsala Clinical Research Center, Uppsala University Hospital, Uppsala, Sweden. 95 Division of Cardiology, Miller School of Medicine, University of Miami, Miami, FL, USA. 96 Institute of Clinical Medicine, Department of Internal Medicine, University of Oulu, Oulu, Finland. 97 Department of Medicine I, University Hospital Grosshadern, Ludwig-Maximilians-University, Munich, Germany. 98 Munich Heart Alliance, Munich,



Germany. 99 University of Groningen, University Medical Center Groningen, Department of Cell Biology, Groningen, The Netherlands. 100 Department of Public Health and Primary Care, Institute of Public Health, University of Cambridge, Cambridge, UK. 101 Department of Medicine, Stanford University School of Medicine, Stanford, CA, USA. 102 Cardiology department, Ealing Hospital NHS trust, London, UK. 103 Department of Medical Informatics, Erasmus University Medical Center, Rotterdam, the Netherlands. 104 Genetic Epidemiology Group, Department of Epidemiology and Public Health, UCL, London, UK. 105 National Public Health Institute, Biomedicum Helsinki, Helsinki, Finland. 106 Laboratory of Cardiovascular Science, National Institute on Aging, Baltimore, MD, USA. 107 Division Pharmacoepidemiology & Clinical Pharmacology, Utrecht University, Utrecht, The Netherlands. 108 Department of Epidemiology & Prevention, Division of Public Health Sciences, Wake Forest University, Winston-Salem, NC, USA. 109 Department of Biostatistics, School of Public Health, Boston University, Boston, MA, USA. 110 National Heart, Lung and Blood Institute's Framingham Heart Study, Framingham, MA, USA. 111 Institute for Community Medicine, University Medicine Greifswald, Greifswald, Germany. 112 IUMSP, CHUV and University of Lausanne, Lausanne, Switzerland. 113 School of Social and Community Medicine, University of Bristol, Bristol, UK. 114 Molecular Epidemiology Laboratory, Queensland Institute of Medical Research, Brisbane, Queensland, Australia. 115 Human Genetics Center, university of Texas, Health Science Center, Houston, TX, USA. 116 Institute of Medical Informatics, Biometry and Epidemiology, Chair of Genetic Epidemiology, Ludwig-Maximilians-Universität, Munich, Germany. 117 Institute of Genetic Epidemiology, Helmholtz Zentrum München - German Research Center for Environmental Health, Neuherberg, Germany. 118 Department of Medical Genetics and Development, University of Geneva Medical School, Geneva, Switzerland. 119 Cardiology Division, Massachusetts General Hospital, Boston, MA, USA. 120 National Heart, Lung and Blood Institute, Bethesda, MD, USA. 121 Medical Research Council (MRC) Unit for Lifelong Health and Ageing, London, UK. 122 Department of Epidemiology, University of Pittsburgh, Pittsburgh, PA, USA. 123 Institute of Epidemiology II, Helmholtz Zentrum München - German Research Center for Environmental Health, Neuherberg, Germany. 124 Department of Public Health, Faculty of Medicine, University of Split, Split, Croatia. 125 National Institute for Health and Welfare, Oulu, Finland. 126 Department of Neurology, General Central Hospital, Bolzano, Italy. 127 Department of Neurology, University of Lübeck, Lübeck, Germany. 128 Group Health Research Institute, Seattle, WA, USA. 129 Department of Health Services, University of Washington, Seattle, WA, USA. 130 Division of Biostatistics, Washington University School of Medicine, St. Louis, MO, USA. 131 Analytic and Translational Genetics Unit, Massachusetts General Hospital, Boston, MA, USA. 132 Harvard Biological and Biomedical Sciences Program, Harvard University, Boston, MA, USA. 133 Health Science and Technology MD Program, Harvard University and Massachusetts Institute of Technology, Boston, MA, USA. 134 Department of Pathophysiology, Faculty of Medicine, University of Split, Split, Croatia. 135 Istituto di Ricerca Genetica e Biomedica, CNR, Monserrato, Cagliari, Italy. 136 National Heart and Lung Institute, Imperial College London, London, UK. 137 Laboratory of Neurogenetics, National Institute on Aging, Bethesda, MD, USA. 138 Department of Twin Research and Genetic Epidemiology Unit, St Thomas' Campus, King's College London, St Thomas' Hospital, London, UK. 139 Biology Department, Boston College, Chestnut Hill, MA, USA. 140 Department of Internal Medicine, Erasmus Medical Center, Rotterdam, the Netherlands. 141 Genetic Epidemiology Laboratory, Queensland Institute of Medical Research, Brisbane, Queensland, Australia. 142 Centre for Population Health Sciences, University of Edinburgh, Edinburgh, UK. 143 Division of Biomedical Sciences, St George's University of London, London, UK. 144 Department of Physiatics, Lapland Central Hospital, Lapland, Finland. 145 Centre for Nutrition, Prevention and Health Services, National Institute for Public Health and the Environment (RIVM), Bilthoven, the Netherlands. 146 Department of Sports Medicine, Norwegian School of Sport Sciences, Oslo, Norway. 147 Genomic Medicine, Hammersmith Hospital, Imperial College London, London, UK. 148 Wellcome Trust Centre for Human Genetics, University of Oxford, Oxford, OX3 7BN, United Kingdom. 149 Department of Medical Sciences, Uppsala University, Akademiska sjukhuset, Uppsala, Sweden. 150 Department of Clinical Genetics, Erasmus University Medical Center, Rotterdam, the Netherlands. 151 Medical Genetics Institute, Cedars-Sinai Medical Center, Los Angeles, CA, USA. 152 Institute of Cellular Medicine, Newcastle University, Newcastle,

UK. 153 Department of Medicine, Landspítali University Hospital, Reykjavik, Iceland. 154 Faculty of Medicine, University of Iceland, Reykjavik, Iceland. 155 Geriatric Unit, Azienda Sanitaria Firenze (ASF), Florence, Italy. 156 Brigham and Women's Hospital, Harvard Medical School, Boston, MA, USA. 157 Department of General Practice and Primary Health Care, University of Helsinki, Helsinki, Finland. 158 Folkhälsan Research Centre, Helsinki, Finland. 159 Helsinki University Central Hospital, Unit of General Practice, Helsinki, Finland. 160 Hypertension and Related Diseases Centre-AOU, University of Sassari, Sassari, Italy. 161 Program in Molecular and Genetic Epidemiology, Harvard School of Public Health, Boston, MA, USA. 162 Division of Research, Kaiser Permanente of Northern California, Oakland, CA, USA. 163 Department of Social Services and Health Care, Jakobstad, Finland. 164 Biocenter Oulu, University of Oulu, Oulu, Finland. 165 Institute of Health Sciences, University of Oulu, Finland. 166 Department of Chronic Disease Prevention, National Institute for Health and Welfare (THL), Turku, Finland. 167 Department of Clinical Chemistry, University of Tampere and Tampere University Hospital, Tampere, Finland. 168 Department for Health Evidence, Radboud University Medical Centre, Nijmegen, The Netherlands. 169 Department of Urology, Radboud University Nijmegen Medical Centre, Nijmegen, The Netherlands. 170 University of Groningen, University Medical Center Groningen, Department of Endocrinology, Groningen, The Netherlands. 171 Laboratory of Genetic and Environmental Epidemiology, Fondazione di Ricerca e Cura "Giovanni Paolo II", Catholic University, Campobasso, Italy. 172 Transplantation Laboratory, Haartman Institute, University of Helsinki, Helsinki, Finland. 173 University of Groningen, University Medical Center Groningen, Department of Internal Medicine, Groningen, The Netherlands. 174 Department of Medicine, Division of Cardiology, Helsinki University Central Hospital, Helsinki, Finland. 175 International Centre for Circulatory Health (ICCH), Imperial College London, London, UK. 176 Research Centre of Applied and Preventive Cardiovascular Medicine, University of Turku, Turku, Finland. 177 Department of Clinical Physiology and Nuclear Medicine, University of Turku and Turku University Hospital, Turku, Finland. 178 Kosgenetic Srl, Milano, Italy. 179 Complex and Adaptive Systems Laboratory, University College Dublin, Belfield, Dublin, Ireland. 180 Conway Institute of Biomolecular and Biomedical Research, University College Dublin, Belfield, Dublin, Ireland. 181 School of Medicine and Medical Sciences, University College Dublin, Belfield, Dublin, Ireland. 182 Geriatric Research and Education Clinical Center, Veterans Administration Medical Center, Baltimore, MD, USA. 183 Molecular and Cellular Therapeutics, Royal College of Surgeons in Ireland, Dublin, Ireland. 184 Diabetes Unit, National Institute for Health and Welfare (THL), Helsinki, Finland. 185 Centre for Vascular Prevention, Danube-University Krems, Krems, Austria. 186 Red RECAVA Grupo RD06/0014/0015, Hospital Universitario La Paz, Madrid, Spain. 187 King Abdulaziz University, Jeddah, Saudi Arabia. 188 Department of Medicine, University of Turku and Turku University Hospital, Turku, Finland. 189 Department of Internal Medicine, University Hospital of Lausanne, Lausanne, Switzerland. 190 Institute for Molecular Medicine Finland (FIMM), University of Helsinki, Finland. 191 Department of Biomedical Science, Hallym University, Chuncheon, Gangwon-do, Republic of Korea. 192 Queensland Brain Institute, University of Queensland, Brisbane, Queensland, Australia. 193 University of Michigan, Department of Internal Medicine, Ann Arbor, MI, USA. 194 Blizard Institute of Cell and Molecular Science, Barts and The London School of Medicine and Dentistry, Queen Mary University of London, London, UK. 195 A full list of members is provided in the Supplementary Note. 196 Institute for Integrative and Experimental Genomics, Universität zu Lübeck, Lübeck, Germany. 197 DZHK (German Centre for Cardiovascular Research), partner site Hamburg/Kiel/Lübeck, Lübeck, Germany. 198 Department of Health Sciences, University of Leicester, Leicester, UK. 199 Institute of Human Genetics, Helmholtz Center Munich, Munich, Germany. 200 Institute of human Genetics, Klinikum Rechts der Isar der Technischen Universität München, Munich, Germany. 201 Division of Cardiology, Department of Medicine, University of Washington School of Medicine Seattle, WA, USA. 202 Center for Human Genetic Research, Cardiovascular Research Center, Massachusetts General Hospital, Boston, MA, USA. 203 Cardiac Arrhythmia Service, Massachusetts General Hospital, Boston, MA, USA. 204 Cardiovascular Research Center, Massachusetts General Hospital, Charlestown, MA, USA. 205 Inspectorate of Health Care, The Hague, the Netherlands. 206 Service of Medical Genetics, Centre Hospitalier Universitaire Vaudois (CHUV) University Hospital, Lausanne, Switzerland. 207 Center for Human

Genetic Research, Massachusetts General Hospital, Boston, MA, USA. 208 Department of Cardiovascular Sciences, University of Leicester, Glenfield Hospital, Leicester, UK. 209 National Institute for Health Research Leicester Biomedical Research Unit in Cardiovascular Disease, Glenfield Hospital, Leicester, UK. 210 The Genetics of Obesity and Related Metabolic Traits Program, The Ichan School of Medicine at Mount Sinai, New York, NY, USA. 211 The Charles Bronfman Institute of Personalized Medicine, The Ichan School of Medicine at Mount Sinai, New York, NY, USA. 212 The Mindich Child Health and Development Institute, The Ichan School of Medicine at Mount Sinai, New York, NY, USA.

## Membership of the DCCT/EDIC Study Research Group

The following persons and institutions participated in the DCCT/EDIC Study Research Group:

*Study Chairmen* - S. Genuth, D.M. Nathan, B. Zinman (vice-chair), O. Crofford (past)  
*Albert Einstein College of Medicine* - J. Crandall, M. Reid, J. Brown-Friday, S. Engel, J. Sheindlin, H. Martinez (past), H. Shamoon (past), H. Engel (past), M. Phillips  
*Case Western Reserve University* - R. Gubitosi-Klug, L. Mayer, S. Pendegast, H. Zegarra, D. Miller, L. Singerman, S. Smith-Brewer, M. Novak, J. Quin (past), W. Dahms (deceased), Saul Genuth (past), M. Palmert (past)  
*Cornell University Medical Center* - D. Brillon, M.E. Lackaye, S. Kiss, R. Chan, V. Reppucci (past), T. Lee (past), M. Heinemann (past)  
*Henry Ford Health System* - F. Whitehouse, D. Kruger, J. K. Jones, M. McLellan (past), J.D. Carey, E. Angus, A. Thomas, A. Galprin (past)  
*International Diabetes Center* - R. Bergenstal, M. Johnson, M. Spencer (past), K. Morgan, D. Etzwiler (deceased), D. Kendall (past)  
*Joslin Diabetes Center* - Lloyd Paul Aiello, E. Golden, A. Jacobson (past), R. Beaser, O. Ganda, O. Hamdy, H. Wolpert, G. Sharuk, P. Arrigg, D. Schlossman, J. Rosenzweig (past), L. Rand (past)  
*Massachusetts General Hospital* - D.M. Nathan, M. Larkin, M. Ong, J. Godine, E. Cagliero, P. Lou, K. Folino, S. Fritz (past), S. Crowell (past), K. Hansen (past), C. Gauthier-Kelly (past)  
*Mayo Foundation* - J. Service, G. Ziegler  
*Medical University of South Carolina* - L. Luttrell, S. Caulder, M. Lopes-Virella (past), J. Colwell (past), J. Soule (past), J. Fernandes, K. Hermayer, S. Kwon, M. Brabham (past), A. Blevins, J. Parker, D. Lee (past), N. Patel, C. Pittman, P. Lindsey (past), M. Bracey (past), K. Lee, M. Nutaitis, A. Farr (past), S. Elsing (past), T. Thompson (past), J. Selby (past), T. Lyons (past), S. Yacoub-Wasef (past), M. Szpiech (past), D. Wood (past), R. Mayfield (past)  
*Northwestern University* - M. Molitch, B. Schaefer, L. Jampol, A. Lyon, M. Gill, Z. Strugula, L. Kaminski, R. Mirza, E. Simjanoski, D. Ryan  
*University of California, San Diego* - O. Kolterman, G. Lorenzi, M. Goldbaum  
*University of Iowa* - W. Sivitz, M. Bayless  
*University of Maryland School of Medicine* - D. Counts, S. Johnsonbaugh, M. Hebdon (past), P. Salemi, R. Liss, T. Donner (past), J. Gordon (past), R. Hemady (past), A. Kowarski (past), D. Ostrowski (past) S. Steidl (past), B. Jones (past)  
*University of Michigan* - W.H. Herman, C.L. Martin, R. Pop-Busui, A. Sarma, J. Albers, E. Feldman, K. Kim, S. Elner, G. Comer, T. Gardner, R. Hackel, R. Prusak, L. Goings, A. Smith, J. Gothrup, P. Titus, J. Lee, M. Brandle, L. Prosser, D.A. Greene (past), M.J. Stevens (past), A. K. Vine (past)  
*University of Minnesota* - J. Bantle, N. Wimmergren, A. Cochrane, T. Olsen (past), E. Steuer (past), P. Rath (past), B. Rogness (past)  
*University of Missouri* - D. Hainsworth, D. Goldstein, S. Hitt, J. Giangiacomo  
*University of New Mexico* - D.S. Schade, J.L. Canady, J.E. Chapin, L.H. Ketani  
*University of Pennsylvania* - S. Braunstein, P.A. Bourne, S. Schwartz (past), A. Brucker, B.J. Maschak-Carey (past), L. Baker (deceased)

*University of Pittsburgh* - T. Orchard, N. Silvers, C. Ryan, T. Songer, B. Doft, S. Olson, R.L. Bergren, L. Lobes, P. Paczan Rath, D. Becker, D. Rubinstein, P.W. Conrad, S. Yalamanchi, A. Drash (past)

*University of South Florida* - A. Morrison, M.L. Bernal, J. Vaccaro-Kish (past), J. Malone, P.R. Pavan, N. Grove, M.N. Iyer, A.F. Burrows, E.A. Tanaka (past), R. Gstalder (past)

*University of Tennessee* - S. Dagogo-Jack, C. Wigley, H. Ricks, A. Kitabchi, M. B. Murphy (past), S. Moser (past), D. Meyer (past), A. Iannacone (past), E. Chaum, S. Yoser (past), M. Bryer-Ash (past), S. Schussler (past), H. Lambeth (past)

*The University of Texas Southwestern Medical Center at Dallas* - P. Raskin, S. Strowig

*University of Toronto* - B. Zinman, A. Barnie, R. Devenyi, M. Mandelcorn, M. Brent, S. Rogers, A. Gordon

*University of Washington* - J. Palmer, S. Catton, J. Brunzell, H. Wessells, I. H. de Boer, J. Hokanson, J. Purnell, J. Ginsberg, J. Kinyoun, S. Deeb, M. Weiss, G. Meekins, J. Distad, L. Van Ottingham (past)

*University of Western Ontario* - J. Dupre, J. Harth, D. Nicolle, M. Driscoll, J. Mahon, C. Canny  
*Vanderbilt University* - M. May, J. Lipps, A. Agarwal, T. Adkins, L. Survant, R. L. Pate, G. E. Munn, R. Lorenz (past), S. Feman (past)

*Washington University, St. Louis* - N. White, L. Levandoski, I. Boniuk, G. Grand, M. Thomas, D. D. Joseph, K. Blinder, G. Shah, Boniuk (past), Burgess (past), J. Santiago (deceased)

*Yale University School of Medicine* - W. Tamborlane, P. Gatcomb, K. Stoessel, K. Taylor (past), J. Goldstein (past), S. Novella (past), H. Mojibian (past), D. Cornfeld (past)

*Clinical Coordinating Center (Case Western Reserve University)* - R. Gubitosi-Klug, J. Quin, P. Gaston, M. Palmert (past), R. Trail (past), W. Dahms (deceased)

*Data Coordinating Center (The George Washington University, The Biostatistics Center)* - J. Lachin, P. Cleary, J. Backlund, W. Sun, B. Braffett, K. Klumpp, K. Chan (past), L. Diminick, D. Rosenberg (past), B. Petty (past), A. Determan (past), D. Kenny (past), B. Rutledge (past), Naji Younes (past), Williams (past), L. Dews, M. Hawkins

*National Institute of Diabetes and Digestive and Kidney Disease Program Office* - C. Cowie, J. Fradkin, C. Siebert (past), R. Eastman (past)

*Central Fundus Photograph Reading Center (University of Wisconsin)* - R. Danis, S. Gangaputra, S. Neill, M. Davis (past), L. Hubbard (past), H. Wabers, M. Burger, J. Dingleline, V. Gama, R. Sussman

*Central Biochemistry Laboratory (University of Minnesota)* - M. Steffes, J. Bucksa, M. Nowicki, B. Chavers

*Central Carotid Ultrasound Unit (New England Medical Center)* - D. O'Leary, J. Polak, A. Harrington, L. Funk (past)

*Central ECG Reading Unit (University of Minnesota)* - R. Crow (past), B. Gloeb (past), S. Thomas (past), C. O'Donnell (past)

*Central ECG Reading Unit (Wake Forest University)* – E. Soliman, Z.M. Zhang, R. Prineas (past), C. Campbell

*Central Neuropsychological Coding Unit* – C. Ryan, D. Sandstrom, T. Williams, M. Geckle, E. Cupelli, F. Thoma, B. Burzuk, T. Woodfill

*Central ANS Reading Unit (Mayo Clinic)* – P. Low, C. Sommer, K. Nickander

*Computed Tomography Reading Center (Harbor UCLA Research and Education Institute)* – M. Budoff, R. Detrano (past), N. Wong, M. Fox, L. Kim (past), R. Oudiz

*Johns Hopkins Medical Institutions* – J. Lima, D. Bluemke, E. Turkbey, R. J. van der Geest, C. Liu, A. Malayeri, A. Jain, C. Miao (past), H. Chahal (past), R. Jarboe (past)

*External Evaluation Committee*– G. Weir (Chairman), M. Espeland, B. Klein, T Manolio, L. Rand, D. Singer, M. Stern, A.E. Boulton, C. Clark (past), R. D’Agostino (past)

*Molecular Risk Factors Program Project (Medical University of South Carolina)* - M. Lopes-Virella, W.T. Garvey (past), T.J. Lyons, A. Jenkins, R. Klein, G. Virella, A. Jaffa, Rickey Carter, D. Lackland (past), M. Brabham (past), D. McGee (past), D. Zheng (past), R. K. Mayfield (past)

*Genetic Studies Group (Hospital for Sick Children)* - A. Paterson, A. Boright, S. Bull, L. Sun, S. Scherer (past), B. Zinman (past)

*SCOUT (Veralight)* – J. Maynard

*Epigenetics (Beckman Research Institute of City of Hope Medical Center)* – R. Natarajan, F. Miao, L. Zhang, Z. Chen

*Editor, EDIC Publications* - D.M. Nathan

## **Membership of the eMERGE consortium**

Contributing authors include:

Dana C. Crawford PhD, Vanderbilt University School of Medicine, Nashville, TN

Jonathan S. Schildcrout PhD, Vanderbilt University School of Medicine, Nashville, TN

Lisa Bastarache MS, Vanderbilt University School of Medicine, Nashville, TN

Andrea H. Ramirez MD, Vanderbilt University School of Medicine, Nashville, TN

Jonathan D. Mosley MD PhD, Vanderbilt University School of Medicine, Nashville, TN

Jill M. Pulley MBA, Vanderbilt University School of Medicine, Nashville, TN

Melissa A. Basford MBA, Vanderbilt University School of Medicine, Nashville, TN

Yuki Bradford MS, Vanderbilt University School of Medicine, Nashville, TN

Luke V. Rasmussen, Northwestern University School of Medicine, Chicago IL

Jyotishman Pathak PhD, Mayo Clinic, Rochester MN

Christopher G. Chute MD DrPH, Mayo Clinic, Rochester MN

Jim Linneman, Marshfield Clinic, Marshfield, MN

Iftikhar J. Kullo MD, Mayo Clinic, Rochester MN

Catherine A. McCarty PhD, Essentia Institute of Rural Health

Rex L. Chisholm PhD, Northwestern University School of Medicine, Chicago IL

Abel N. Kho MD MS, Northwestern University School of Medicine, Chicago IL

Christopher S. Carlson PhD, University of Washington, Seattle, WA

Eric B. Larson MD MPH, Group Health Research Institute, Seattle, WA

David Carrell, PhD, Group Health Research Institute, Seattle, WA

Gail P. Jarvik MD PhD, University of Washington, Seattle, WA

David Crosslin, PhD, University of Washington, Seattle, WA

Teri A. Manolio MD PhD, National Human Genome Research Institute, National Institutes of Health, Bethesda, MD

Rongling Li PhD, National Human Genome Research Institute, National Institutes of Health, Bethesda, MD

Daniel R. Masys MD, University of Washington, Seattle, WA

Jonathan L. Haines PhD, Case Western Reserve University, Cleveland, OH

## **Websites accessed**

### **MANTEL**

<http://debakker.med.harvard.edu/resources.html>

### **GWIS**

<http://128.220.136.46/wiki/baderlab/index.php/GWiS>

### **NHGRI GWAS Catalog**

<http://www.genome.gov/gwastudies>

### **SNAP**

<http://www.broadinstitute.org/mpg/snap>

### **DAPPLE**

<http://www.broadinstitute.org/mpg/dapple>

### **PolyPhen**

<http://genetics.bwh.harvard.edu/pph>

### **SIFT**

<http://sift.jcvi.org>



## References for supplementary information

1. Harris, T.B. *et al.* Age, Gene/Environment Susceptibility-Reykjavik Study: multidisciplinary applied phenomics. *American journal of epidemiology* **165**, 1076-87 (2007).
2. Mitchell, B.D. *et al.* The genetic response to short-term interventions affecting cardiovascular function: rationale and design of the Heredity and Phenotype Intervention (HAPI) Heart Study. *American heart journal* **155**, 823-8 (2008).
3. Rampersaud, E. *et al.* The association of coronary artery calcification and carotid artery intima-media thickness with distinct, traditional coronary artery disease risk factors in asymptomatic adults. *American journal of epidemiology* **168**, 1016-23 (2008).
4. The Atherosclerosis Risk in Communities (ARIC) Study: design and objectives. The ARIC investigators. *Am J Epidemiol* **129**, 687-702 (1989).
5. Rautaharju, P.M., Park, L.P., Chaitman, B.R., Rautaharju, F. & Zhang, Z.M. The Novacode criteria for classification of ECG abnormalities and their clinically significant progression and regression. *Journal of electrocardiology* **31**, 157-87 (1998).
6. Dekker, J.M., Crow, R.S., Hannan, P.J., Schouten, E.G. & Folsom, A.R. Heart rate-corrected QT interval prolongation predicts risk of coronary heart disease in black and white middle-aged men and women: the ARIC study. *J Am Coll Cardiol* **43**, 565-71 (2004).
7. Shock, N. *et al.* Normal human aging: the Baltimore Longitudinal Study of Aging. (US Government Printing Office, Washington, D.C., 1984).
8. Fried, L.P. *et al.* The Cardiovascular Health Study: design and rationale. *Ann Epidemiol* **1**, 263-76 (1991).
9. The Diabetes Control and Complications Trial (DCCT). Design and methodologic considerations for the feasibility phase. The DCCT Research Group. *Diabetes* **35**, 530-45 (1986).
10. Epidemiology of Diabetes Interventions and Complications (EDIC). Design, implementation, and preliminary results of a long-term follow-up of the Diabetes Control and Complications Trial cohort. *Diabetes care* **22**, 99-111 (1999).
11. Paterson, A.D., Rutledge, B.N., Cleary, P.A., Lachin, J.M. & Crow, R.S. The effect of intensive diabetes treatment on resting heart rate in type 1 diabetes: the Diabetes Control and Complications Trial/Epidemiology of Diabetes Interventions and Complications study. *Diabetes care* **30**, 2107-12 (2007).
12. Zhou, S.H., Helfenbein, E.D., Lindauer, J.M., Gregg, R.E. & Feild, D.Q. Philips QT interval measurement algorithms for diagnostic, ambulatory, and patient monitoring ECG applications. *Annals of noninvasive electrocardiology : the official journal of the International Society for Holter and Noninvasive Electrocardiology, Inc* **14 Suppl 1**, S3-8 (2009).
13. McCarty, C.A. *et al.* The eMERGE Network: a consortium of biorepositories linked to electronic medical records data for conducting genomic studies. *BMC medical genomics* **4**, 13 (2011).
14. Zuvich, R.L. *et al.* Pitfalls of merging GWAS data: lessons learned in the eMERGE network and quality control procedures to maintain high data quality. *Genetic epidemiology* **35**, 887-98 (2011).
15. Denny, J.C. *et al.* Identification of genomic predictors of atrioventricular conduction: using electronic medical records as a tool for genome science. *Circulation* **122**, 2016-21 (2010).
16. Kors, J.A. & van Herpen, G. Methodology of QT-interval measurement in the modular ECG analysis system (MEANS). *Annals of noninvasive electrocardiology : the official journal of the International Society for Holter and Noninvasive Electrocardiology, Inc* **14 Suppl 1**, S48-53 (2009).
17. Dawber, T.R., Kannel, W.B. & Lyell, L.P. An approach to longitudinal studies in a community: the Framingham Study. *Annals of the New York Academy of Sciences* **107**, 539-56 (1963).
18. Kannel, W.B., Feinleib, M., McNamara, P.M., Garrison, R.J. & Castelli, W.P. An investigation of coronary heart disease in families. The Framingham offspring study. *American journal of epidemiology* **110**, 281-90 (1979).
19. Splansky, G.L. *et al.* The Third Generation Cohort of the National Heart, Lung, and Blood Institute's Framingham Heart Study: design, recruitment, and initial examination. *American journal of epidemiology* **165**, 1328-35 (2007).
20. Newton-Cheh, C. *et al.* Common variants at ten loci influence QT interval duration in the QTGEN Study. *Nature genetics* **41**, 399-406 (2009).
21. Porthan, K. *et al.* Predictive value of electrocardiographic QT interval and T-wave morphology parameters for all-cause and cardiovascular mortality in a general population sample. *Heart rhythm : the official journal of the Heart Rhythm Society* **6**, 1202-8, 1208 e1 (2009).

22. Harris, T.B. *et al.* Waist circumference and sagittal diameter reflect total body fat better than visceral fat in older men and women. The Health, Aging and Body Composition Study. *Annals of the New York Academy of Sciences* **904**, 462-73 (2000).
23. Schmermund, A. *et al.* Assessment of clinically silent atherosclerotic disease and established and novel risk factors for predicting myocardial infarction and cardiac death in healthy middle-aged subjects: rationale and design of the Heinz Nixdorf RECALL Study. Risk Factors, Evaluation of Coronary Calcium and Lifestyle. *American heart journal* **144**, 212-8 (2002).
24. Mohlenkamp, S. *et al.* Subclinical coronary atherosclerosis and resting ECG abnormalities in an unselected general population. *Atherosclerosis* **196**, 786-94 (2008).
25. Michelucci, A. *et al.* Simultaneous assessment of electrocardiographic parameters for risk stratification: validation in healthy subjects. *Italian heart journal : official journal of the Italian Federation of Cardiology* **3**, 308-17 (2002).
26. Pfeufer, A. *et al.* Common variants in myocardial ion channel genes modify the QT interval in the general population: results from the KORA study. *Circ Res* **96**, 693-701 (2005).
27. van Bommel, J.H., Kors, J.A. & van Herpen, G. Methodology of the modular ECG analysis system MEANS. *Methods of information in medicine* **29**, 346-53 (1990).
28. Prineas, R.J., Crow, R.S. & Blackburn, H. The Minnesota Code Manual of Electrocardiographic Findings Standard Procedures for Measurement and Classification. (John Wright PSB, Boston, 1982).
29. Kors, J.A. *et al.* Validation of a new computer program for Minnesota coding. *Journal of electrocardiology* **29 Suppl**, 83-8 (1996).
30. de Bruyne, M.C. *et al.* Diagnostic interpretation of electrocardiograms in population-based research: computer program research physicians, or cardiologists? *Journal of clinical epidemiology* **50**, 947-52 (1997).
31. Kors, J.A., Crow, R.S., Hannan, P.J., Rautaharju, P.M. & Folsom, A.R. Comparison of computer-assigned Minnesota Codes with the visual standard method for new coronary heart disease events. *American journal of epidemiology* **151**, 790-7 (2000).
32. Pattaro, C. *et al.* The genetic study of three population microisolates in South Tyrol (MICROS): study design and epidemiological perspectives. *BMC medical genetics* **8**, 29 (2007).
33. Krawczak, M. *et al.* PopGen: population-based recruitment of patients and controls for the analysis of complex genotype-phenotype relationships. *Community genetics* **9**, 55-61 (2006).
34. Hofman, A., Grobbee, D.E., de Jong, P.T. & van den Ouweland, F.A. Determinants of disease and disability in the elderly: the Rotterdam Elderly Study. *European journal of epidemiology* **7**, 403-22 (1991).
35. Hofman, A. *et al.* The Rotterdam Study: objectives and design update. *European journal of epidemiology* **22**, 819-29 (2007).
36. Hofman, A. *et al.* The Rotterdam Study: 2012 objectives and design update. *European journal of epidemiology* **26**, 657-86 (2011).
37. Pilia, G. *et al.* Heritability of cardiovascular and personality traits in 6,148 Sardinians. *PLoS genetics* **2**, e132 (2006).
38. Scuteri, A. *et al.* Genome-wide association scan shows genetic variants in the FTO gene are associated with obesity-related traits. *PLoS genetics* **3**, e115 (2007).
39. John, U. *et al.* Study of Health In Pomerania (SHIP): a health examination survey in an east German region: objectives and design. *Sozial- und Praventivmedizin* **46**, 186-94 (2001).
40. Volzke, H. *et al.* Cohort profile: the study of health in Pomerania. *International journal of epidemiology* **40**, 294-307 (2011).
41. Andrew, T. *et al.* Are twins and singletons comparable? A study of disease-related and lifestyle characteristics in adult women. *Twin research : the official journal of the International Society for Twin Studies* **4**, 464-77 (2001).
42. Raitakari, O.T. *et al.* Cohort profile: the cardiovascular risk in Young Finns Study. *International journal of epidemiology* **37**, 1220-6 (2008).
43. Raitakari, O.T. *et al.* Common variation in NOS1AP and KCNH2 genes and QT interval duration in young adults. The Cardiovascular Risk in Young Finns Study. *Annals of medicine* **41**, 144-51 (2009).
44. Walker, M., Whincup, P.H. & Shaper, A.G. The British Regional Heart Study 1975-2004. *International journal of epidemiology* **33**, 1185-92 (2004).
45. Greiser, K.H. *et al.* Cardiovascular disease, risk factors and heart rate variability in the elderly general population: design and objectives of the CARdiovascular disease, Living and Ageing in Halle (CARLA) Study. *BMC cardiovascular disorders* **5**, 33 (2005).
46. Tunstall-Pedoe, H., Kuulasmaa, K., Tolonen, H., Davidson, M. & Mendis, S. (eds.). *MONICA monograph and multimedia sourcebook*. (World Health Organization, Geneva, 2003).

47. Hart, C.L. *et al.* The Midspan studies. *International journal of epidemiology* **34**, 28-34 (2005).
48. Abu-Rmeileh, N.M. *et al.* Contribution of Midparental BMI and other determinants of obesity in adult offspring. *Obesity* **16**, 1388-93 (2008).
49. Macfarlane, P., Devine, B. & Clark, E. The University of Glasgow (Uni-G) ECG Analysis Program. *Computers in Cardiology* **32**, 451-454 (2005).
50. Berg, C. *et al.* Eating patterns and portion size associated with obesity in a Swedish population. *Appetite* **52**, 21-6 (2009).
51. Strandhagen, E. *et al.* Selection bias in a population survey with registry linkage: potential effect on socioeconomic gradient in cardiovascular risk. *European journal of epidemiology* **25**, 163-72 (2010).
52. Lind, L., Fors, N., Hall, J., Marttala, K. & Stenborg, A. A comparison of three different methods to evaluate endothelium-dependent vasodilation in the elderly: the Prospective Investigation of the Vasculature in Uppsala Seniors (PIVUS) study. *Arteriosclerosis, thrombosis, and vascular biology* **25**, 2368-75 (2005).
53. Blackburn, H., Keys, A., Simonson, E., Rautaharju, P. & Punsar, S. The electrocardiogram in population studies. A classification system. *Circulation* **21**, 1160-75 (1960).
54. Ingelsson, E., Sundstrom, J., Arnlov, J., Zethelius, B. & Lind, L. Insulin resistance and risk of congestive heart failure. *JAMA : the journal of the American Medical Association* **294**, 334-41 (2005).
55. Macfarlane, P.W. *et al.* Methodology of ECG interpretation in the Glasgow program. *Methods of information in medicine* **29**, 354-61 (1990).
56. Marchini, J., Howie, B., Myers, S., McVean, G. & Donnelly, P. A new multipoint method for genome-wide association studies by imputation of genotypes. *Nature genetics* **39**, 906-13 (2007).
57. Willer, C.J., Li, Y. & Abecasis, G.R. METAL: fast and efficient meta-analysis of genomewide association scans. *Bioinformatics* **26**, 2190-1 (2010).
58. Pe'er, I., Yelensky, R., Altshuler, D. & Daly, M.J. Estimation of the multiple testing burden for genomewide association studies of nearly all common variants. *Genet Epidemiol* **32**, 381-5 (2008).
59. Purcell, S. *et al.* PLINK: a tool set for whole-genome association and population-based linkage analyses. *American journal of human genetics* **81**, 559-75 (2007).
60. Pfeufer, A. *et al.* Common variants at ten loci modulate the QT interval duration in the QTSCD Study. *Nat Genet* **41**, 407-14 (2009).
61. Smith, J.G. *et al.* Impact of Ancestry and Common Genetic Variants on QT Interval in African Americans. *Circ Cardiovasc Genet* **5**, 647-655 (2012).
62. den Hoed, M. *et al.* Identification of heart rate-associated loci and their effects on cardiac conduction and rhythm disorders. *Nat Genet* (2013).
63. Sotoodehnia, N. *et al.* Common variants in 22 loci are associated with QRS duration and cardiac ventricular conduction. *Nature genetics* **42**, 1068-76 (2010).
64. Hindorff, L.A. *et al.* Potential etiologic and functional implications of genome-wide association loci for human diseases and traits. *Proceedings of the National Academy of Sciences of the United States of America* **106**, 9362-7 (2009).
65. Johnson, A.D. *et al.* SNAP: a web-based tool for identification and annotation of proxy SNPs using HapMap. *Bioinformatics* **24**, 2938-9 (2008).
66. Goring, H.H. *et al.* Discovery of expression QTLs using large-scale transcriptional profiling in human lymphocytes. *Nature genetics* **39**, 1208-16 (2007).
67. Idaghdour, Y. *et al.* Geographical genomics of human leukocyte gene expression variation in southern Morocco. *Nature genetics* **42**, 62-7 (2010).
68. Heap, G.A. *et al.* Complex nature of SNP genotype effects on gene expression in primary human leucocytes. *BMC medical genomics* **2**, 1 (2009).
69. Dixon, A.L. *et al.* A genome-wide association study of global gene expression. *Nature genetics* **39**, 1202-7 (2007).
70. Stranger, B.E. *et al.* Population genomics of human gene expression. *Nature genetics* **39**, 1217-24 (2007).
71. Kwan, T. *et al.* Genome-wide analysis of transcript isoform variation in humans. *Nature genetics* **40**, 225-31 (2008).
72. Heinzen, E.L. *et al.* Tissue-specific genetic control of splicing: implications for the study of complex traits. *PLoS biology* **6**, e1 (2008).
73. Zeller, T. *et al.* Genetics and beyond--the transcriptome of human monocytes and disease susceptibility. *PloS one* **5**, e10693 (2010).
74. Emilsson, V. *et al.* Genetics of gene expression and its effect on disease. *Nature* **452**, 423-8 (2008).

75. Greenawalt, D.M. *et al.* A survey of the genetics of stomach, liver, and adipose gene expression from a morbidly obese cohort. *Genome research* **21**, 1008-16 (2011).
76. Fehrmann, R.S. *et al.* Trans-eQTLs reveal that independent genetic variants associated with a complex phenotype converge on intermediate genes, with a major role for the HLA. *PLoS genetics* **7**, e1002197 (2011).
77. Kompass, K.S. & Witte, J.S. Co-regulatory expression quantitative trait loci mapping: method and application to endometrial cancer. *BMC medical genomics* **4**, 6 (2011).
78. Webster, J.A. *et al.* Genetic control of human brain transcript expression in Alzheimer disease. *American journal of human genetics* **84**, 445-58 (2009).
79. Schadt, E.E. *et al.* Mapping the genetic architecture of gene expression in human liver. *PLoS Biol* **6**, e107 (2008).
80. Innocenti, F. *et al.* Identification, replication, and functional fine-mapping of expression quantitative trait loci in primary human liver tissue. *PLoS genetics* **7**, e1002078 (2011).
81. Grundberg, E. *et al.* Population genomics in a disease targeted primary cell model. *Genome research* **19**, 1942-52 (2009).
82. Ding, J. *et al.* Gene expression in skin and lymphoblastoid cells: Refined statistical method reveals extensive overlap in cis-eQTL signals. *American journal of human genetics* **87**, 779-89 (2010).
83. Dimas, A.S. *et al.* Common regulatory variation impacts gene expression in a cell type-dependent manner. *Science* **325**, 1246-50 (2009).
84. Hu, X. *et al.* Integrating autoimmune risk loci with gene-expression data identifies specific pathogenic immune cell subsets. *Am J Hum Genet* **89**, 496-506 (2011).
85. Su, A.I. *et al.* A gene atlas of the mouse and human protein-encoding transcriptomes. *Proc Natl Acad Sci U S A* **101**, 6062-7 (2004).
86. Howie, B., Fuchsberger, C., Stephens, M., Marchini, J. & Abecasis, G.R. Fast and accurate genotype imputation in genome-wide association studies through pre-phasing. *Nat Genet* **44**, 955-9 (2012).
87. Irizarry, R.A. *et al.* Exploration, normalization, and summaries of high density oligonucleotide array probe level data. *Biostatistics* **4**, 249-64 (2003).
88. Johnson, W.E., Li, C. & Rabinovic, A. Adjusting batch effects in microarray expression data using empirical Bayes methods. *Biostatistics* **8**, 118-27 (2007).
89. Ernst, J. & Kellis, M. Discovery and characterization of chromatin states for systematic annotation of the human genome. *Nat Biotechnol* **28**, 817-25 (2010).
90. Ernst, J. *et al.* Mapping and analysis of chromatin state dynamics in nine human cell types. *Nature* **473**, 43-9 (2011).
91. Bernstein, B.E. *et al.* The NIH Roadmap Epigenomics Mapping Consortium. *Nat Biotechnol* **28**, 1045-8 (2010).
92. Huang, H., Chanda, P., Alonso, A., Bader, J.S. & Arking, D.E. Gene-based tests of association. *PLoS genetics* **7**, e1002177 (2011).
93. Schwartz, P.J., Moss, A.J., Vincent, G.M. & Crampton, R.S. Diagnostic criteria for the long QT syndrome. An update. *Circulation* **88**, 782-4 (1993).
94. Rossin, E.J. *et al.* Proteins encoded in genomic regions associated with immune-mediated disease physically interact and suggest underlying biology. *PLoS genetics* **7**, e1001273 (2011).
95. Lage, K. *et al.* A human phenome-interactome network of protein complexes implicated in genetic disorders. *Nat Biotechnol* **25**, 309-16 (2007).
96. Breitkreutz, B.J. *et al.* The BioGRID Interaction Database: 2008 update. *Nucleic acids research* **36**, D637-40 (2008).
97. Xenarios, I. *et al.* DIP, the Database of Interacting Proteins: a research tool for studying cellular networks of protein interactions. *Nucleic acids research* **30**, 303-5 (2002).
98. Mewes, H.W. *et al.* MIPS: analysis and annotation of genome information in 2007. *Nucleic acids research* **36**, D196-201 (2008).
99. Kanehisa, M. & Goto, S. KEGG: kyoto encyclopedia of genes and genomes. *Nucleic acids research* **28**, 27-30 (2000).
100. Aranda, B. *et al.* The IntAct molecular interaction database in 2010. *Nucleic acids research* **38**, D525-31 (2010).
101. A haplotype map of the human genome. *Nature* **437**, 1299-320 (2005).
102. Fujita, P.A. *et al.* The UCSC Genome Browser database: update 2011. *Nucleic acids research* **39**, D876-82 (2011).
103. Sakuntabhai, A. *et al.* Mutations in ATP2A2, encoding a Ca<sup>2+</sup> pump, cause Darier disease. *Nature genetics* **21**, 271-7 (1999).
104. Yoshida, M. *et al.* Impaired Ca<sup>2+</sup> store functions in skeletal and cardiac muscle cells from sarcoplasmic reticulum-deficient mice. *J Biol Chem* **280**, 3500-6 (2005).

105. Shimura, M. *et al.* Sarcalumenin alleviates stress-induced cardiac dysfunction by improving Ca<sup>2+</sup> handling of the sarcoplasmic reticulum. *Cardiovasc Res* **77**, 362-70 (2008).
106. Jiao, Q. *et al.* Sarcalumenin is essential for maintaining cardiac function during endurance exercise training. *Am J Physiol Heart Circ Physiol* **297**, H576-82 (2009).
107. Braz, J.C. *et al.* PKC- $\alpha$  regulates cardiac contractility and propensity toward heart failure. *Nat Med* **10**, 248-54 (2004).
108. Sundivakkam, P.C. *et al.* Caveolin-1 scaffold domain interacts with TRPC1 and IP3R3 to regulate Ca<sup>2+</sup> store release-induced Ca<sup>2+</sup> entry in endothelial cells. *Am J Physiol Cell Physiol* **296**, C403-13 (2009).
109. Massaelli, H. *et al.* Involvement of caveolin in low K<sup>+</sup>-induced endocytic degradation of cell-surface human ether-a-go-go-related gene (hERG) channels. *J Biol Chem* **285**, 27259-64 (2010).
110. Augustus, A.S. *et al.* Hearts lacking caveolin-1 develop hypertrophy with normal cardiac substrate metabolism. *Cell Cycle* **7**, 2509-18 (2008).
111. Runnels, L.W., Yue, L. & Clapham, D.E. TRP-PLIK, a bifunctional protein with kinase and ion channel activities. *Science* **291**, 1043-7 (2001).
112. Arduini, B.L. & Henion, P.D. Melanophore sublineage-specific requirement for zebrafish touchtone during neural crest development. *Mech Dev* **121**, 1353-64 (2004).
113. Elizondo, M.R. *et al.* Defective skeletogenesis with kidney stone formation in dwarf zebrafish mutant for *trpm7*. *Curr Biol* **15**, 667-71 (2005).
114. Jin, J. *et al.* Deletion of *Trpm7* disrupts embryonic development and thymopoiesis without altering Mg<sup>2+</sup> homeostasis. *Science* **322**, 756-60 (2008).
115. Du, J. *et al.* TRPM7-mediated Ca<sup>2+</sup> signals confer fibrogenesis in human atrial fibrillation. *Circ Res* **106**, 992-1003 (2010).
116. Roos, K.P. *et al.* Hypertrophy and heart failure in mice overexpressing the cardiac sodium-calcium exchanger. *J Card Fail* **13**, 318-29 (2007).
117. Xu, X.Q., Soo, S.Y., Sun, W. & Zweigerdt, R. Global expression profile of highly enriched cardiomyocytes derived from human embryonic stem cells. *Stem Cells* **27**, 2163-74 (2009).
118. Li, J. *et al.* Myocardin-related transcription factor B is required in cardiac neural crest for smooth muscle differentiation and cardiovascular development. *Proc Natl Acad Sci U S A* **102**, 8916-21 (2005).
119. Sack, M.N., Disch, D.L., Rockman, H.A. & Kelly, D.P. A role for Sp and nuclear receptor transcription factors in a cardiac hypertrophic growth program. *Proc Natl Acad Sci U S A* **94**, 6438-43 (1997).
120. van Loo, P.F. *et al.* Transcription factor Sp3 knockout mice display serious cardiac malformations. *Mol Cell Biol* **27**, 8571-82 (2007).
121. Okazaki, N. *et al.* The novel protein complex with SMARCAD1/KIAA1122 binds to the vicinity of TSS. *J Mol Biol* **382**, 257-65 (2008).
122. Chrivia, J.C. *et al.* Phosphorylated CREB binds specifically to the nuclear protein CBP. *Nature* **365**, 855-9 (1993).
123. Bannister, A.J. & Kouzarides, T. The CBP co-activator is a histone acetyltransferase. *Nature* **384**, 641-3 (1996).
124. Petrij, F. *et al.* Rubinstein-Taybi syndrome caused by mutations in the transcriptional co-activator CBP. *Nature* **376**, 348-51 (1995).
125. Shikama, N. *et al.* Essential function of p300 acetyltransferase activity in heart, lung and small intestine formation. *EMBO J* **22**, 5175-85 (2003).
126. Guillou, H., Zdravec, D., Martin, P.G. & Jacobsson, A. The key roles of elongases and desaturases in mammalian fatty acid metabolism: Insights from transgenic mice. *Prog Lipid Res* **49**, 186-99 (2010).
127. Segat, D. *et al.* Expression of matrilin-1, -2 and -3 in developing mouse limbs and heart. *Matrix Biol* **19**, 649-55 (2000).
128. Ichikawa, T., Suenaga, Y., Koda, T., Ozaki, T. & Nakagawara, A. DeltaNp63/BMP-7-dependent expression of matrilin-2 is involved in keratinocyte migration in response to wounding. *Biochem Biophys Res Commun* **369**, 994-1000 (2008).
129. Kasper, G. *et al.* The human LAPT4b transcript is upregulated in various types of solid tumours and seems to play a dual functional role during tumour progression. *Cancer Lett* **224**, 93-103 (2005).
130. Labeit, S. & Kolmerer, B. Titins: giant proteins in charge of muscle ultrastructure and elasticity. *Science* **270**, 293-6 (1995).
131. Labeit, S., Kolmerer, B. & Linke, W.A. The giant protein titin. Emerging roles in physiology and pathophysiology. *Circ Res* **80**, 290-4 (1997).

132. Satoh, M. *et al.* Structural analysis of the titin gene in hypertrophic cardiomyopathy: identification of a novel disease gene. *Biochem Biophys Res Commun* **262**, 411-7 (1999).
133. Itoh-Satoh, M. *et al.* Titin mutations as the molecular basis for dilated cardiomyopathy. *Biochem Biophys Res Commun* **291**, 385-93 (2002).
134. Herman, D.S. *et al.* Truncations of titin causing dilated cardiomyopathy. *The New England journal of medicine* **366**, 619-28 (2012).
135. Hackman, P. *et al.* Tibial muscular dystrophy is a titinopathy caused by mutations in TTN, the gene encoding the giant skeletal-muscle protein titin. *Am J Hum Genet* **71**, 492-500 (2002).
